# Supplementary material
Source: PubMed Central journal article supplement (PMC3531244)

**Supplementary Material:**

**Pyridylthiazole-Based Ureas as Inhibitors of Rho Associated Protein Kinases (ROCK1 and 2)**

Roberta Pireddu,<sup>1</sup> Kara Forinash,<sup>1</sup> Nan N. Sun,<sup>2</sup> Mathew P. Martin,<sup>1</sup> Shen-Shu Sung,<sup>2</sup> Brian Alexander,<sup>1</sup> Jin-Yi Zhu,<sup>1</sup> Wayne C. Guida,<sup>1,2,4</sup> Ernst Schönbrunn,<sup>1,3</sup> Saïd M. Sebtì<sup>1,3,5</sup> and Nicholas J. Lawrence<sup>1,3\*</sup>

*From* The <sup>1</sup>Department of Drug Discovery, and <sup>2</sup>Chemical Biology Core Facility, Moffitt Cancer Center; Departments of <sup>3</sup>Oncological Sciences, <sup>4</sup>Chemistry and <sup>5</sup>Molecular Medicine, University of South Florida, Tampa, Florida, 33612

**<sup>1</sup>H NMR Spectra**

$^1\text{H}$  NMR (DMSO- $d_6$ ) spectrum of **5a**

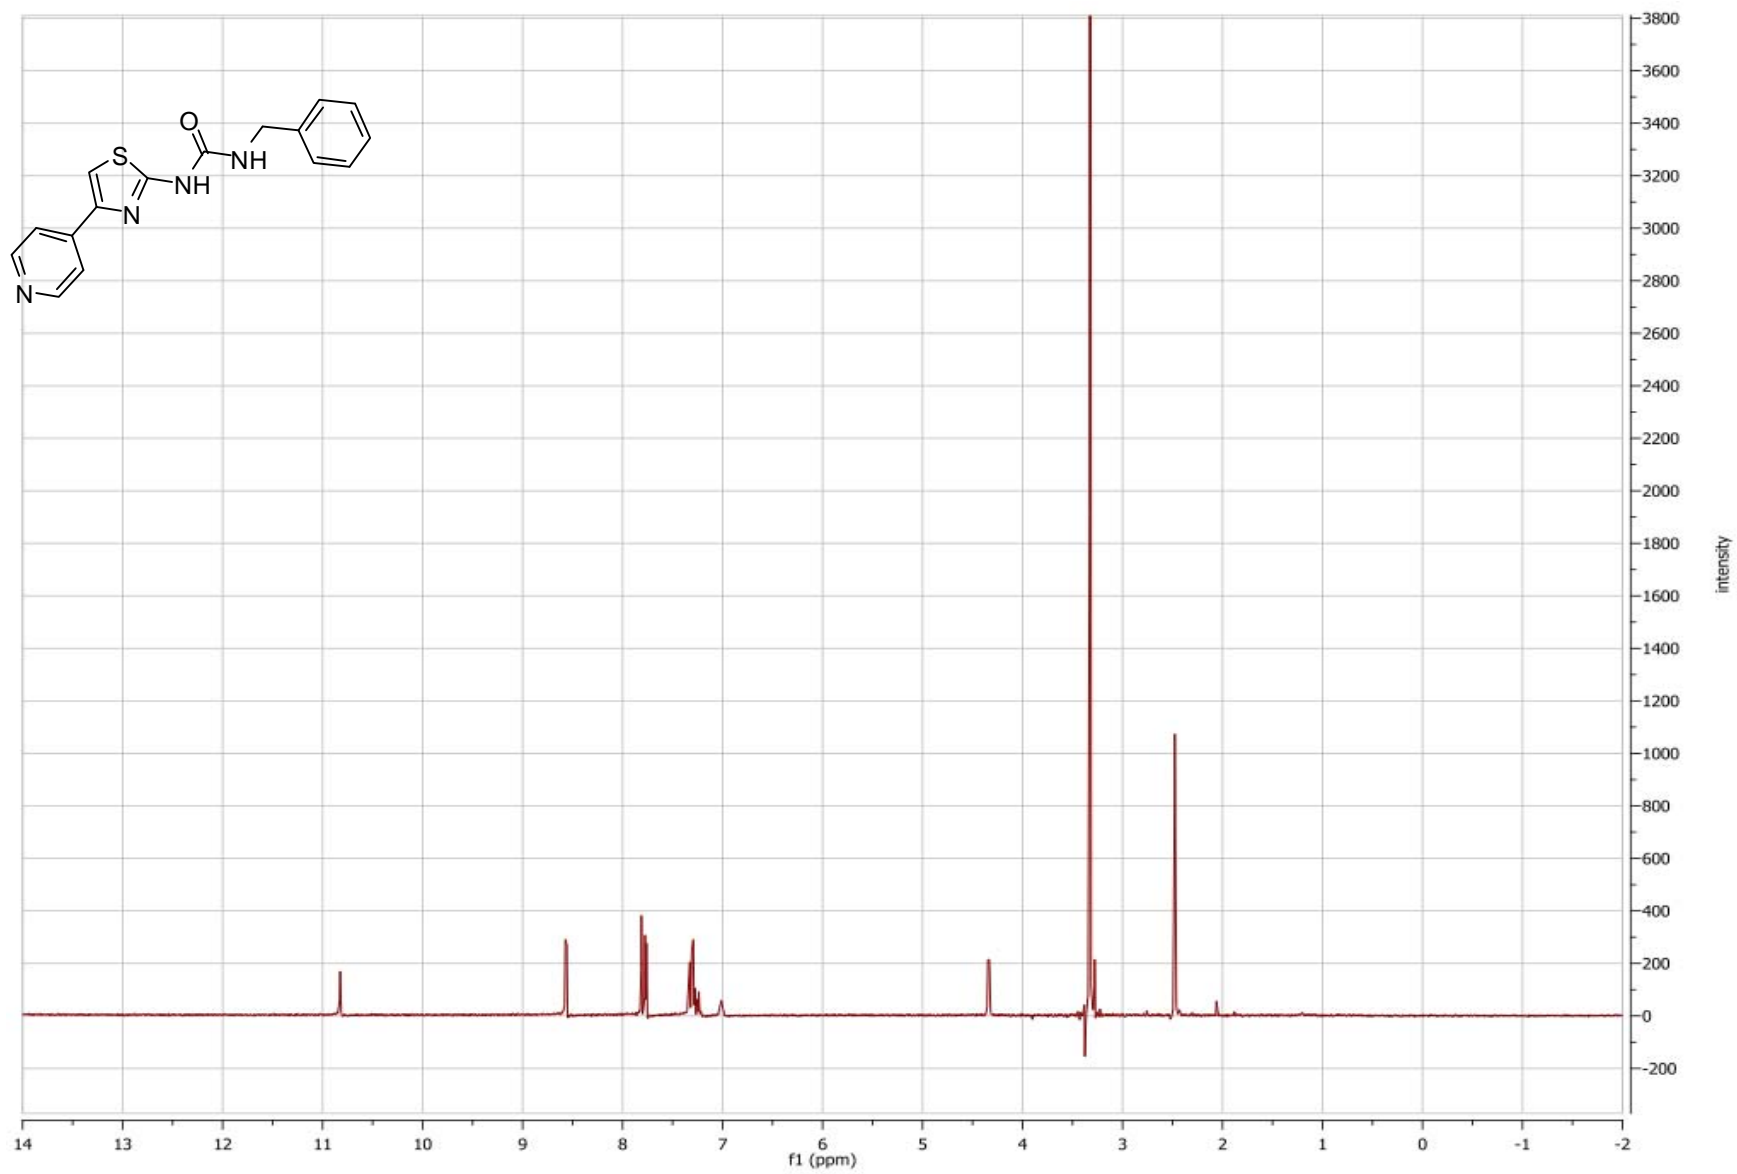

Expansion of the aromatic region of **5a**

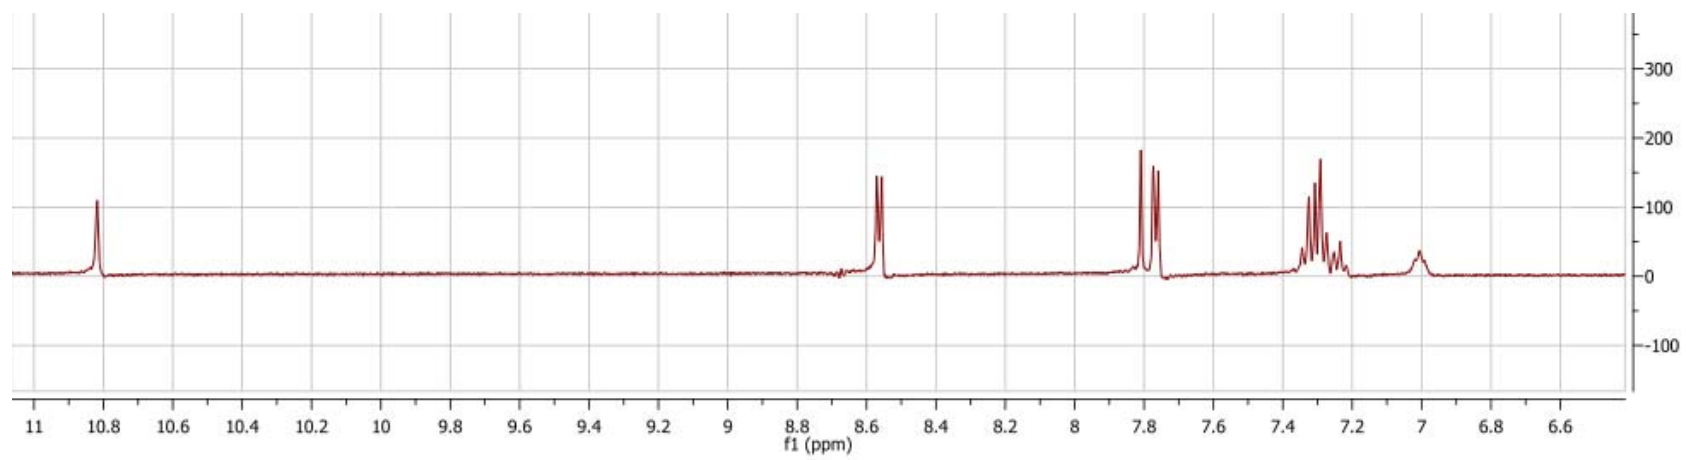

$^1\text{H}$  NMR (DMSO- $d_6$ ) spectrum of **5e**

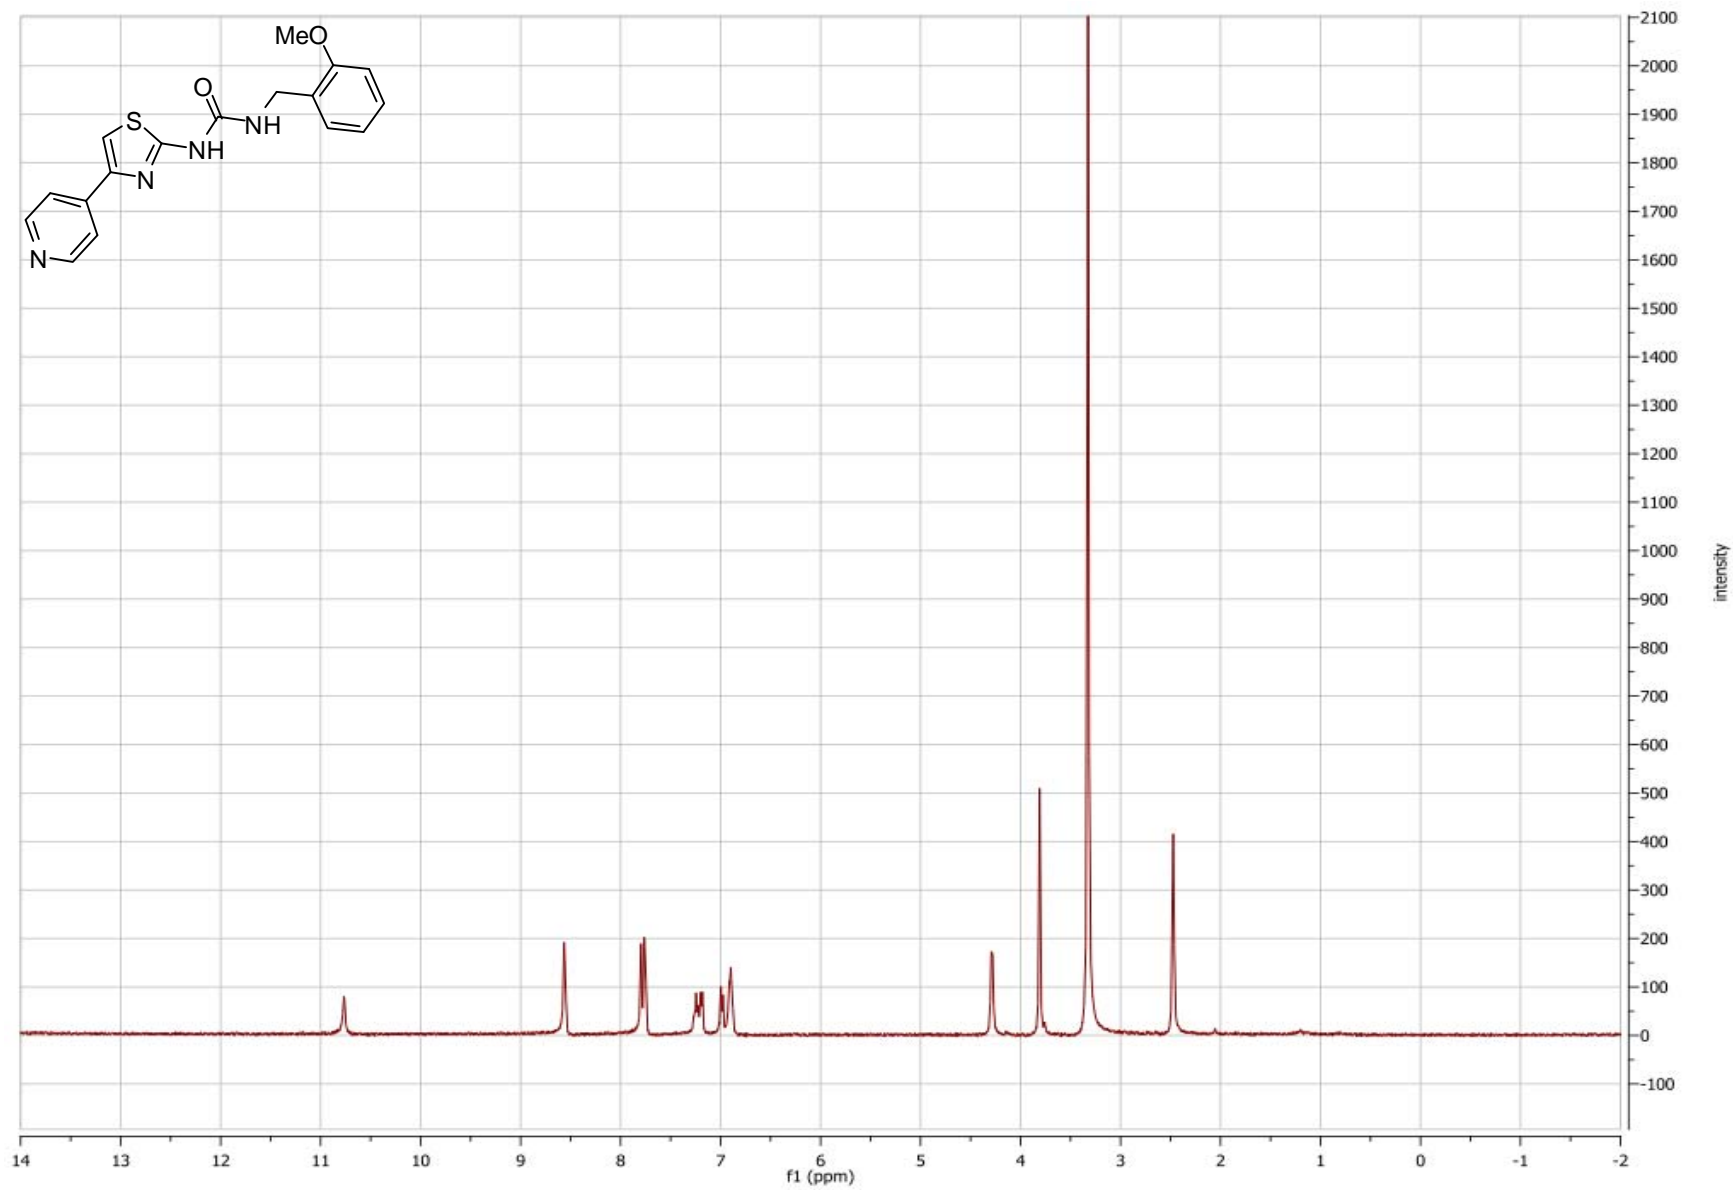

Expansion of the aromatic region of **5e**

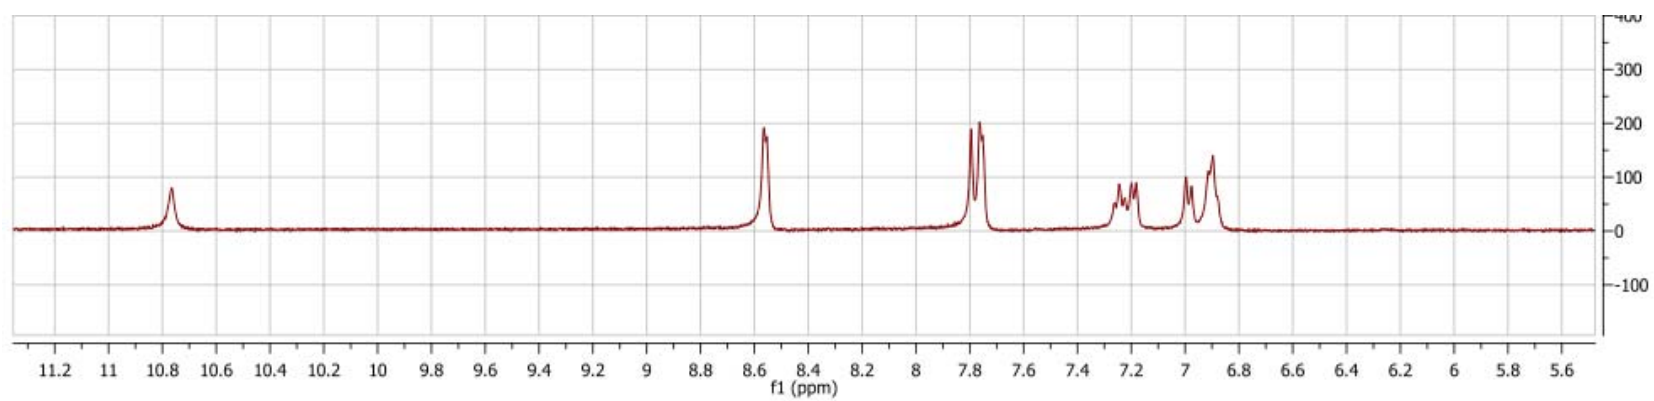

$^1\text{H}$  NMR (DMSO- $d_6$ ) spectrum of **5r**

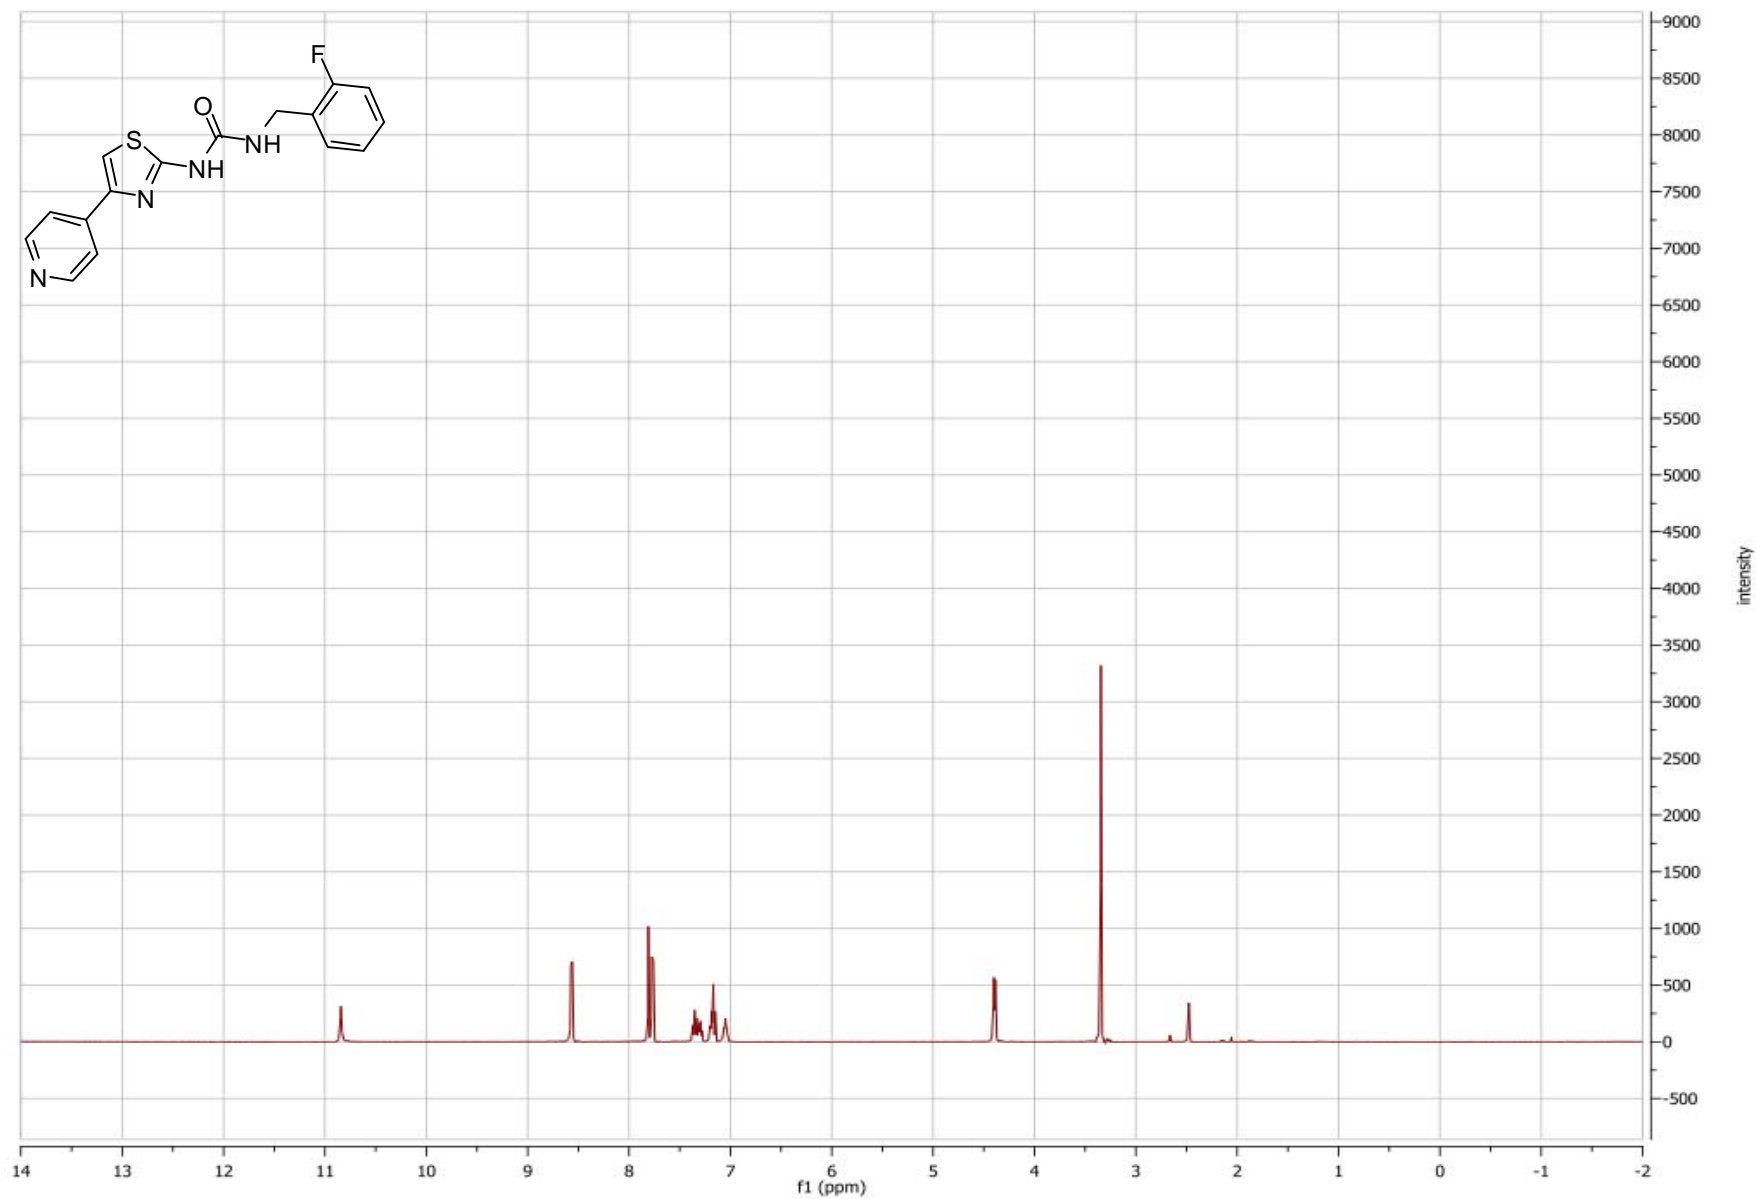

Expansion of the aromatic region of **5r**

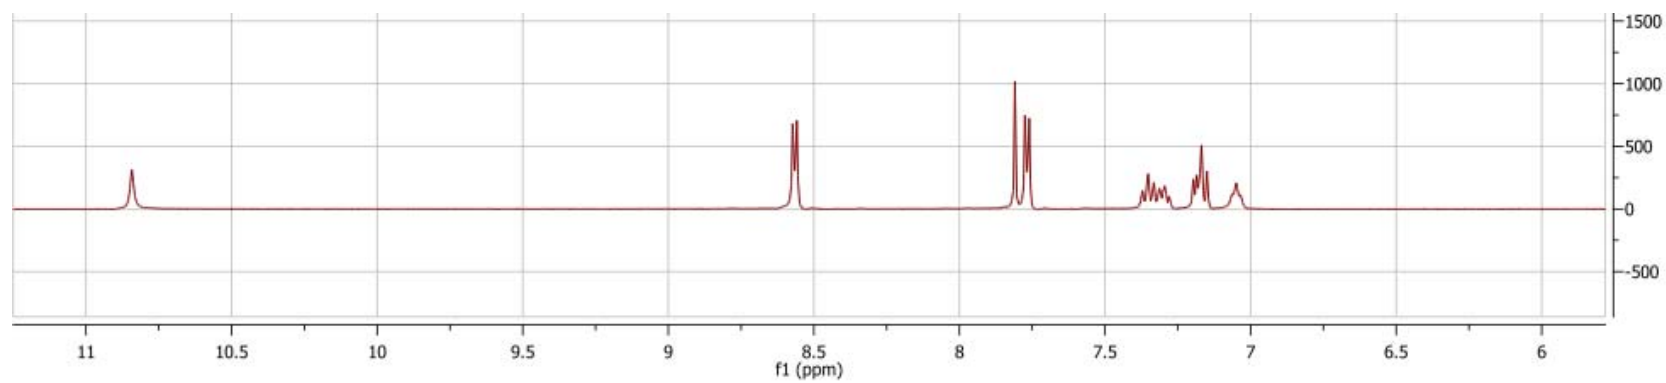

$^1\text{H}$  NMR (DMSO- $d_6$ ) spectrum of **5u**

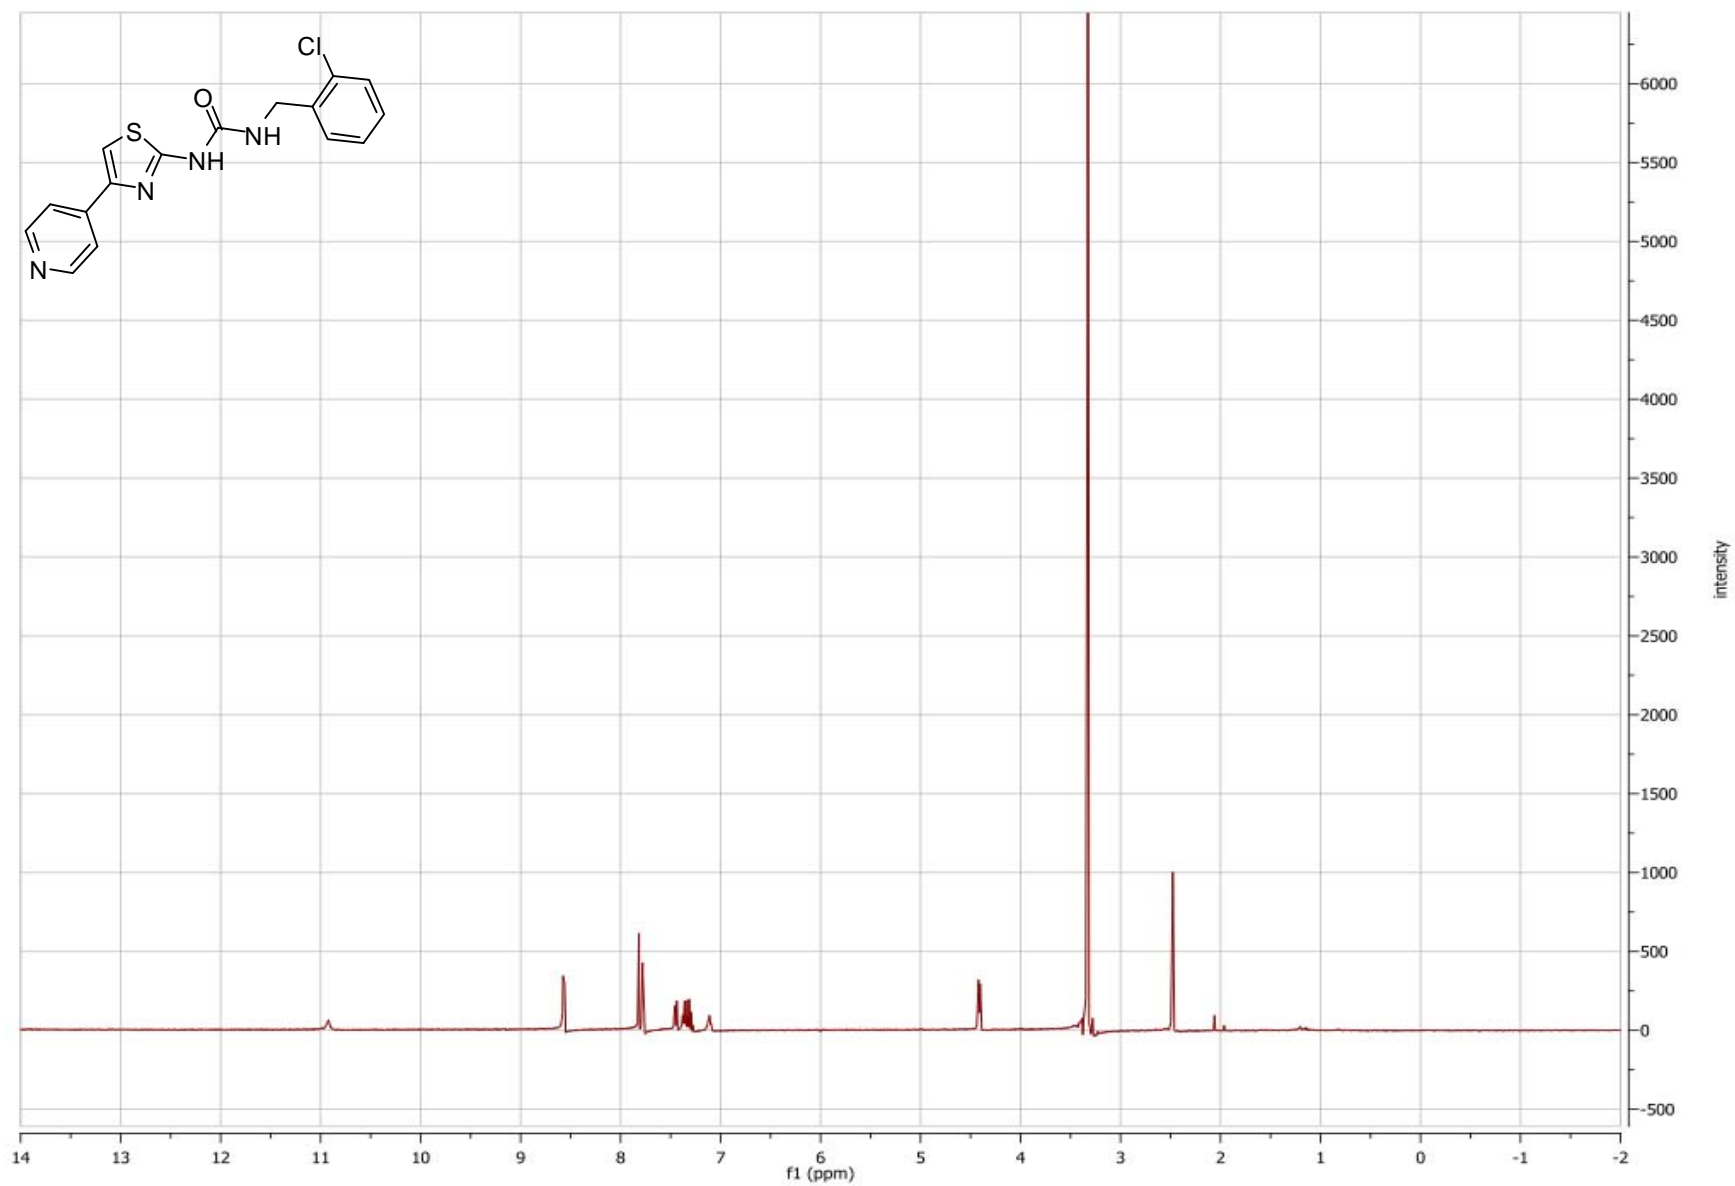



Expansion of the aromatic region of **5u**

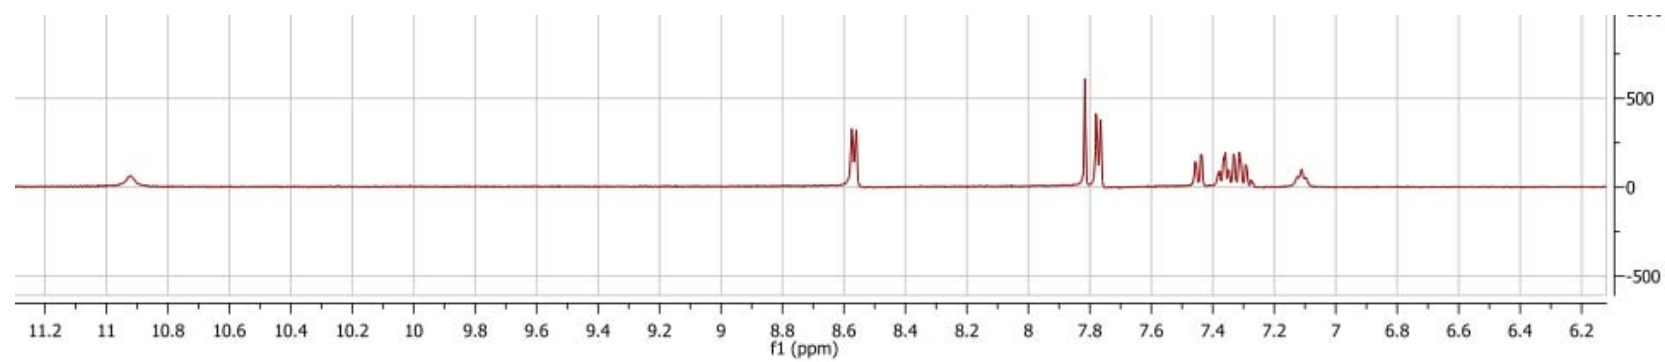

$^1\text{H}$  NMR (DMSO- $d_6$ ) spectrum of **5q**

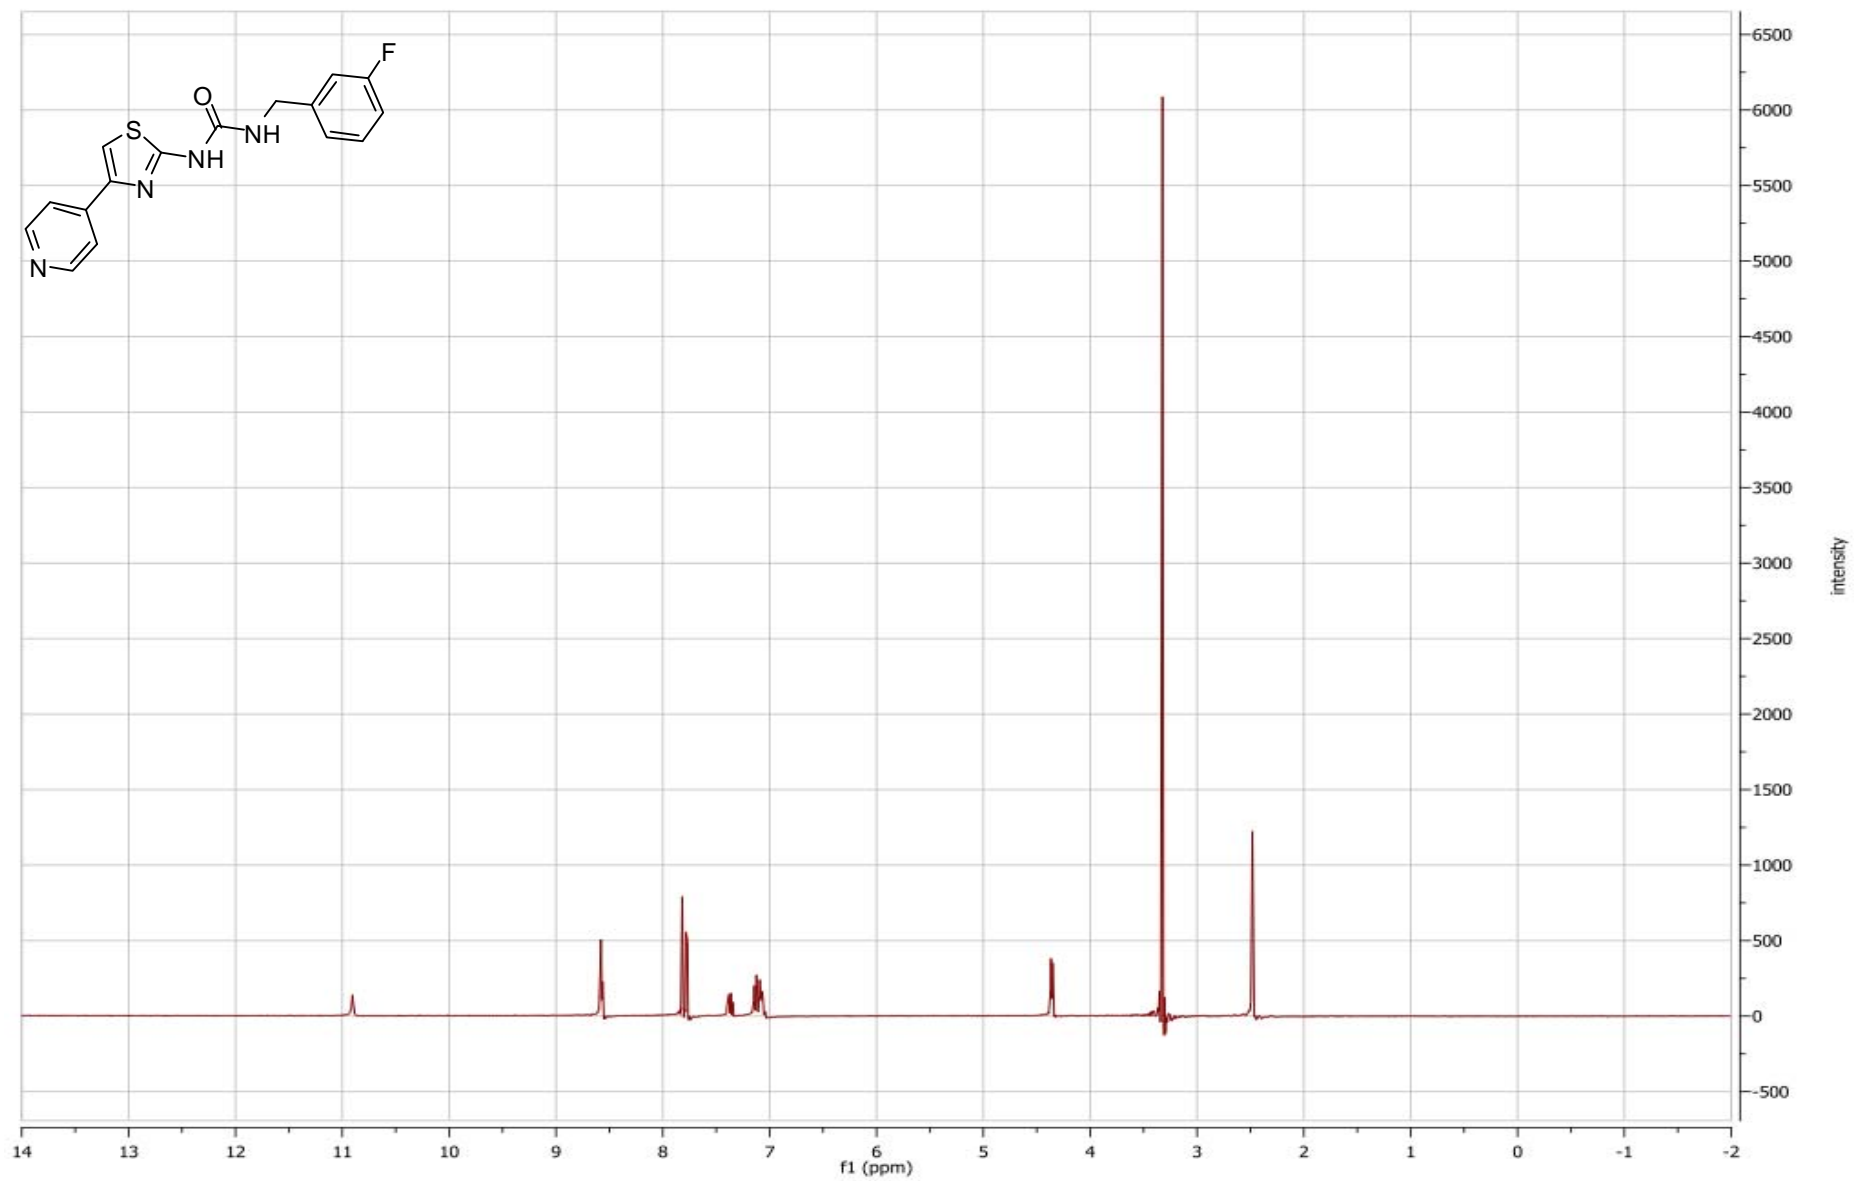

Expansion of the aromatic region of **5q**

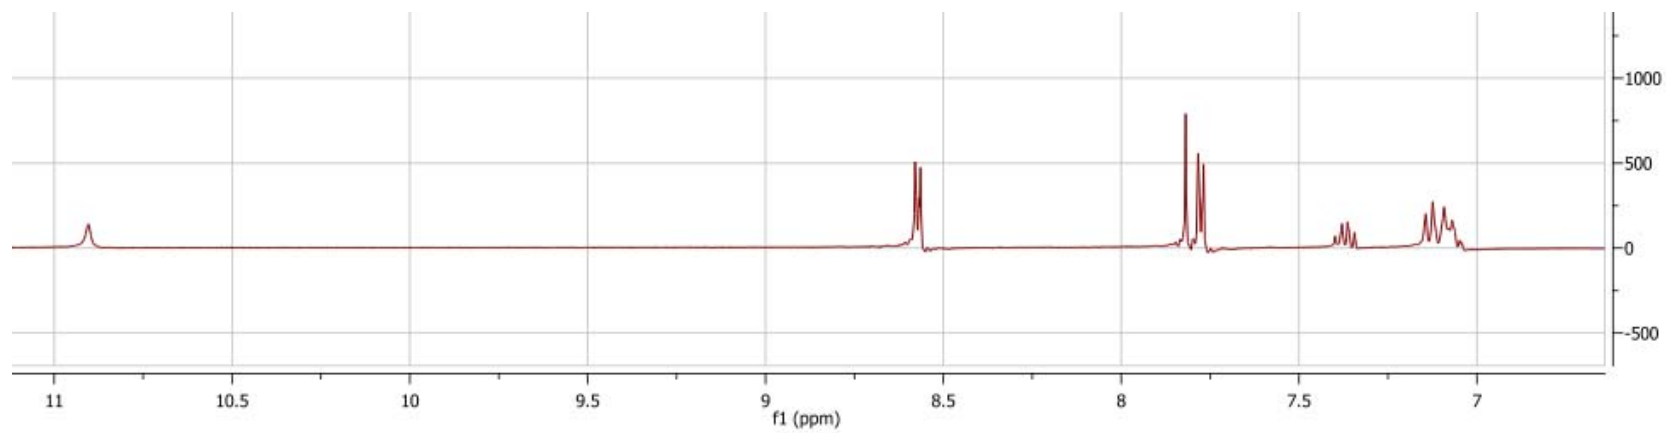

<sup>1</sup>H NMR (DMSO-d<sub>6</sub>) spectrum of **3s**

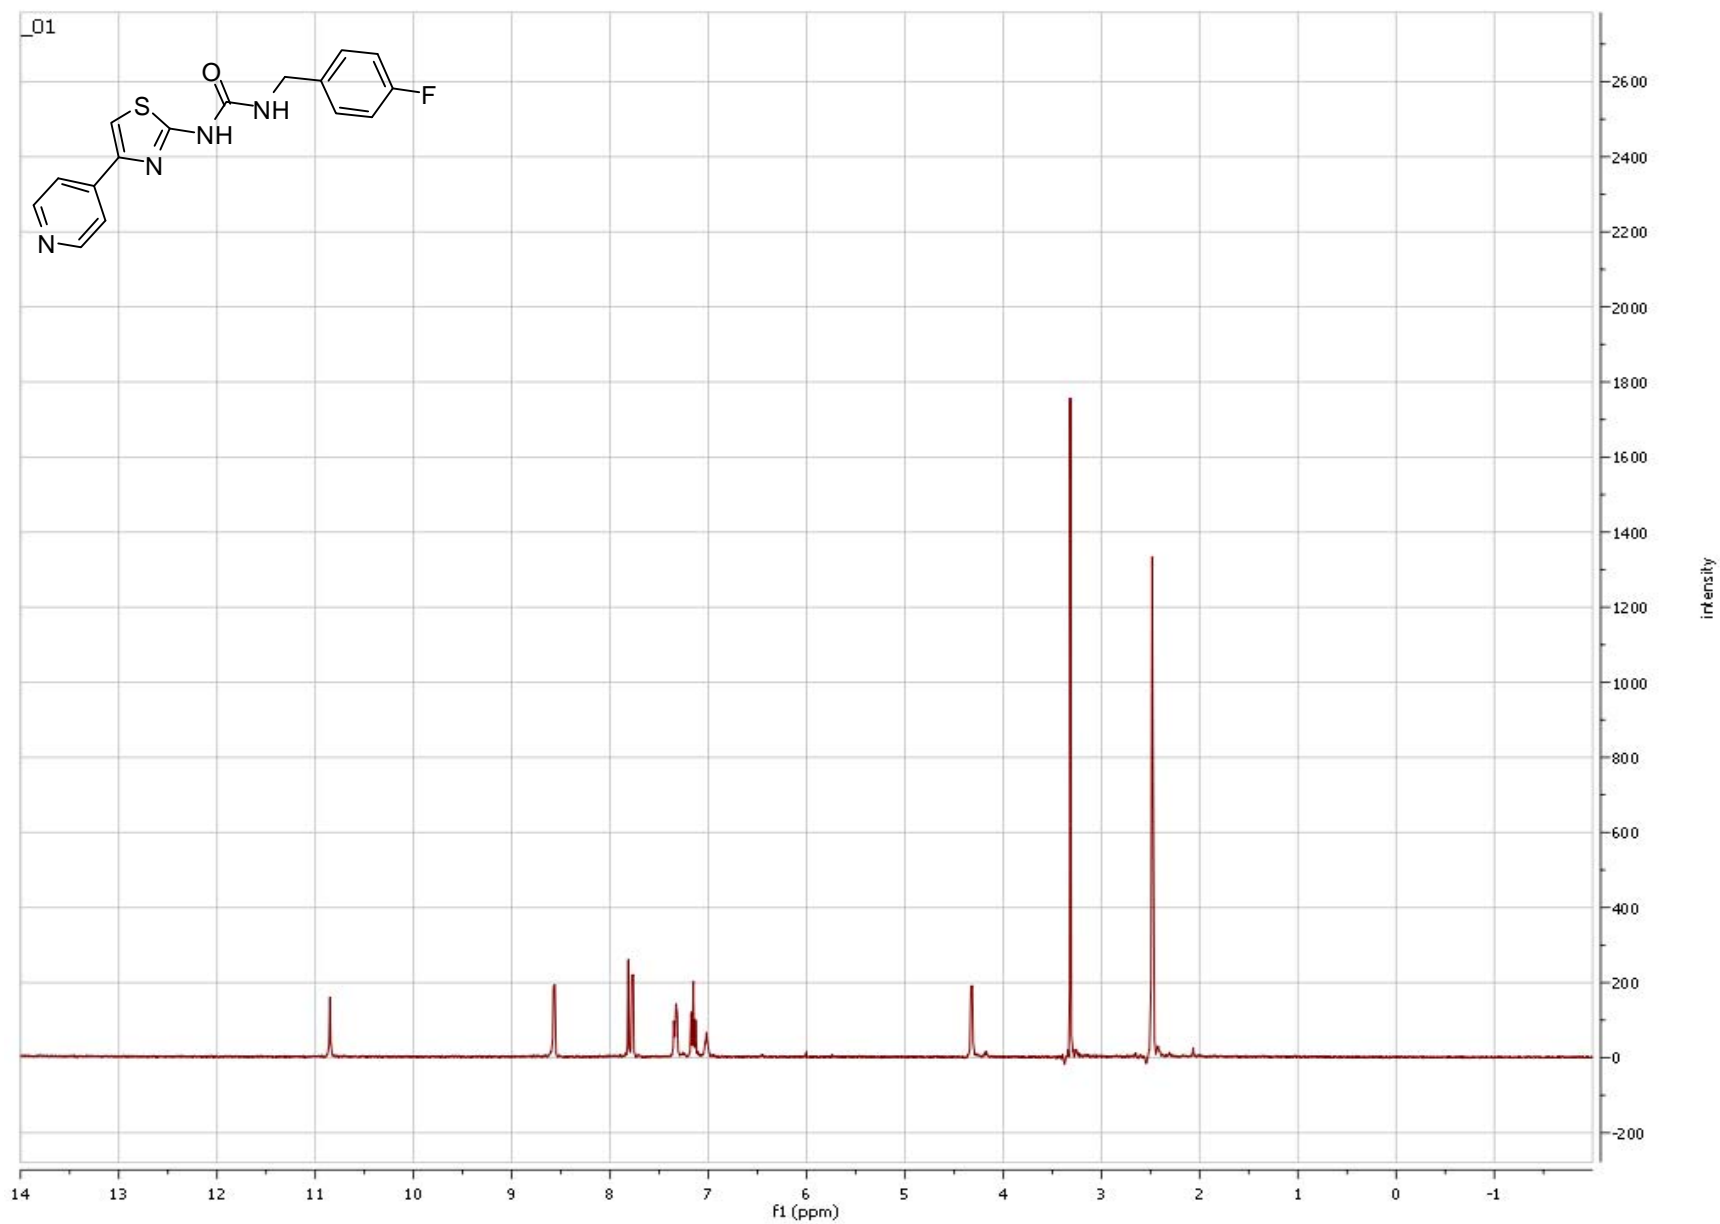

Expansion of the aromatic region of **3s**

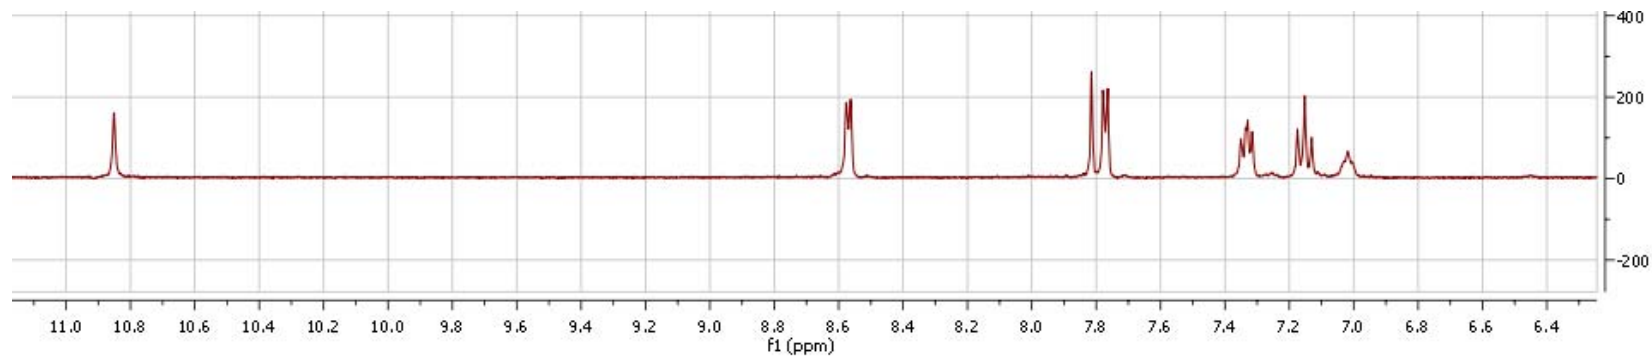

$^1\text{H}$  NMR (DMSO- $d_6$ ) spectrum of **5b**

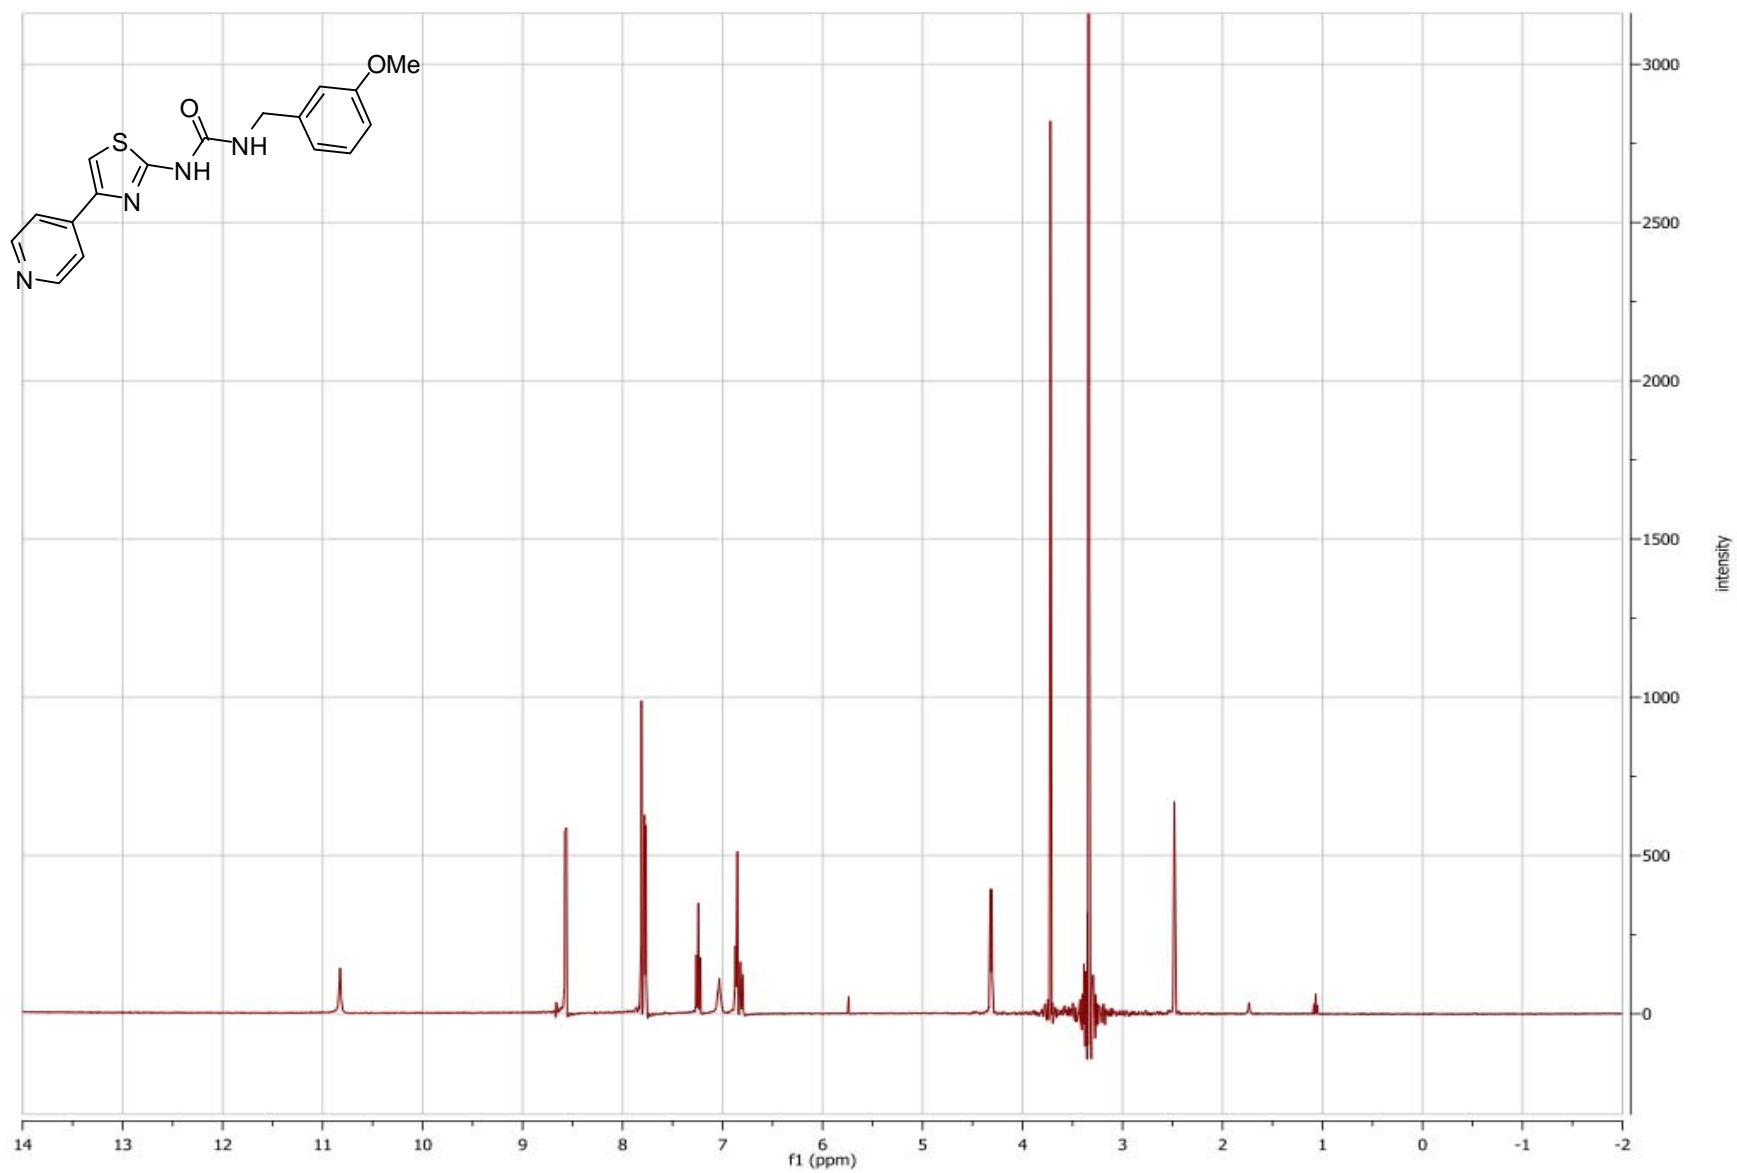

Expansion of the aromatic region of **5b**

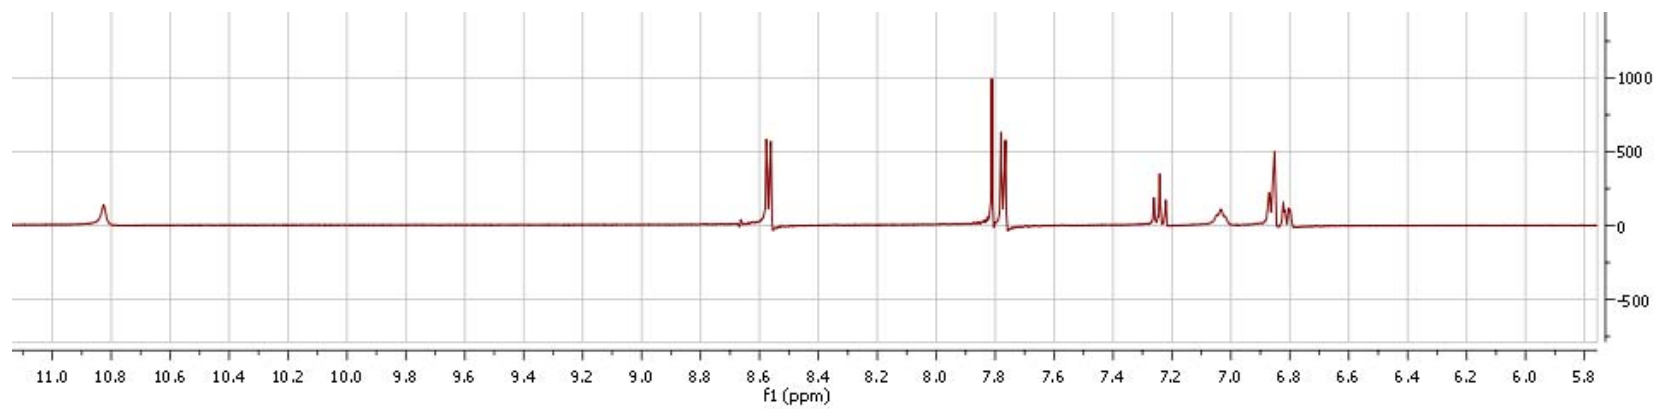

$^1\text{H}$  NMR (DMSO- $d_6$ ) spectrum of **5d**

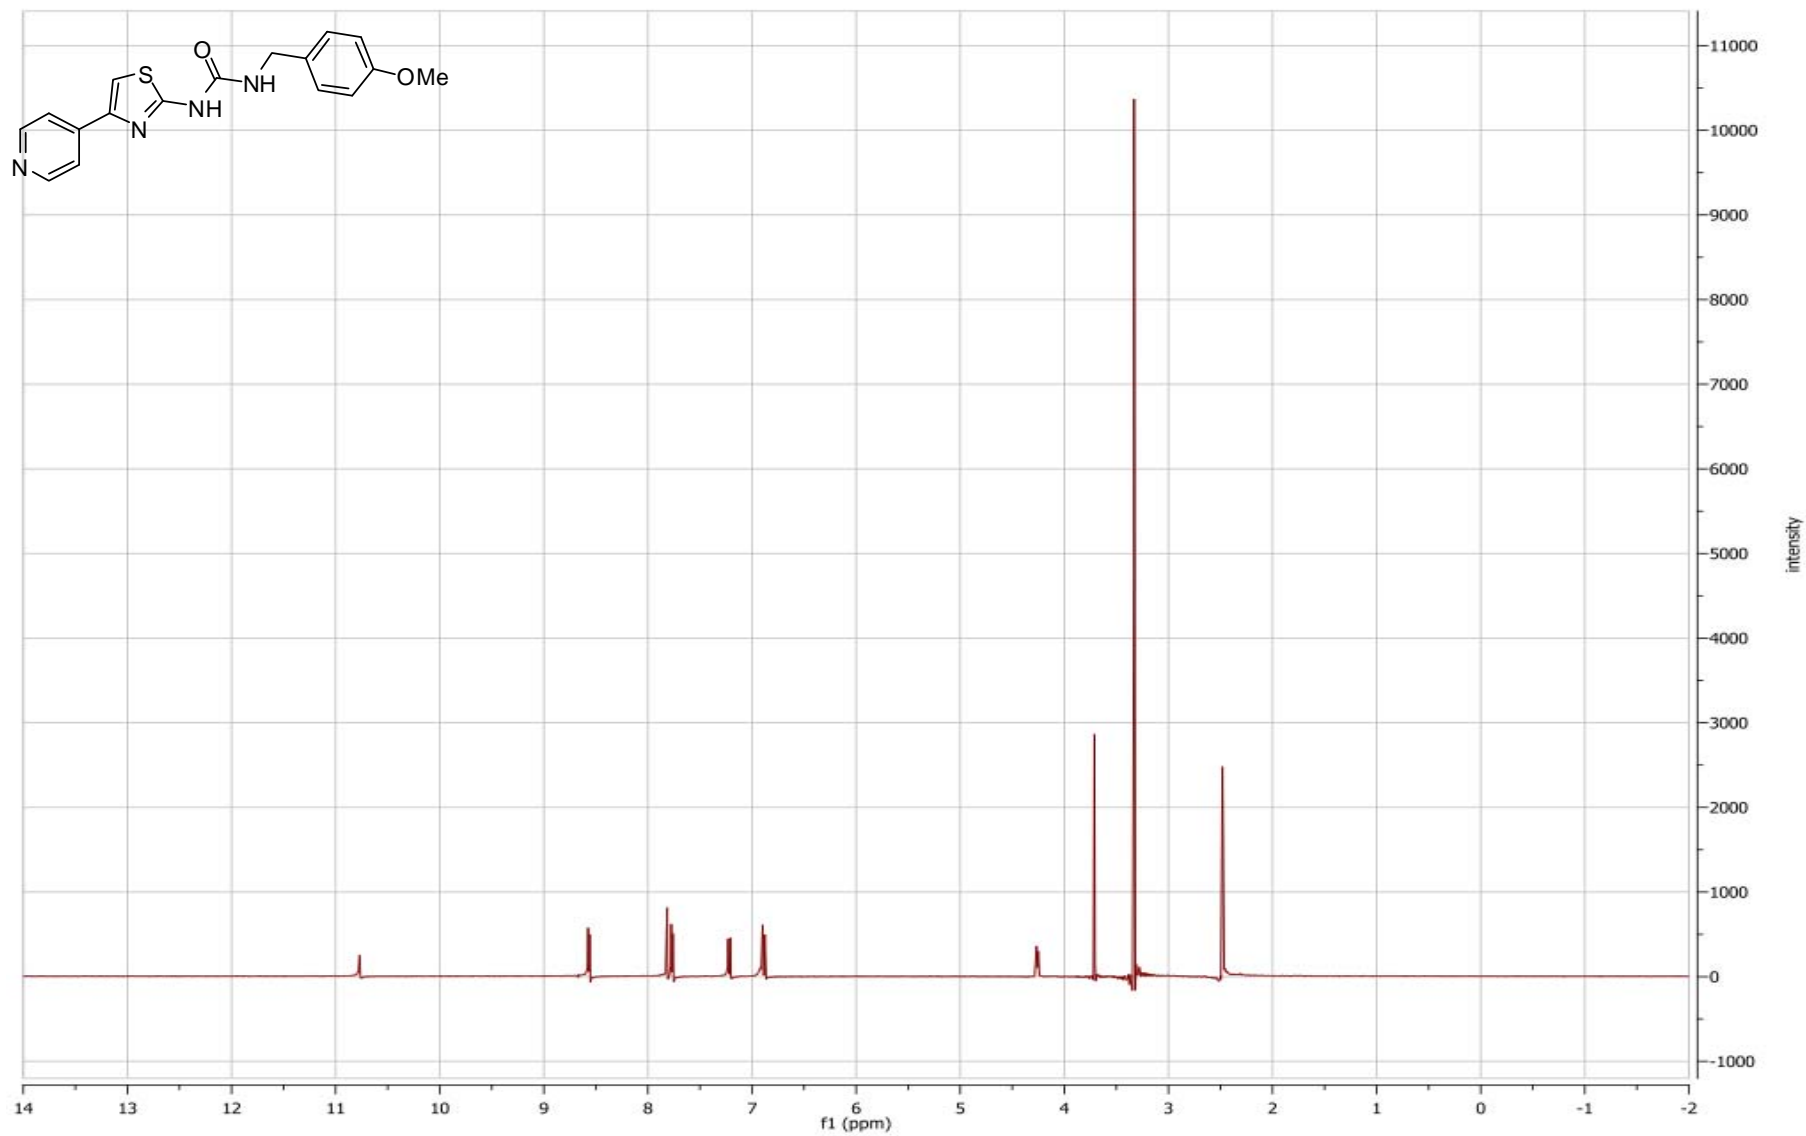



Expansion of the aromatic region of **5d**

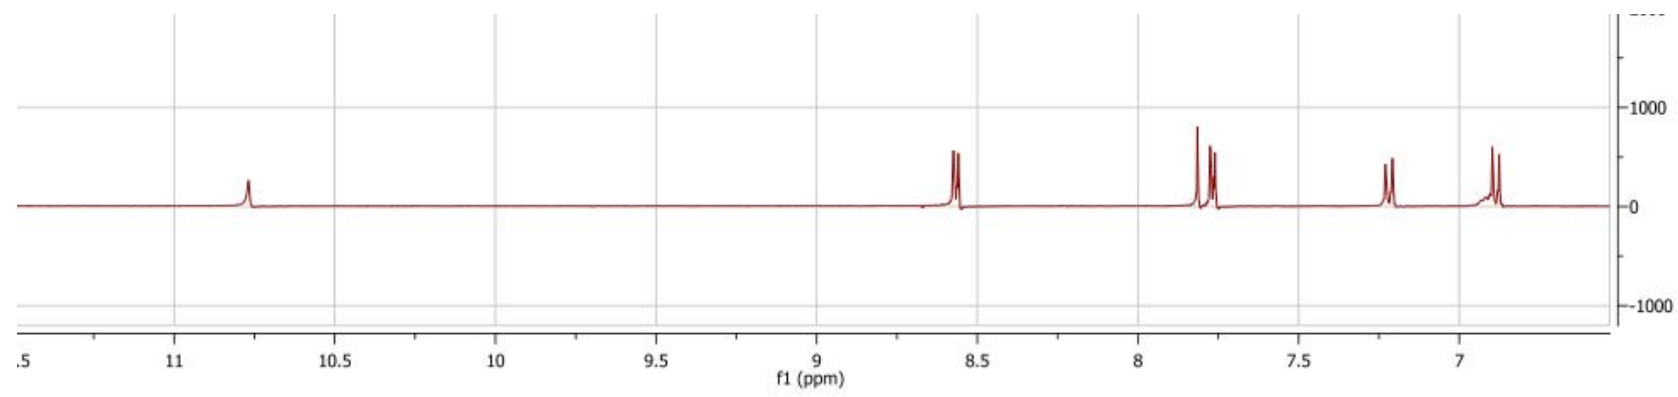

$^1\text{H}$  NMR (DMSO- $d_6$ ) spectrum of **5e**

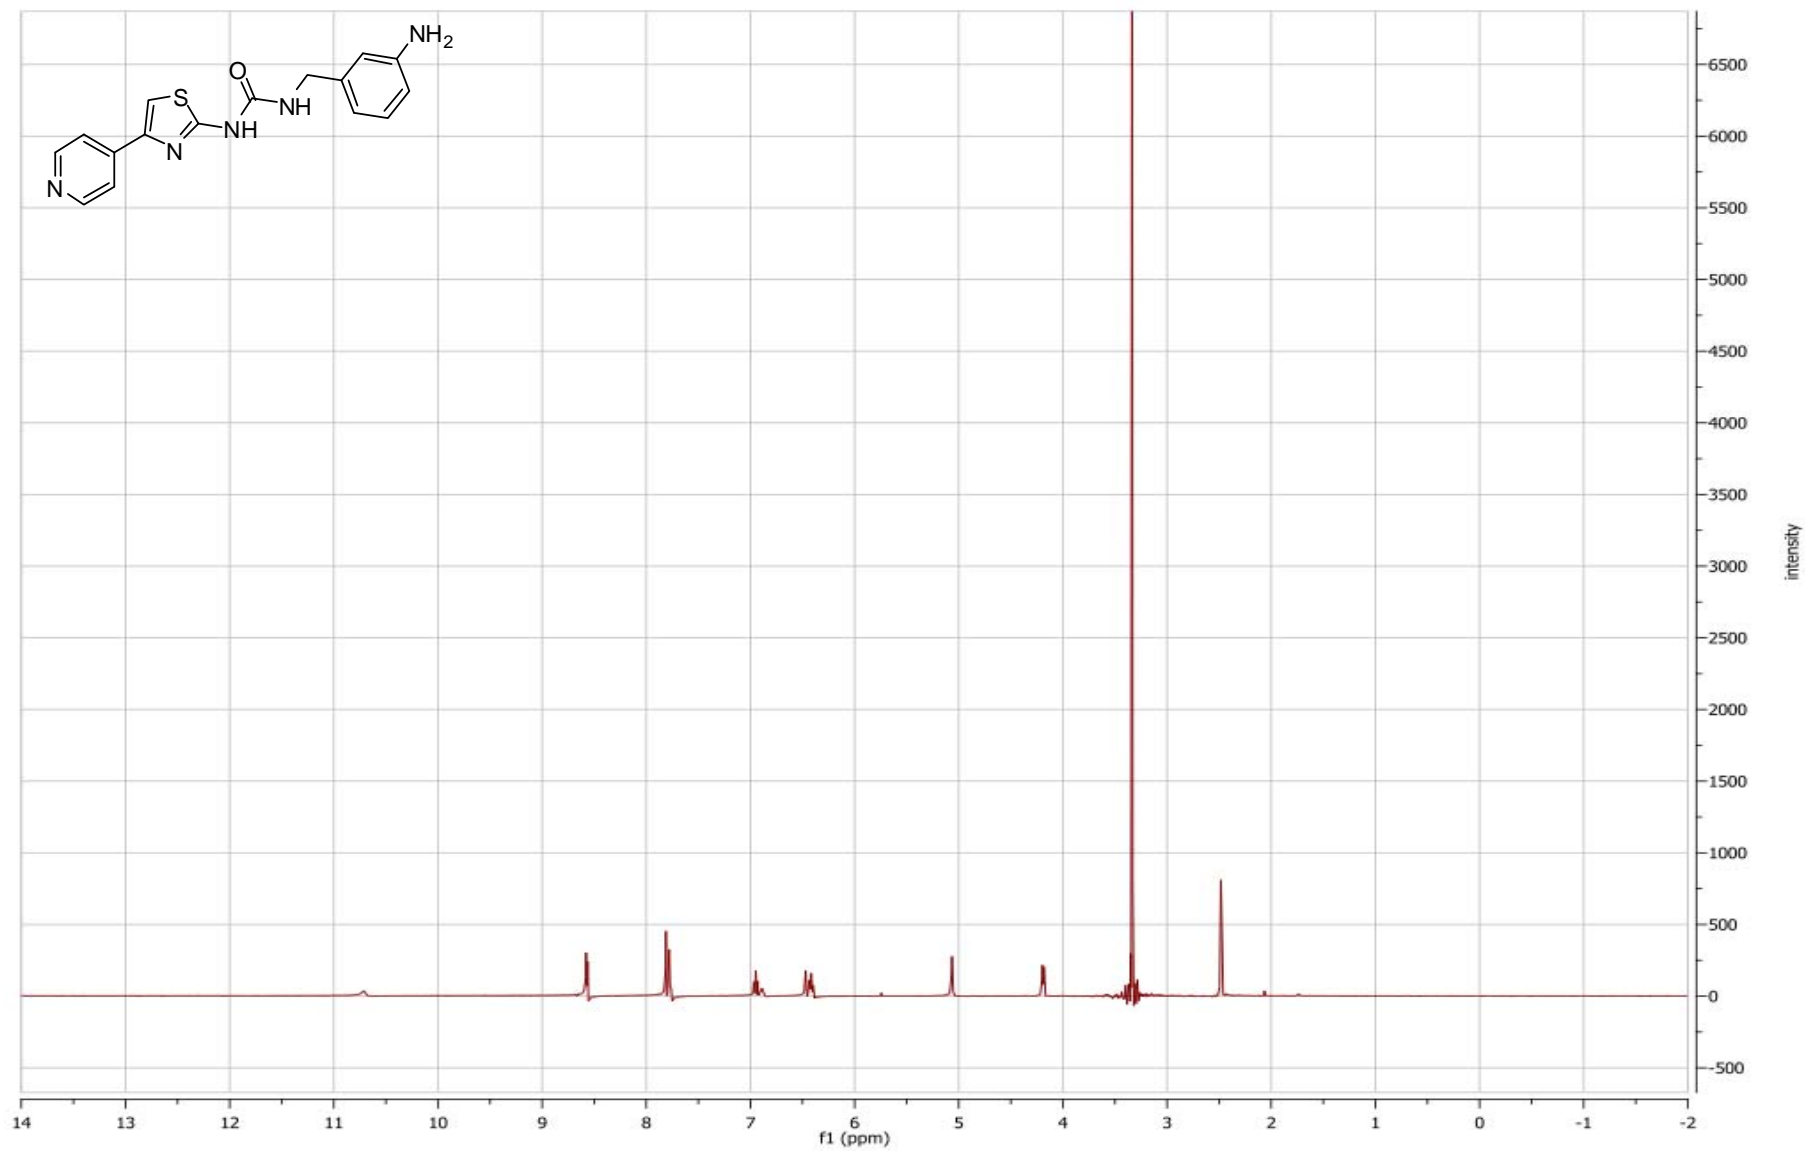

Expansion of the aromatic region of **5e**

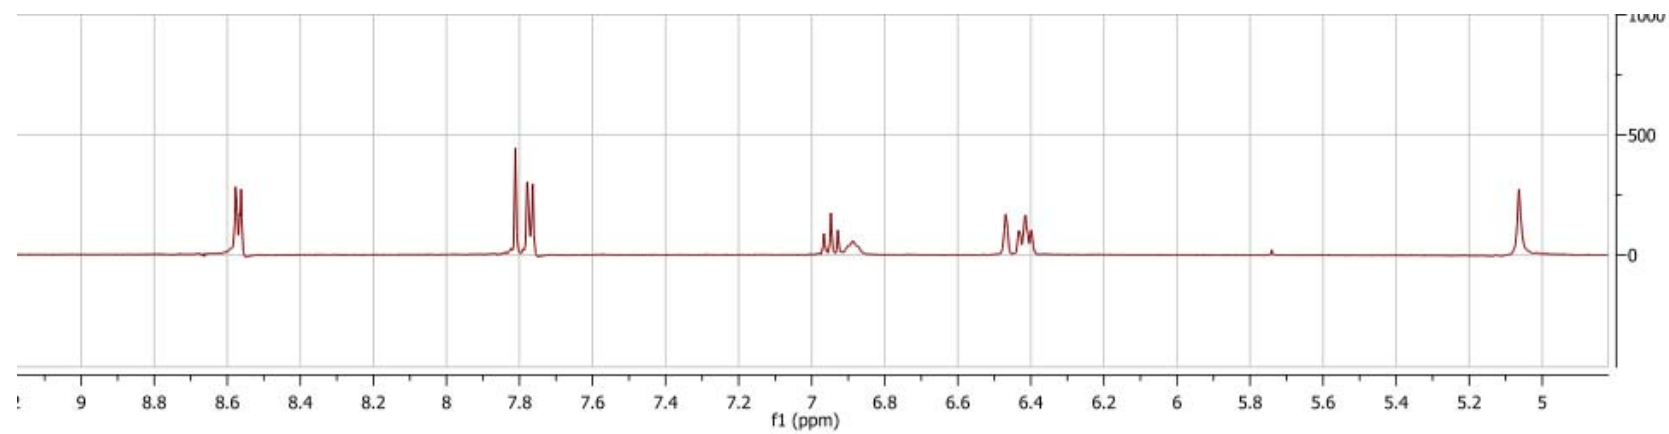

$^1\text{H}$  NMR (DMSO- $d_6$ ) spectrum of **5f**

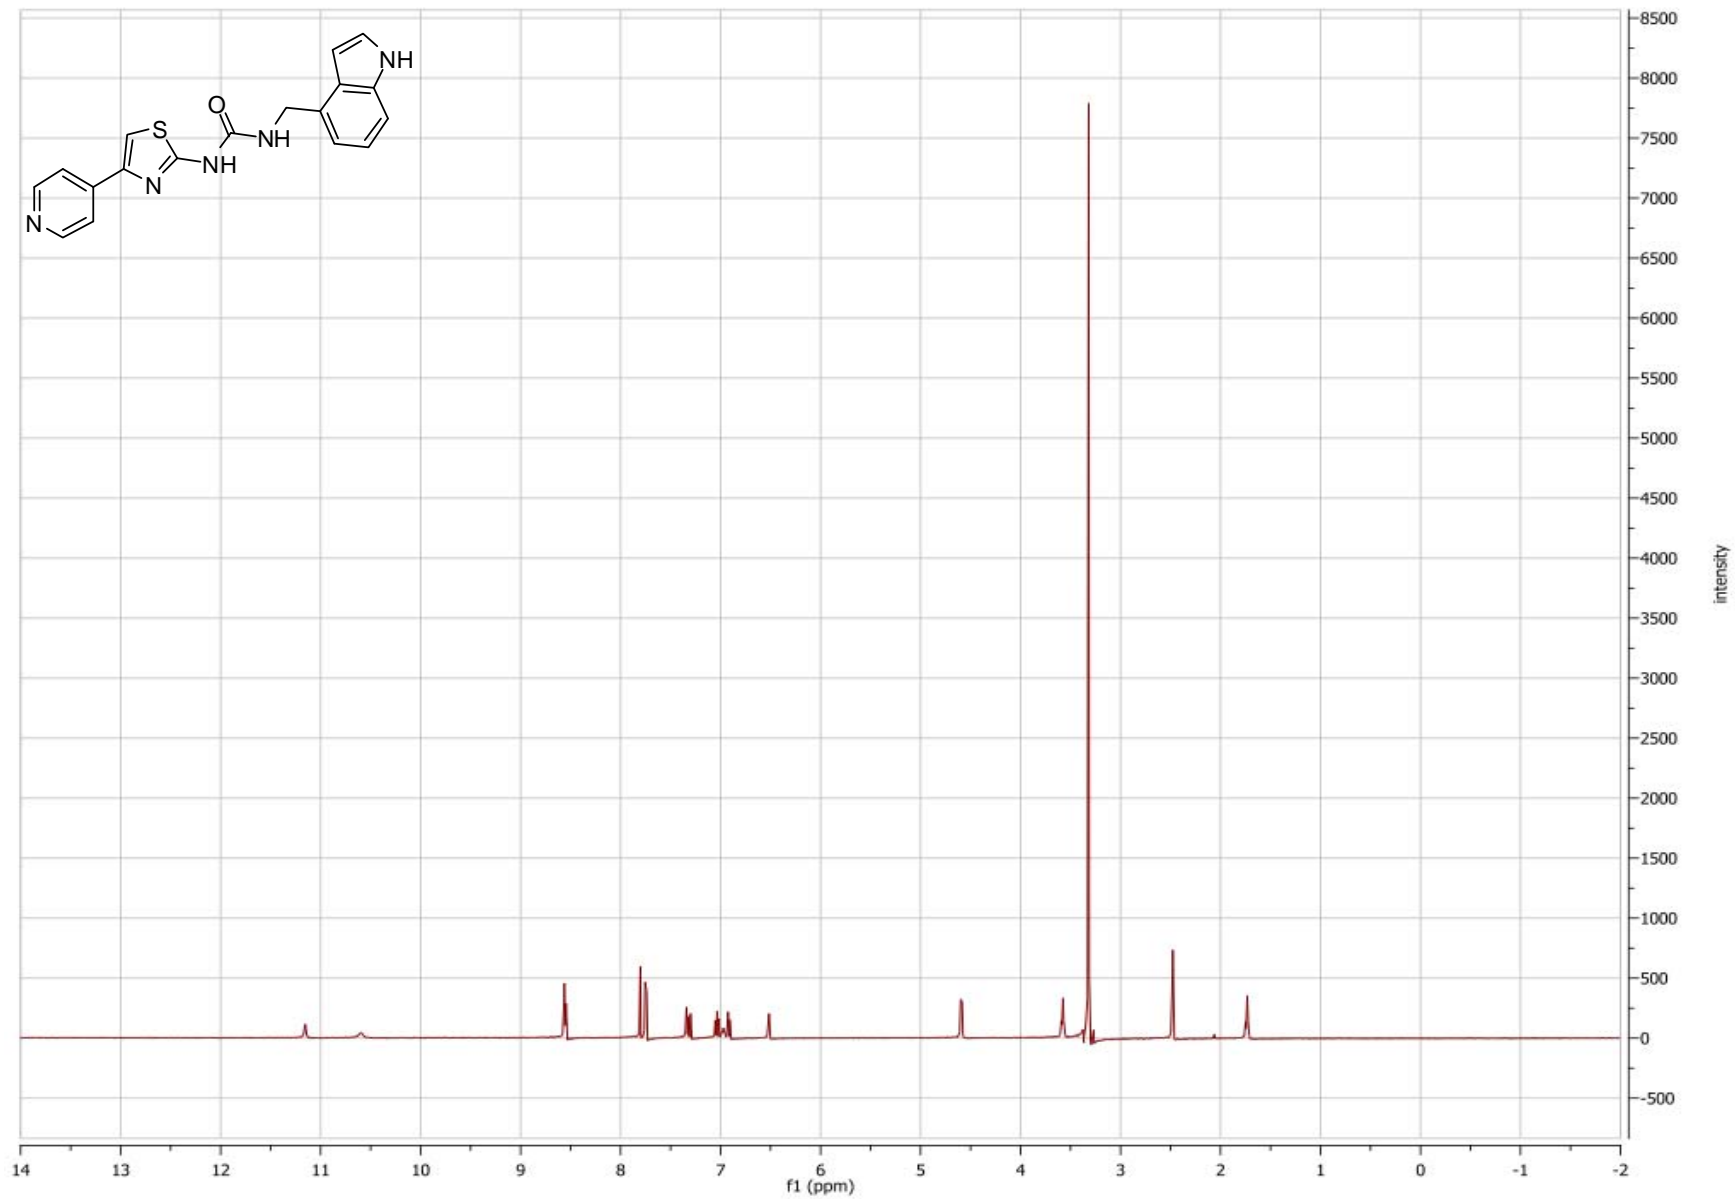

Expansion of the aromatic region of **5f**

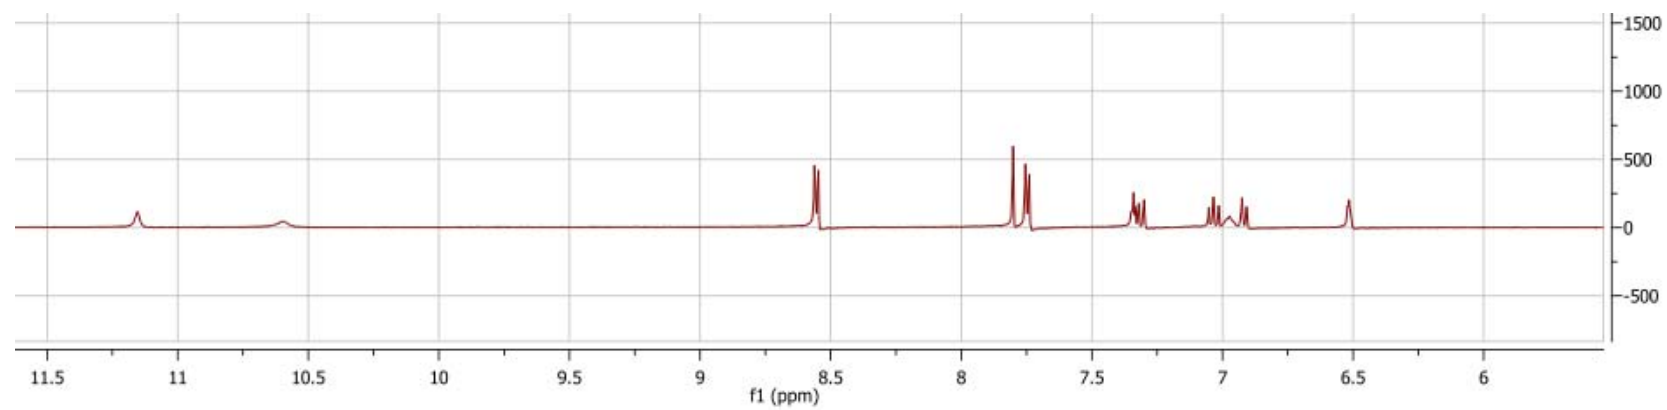

$^1\text{H}$  NMR (DMSO- $d_6$ ) spectrum of **5g**

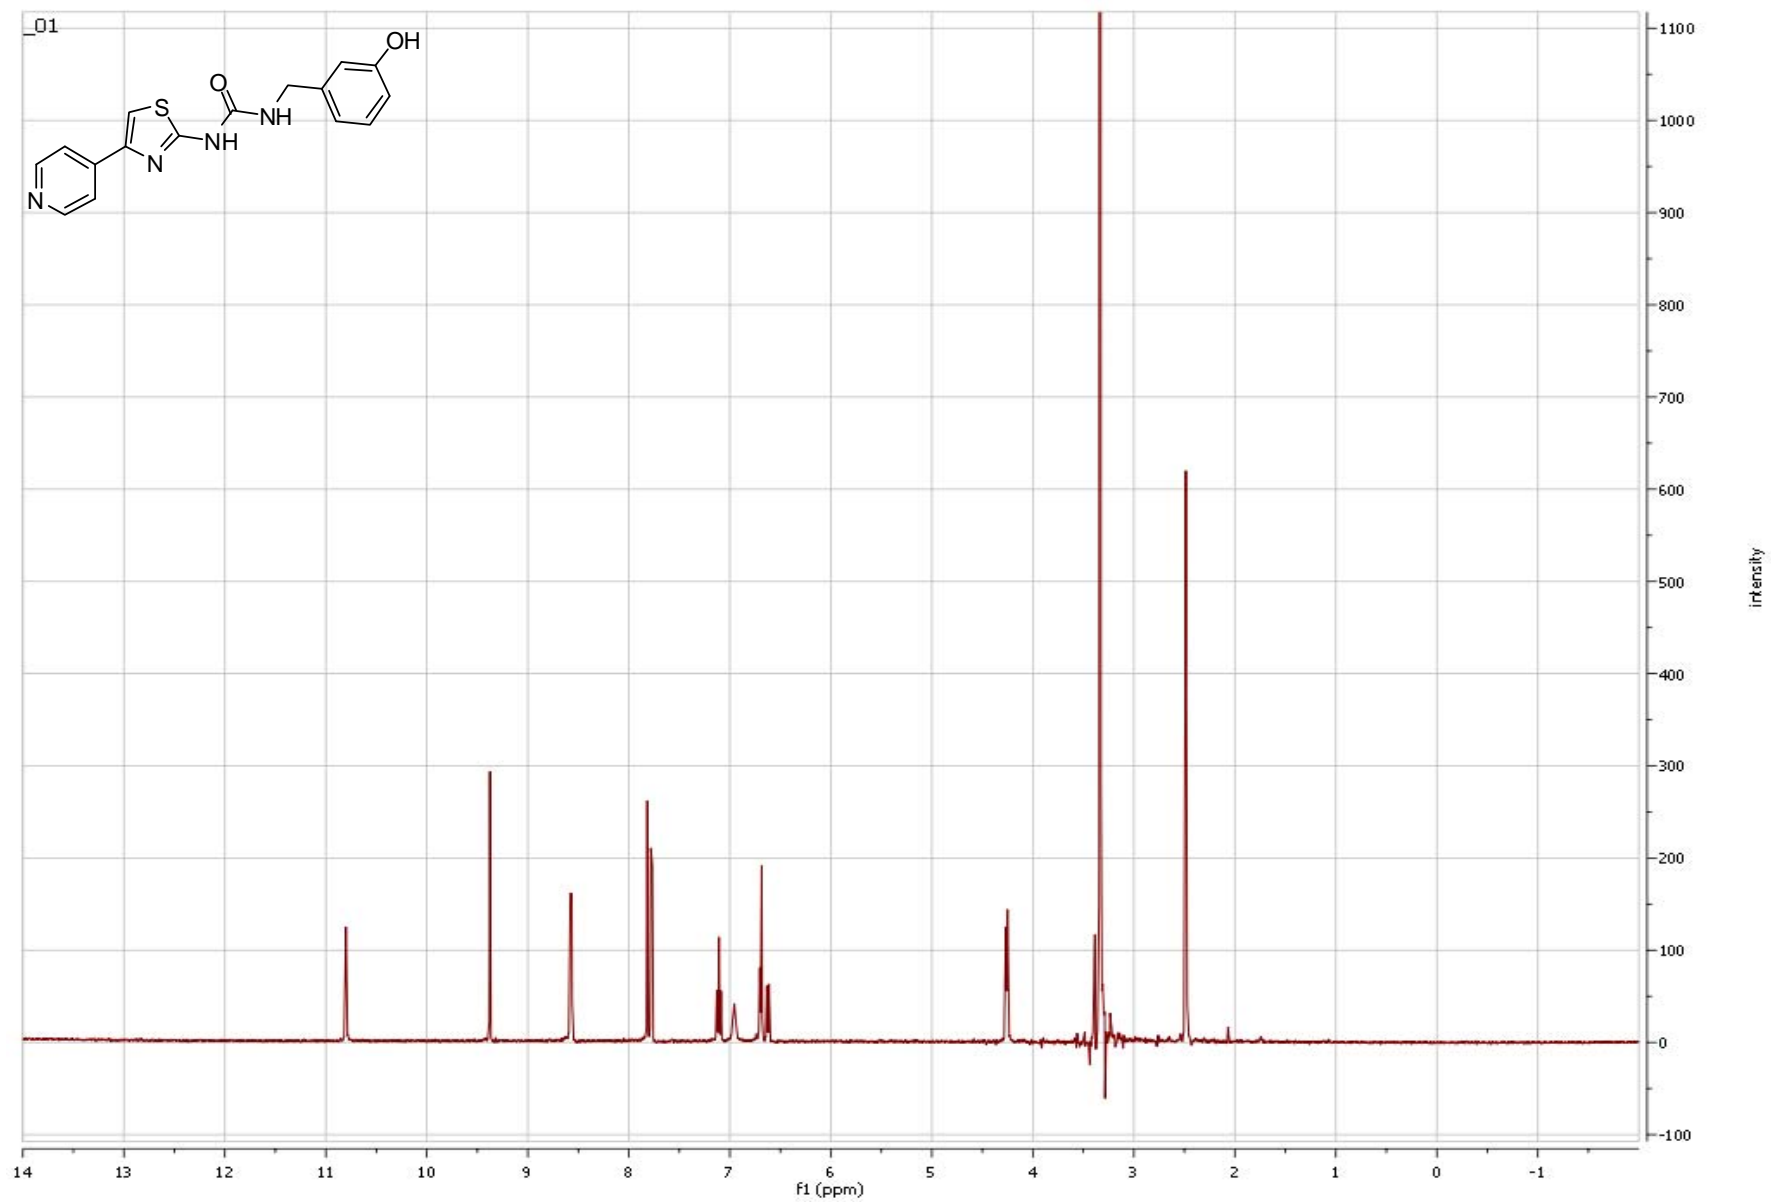

Expansion of the aromatic region of **5g**

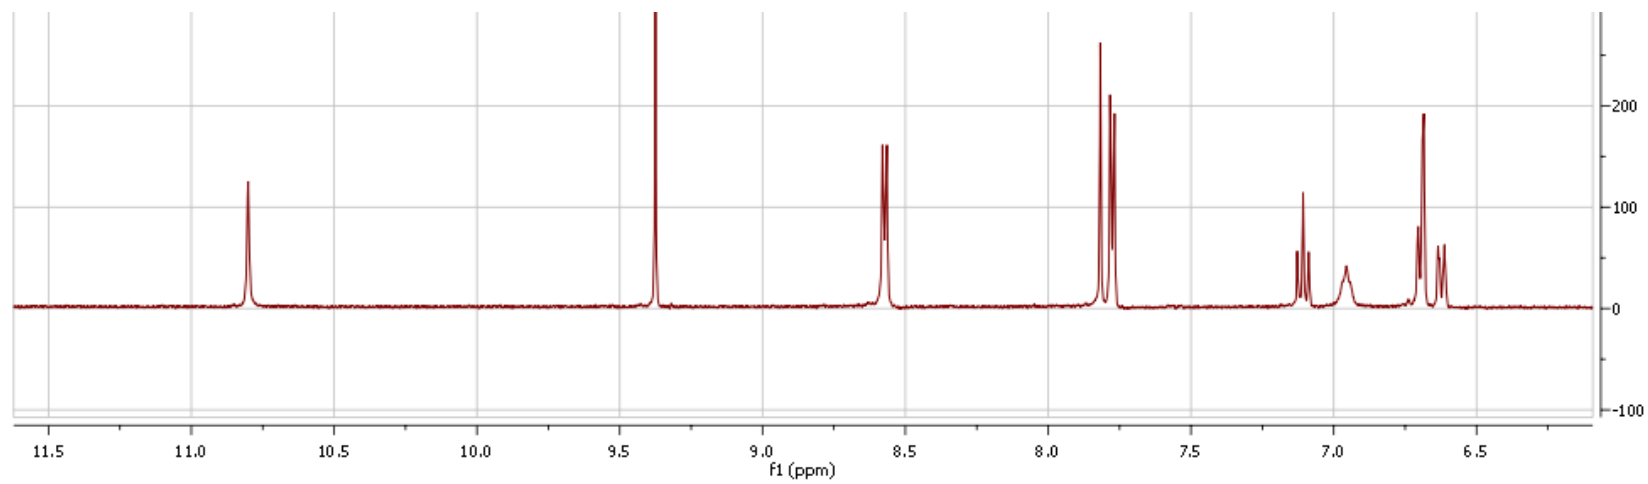

$^1\text{H}$  NMR (DMSO- $d_6$ ) spectrum of **5h**

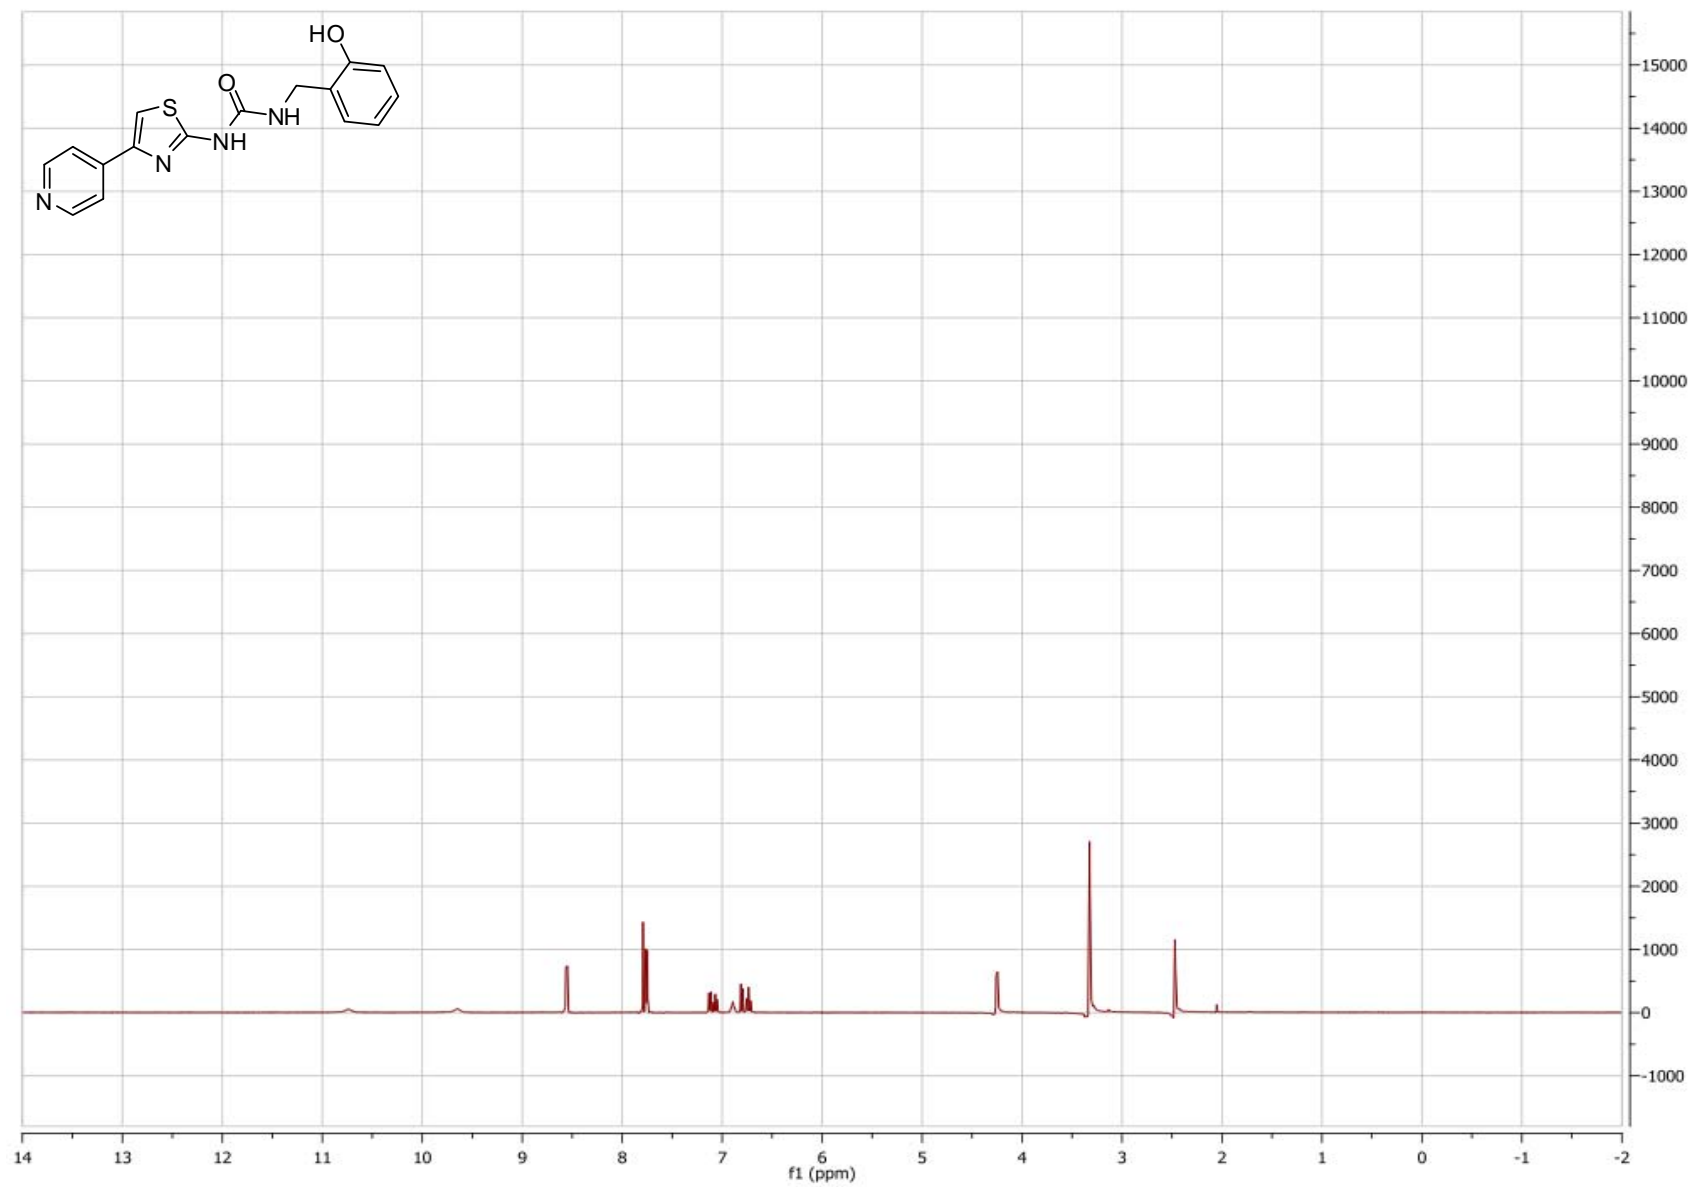



Expansion of the aromatic region of **5h**

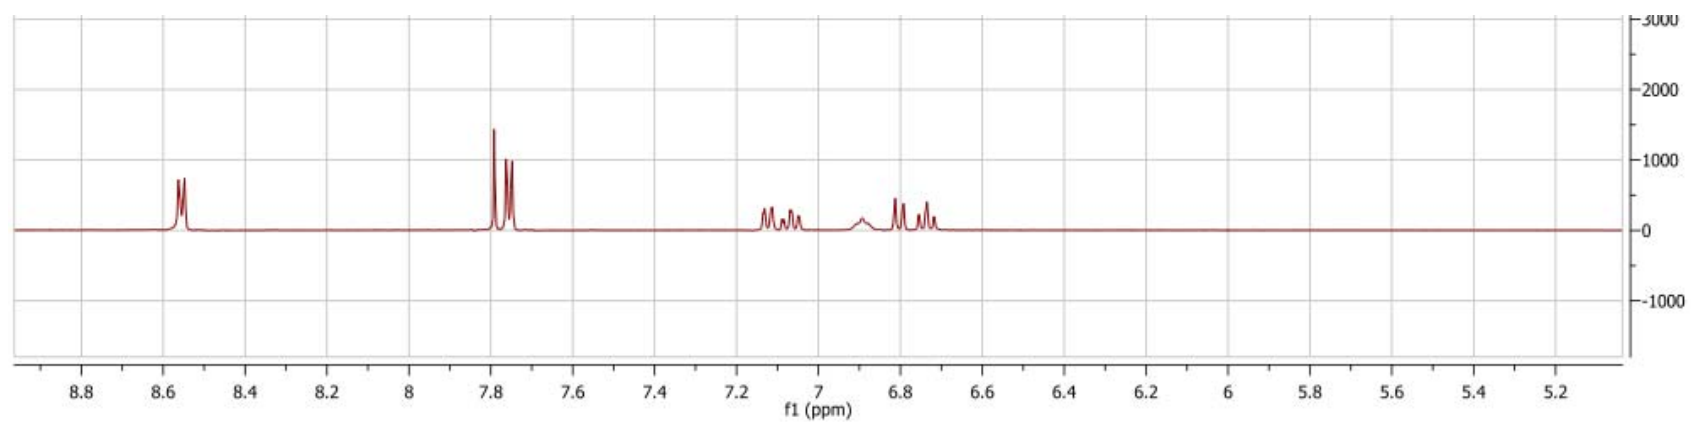

$^1\text{H}$  NMR (DMSO- $d_6$ ) spectrum of **5i**

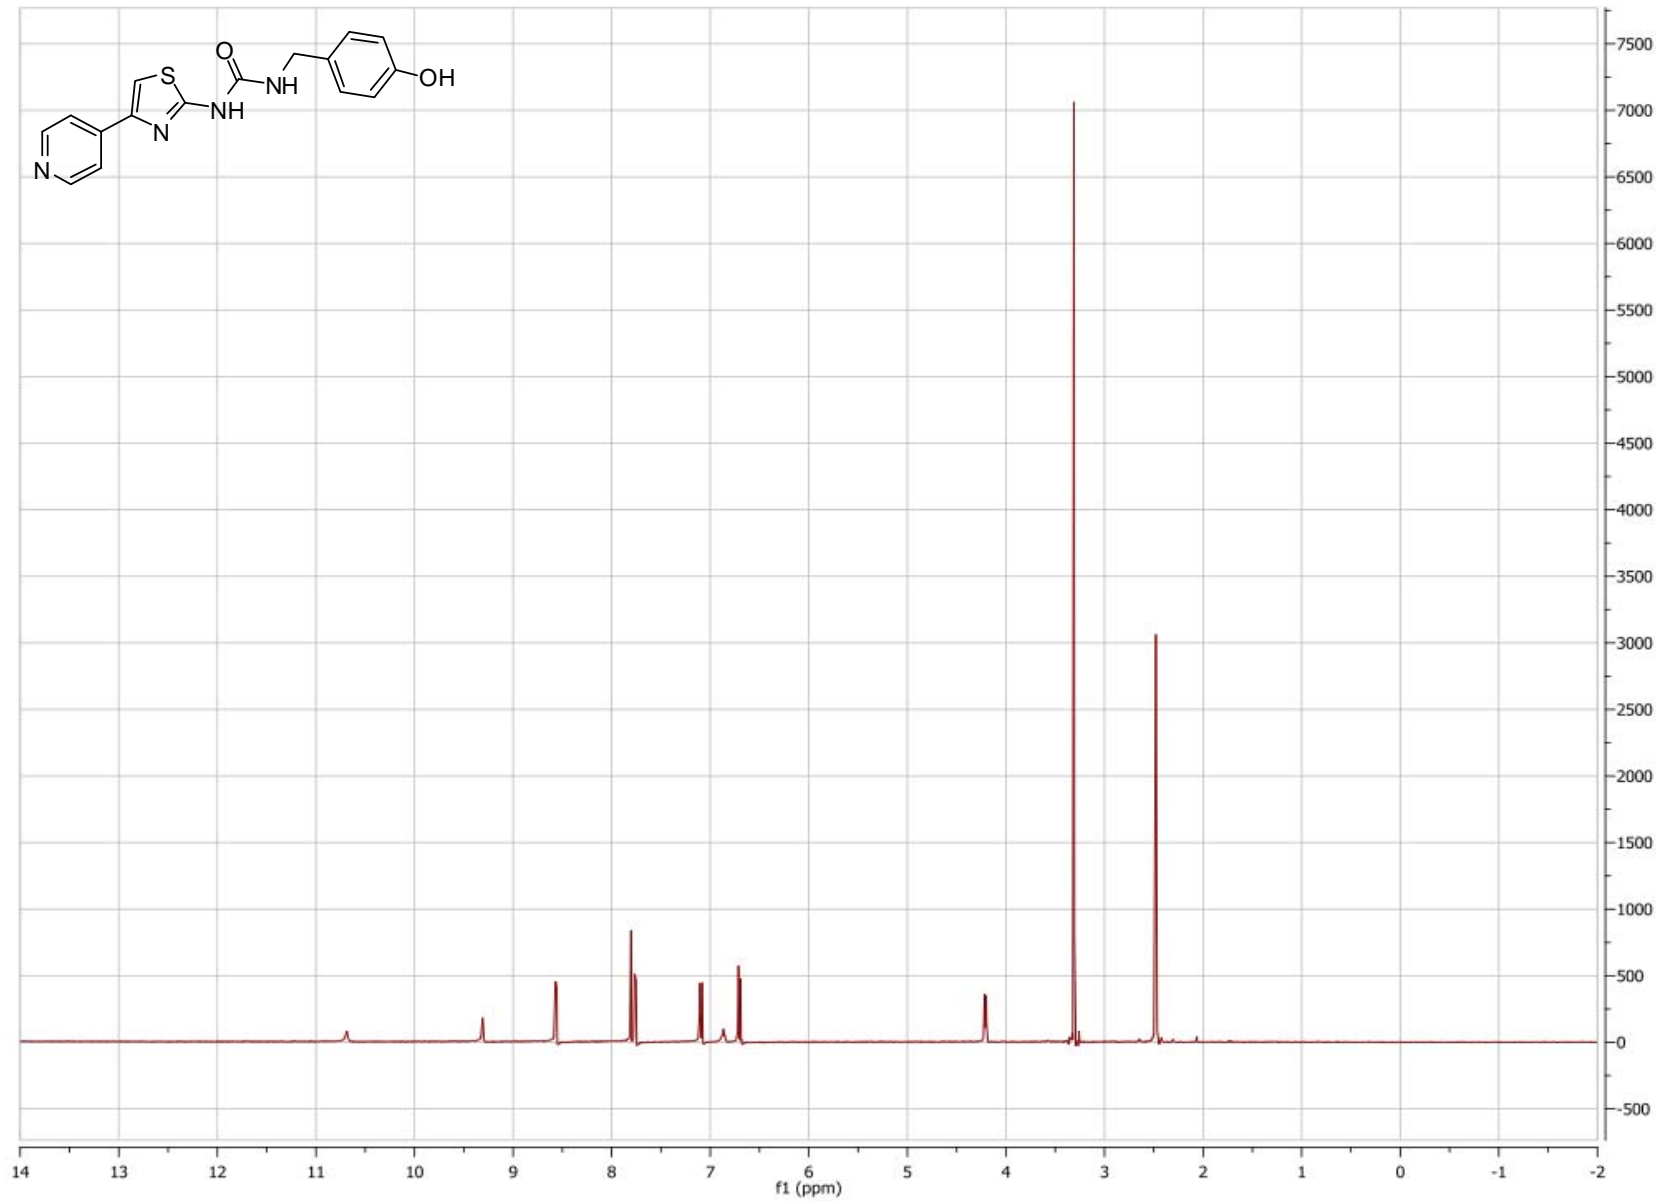

Expansion of the aromatic region of **5i**

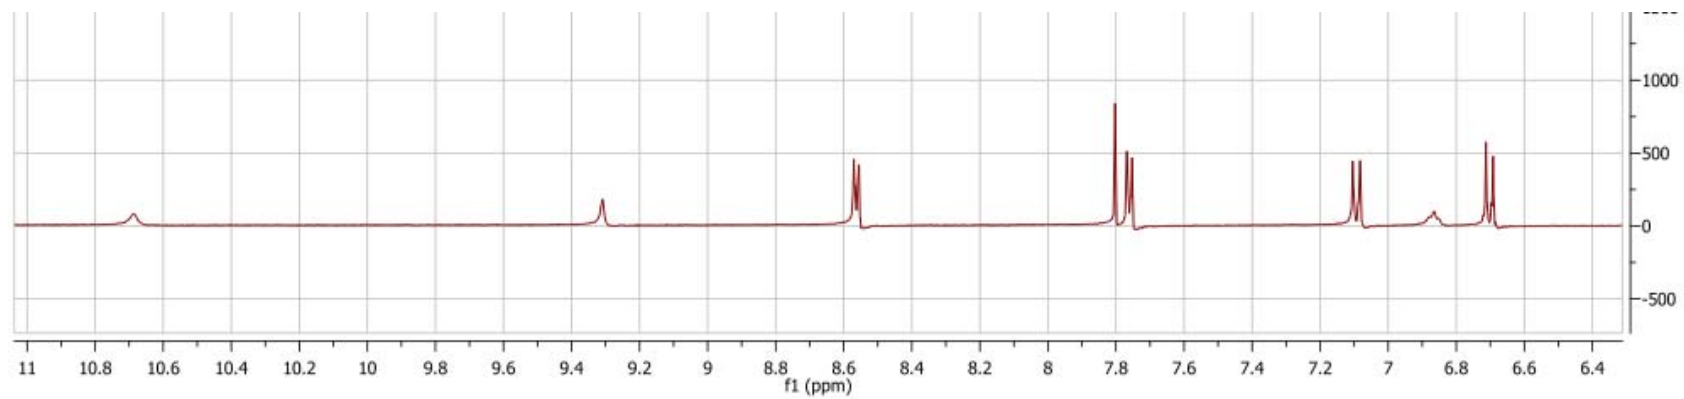

<sup>1</sup>H NMR (DMSO-d<sub>6</sub>) spectrum of **5j**

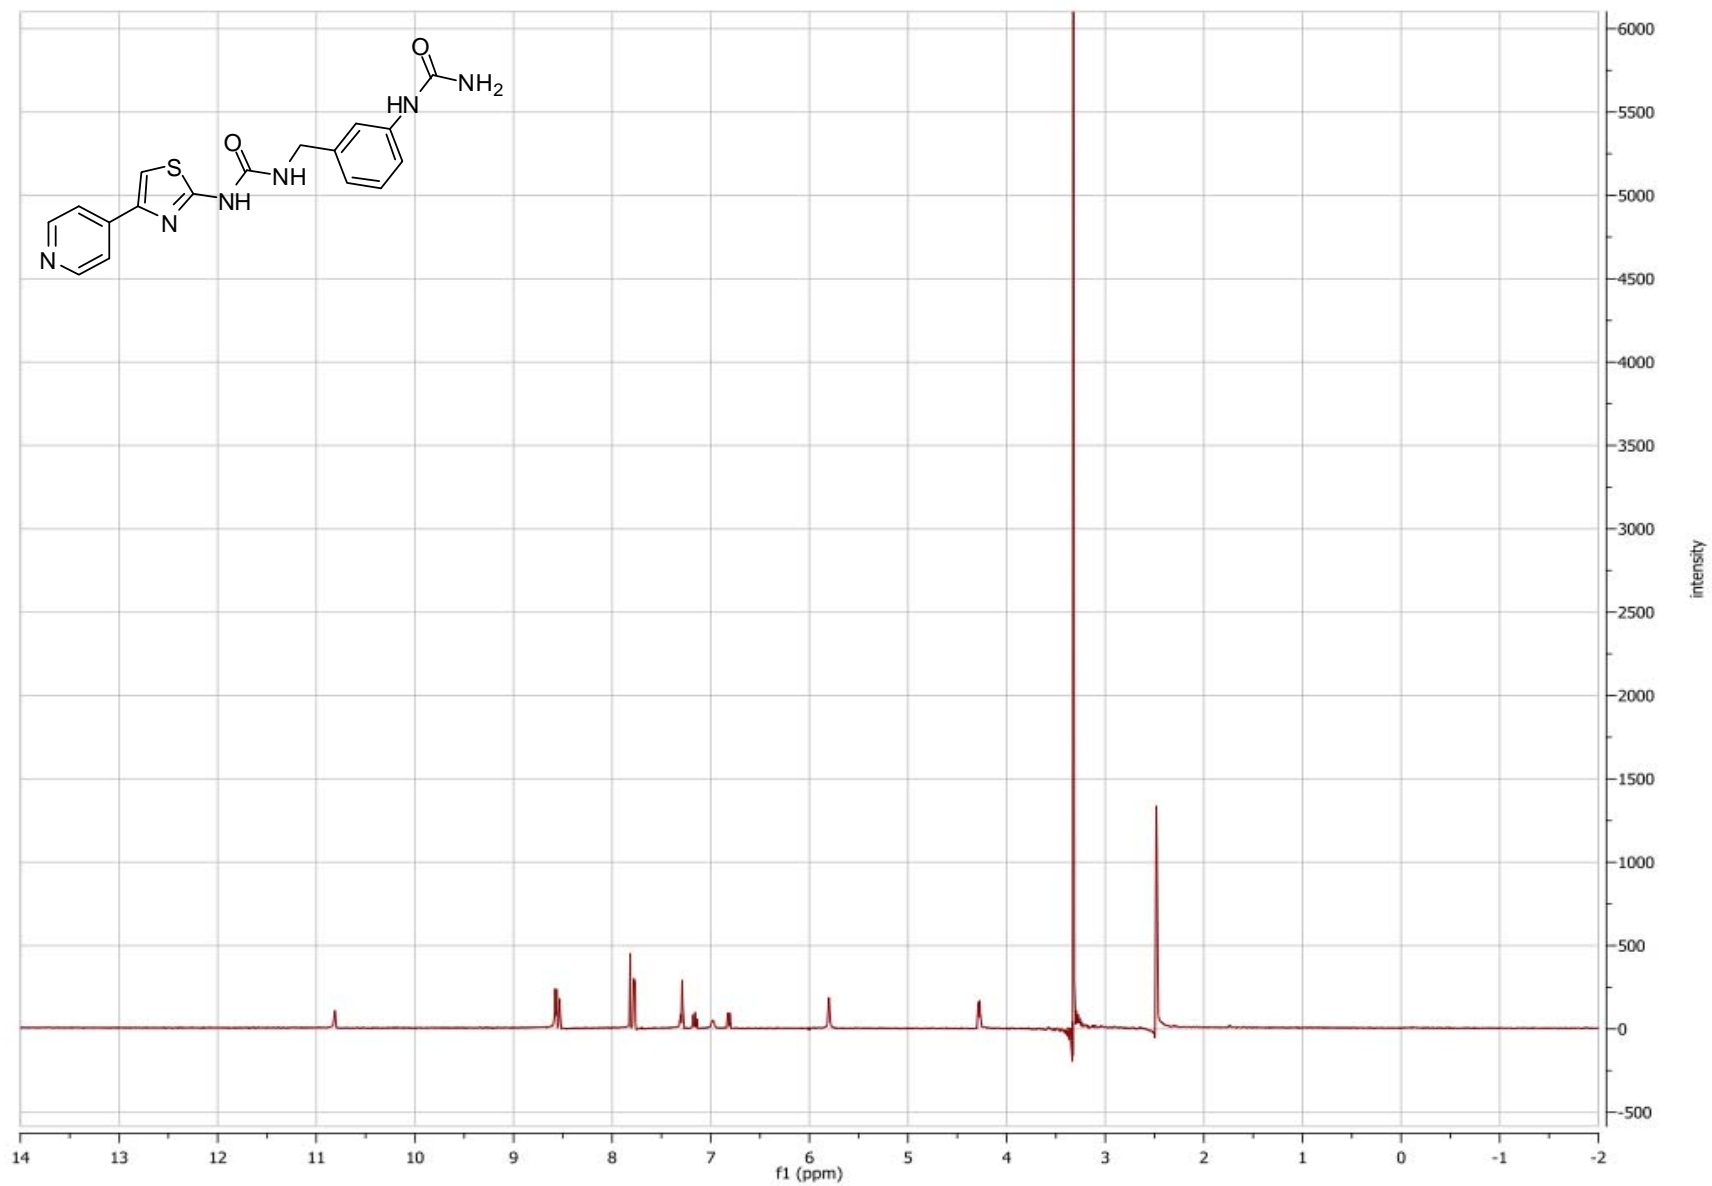

Expansion of the aromatic region of **5j**

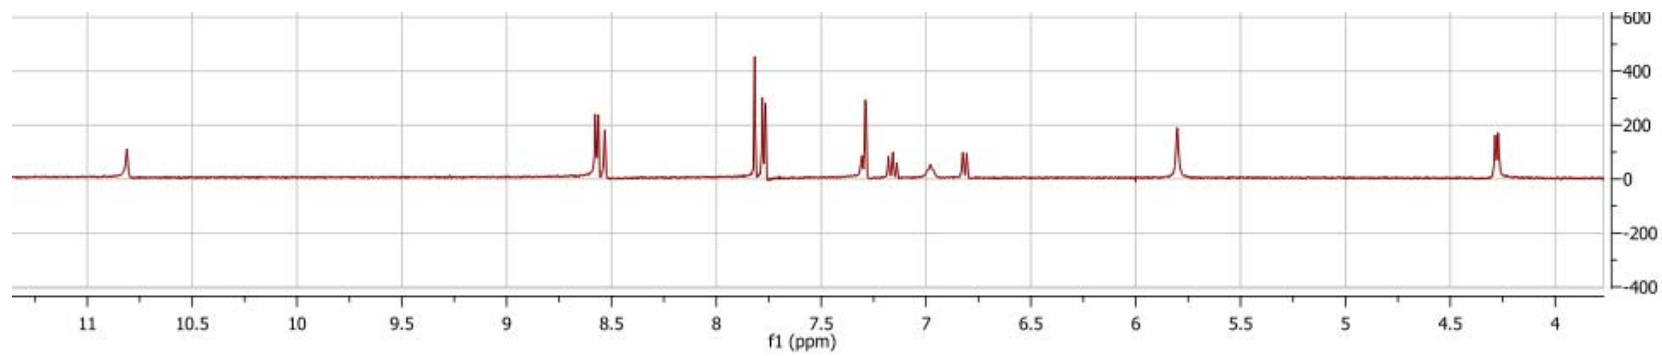

$^1\text{H}$  NMR (DMSO- $d_6$ ) spectrum of **5k**

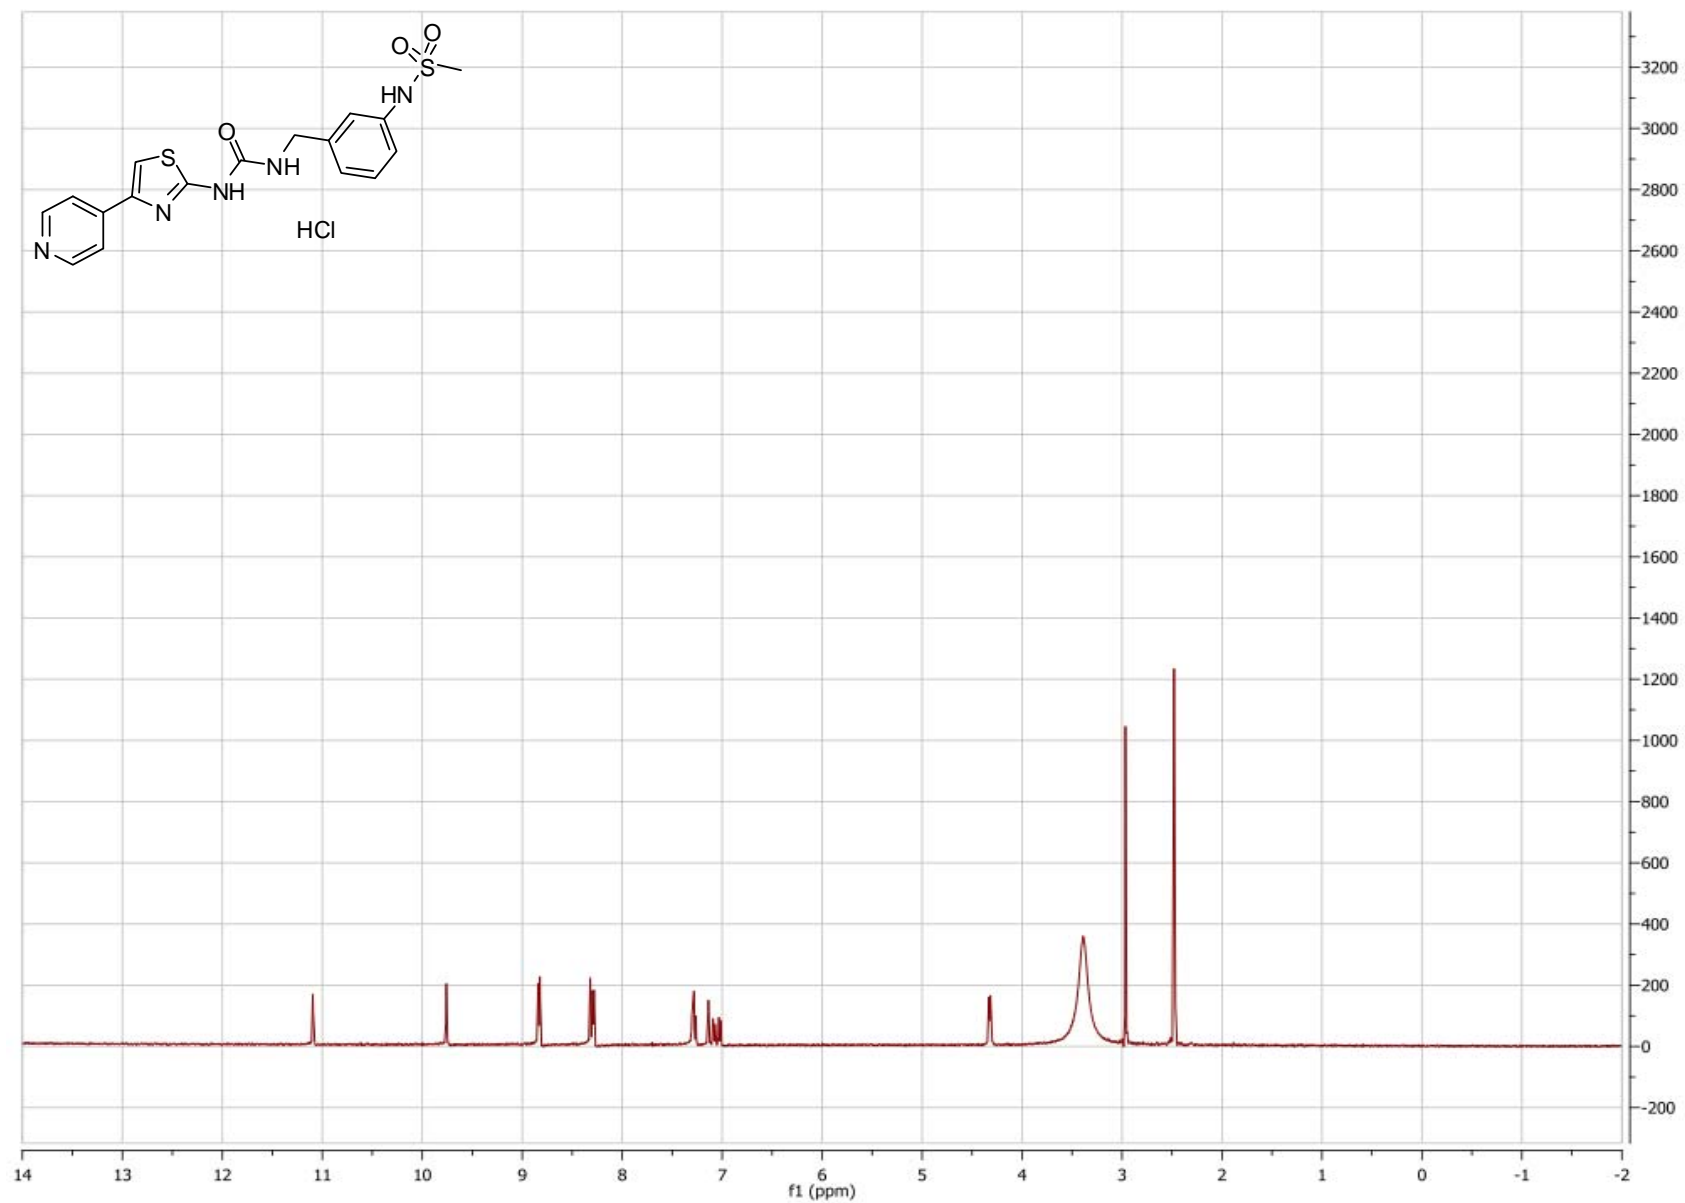

Expansion of the aromatic region of **5k**

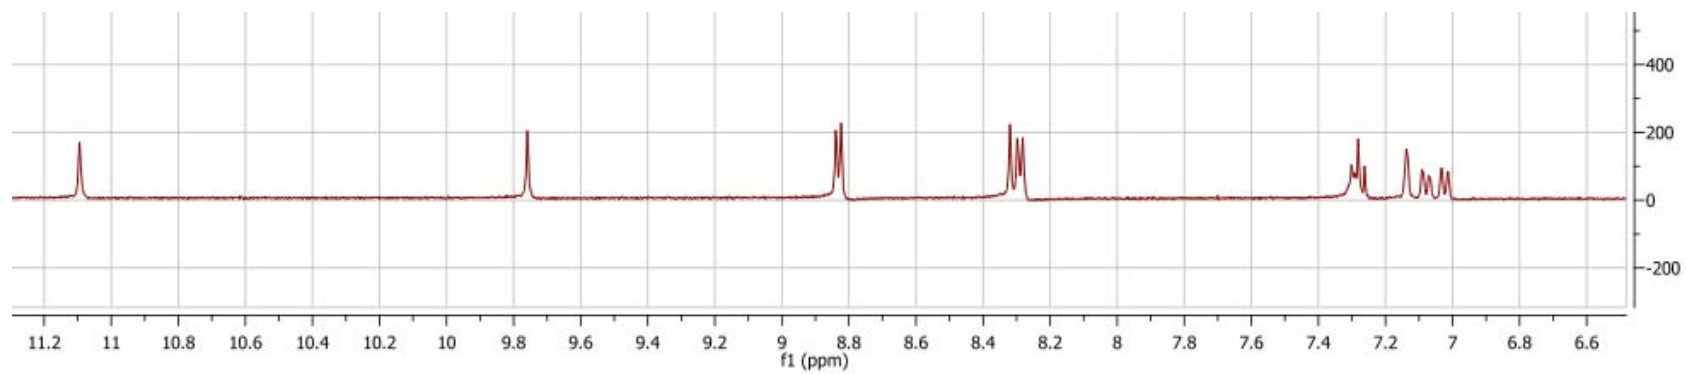

$^1\text{H}$  NMR (DMSO- $d_6$ ) spectrum of **51**

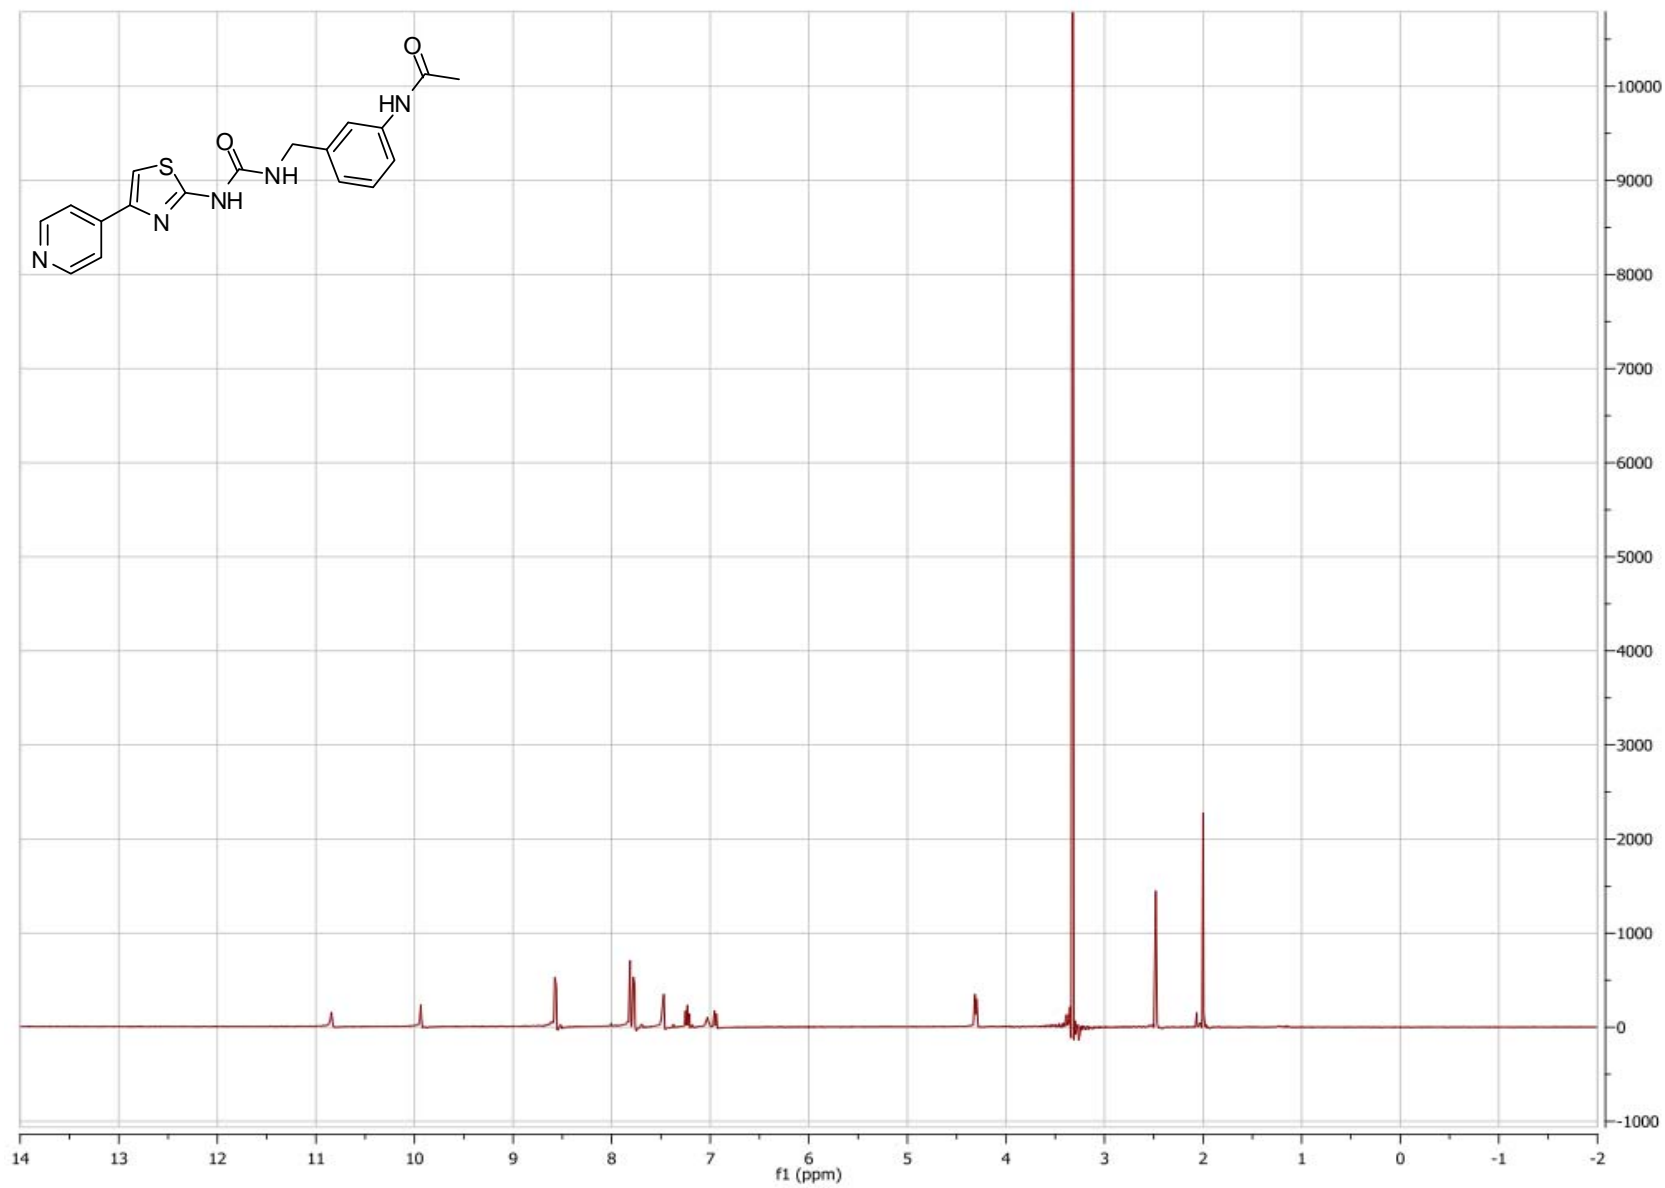



Expansion of the aromatic region of **51**

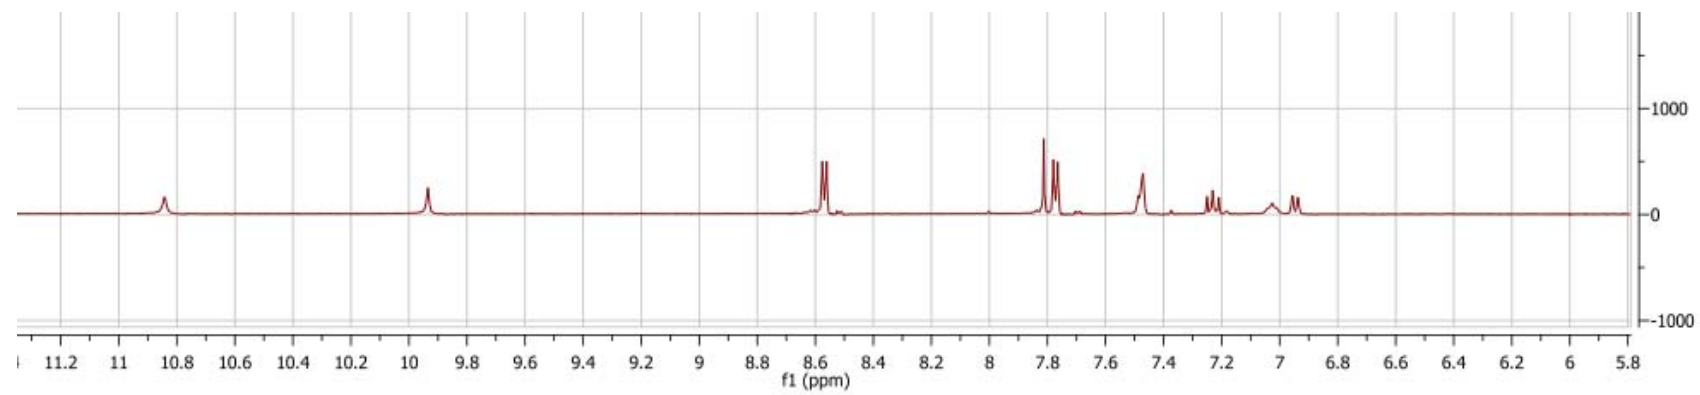

$^1\text{H}$  NMR (DMSO- $d_6$ ) spectrum of **5m**

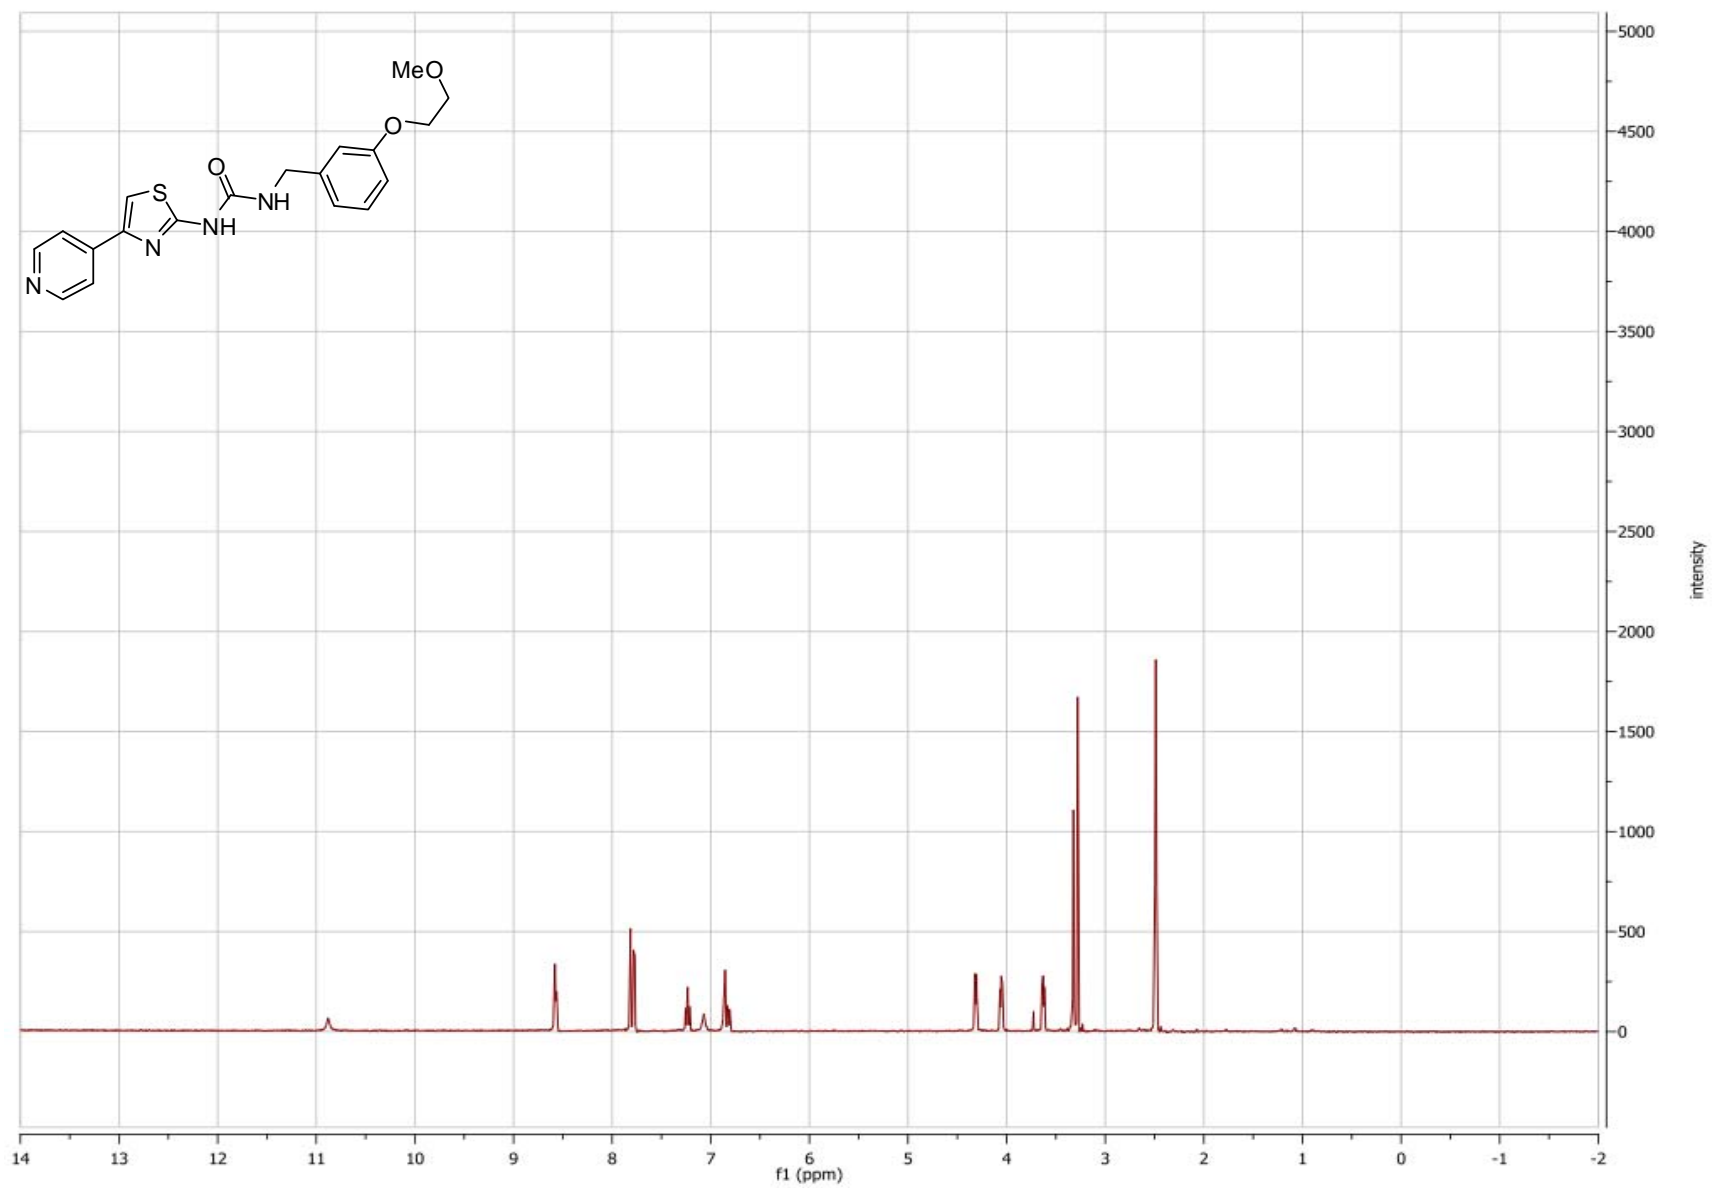

Expansion of the aromatic region of **5m**

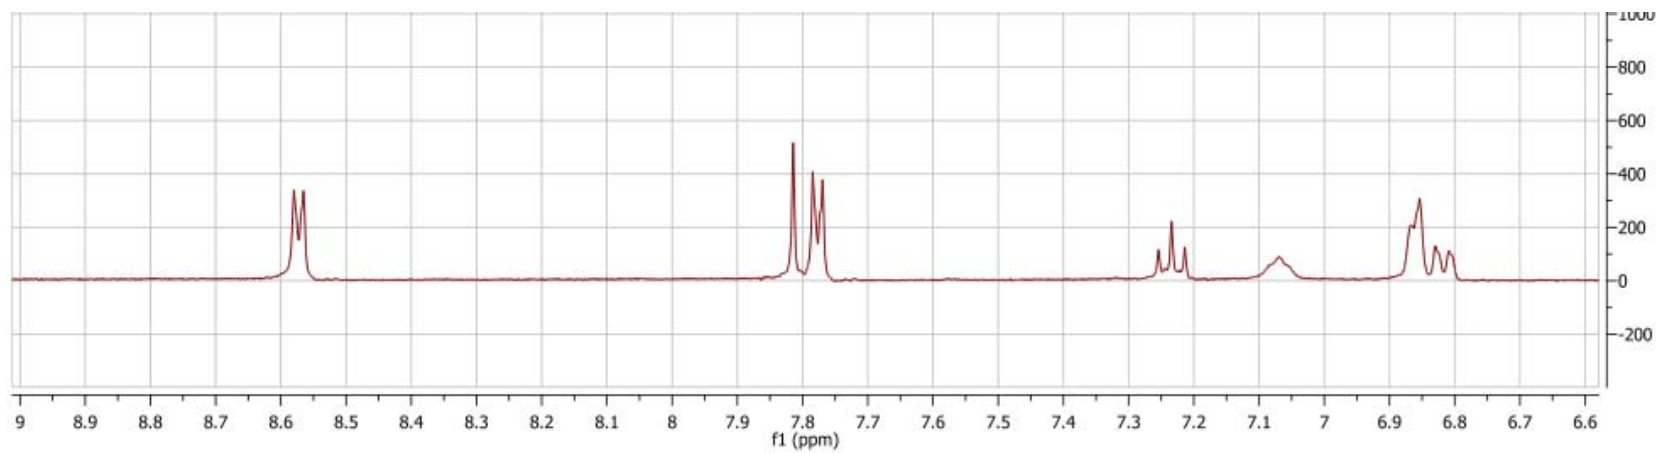

$^1\text{H}$  NMR (DMSO- $d_6$ ) spectrum of **5n**

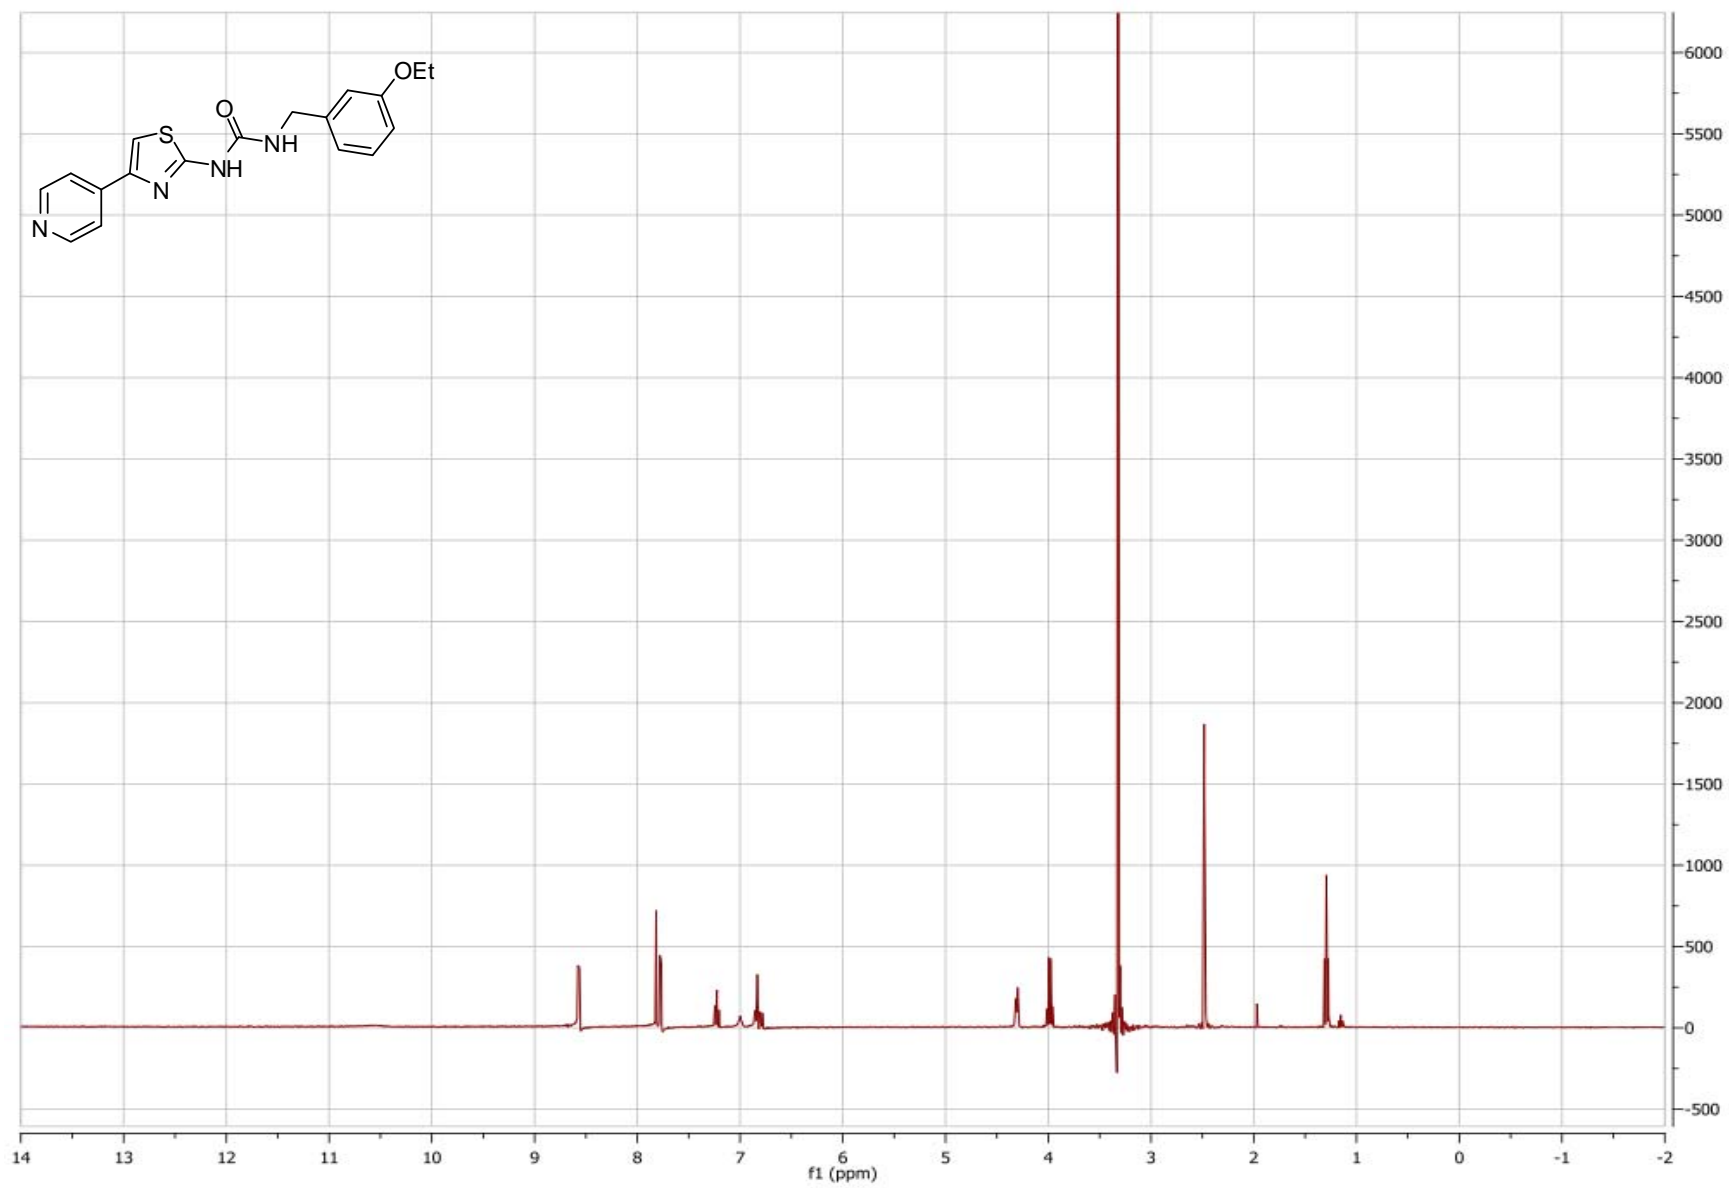

Expansion of the aromatic region of **5n**

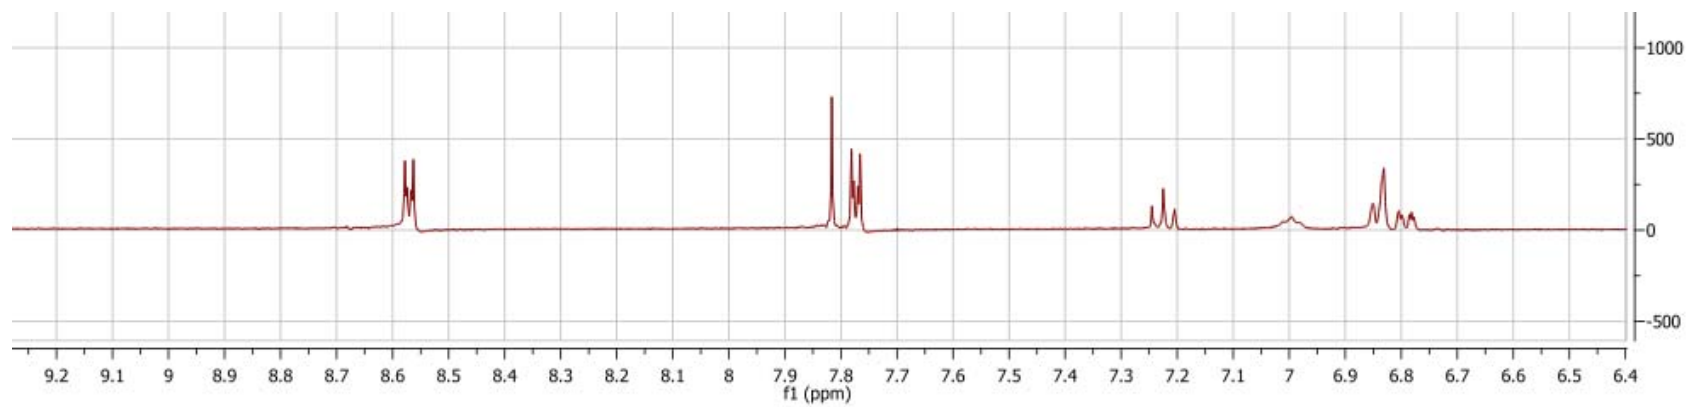

$^1\text{H}$  NMR (DMSO- $d_6$ ) spectrum of **5o**

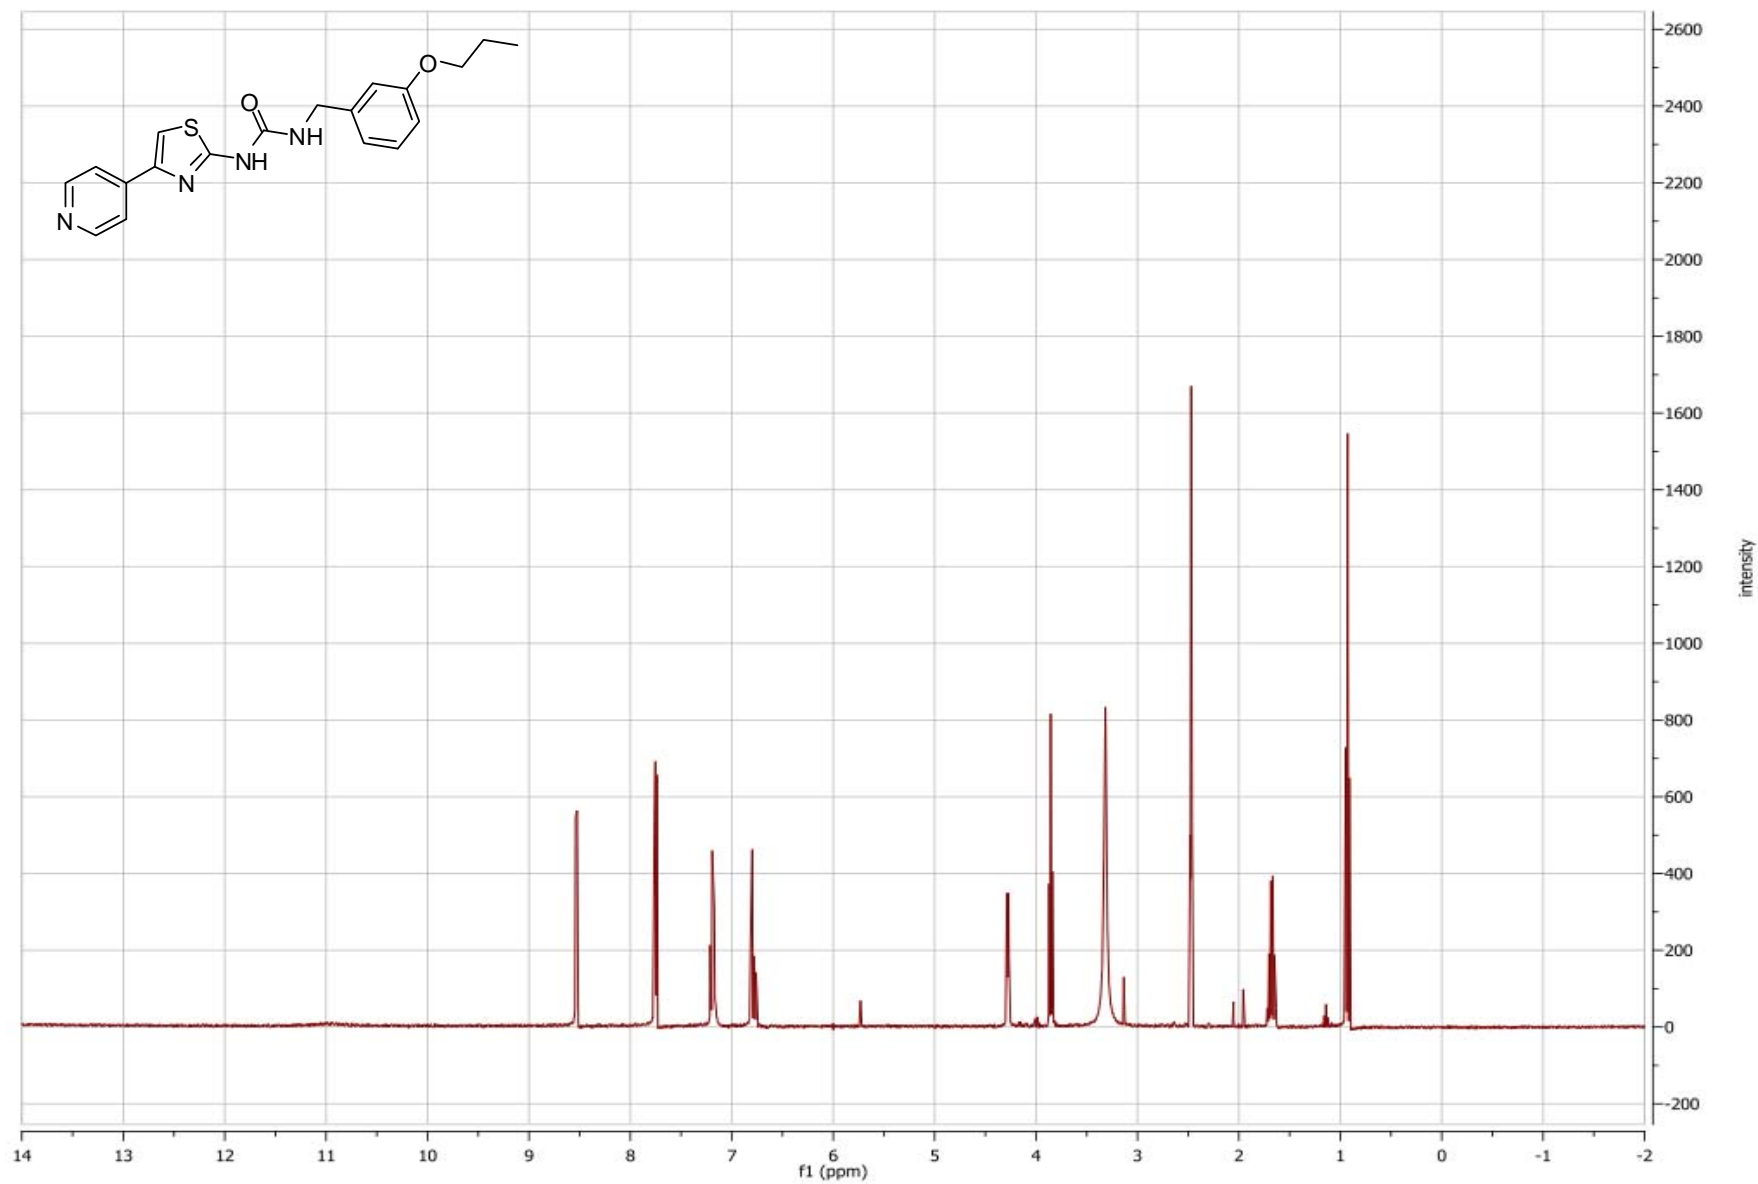

Expansion of the aromatic region of **5o**

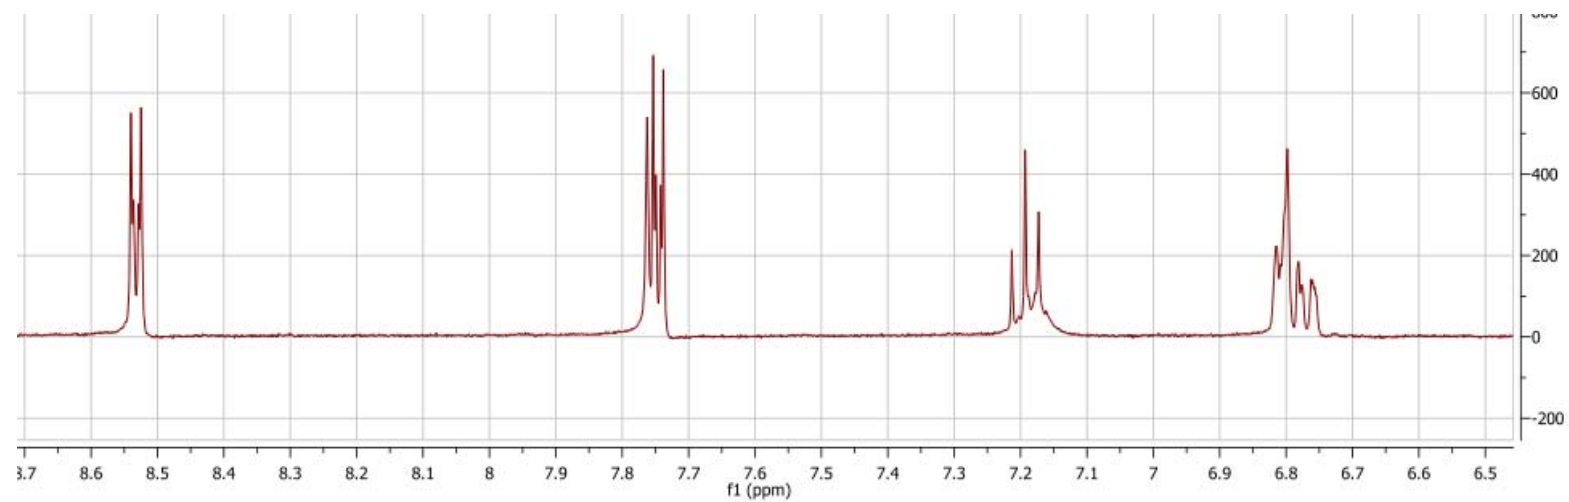

$^1\text{H}$  NMR (DMSO- $d_6$ ) spectrum of **5p**

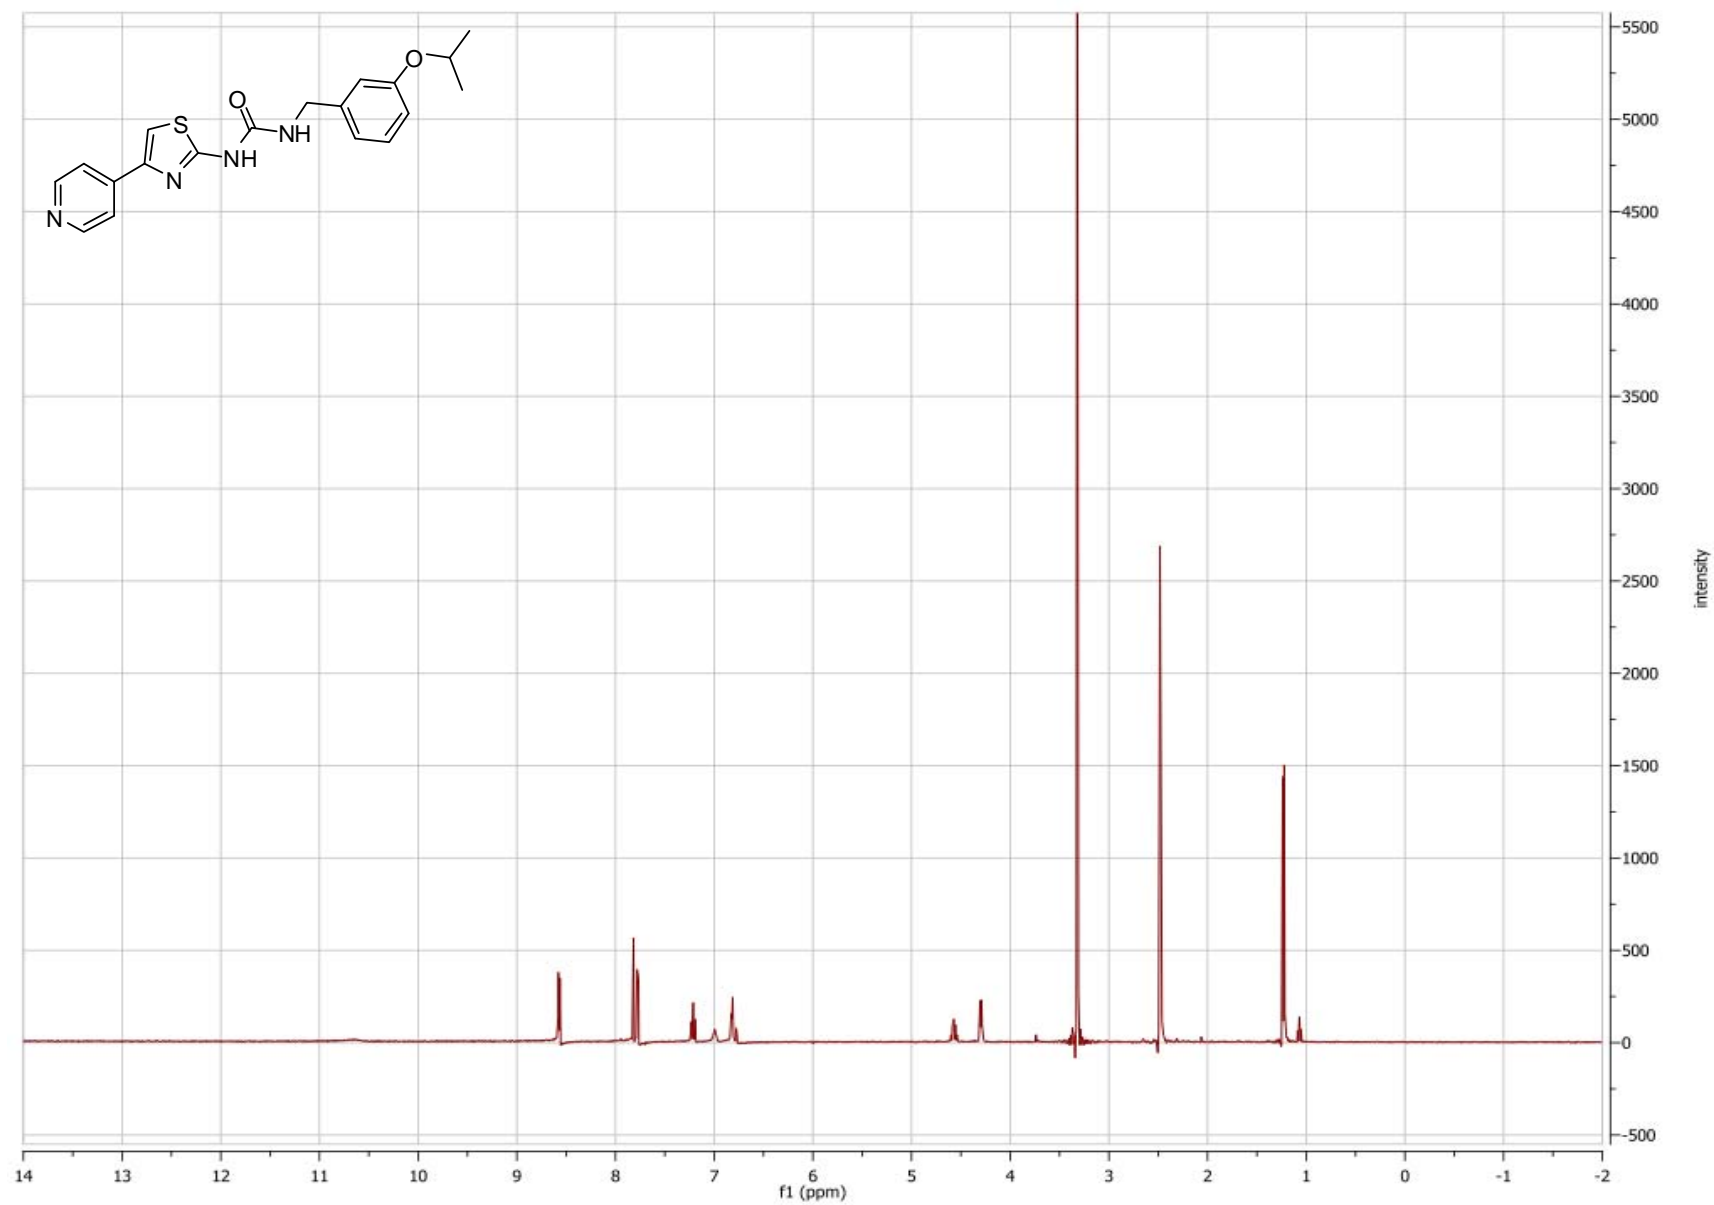



Expansion of the aromatic region of **5p**

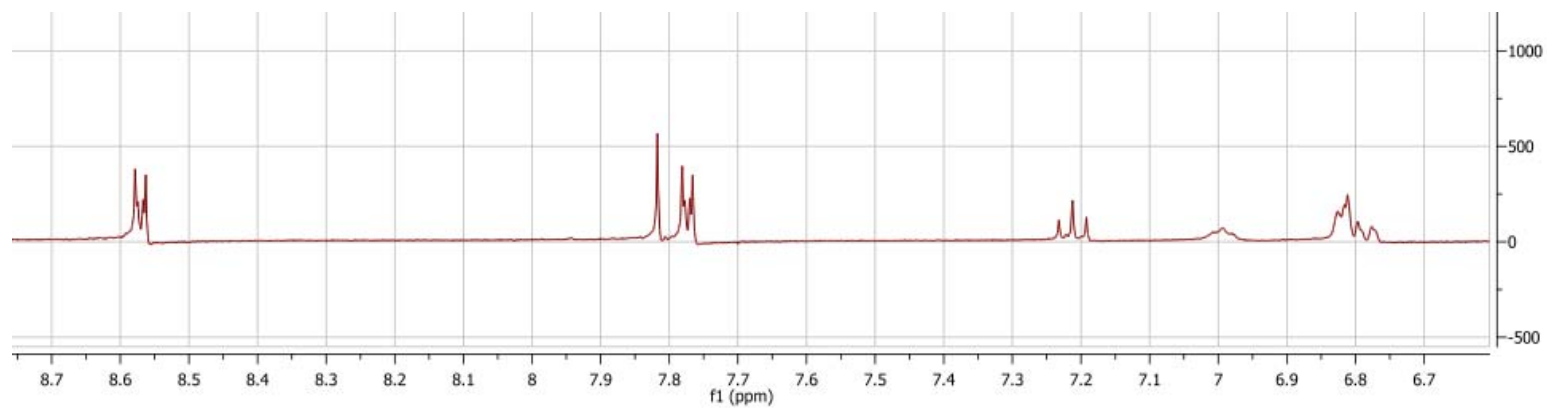

$^1\text{H}$  NMR (DMSO- $d_6$ ) spectrum of **5t**

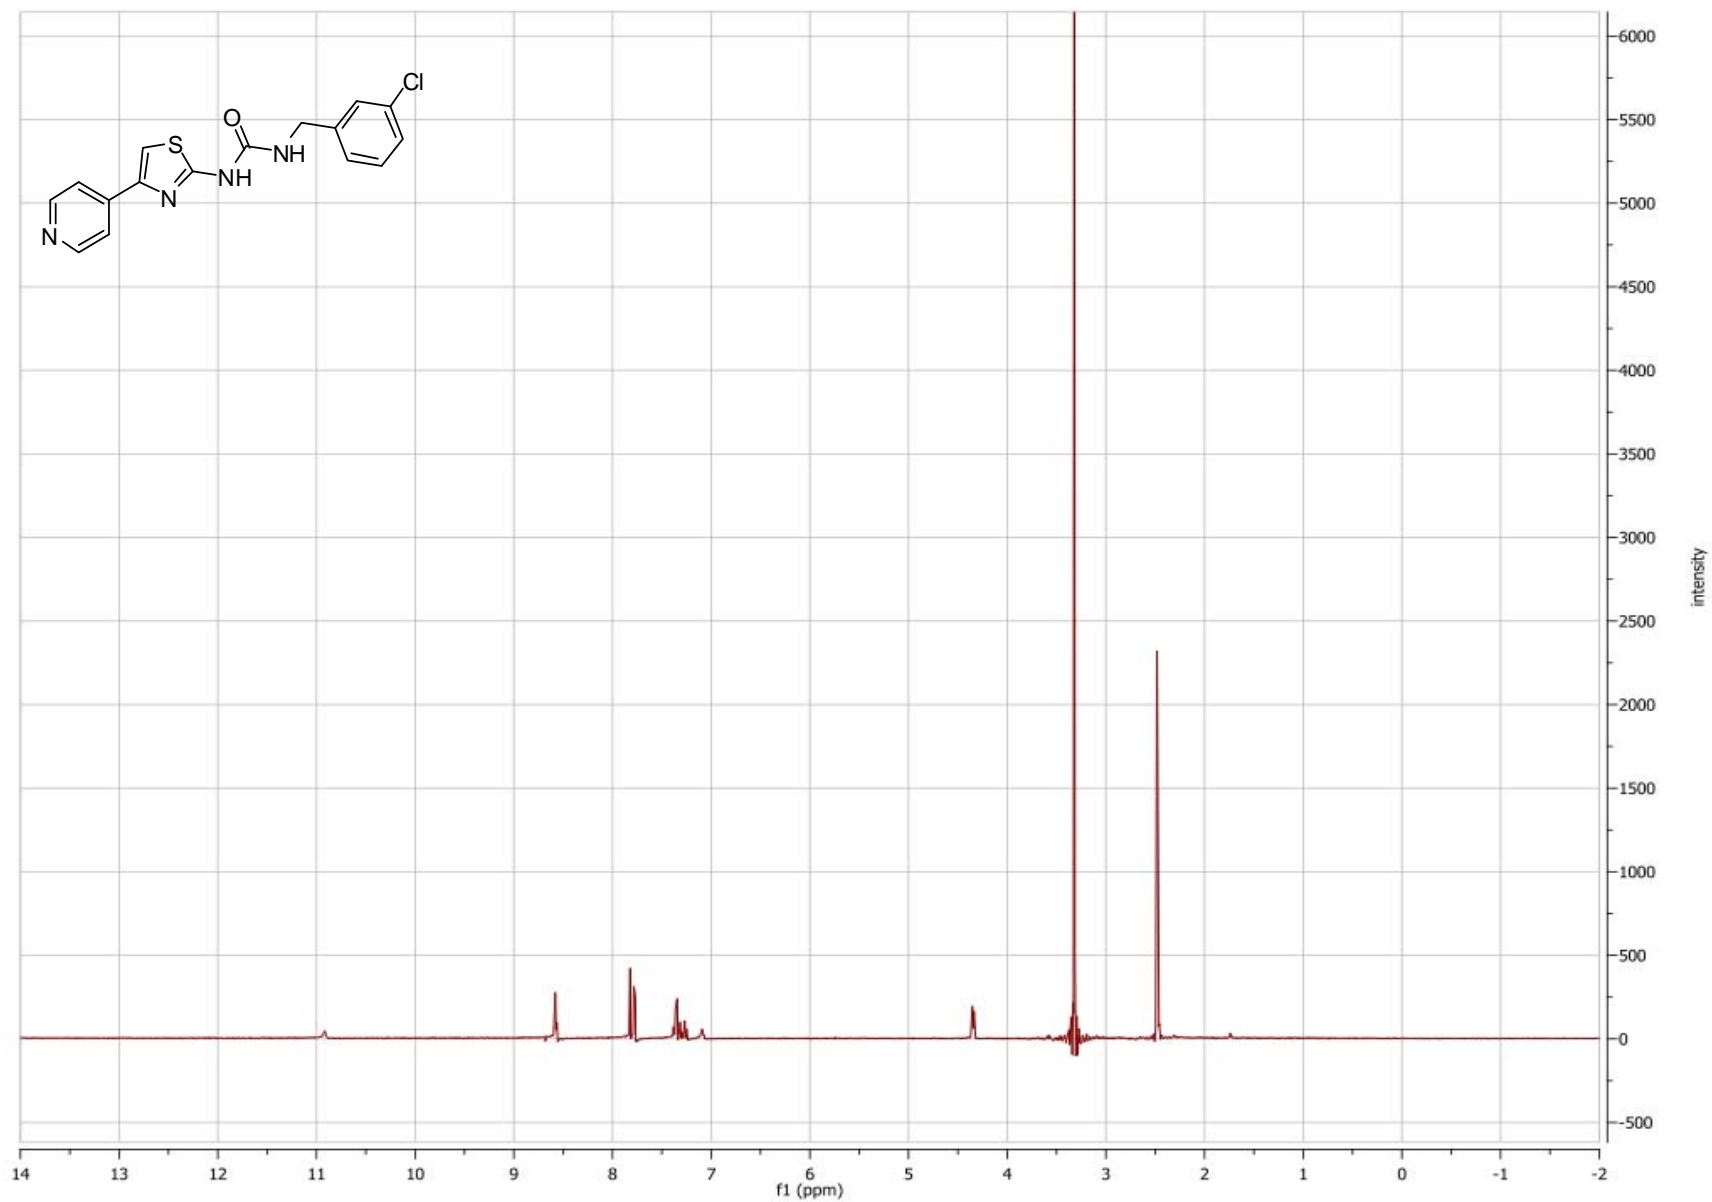

Expansion of the aromatic region of **5p**

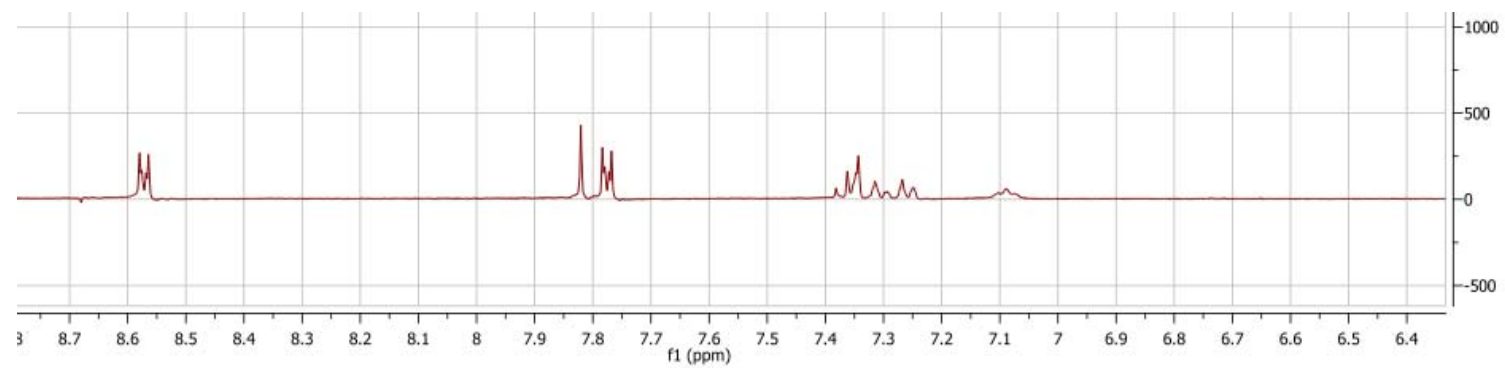

$^1\text{H}$  NMR (DMSO- $d_6$ ) spectrum of **5v**

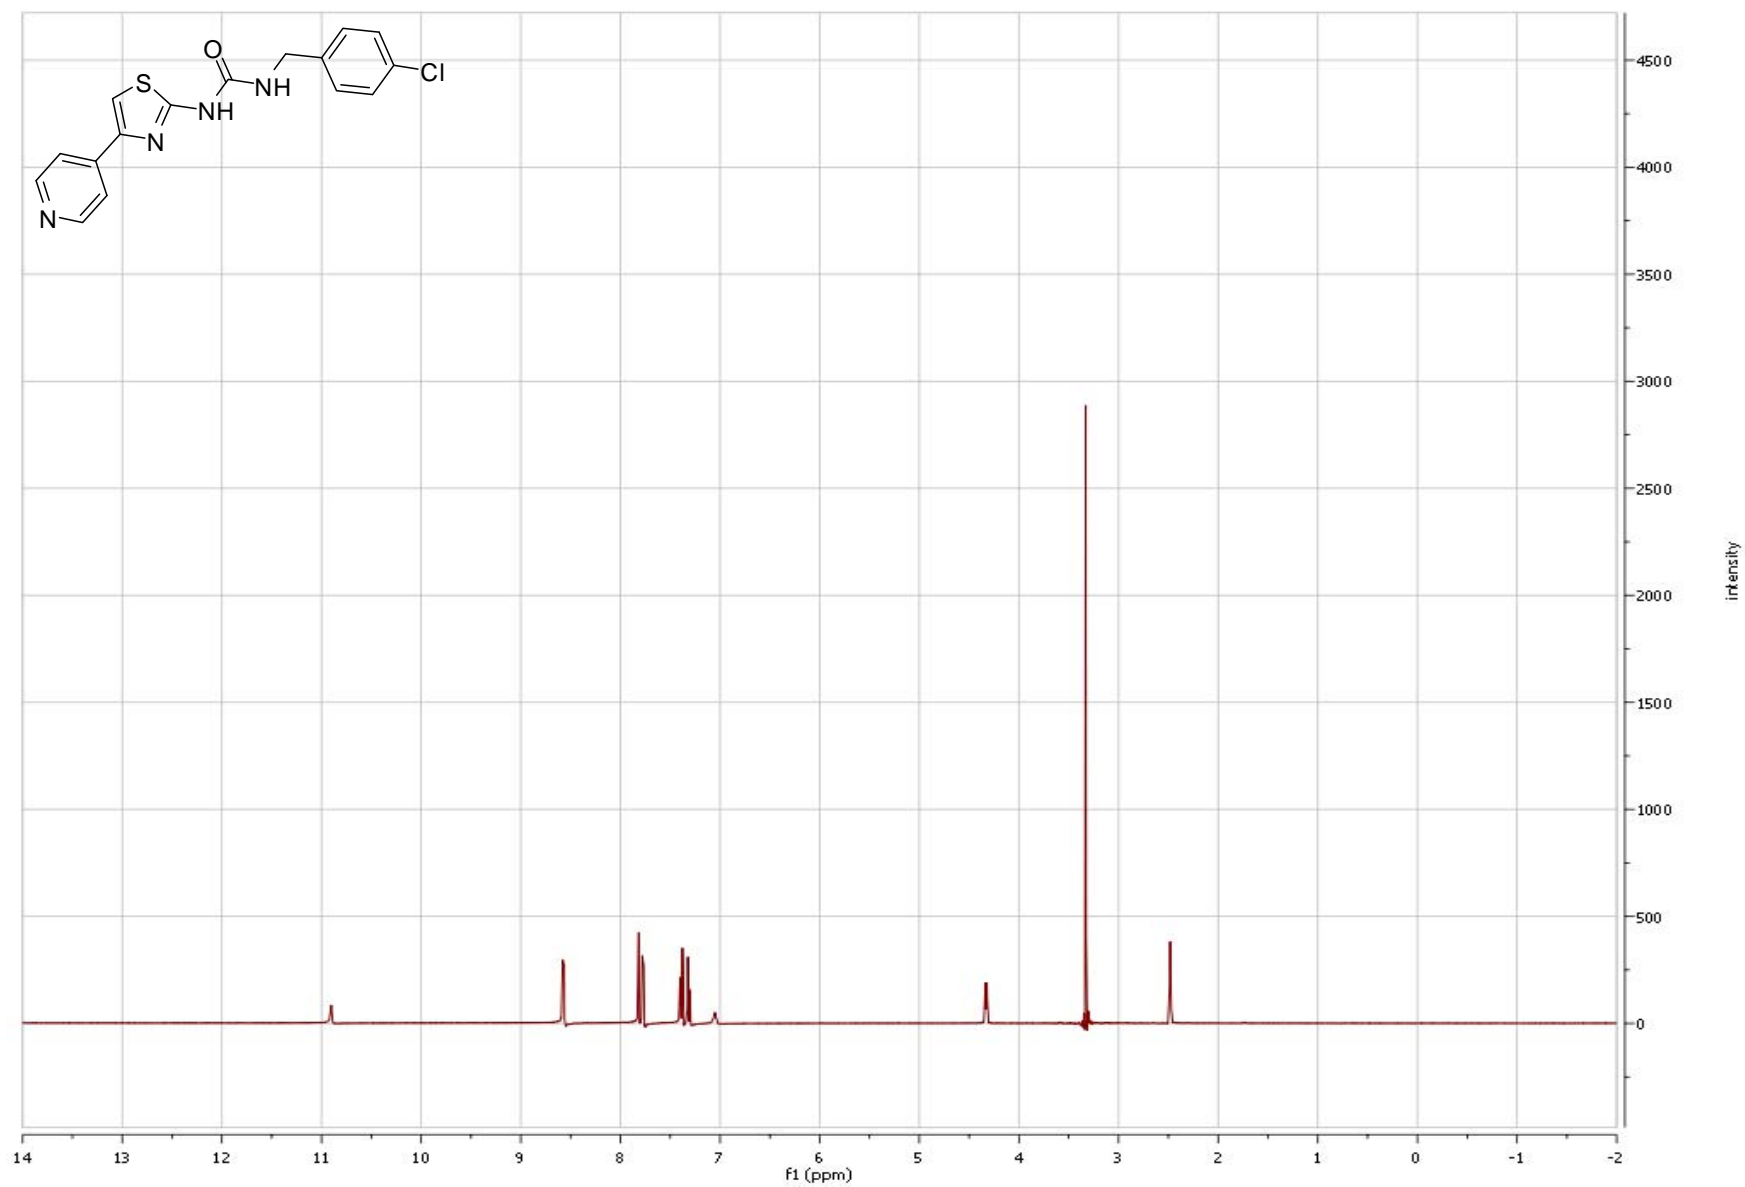

Expansion of the aromatic region of **5v**

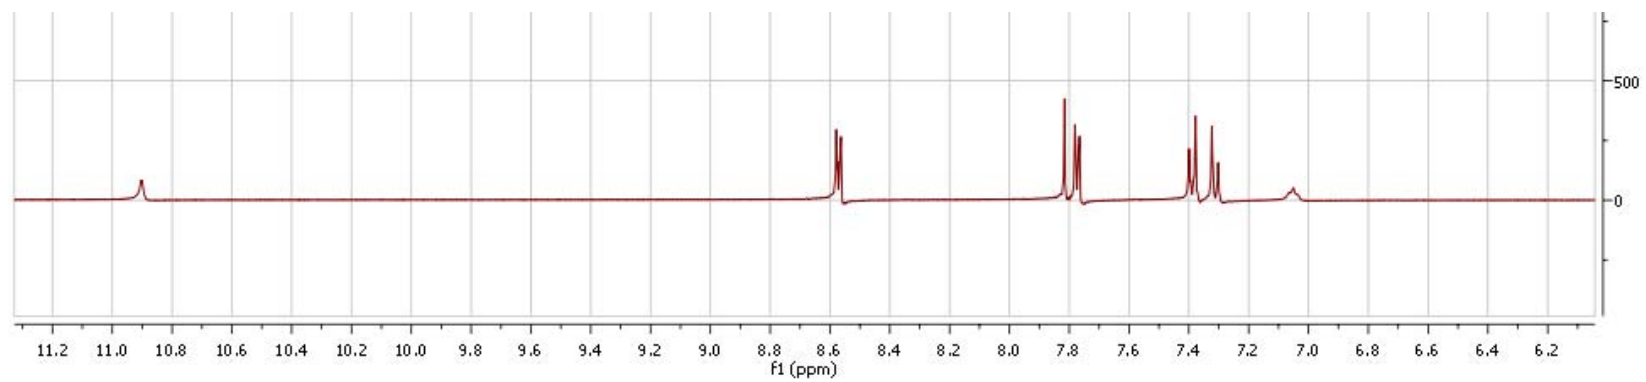

$^1\text{H}$  NMR (DMSO- $d_6$ ) spectrum of **5w**

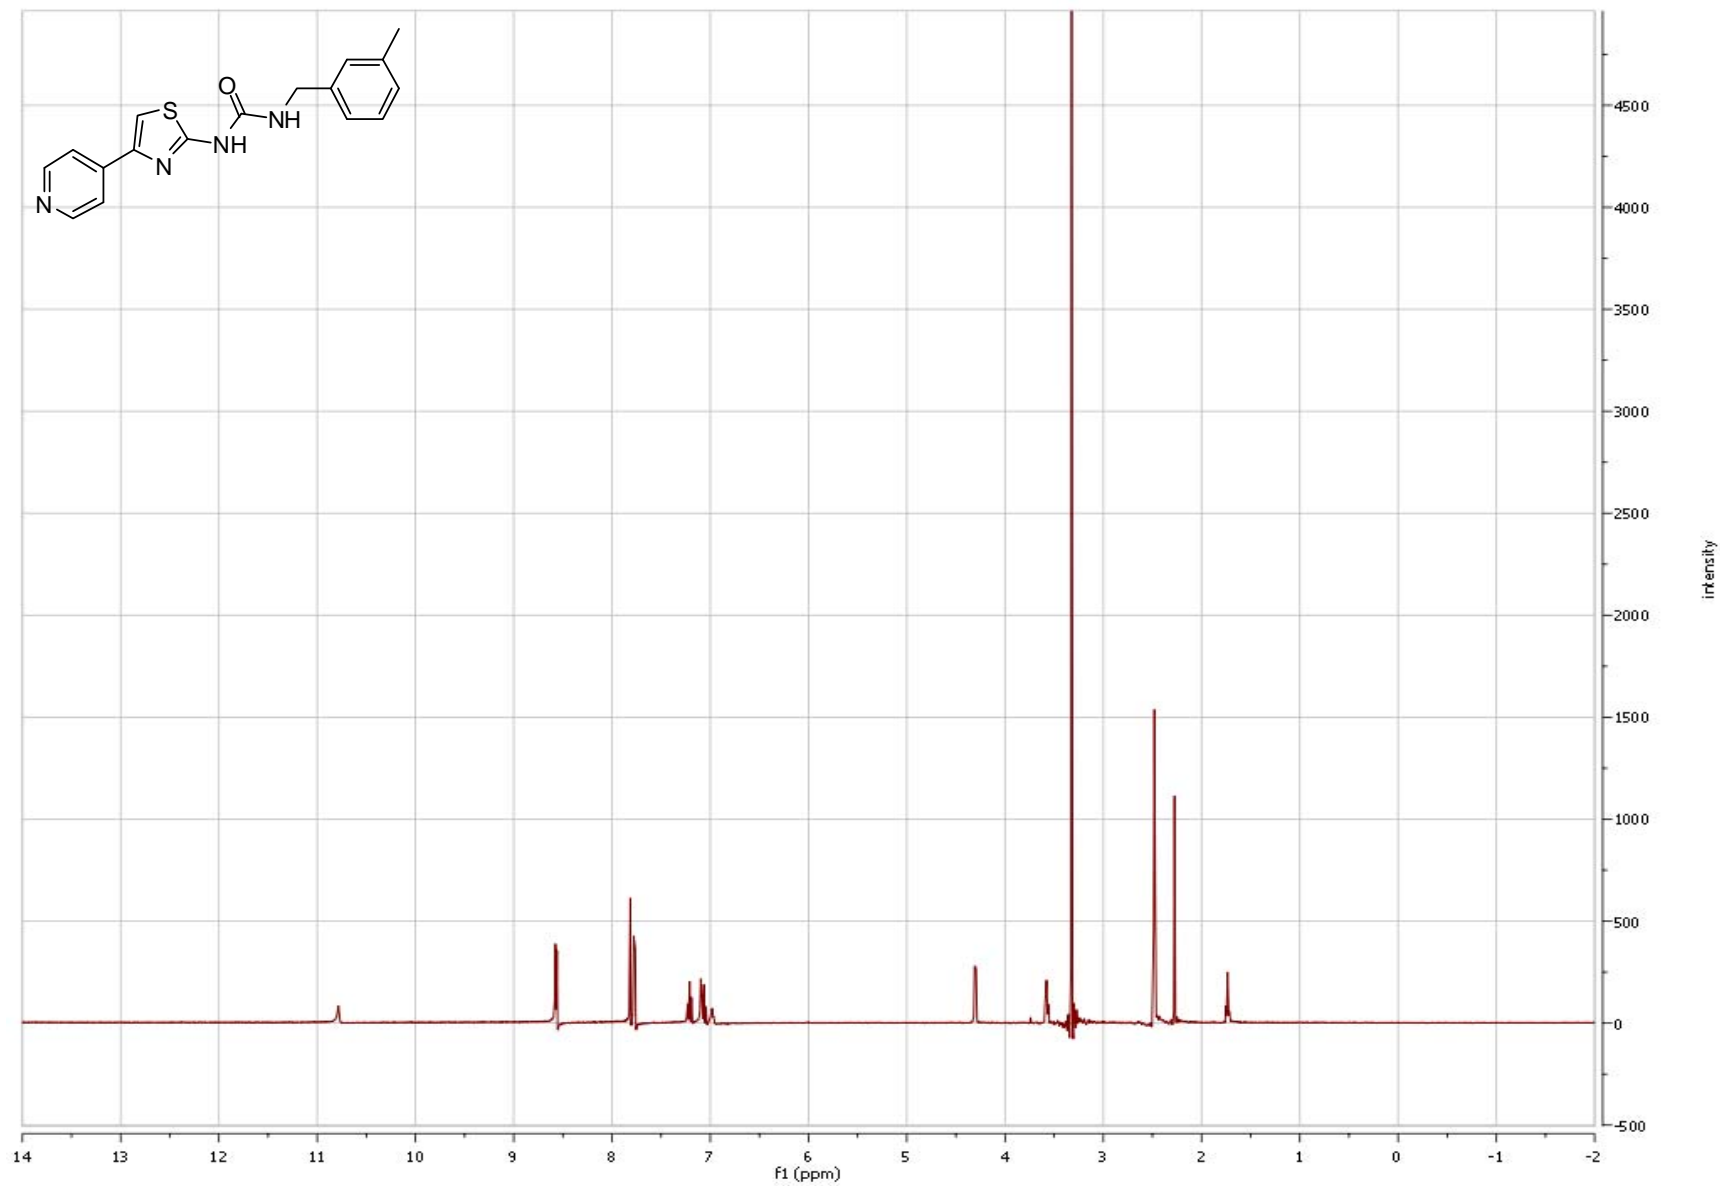

Expansion of the aromatic region of **5w**

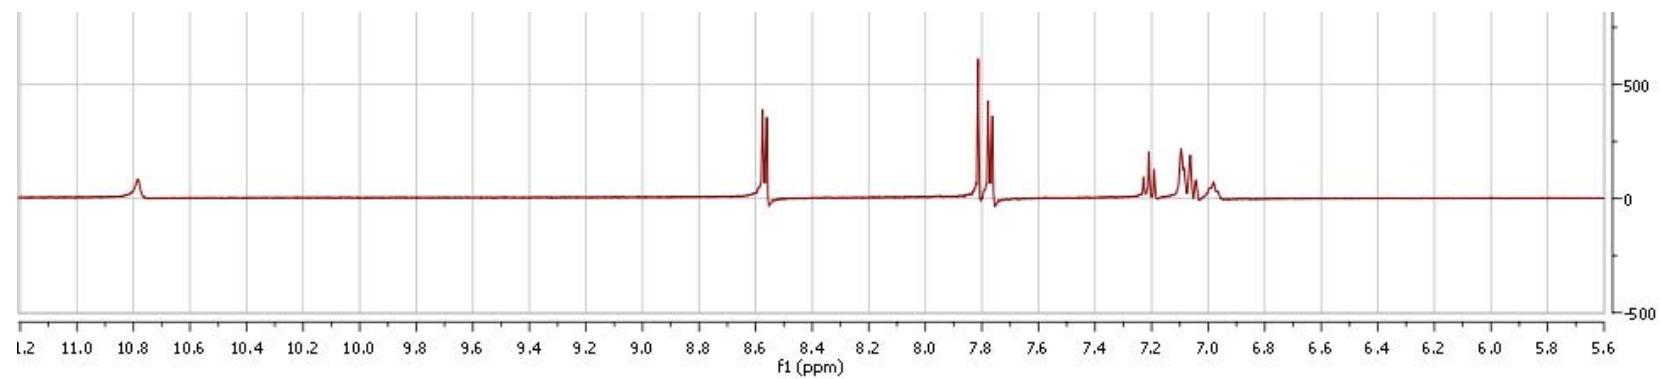

$^1\text{H}$  NMR (DMSO- $d_6$ ) spectrum of **5x**

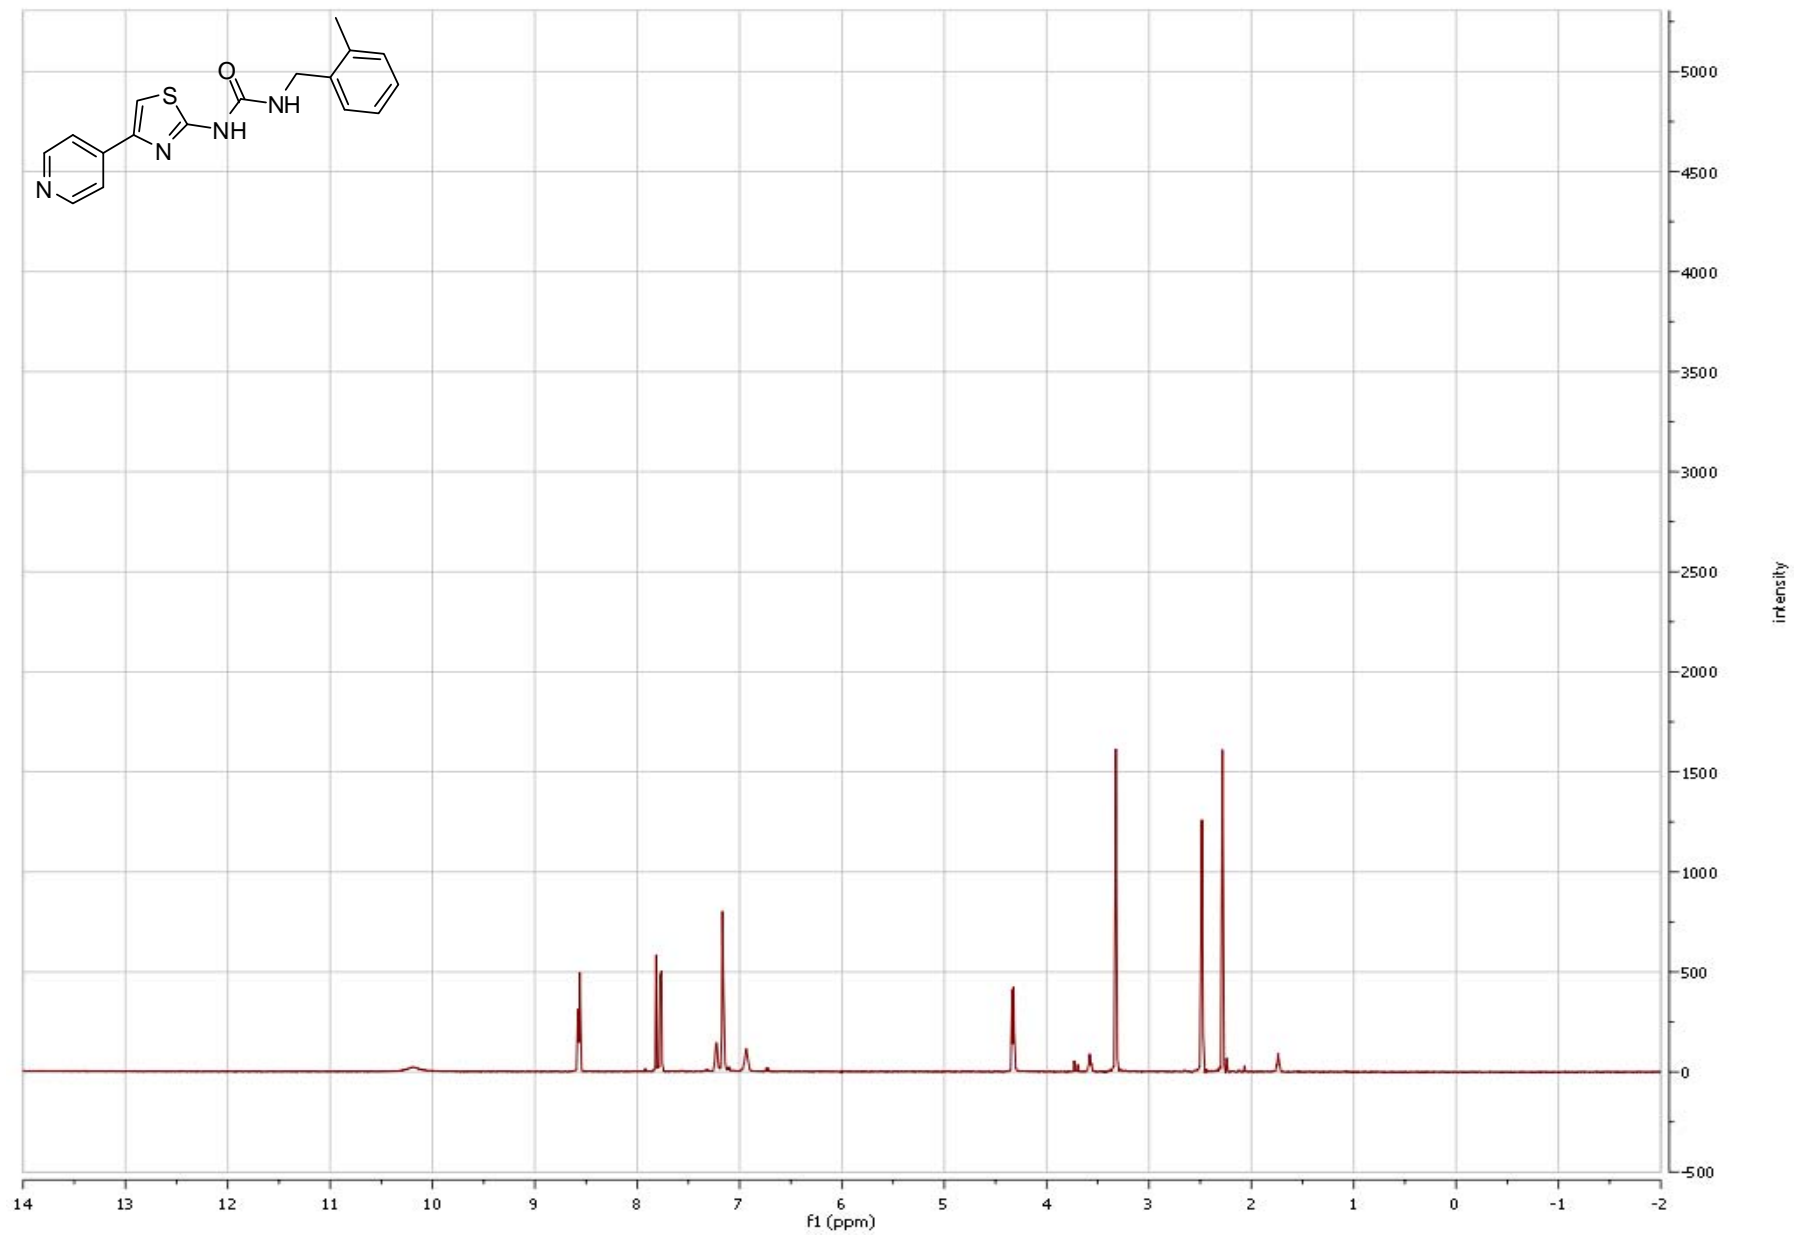



Expansion of the aromatic region of **5x**

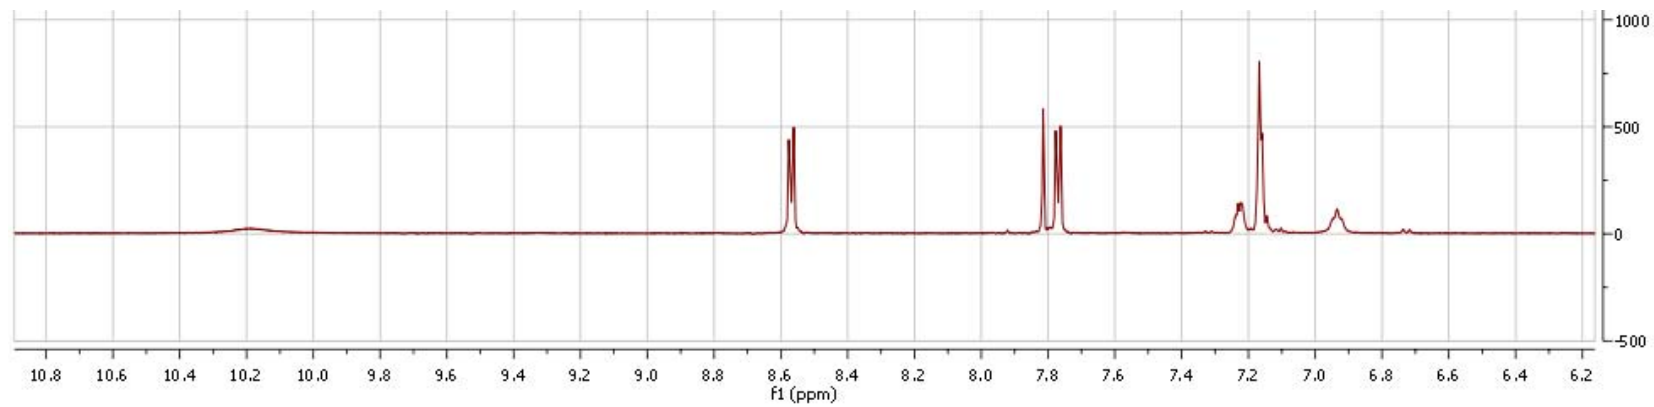

$^1\text{H}$  NMR (DMSO- $d_6$ ) spectrum of **5y**

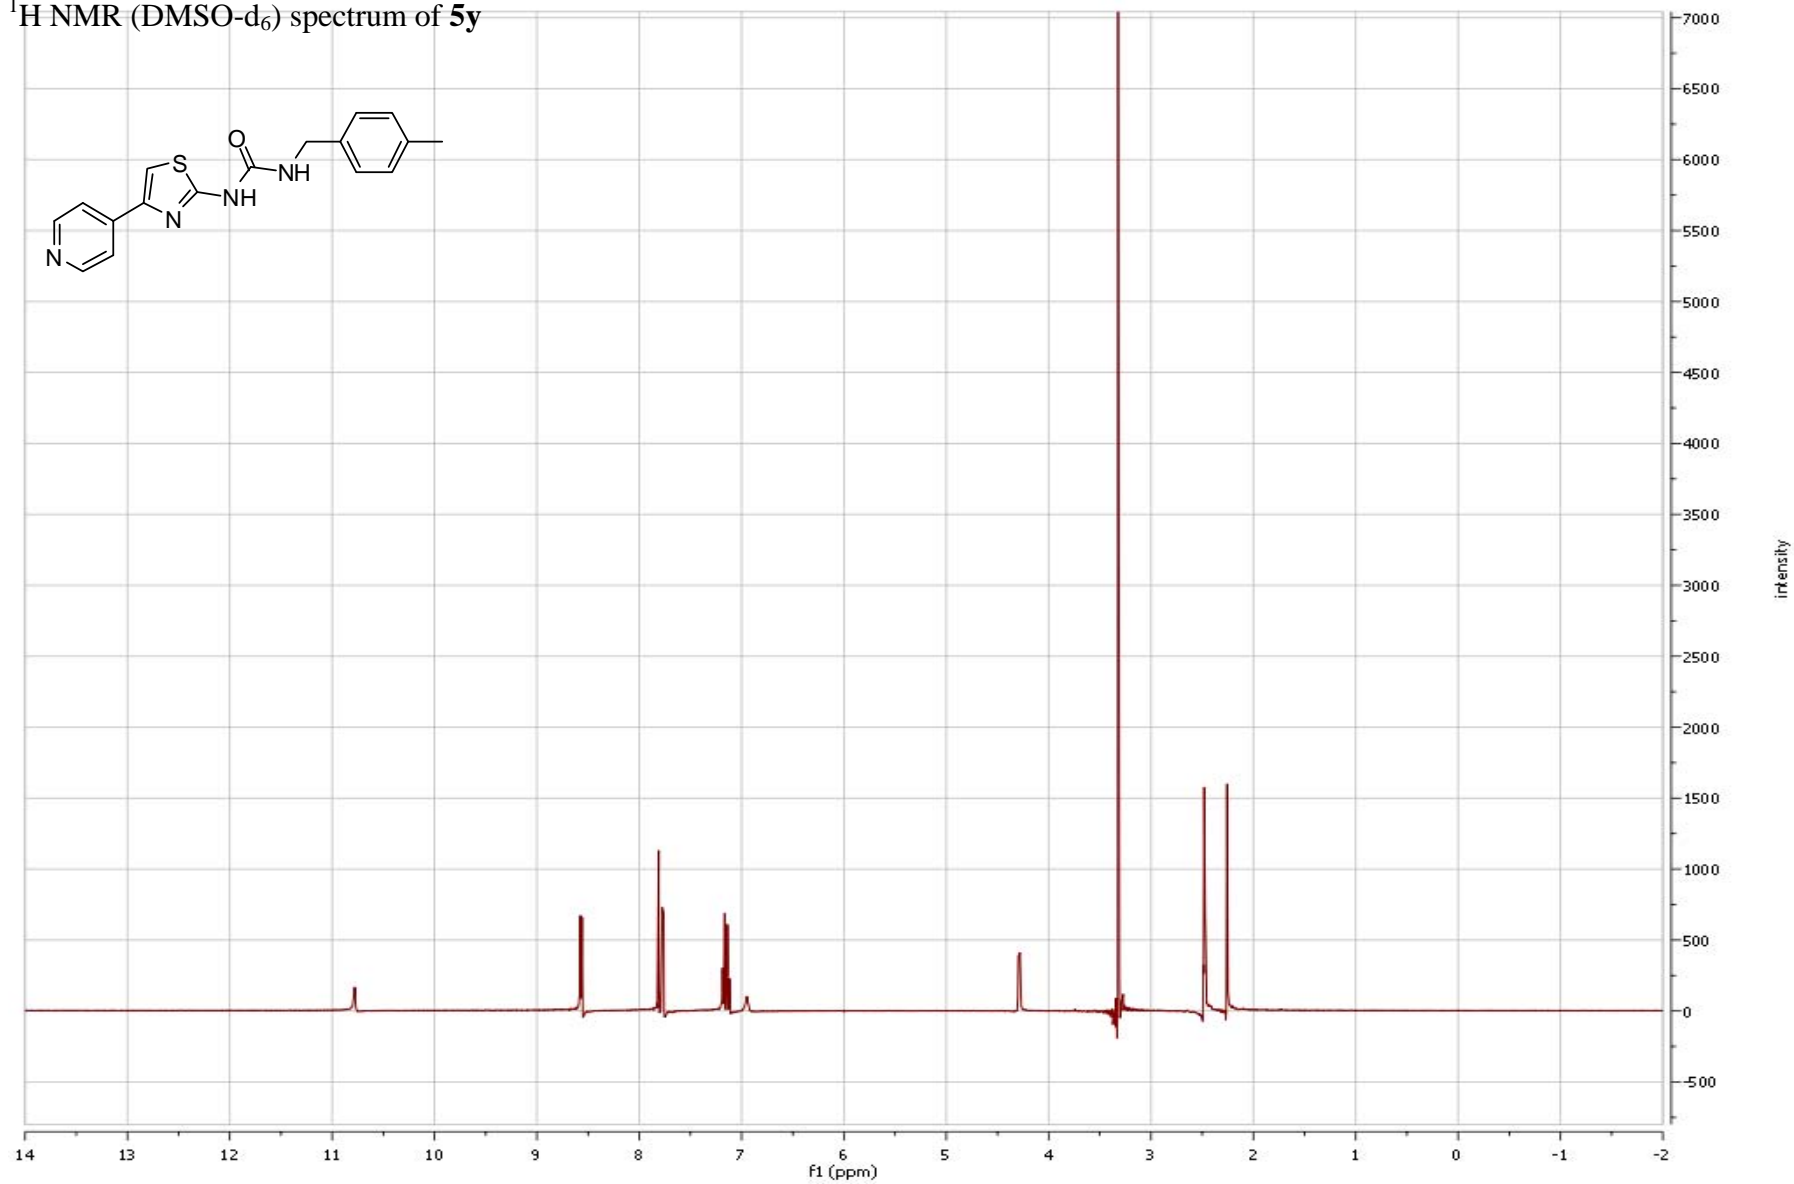

Expansion of the aromatic region of **5y**

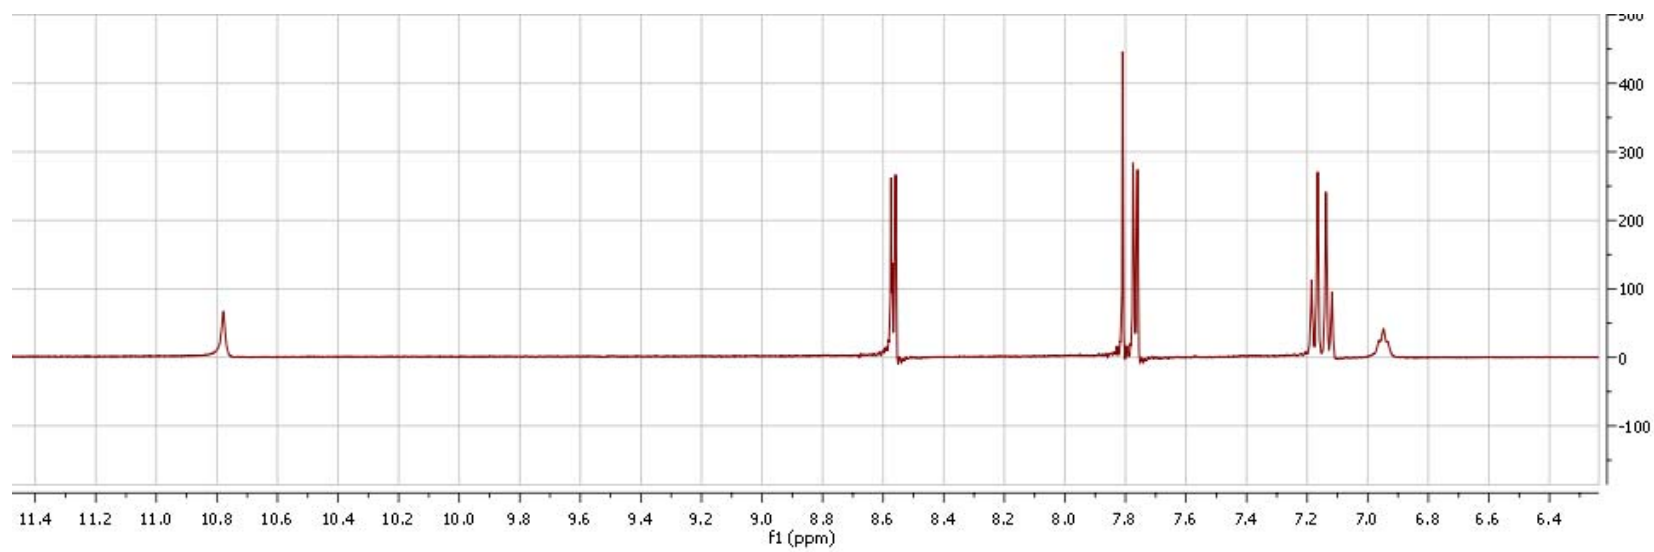

$^1\text{H}$  NMR (DMSO- $d_6$ ) spectrum of **5z**

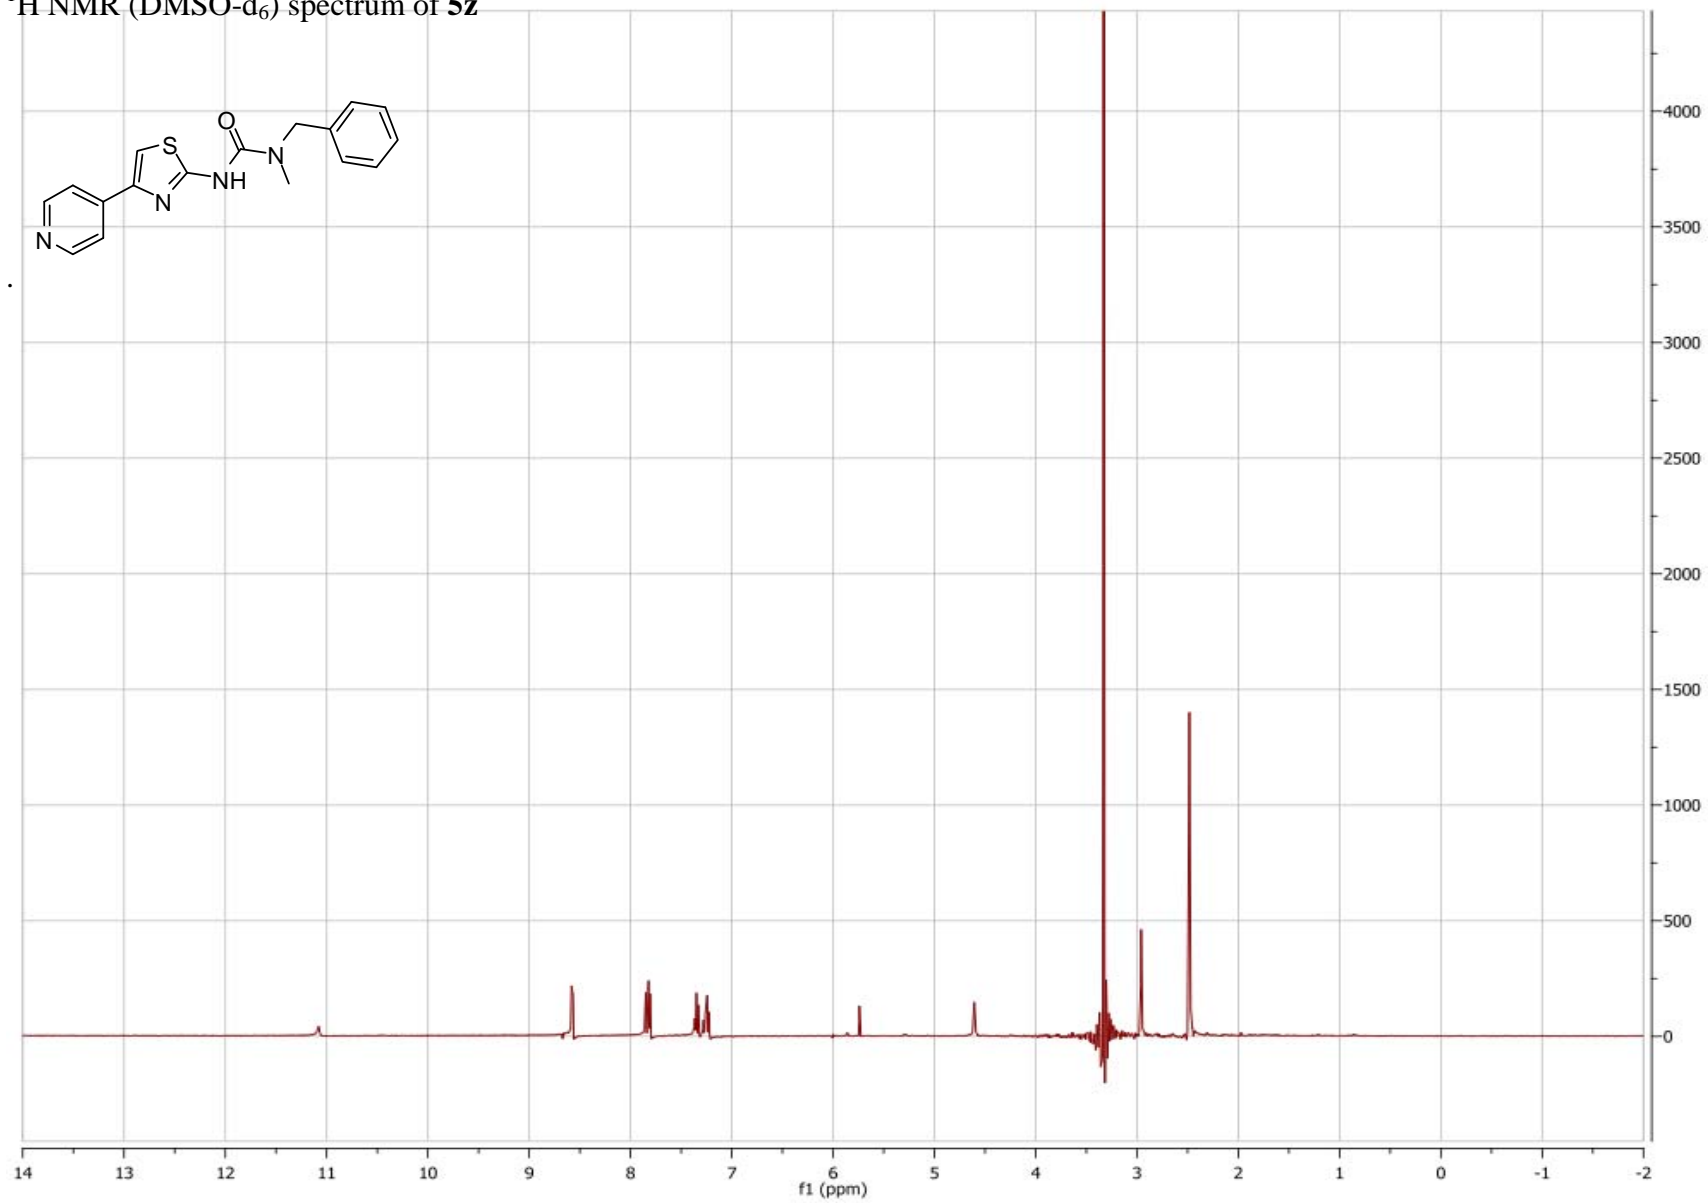

Expansion of the aromatic region of **5z**

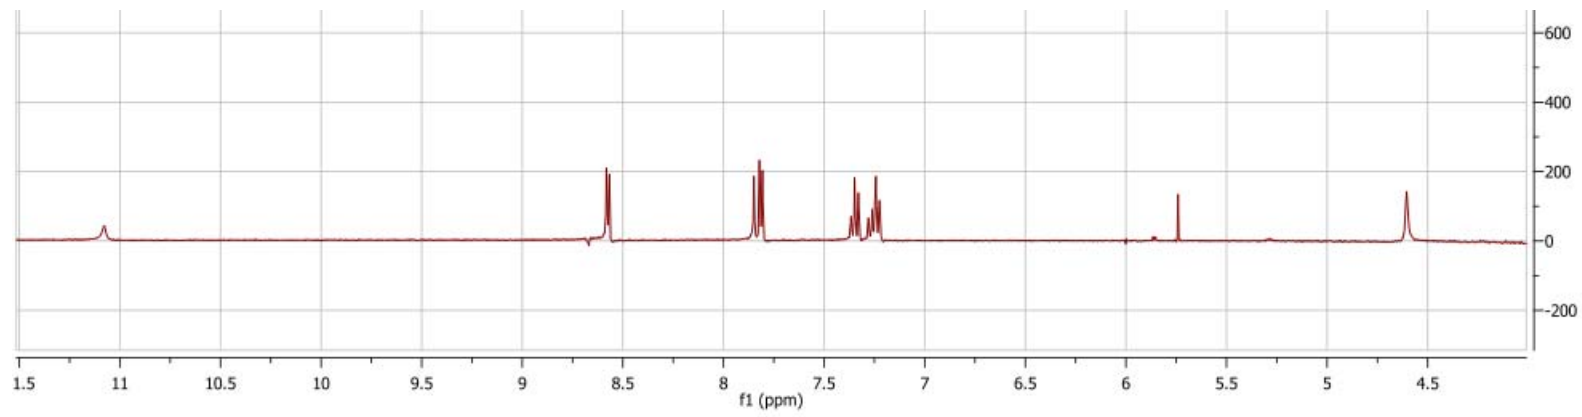

$^1\text{H}$  NMR (DMSO- $d_6$ ) spectrum of **5aa**

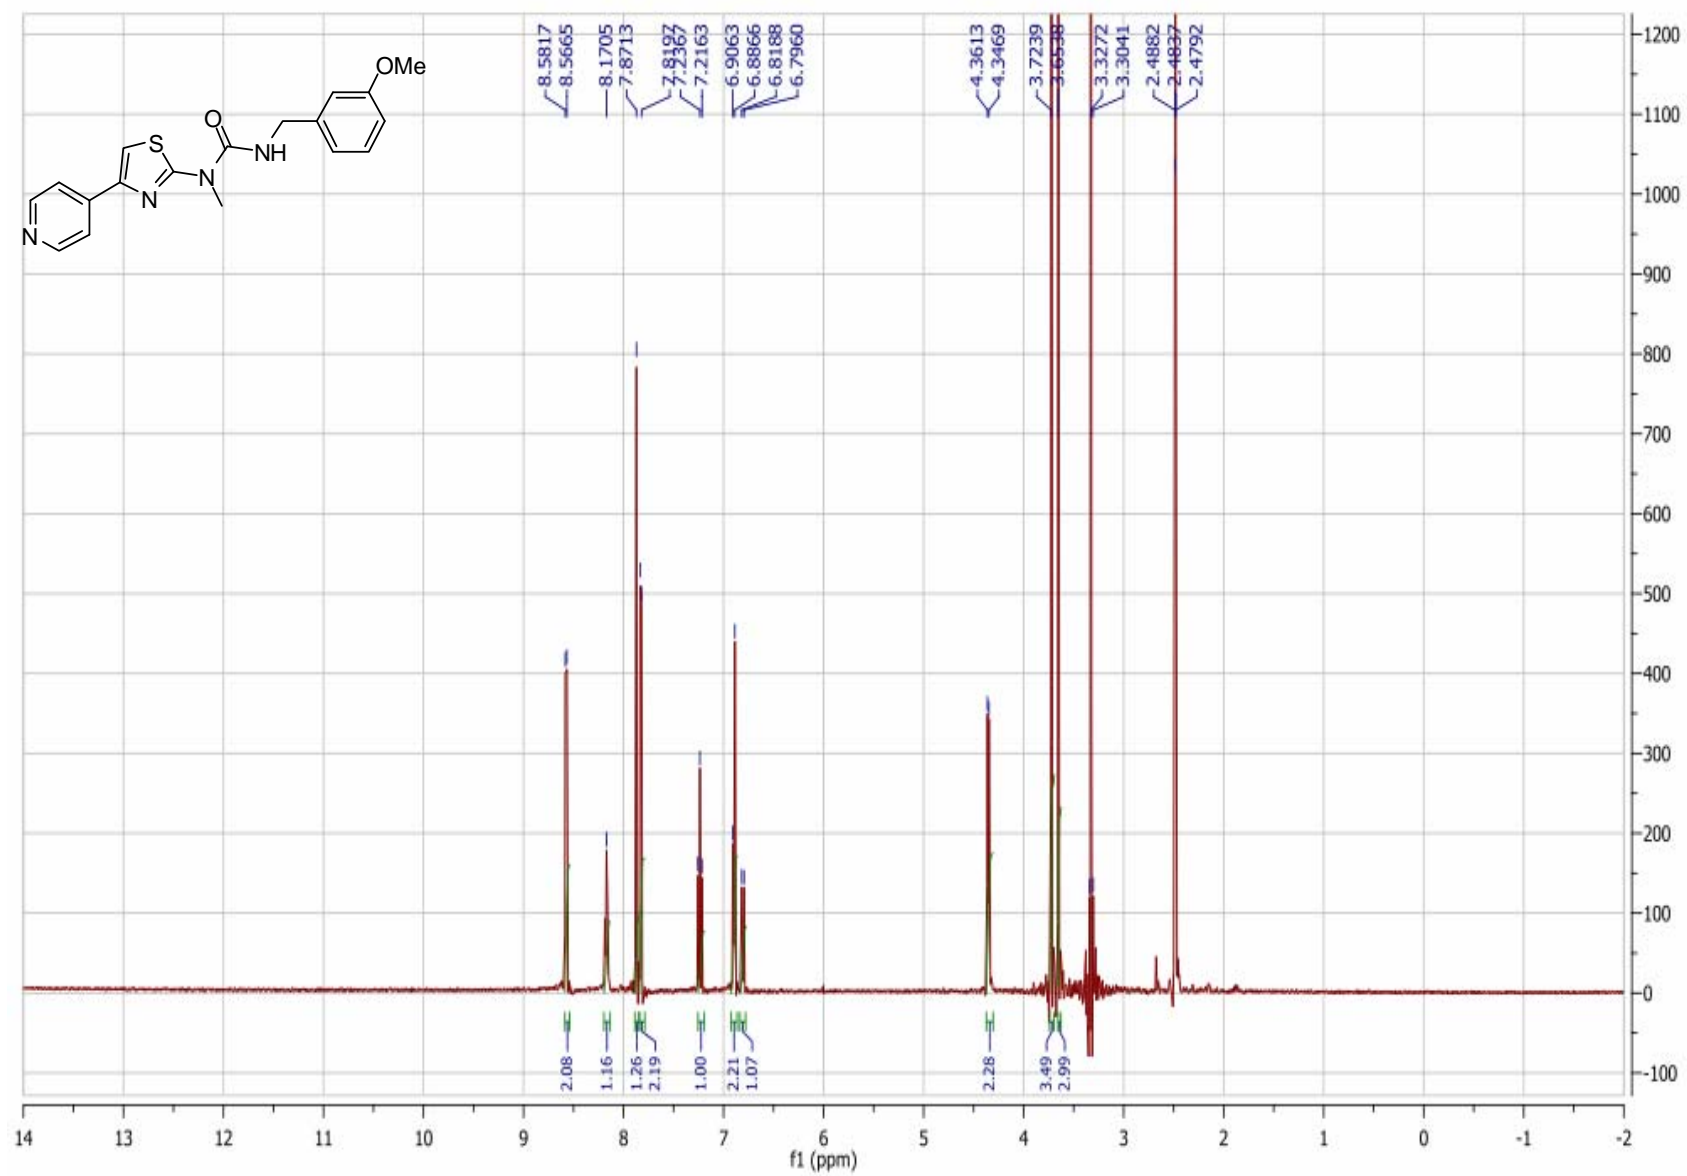

Expansion of the aromatic region of **5aa**

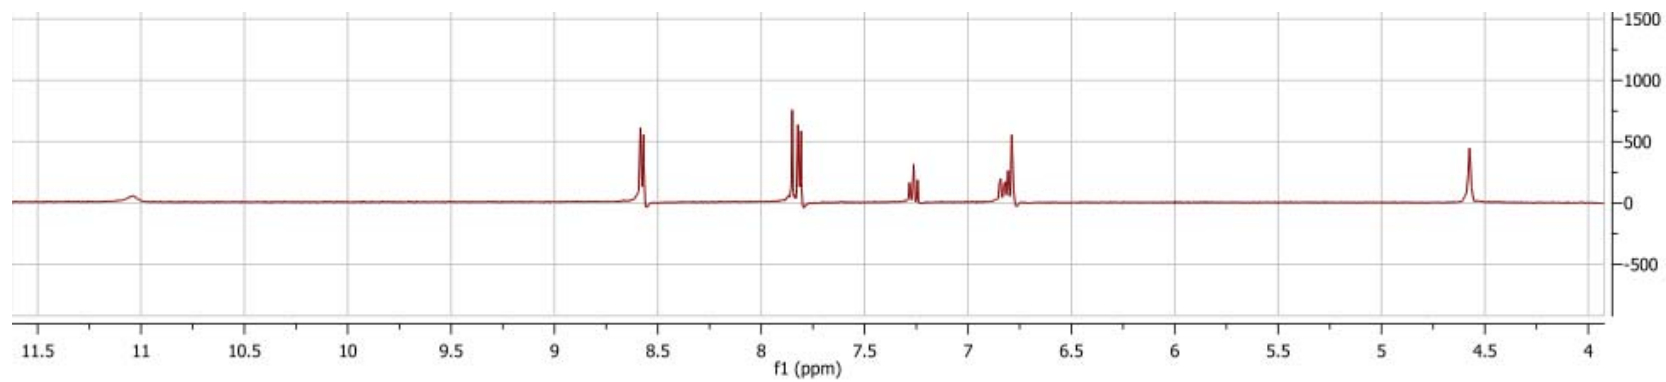

$^1\text{H}$  NMR (DMSO- $d_6$ ) spectrum of **5ab**

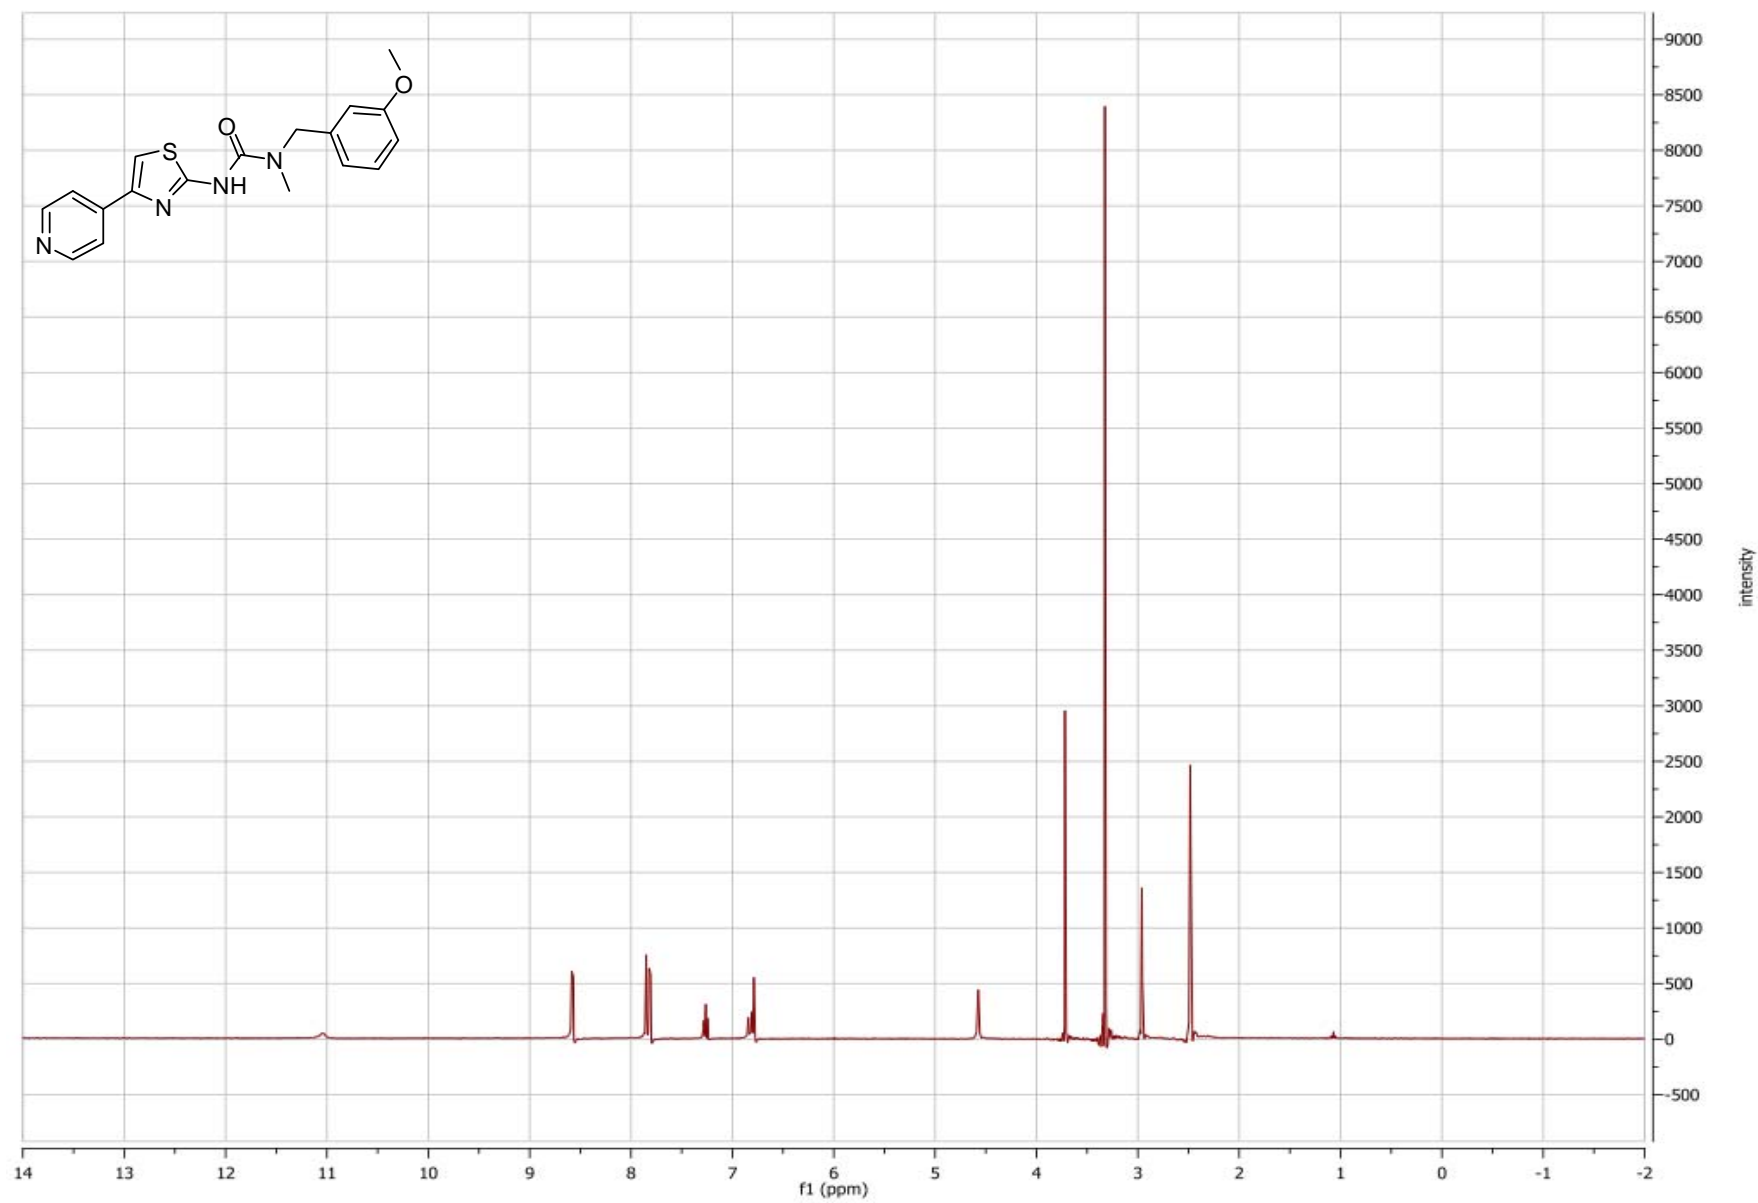



Expansion of the aromatic region of **5ab**

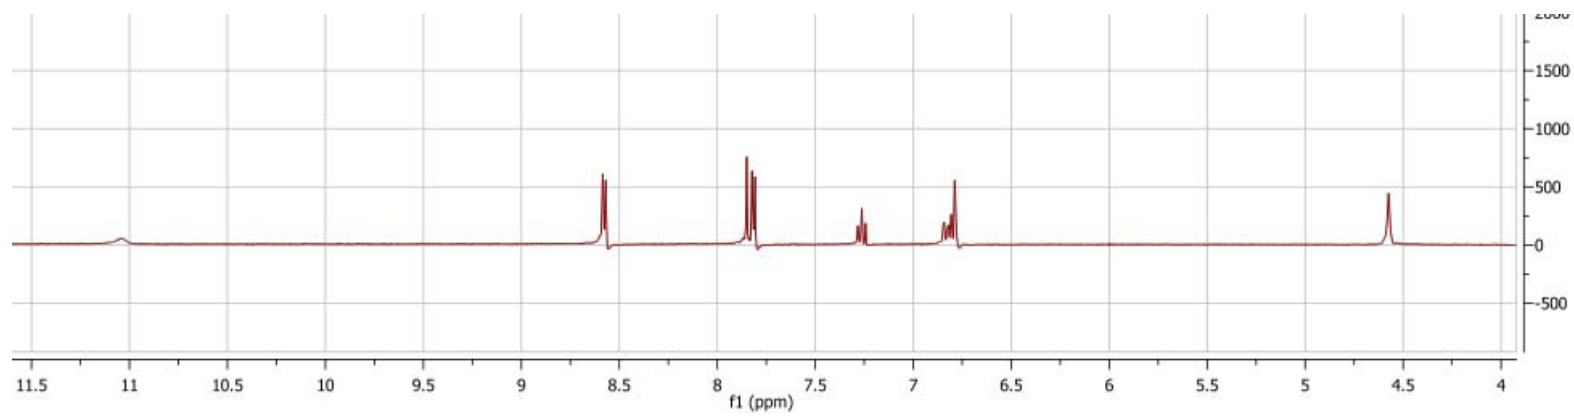

$^1\text{H}$  NMR (DMSO- $d_6$ ) spectrum of **12**

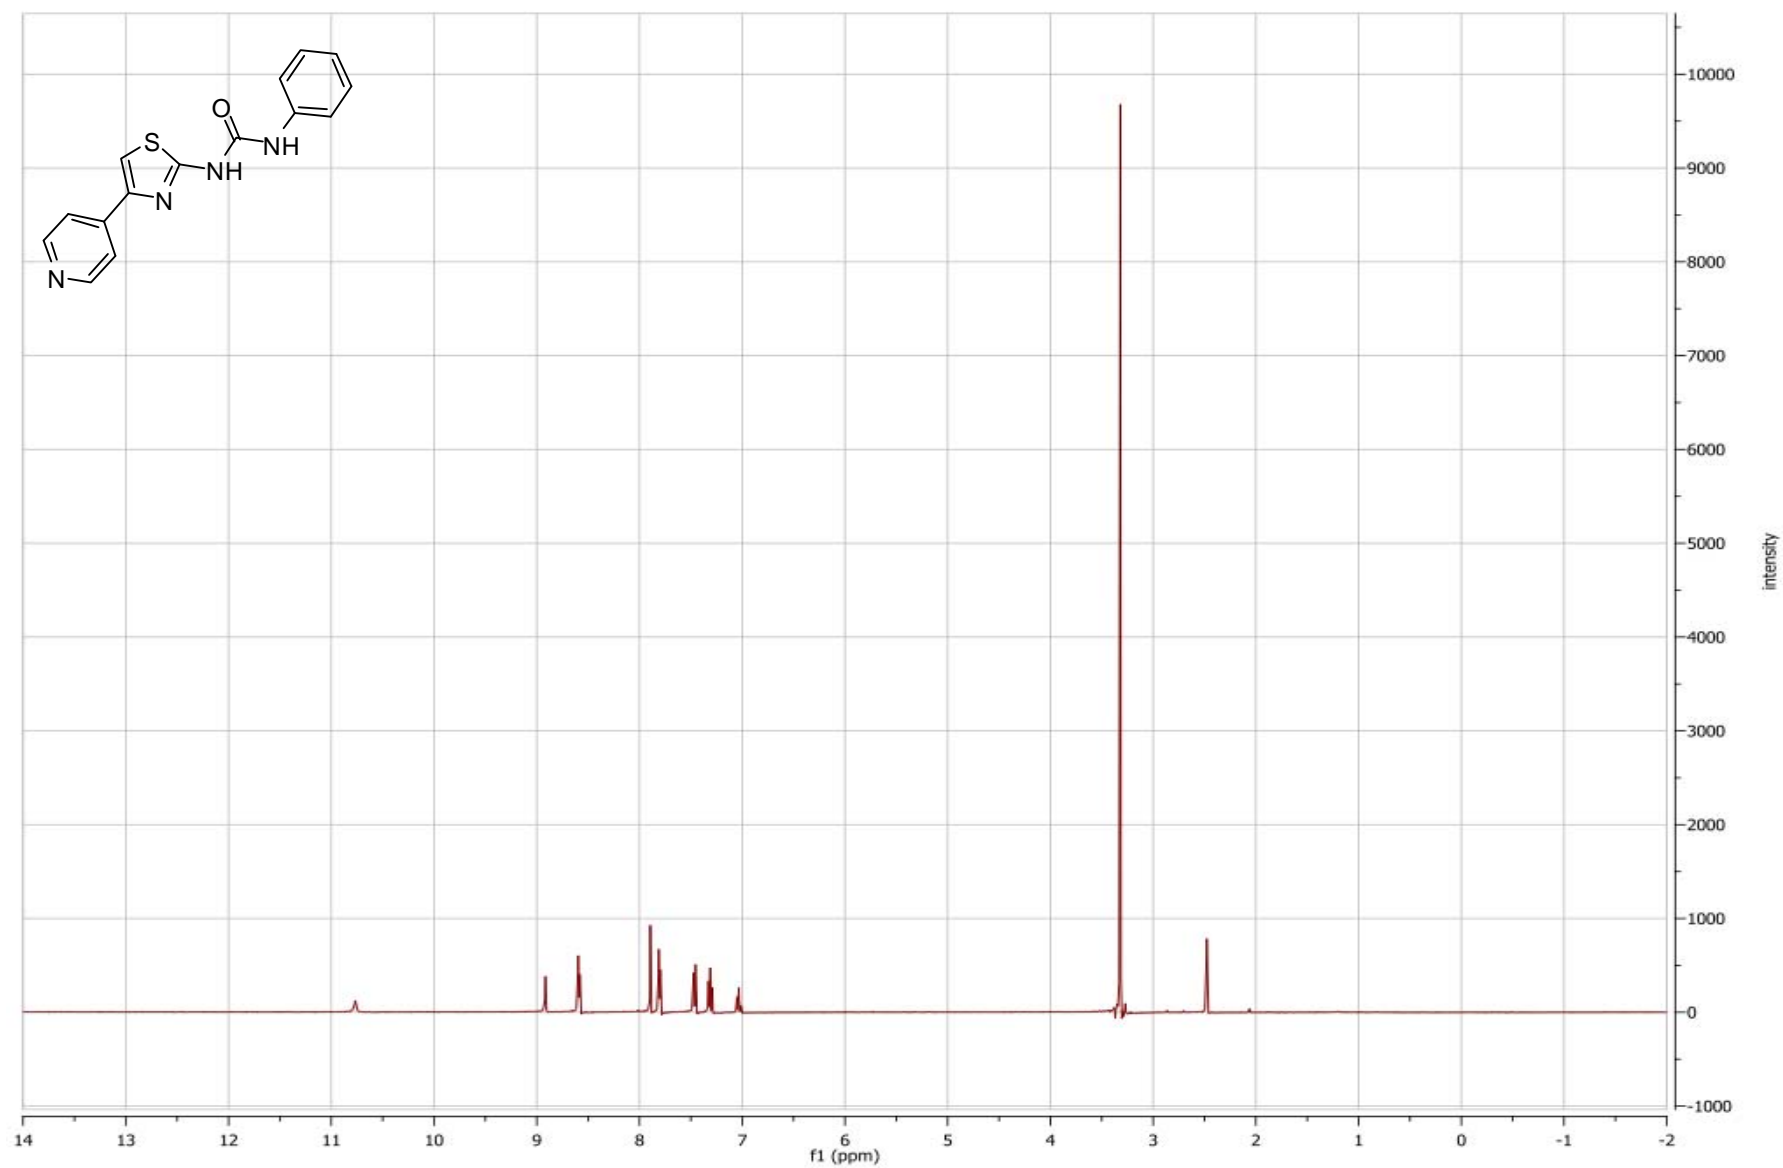

Expansion of the aromatic region of **12**

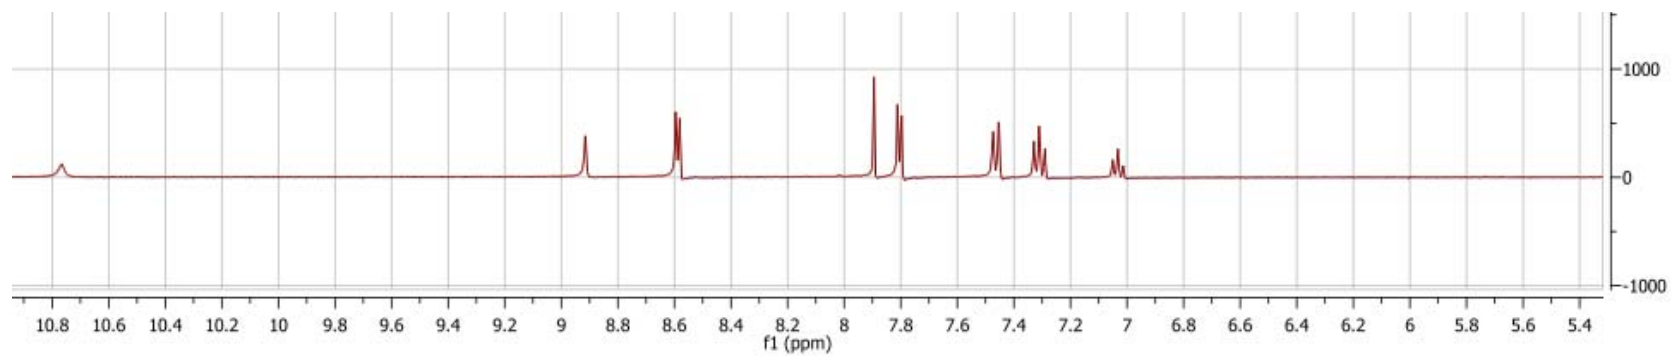

$^1\text{H}$  NMR (DMSO- $d_6$ ) spectrum of **13**

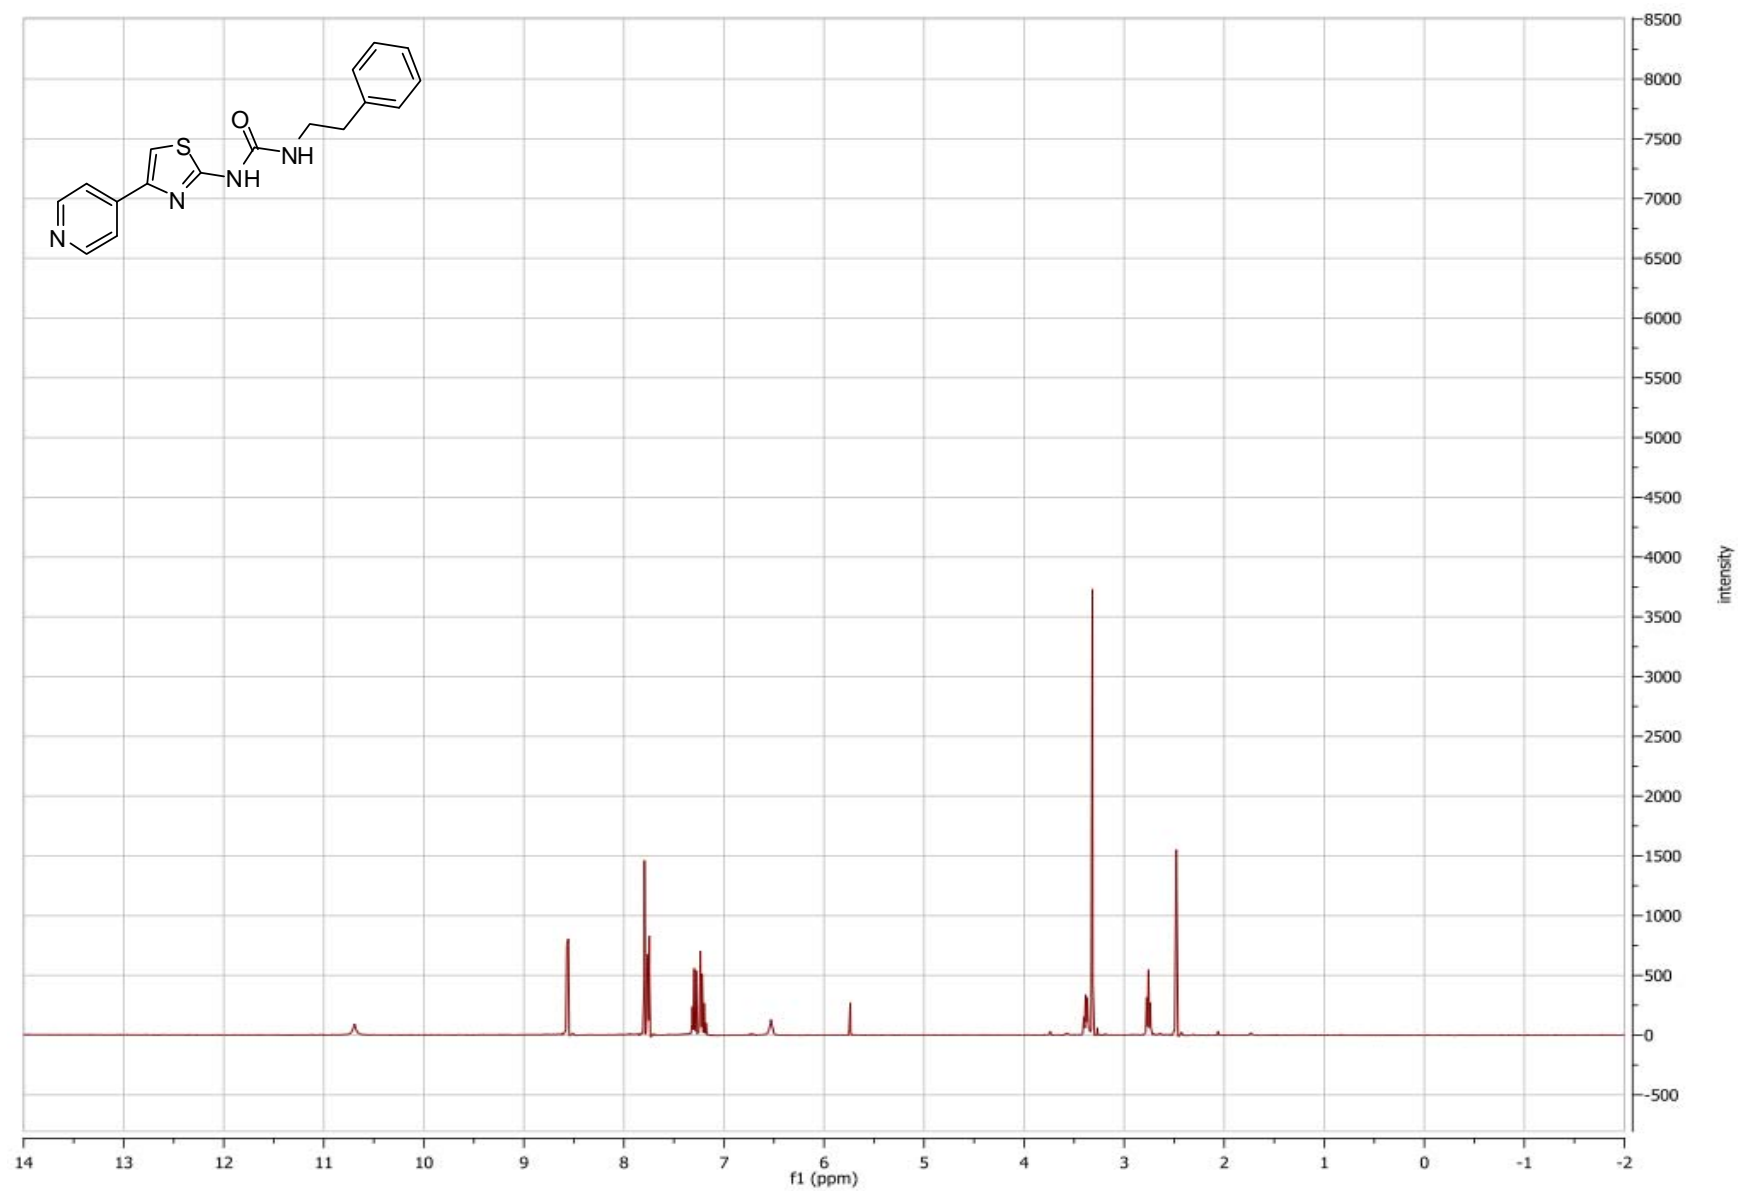

Expansion of the aromatic region of **13**

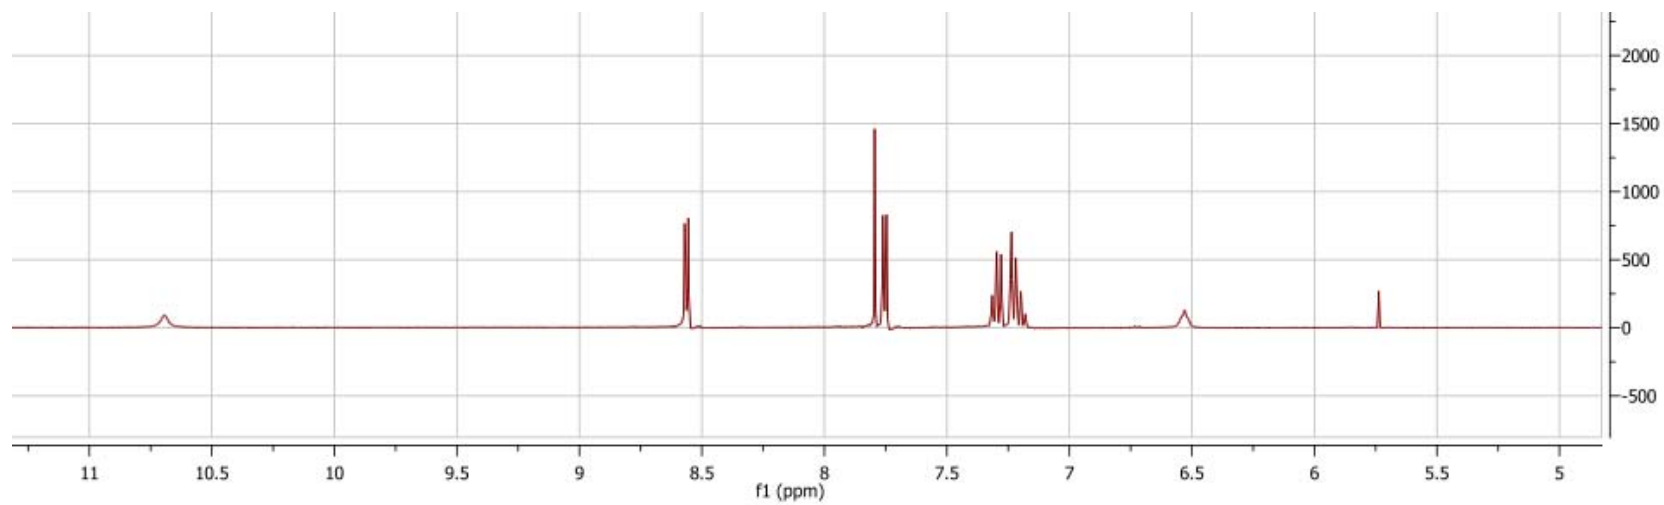

$^1\text{H}$  NMR (DMSO- $d_6$ ) spectrum of (*R*)-14a

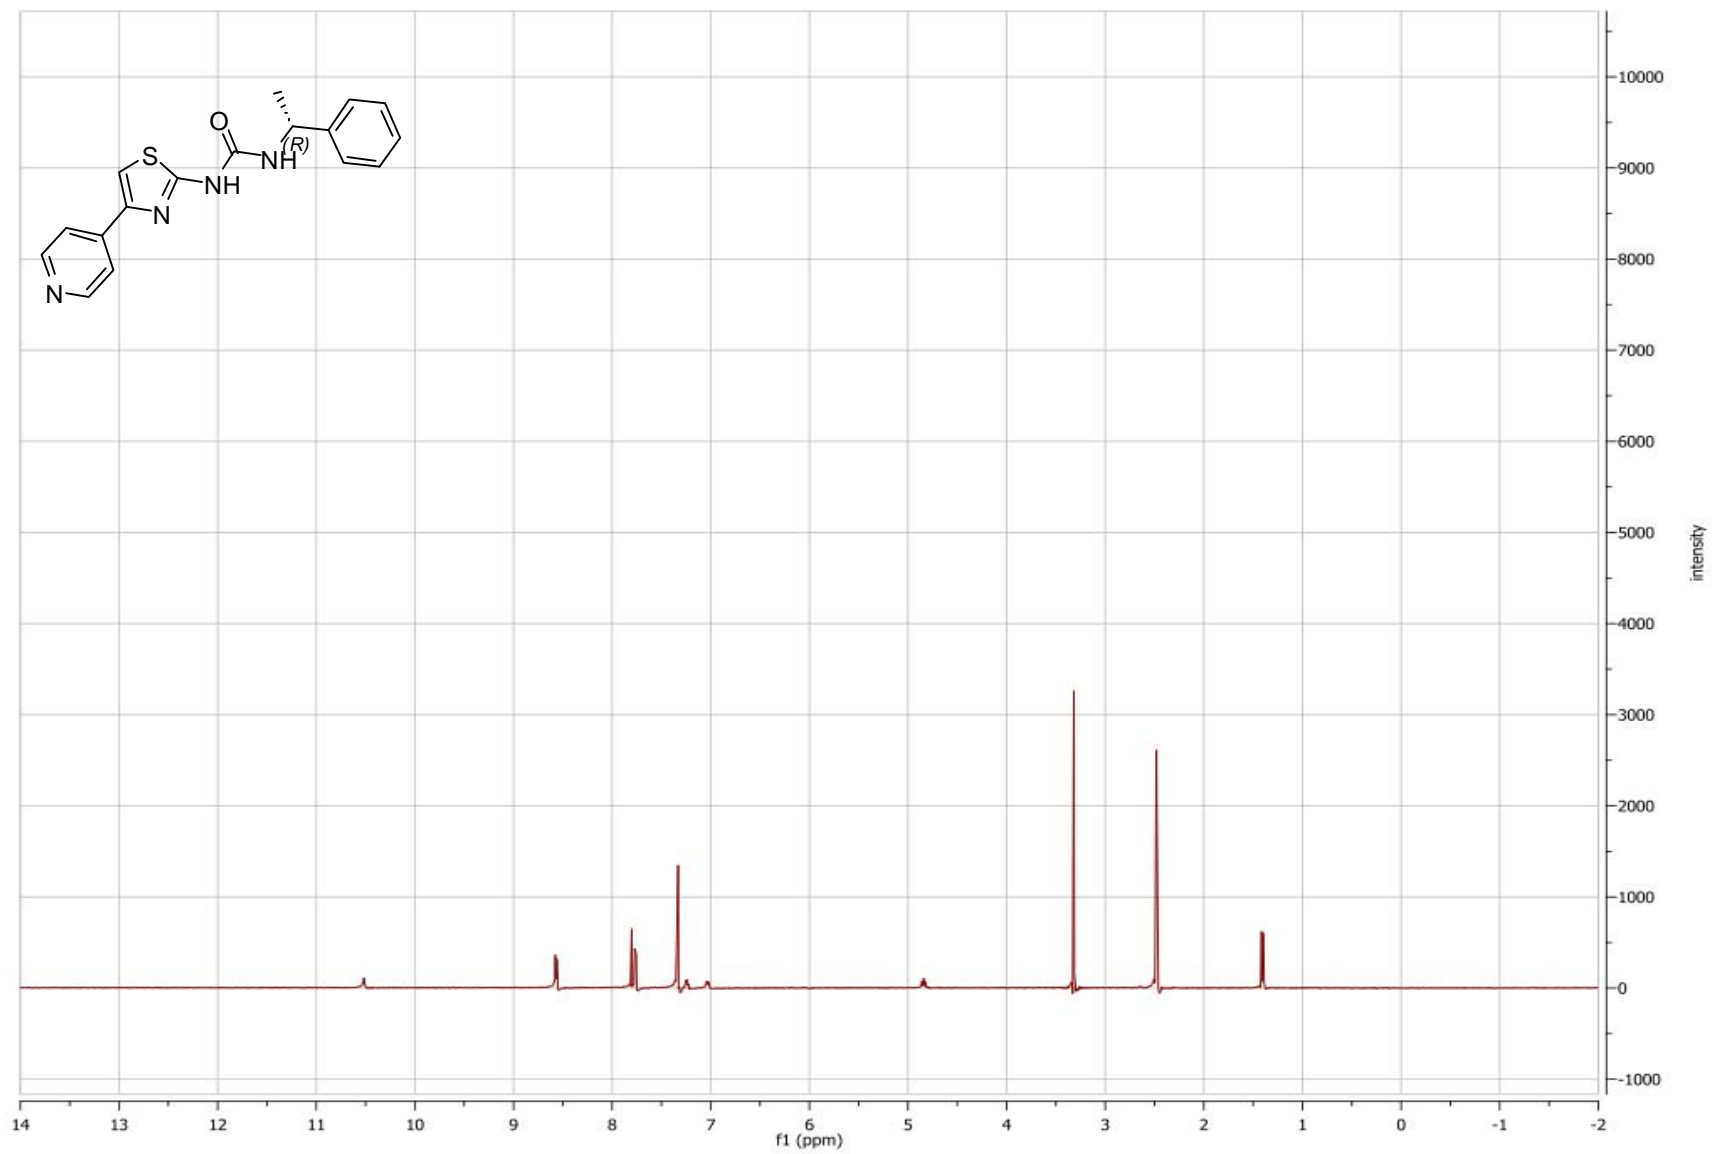

Expansion of the aromatic region of (*R*)-14a

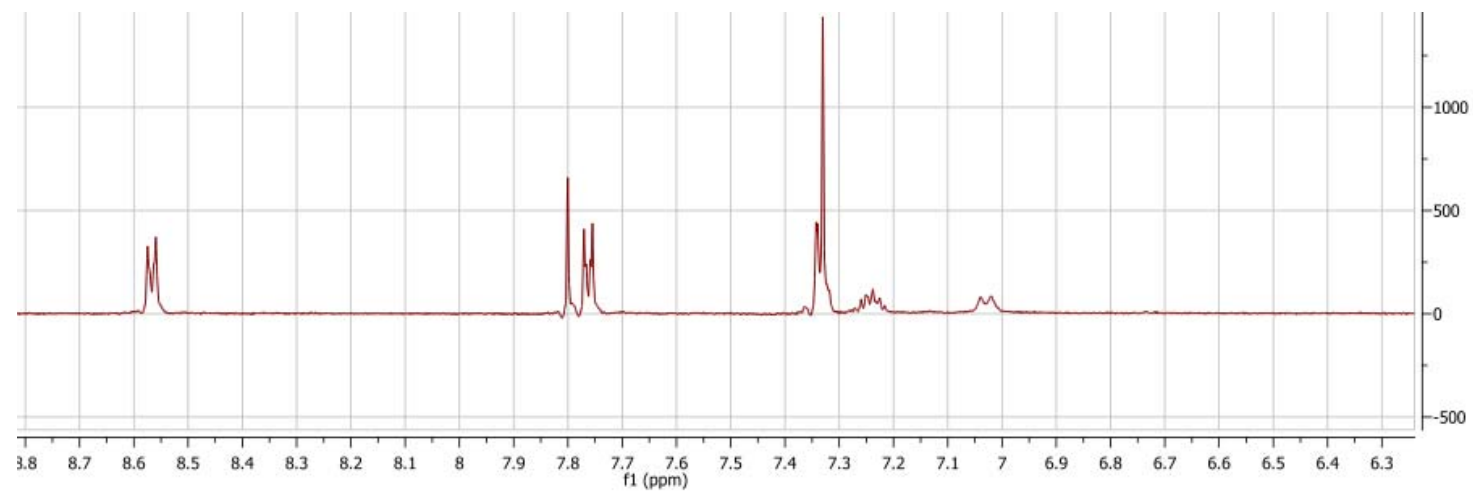

$^1\text{H}$  NMR (DMSO- $d_6$ ) spectrum of (*S*)-**14a**

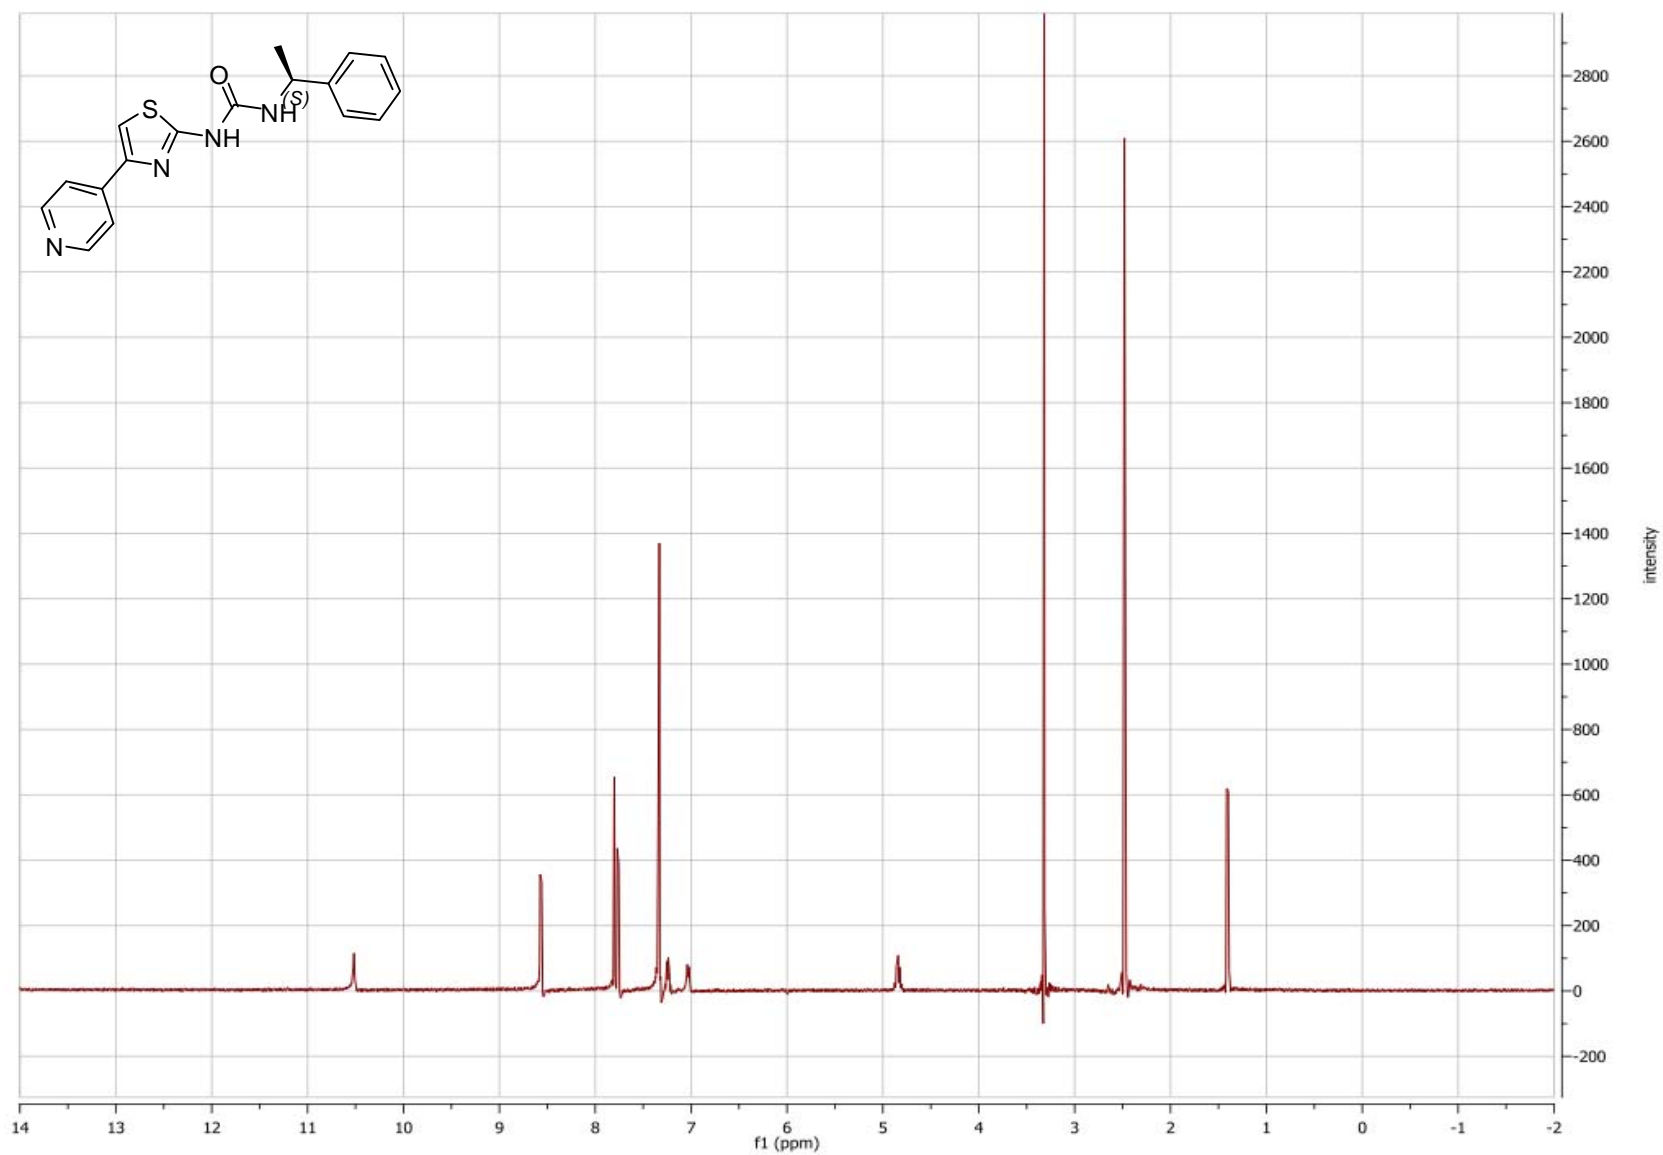



Expansion of the aromatic region of (*S*)-14a

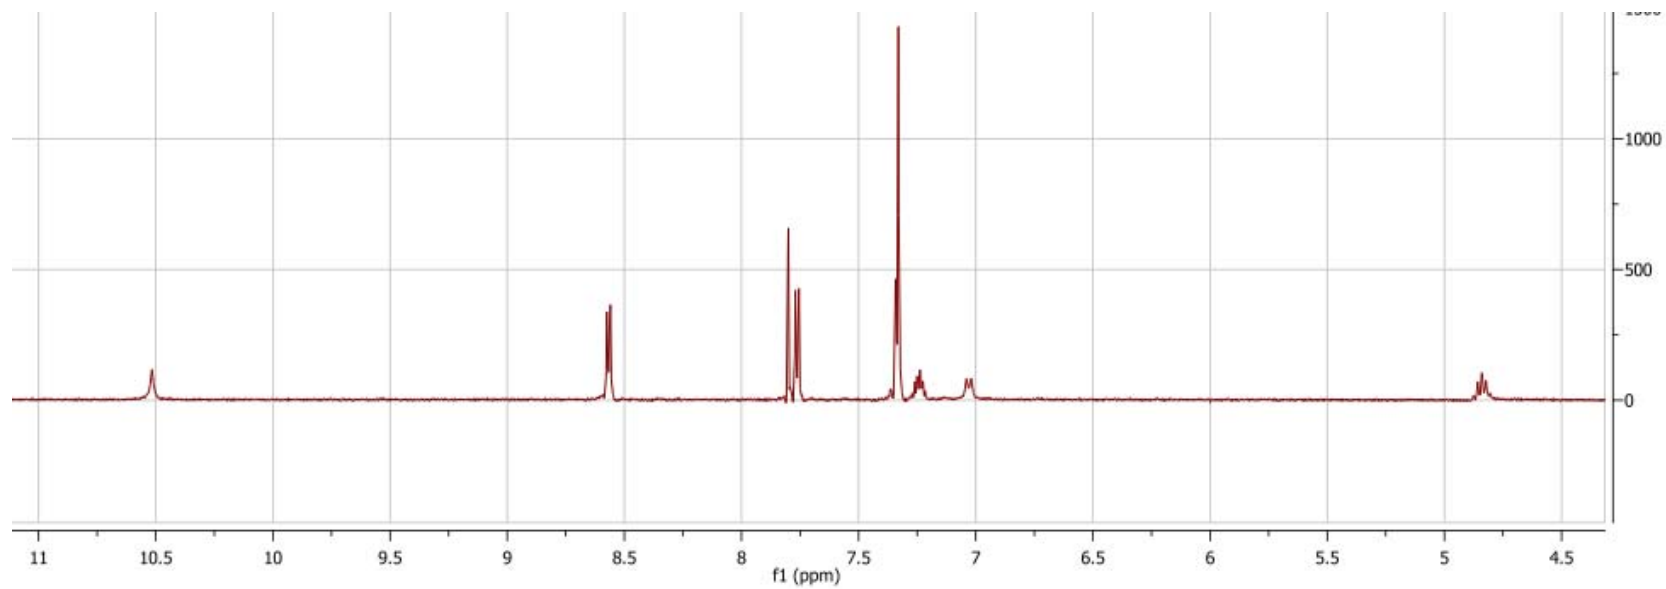

$^1\text{H}$  NMR (DMSO- $d_6$ ) spectrum of (*R,S*)-14b

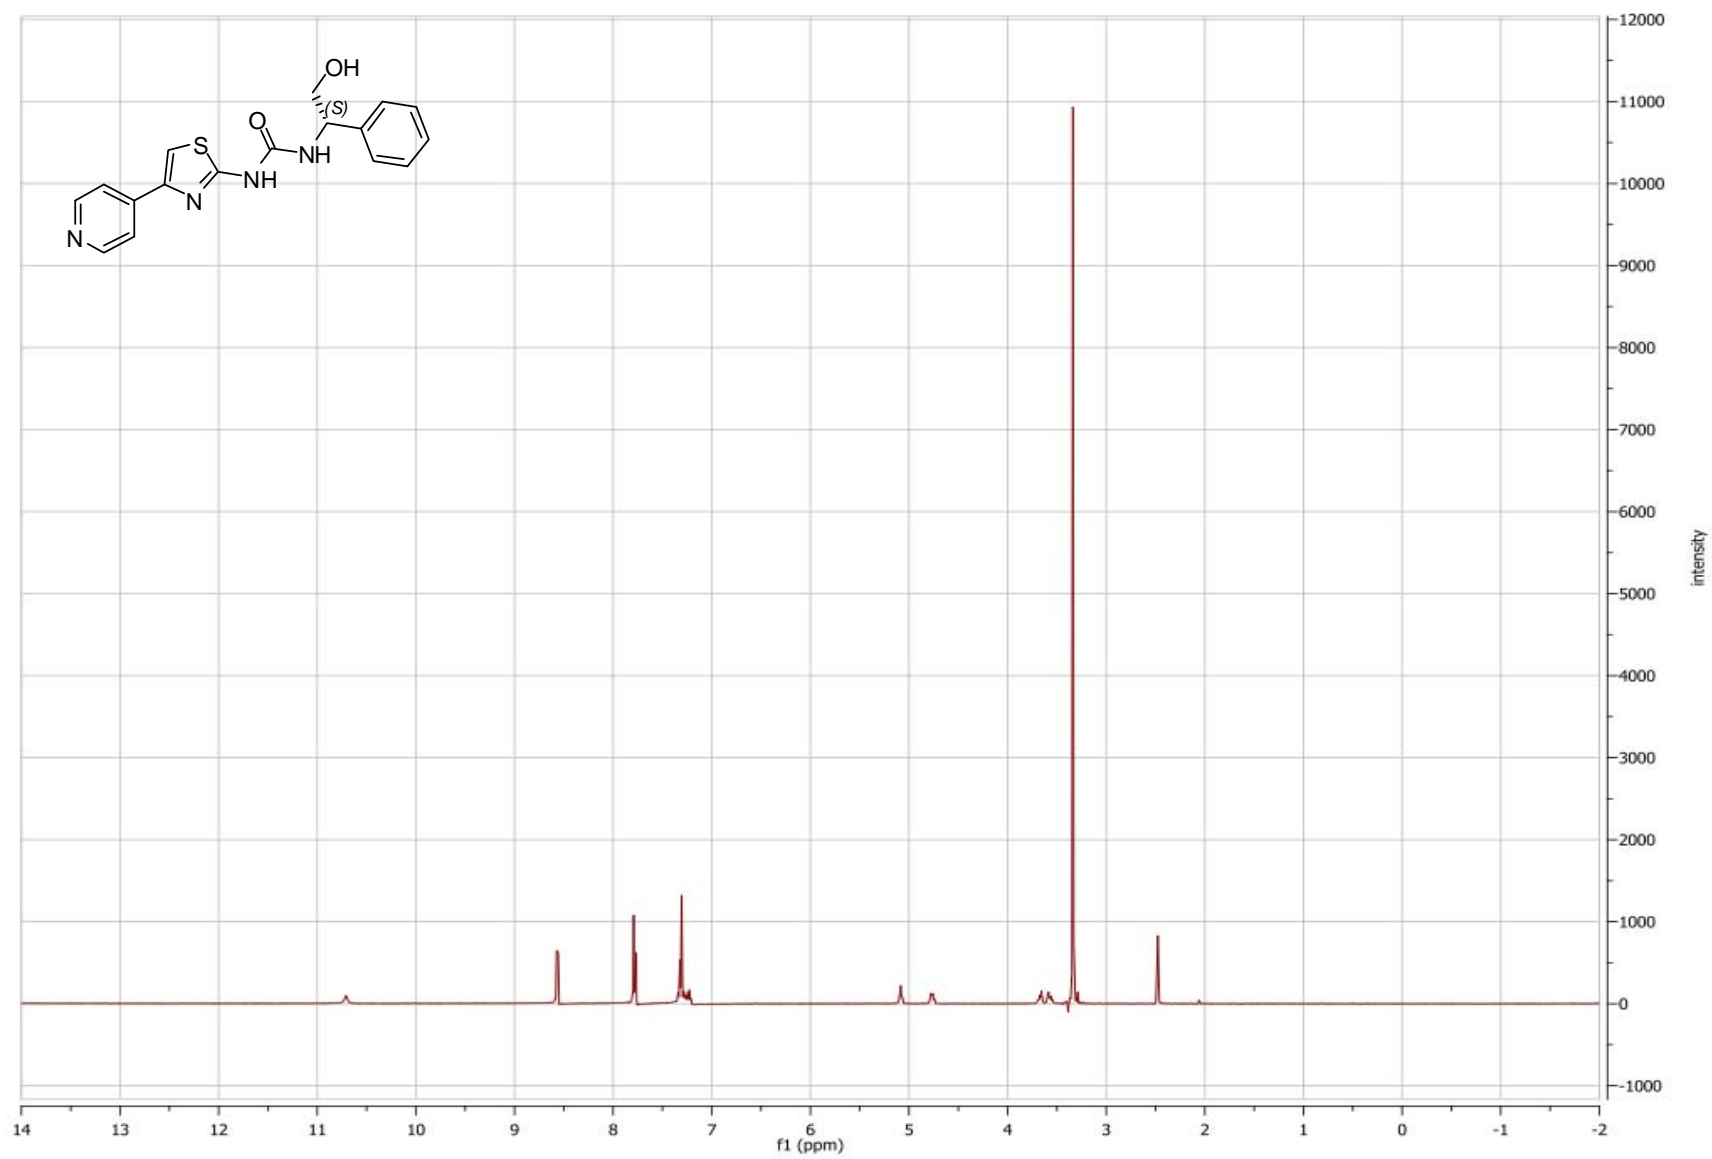

Expansion of the aromatic region of (*R,S*)-**14b**

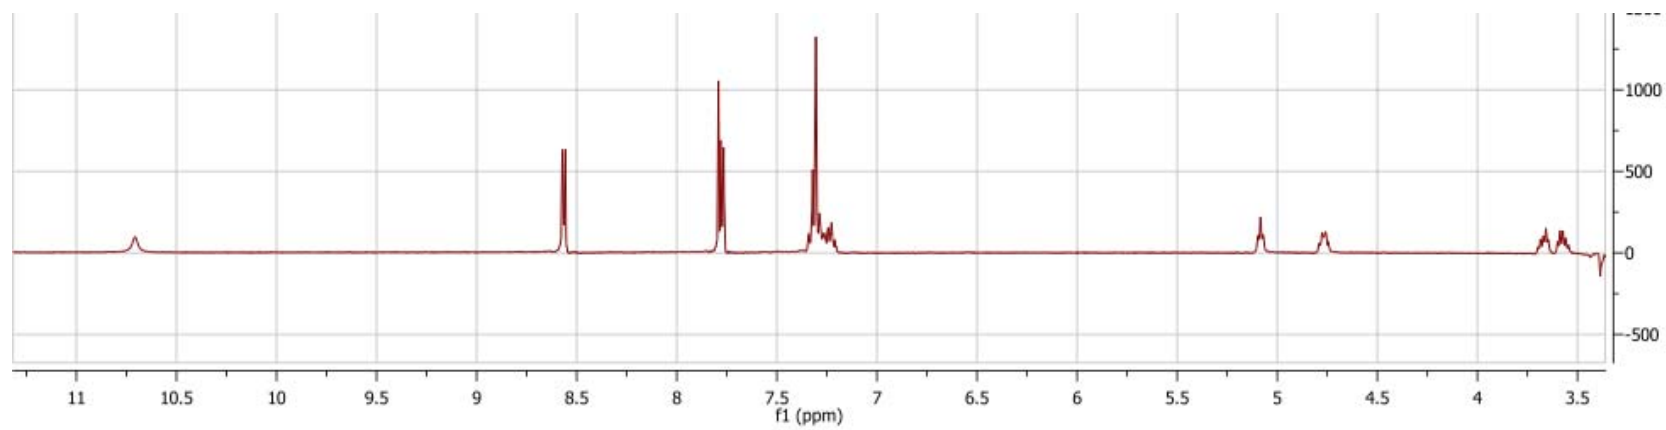

$^1\text{H}$  NMR (DMSO- $d_6$ ) spectrum of (*S*)-**14b**

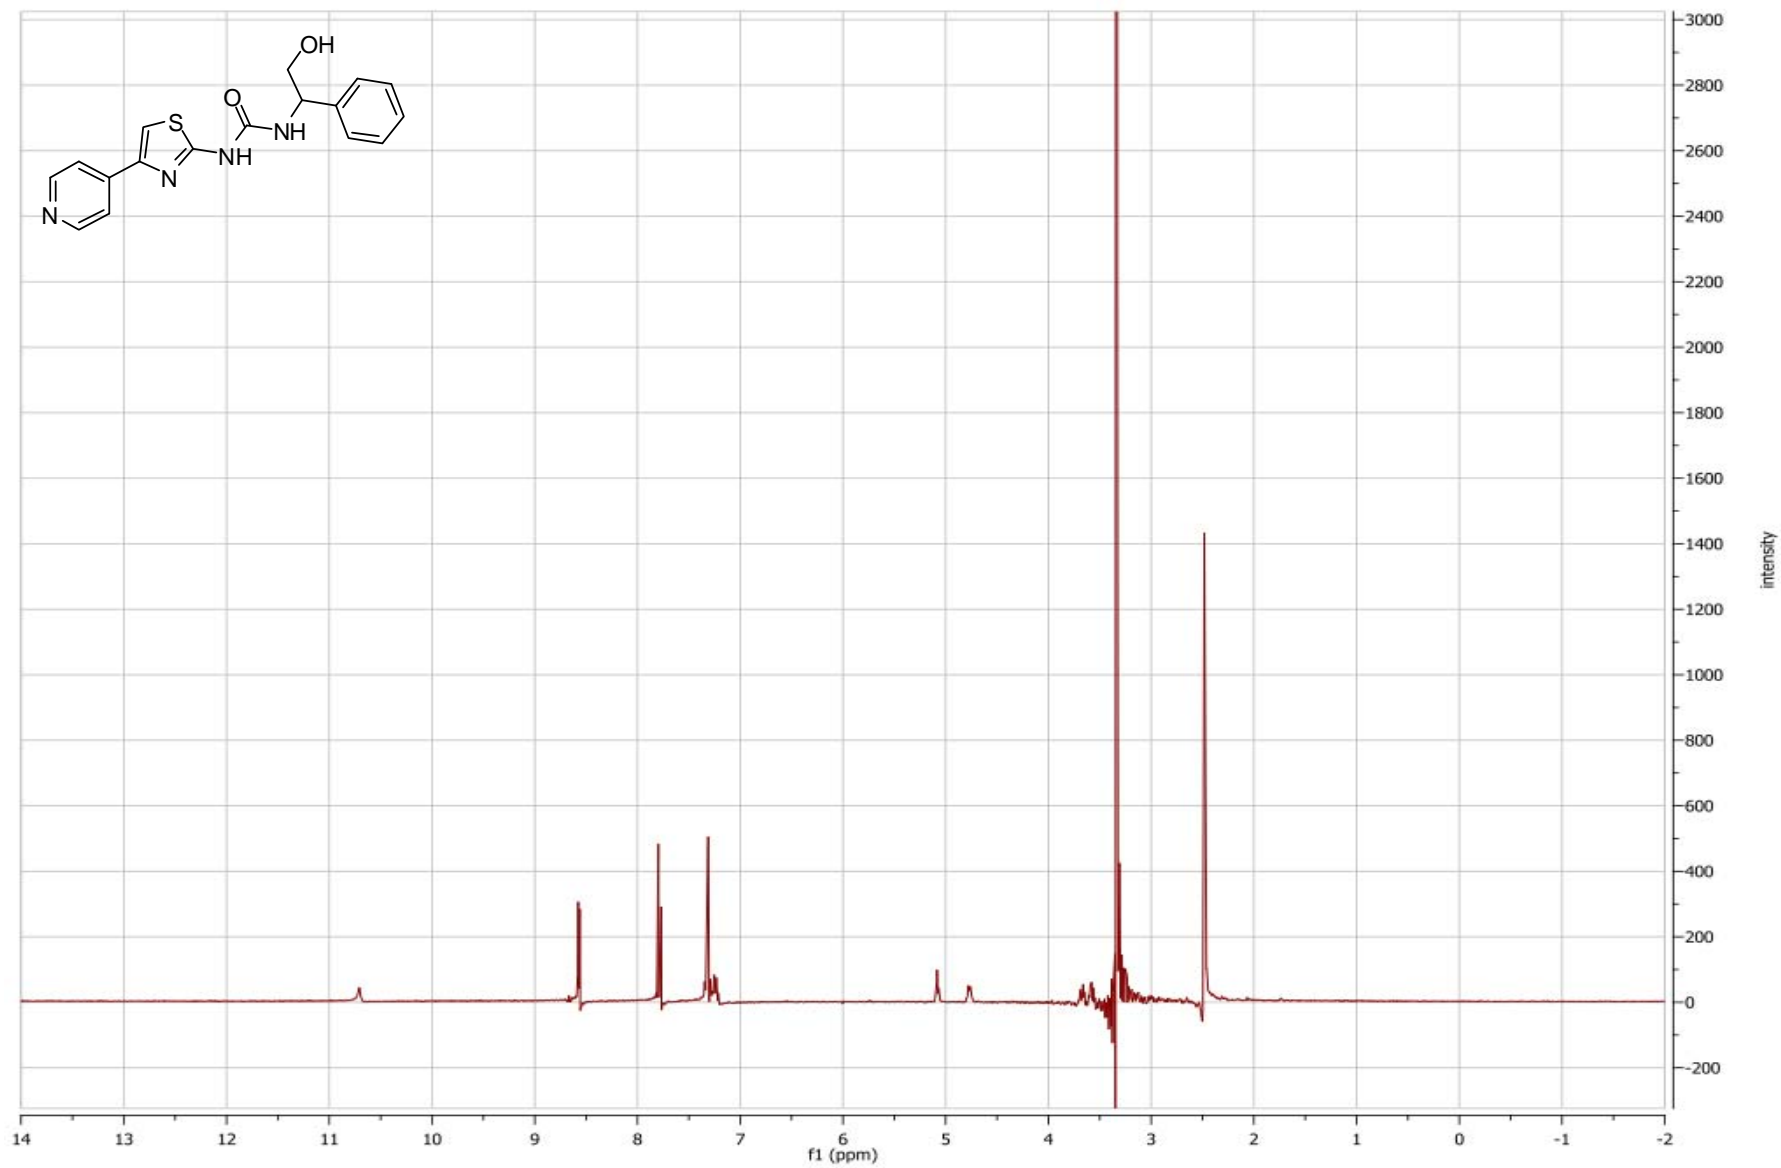

Expansion of the aromatic region of (*S*)-**14b**

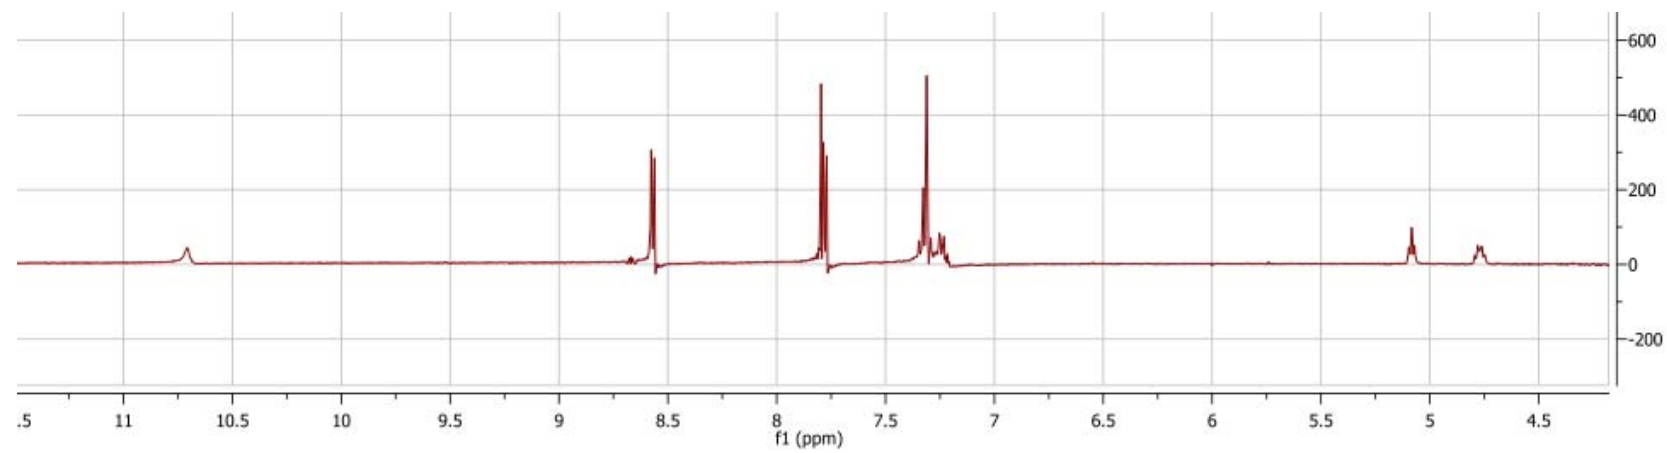

$^1\text{H}$  NMR (DMSO- $d_6$ ) spectrum of (*R*)-14b

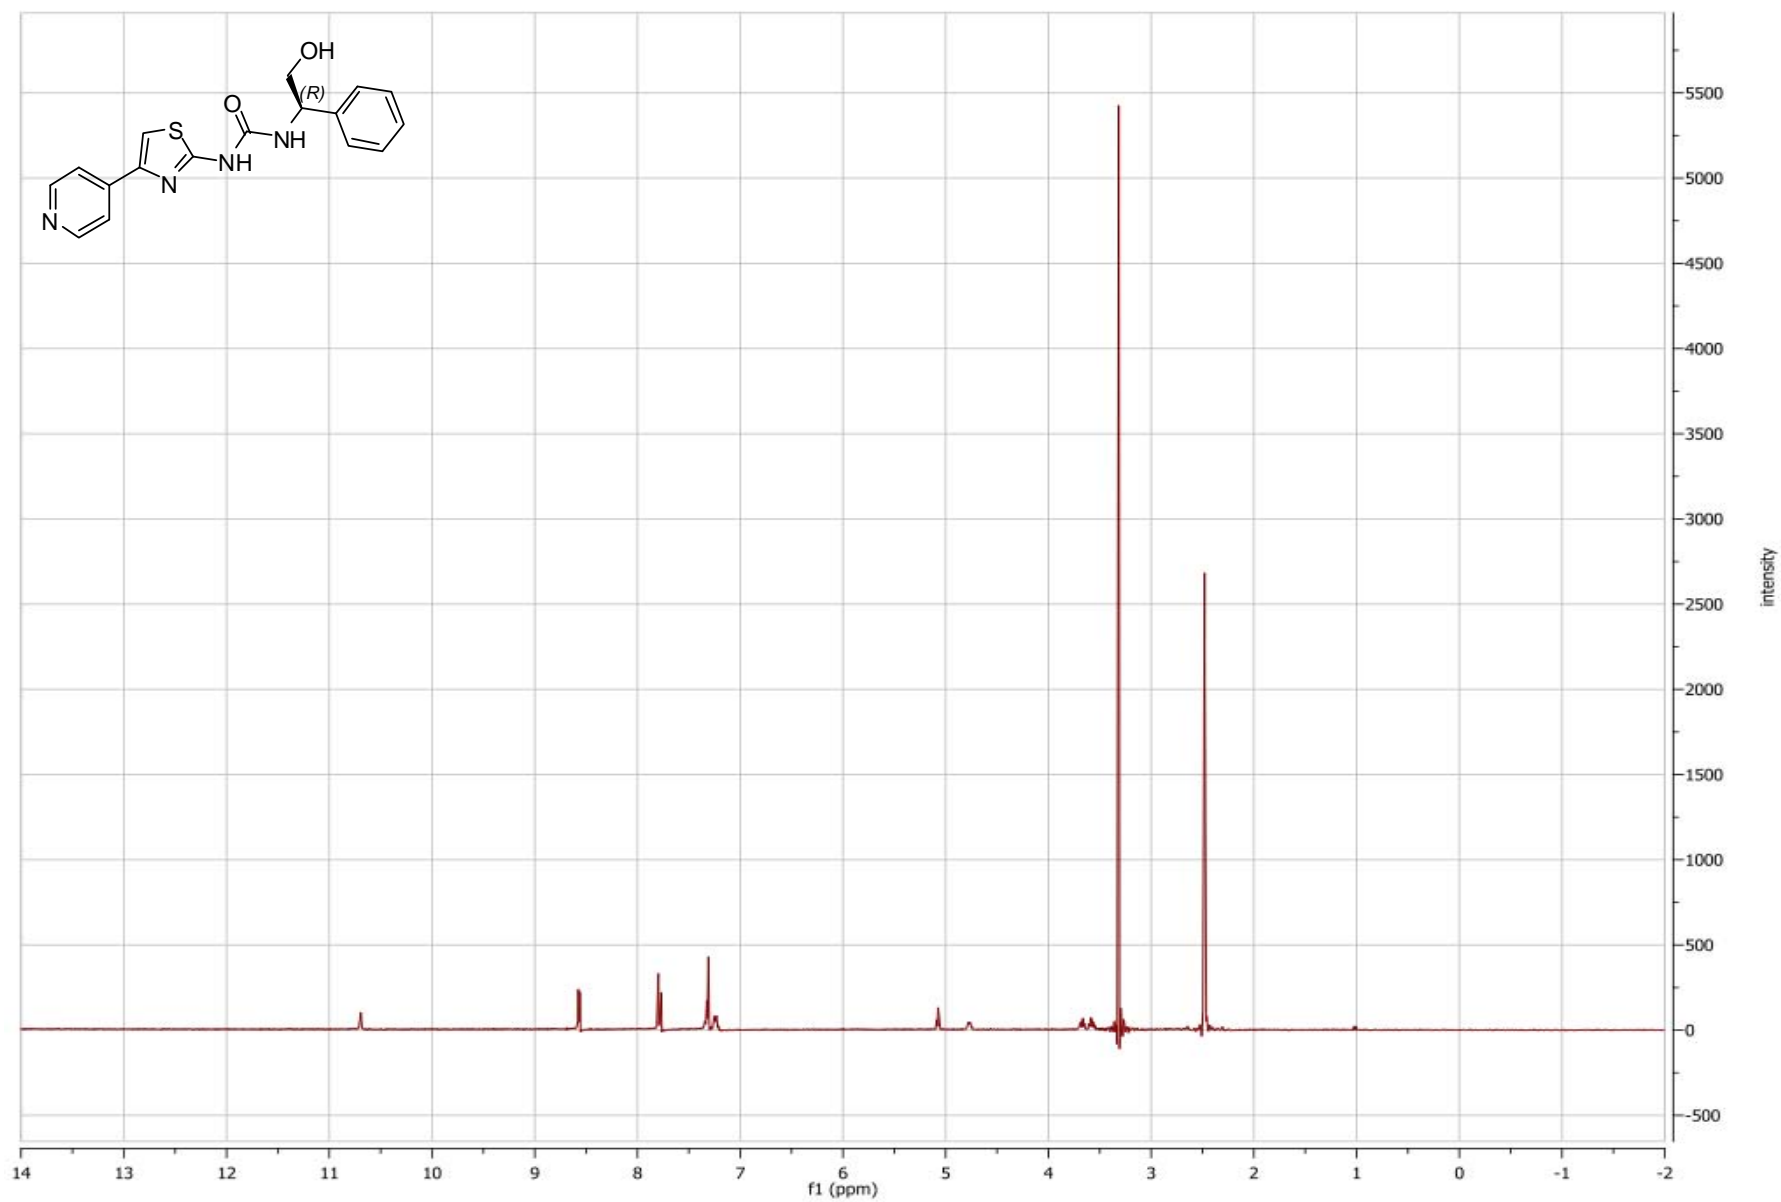

Expansion of the aromatic region of (*R*)-14b

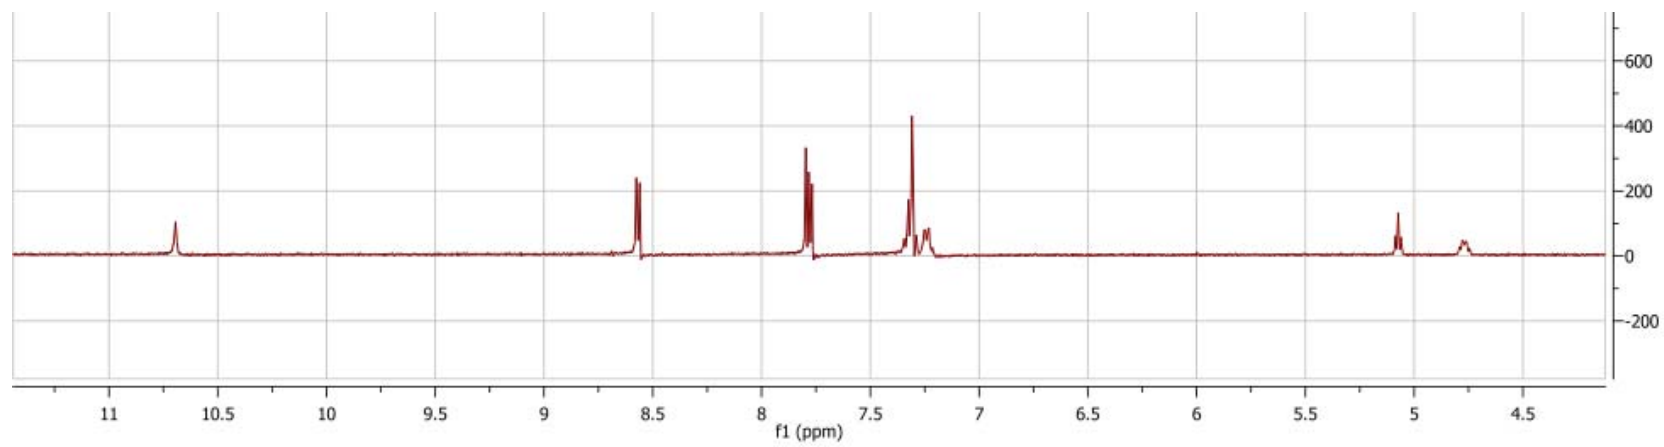

$^1\text{H}$  NMR (DMSO- $d_6$ ) spectrum of (*R*)-14c

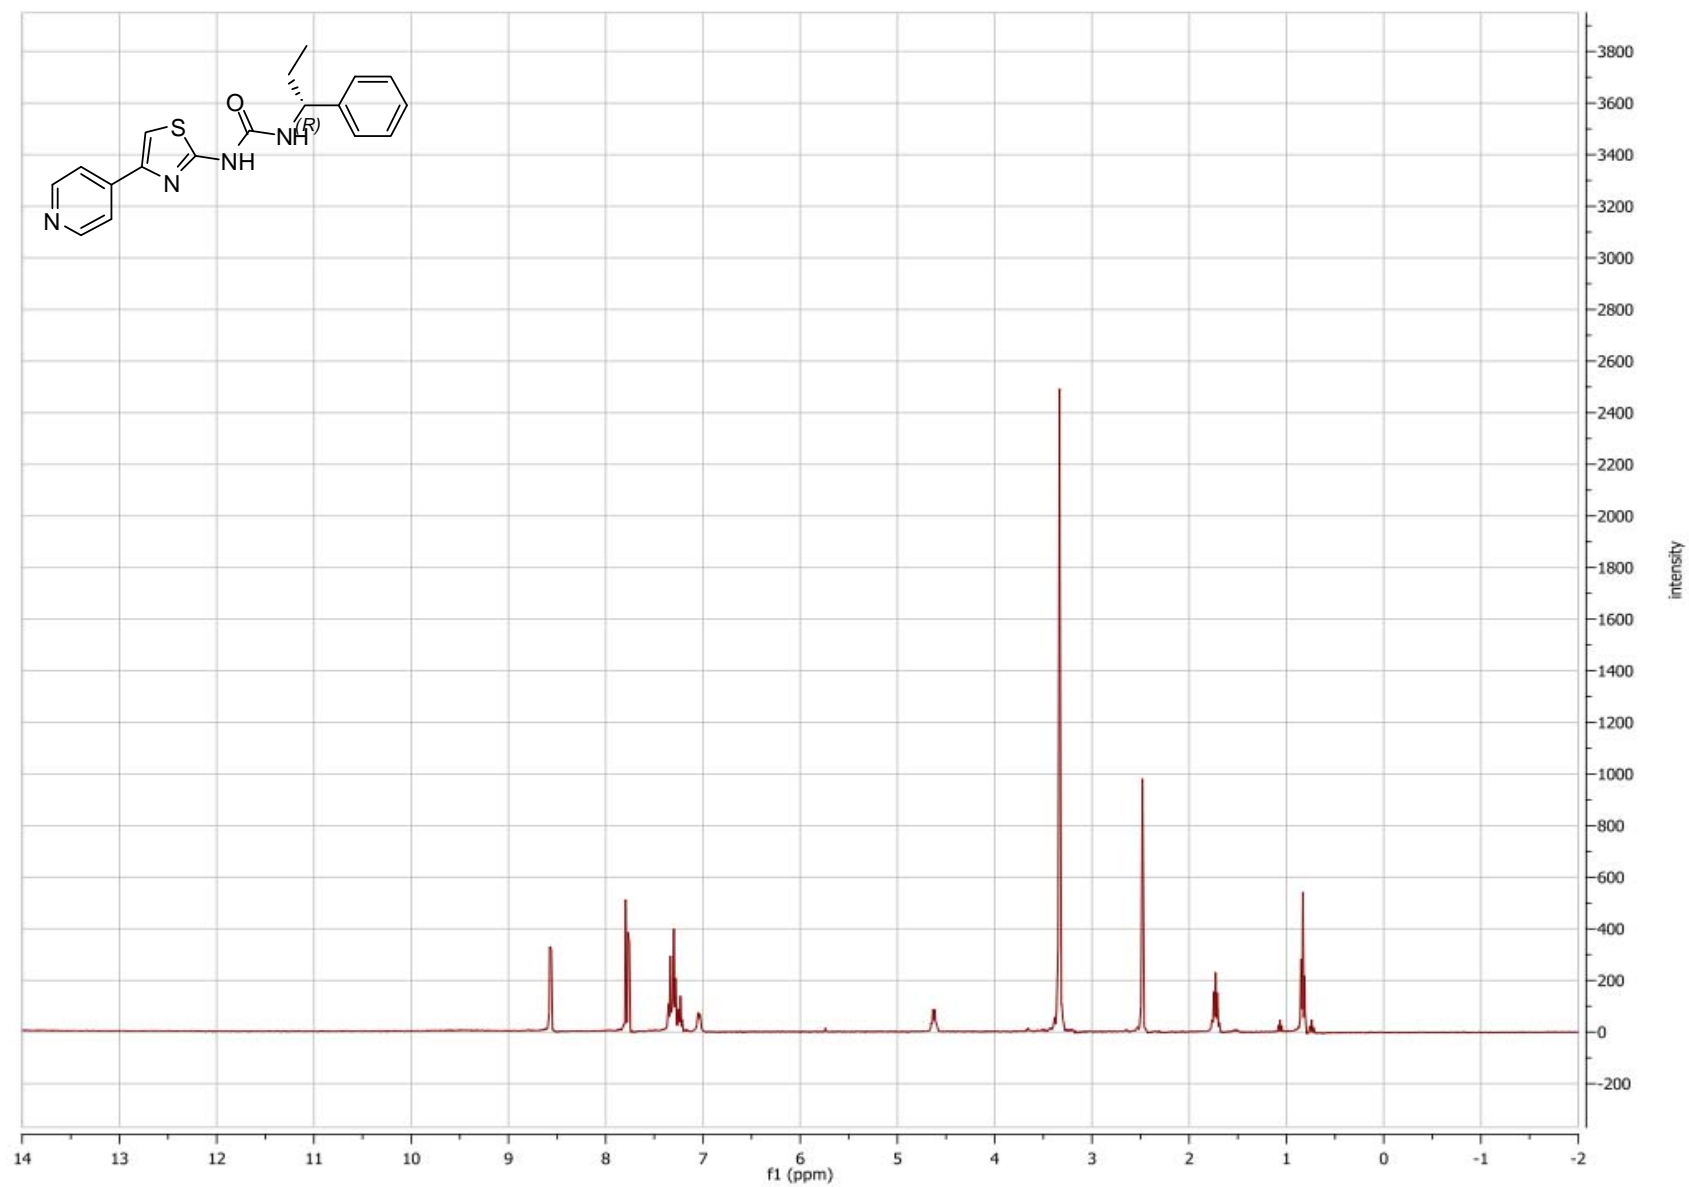



Expansion of the aromatic region of (*R*)-14c

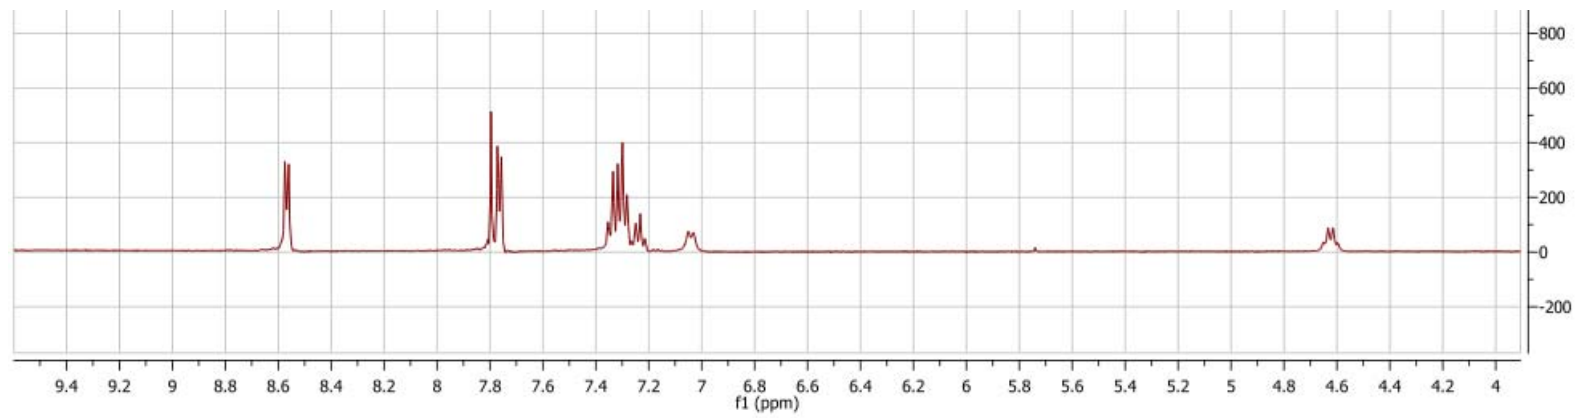

$^1\text{H}$  NMR (DMSO- $d_6$ ) spectrum of (*S*)-**14c**

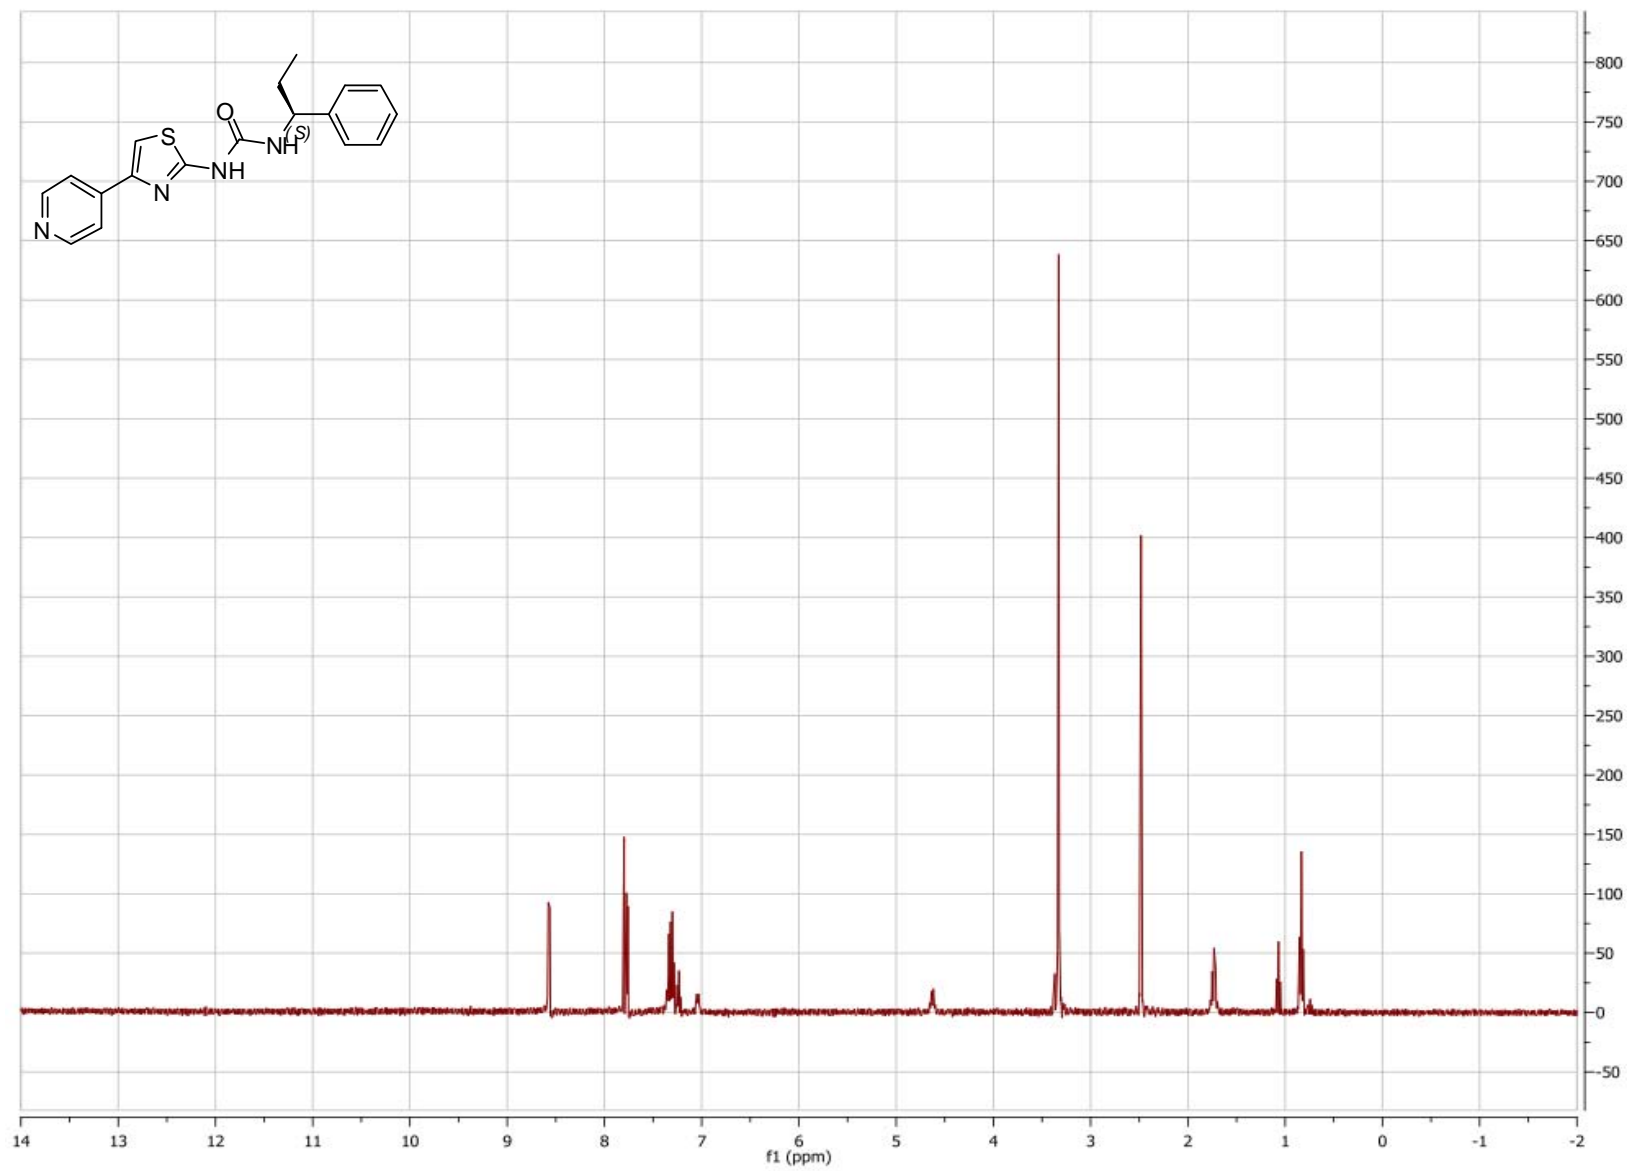

Expansion of the aromatic region of (*S*)-**14c**

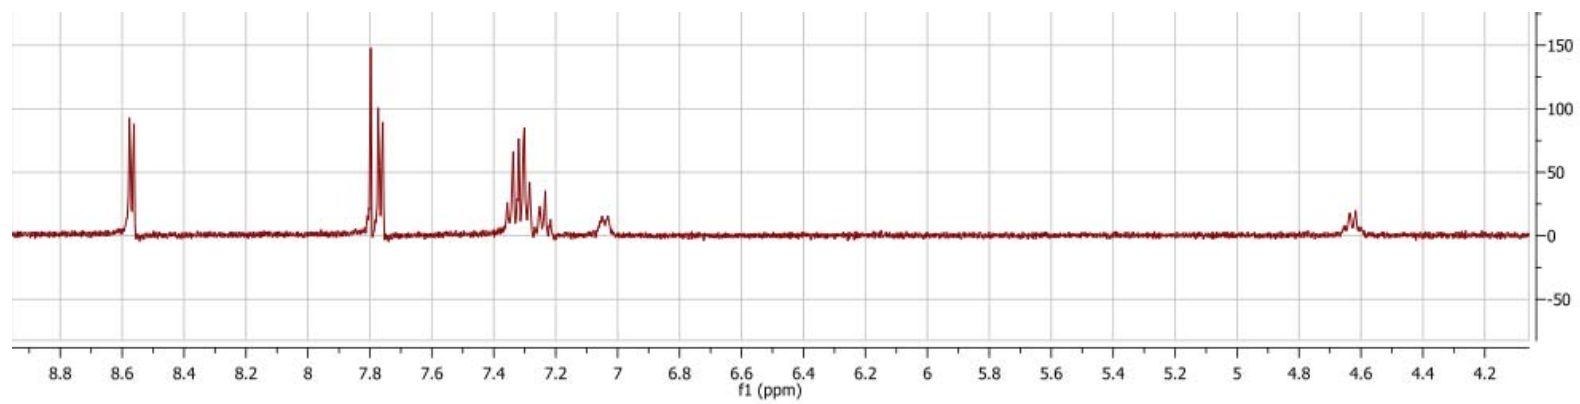

$^1\text{H}$  NMR (DMSO- $d_6$ ) spectrum of (*S*)-14d

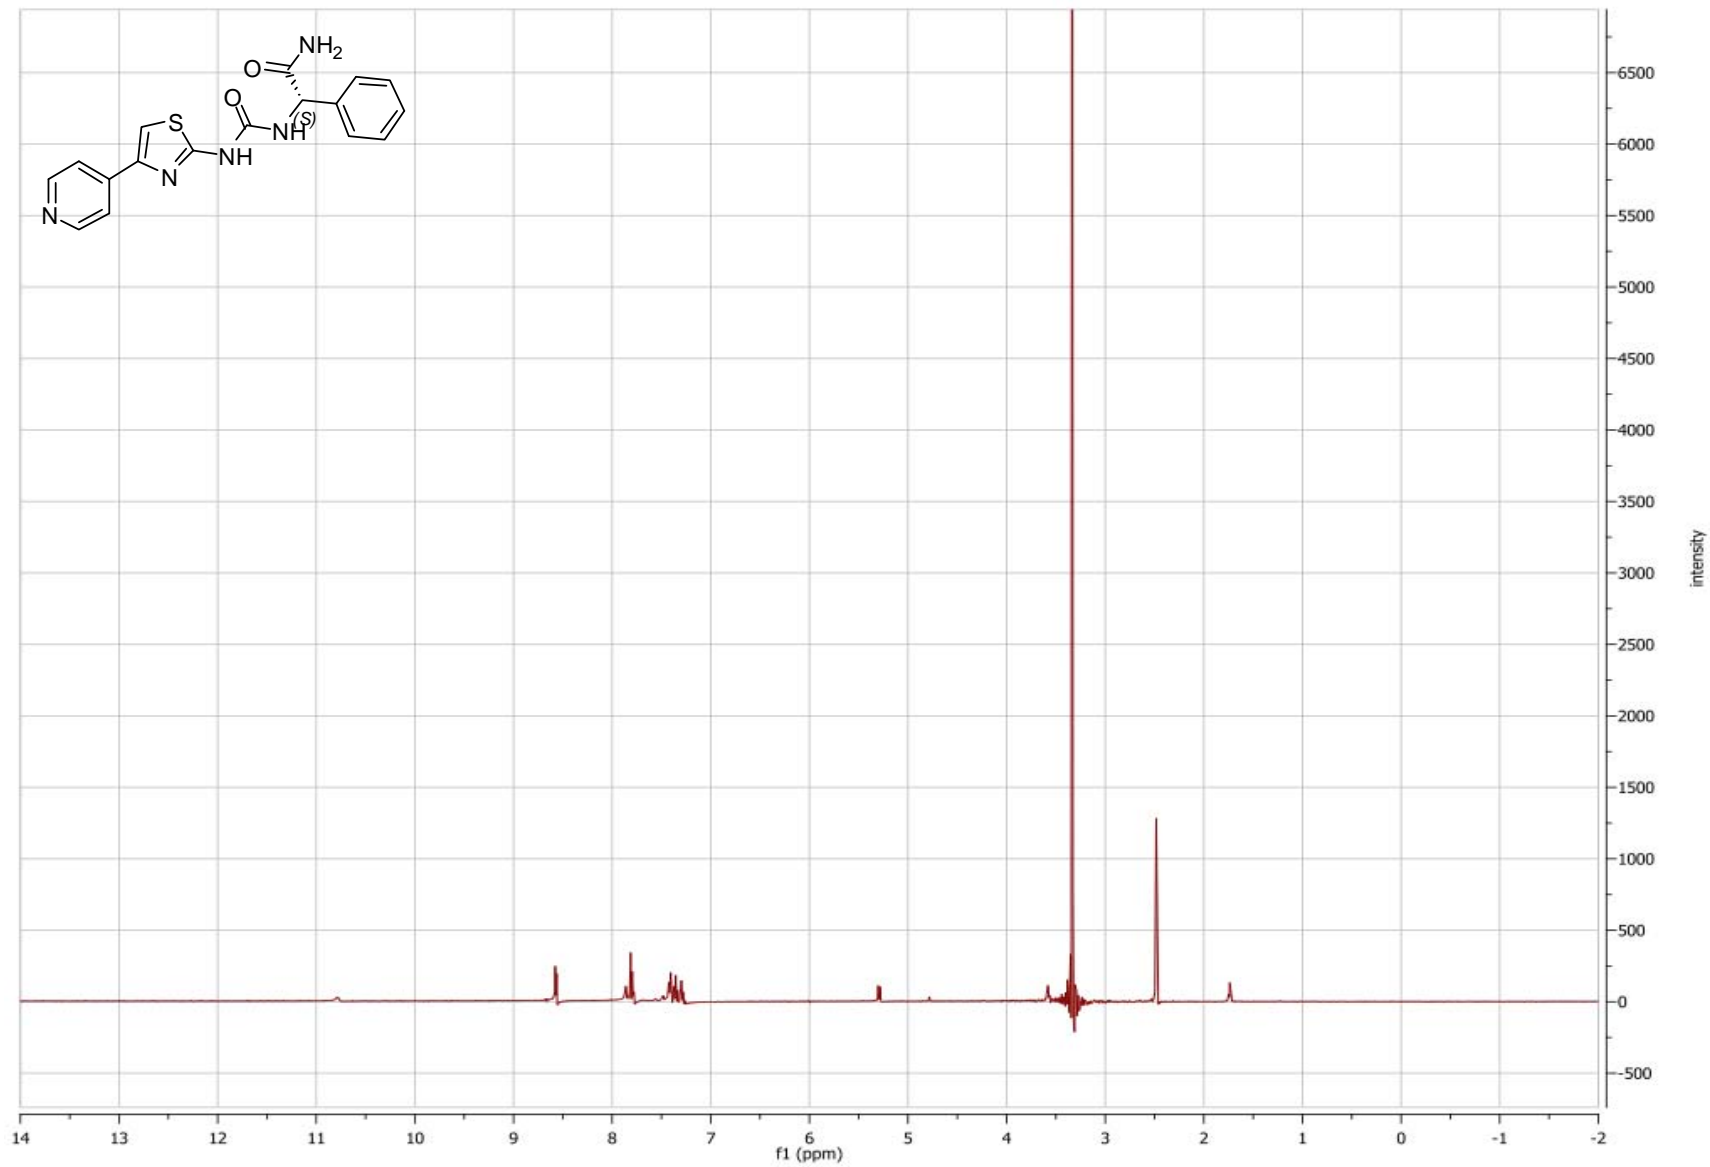

Expansion of the aromatic region of (S)-14d

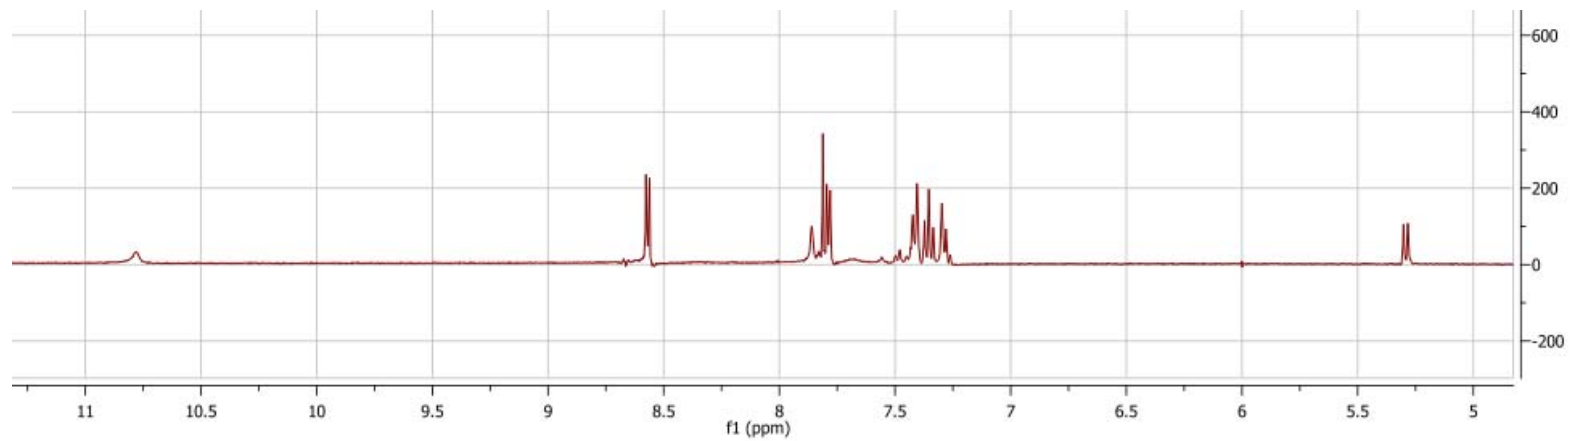

$^1\text{H}$  NMR (DMSO- $d_6$ ) spectrum of (*R*)-14d

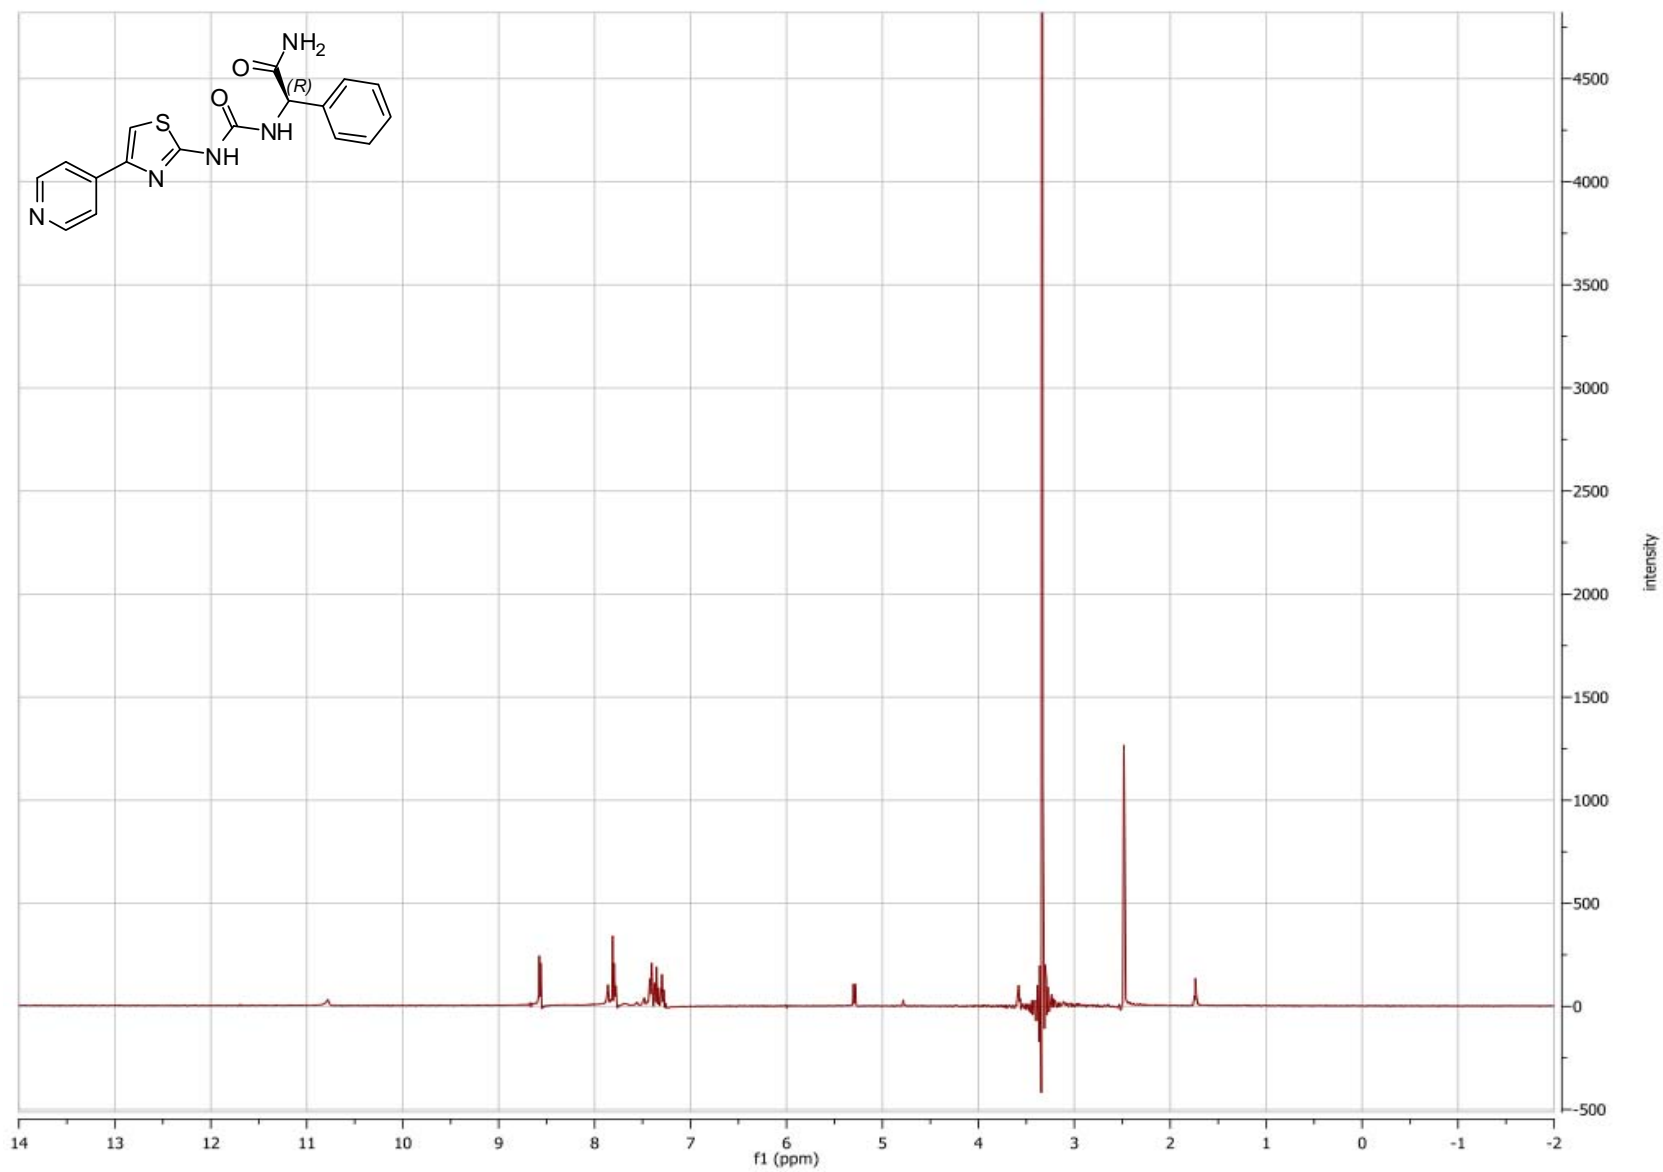

Expansion of the aromatic region of (*R*)-14d

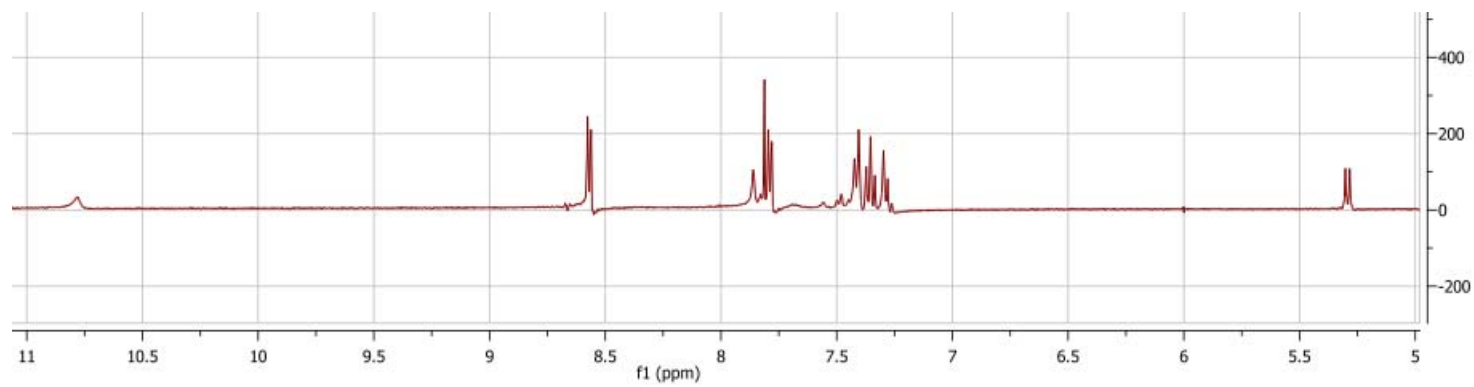

$^1\text{H}$  NMR (DMSO- $d_6$ ) spectrum of (*R*)-14e

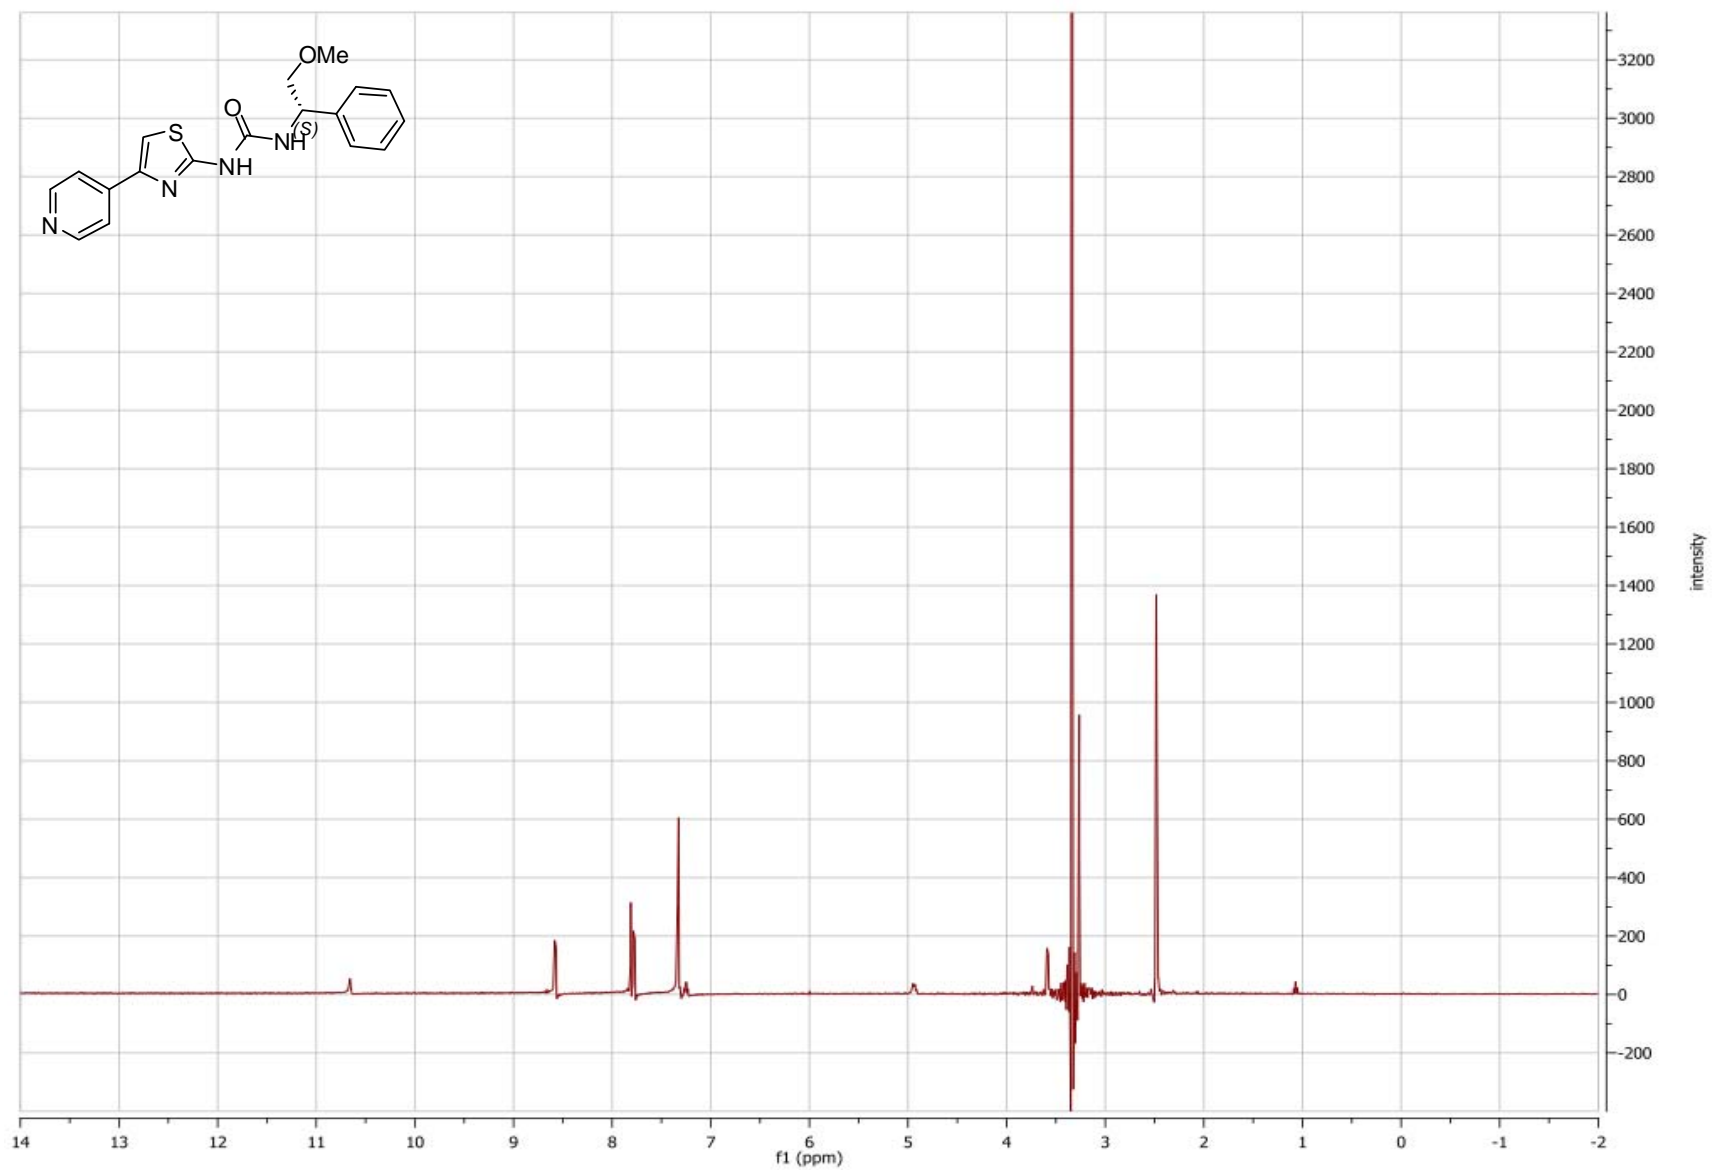



Expansion of the aromatic region of (*R*)-14e

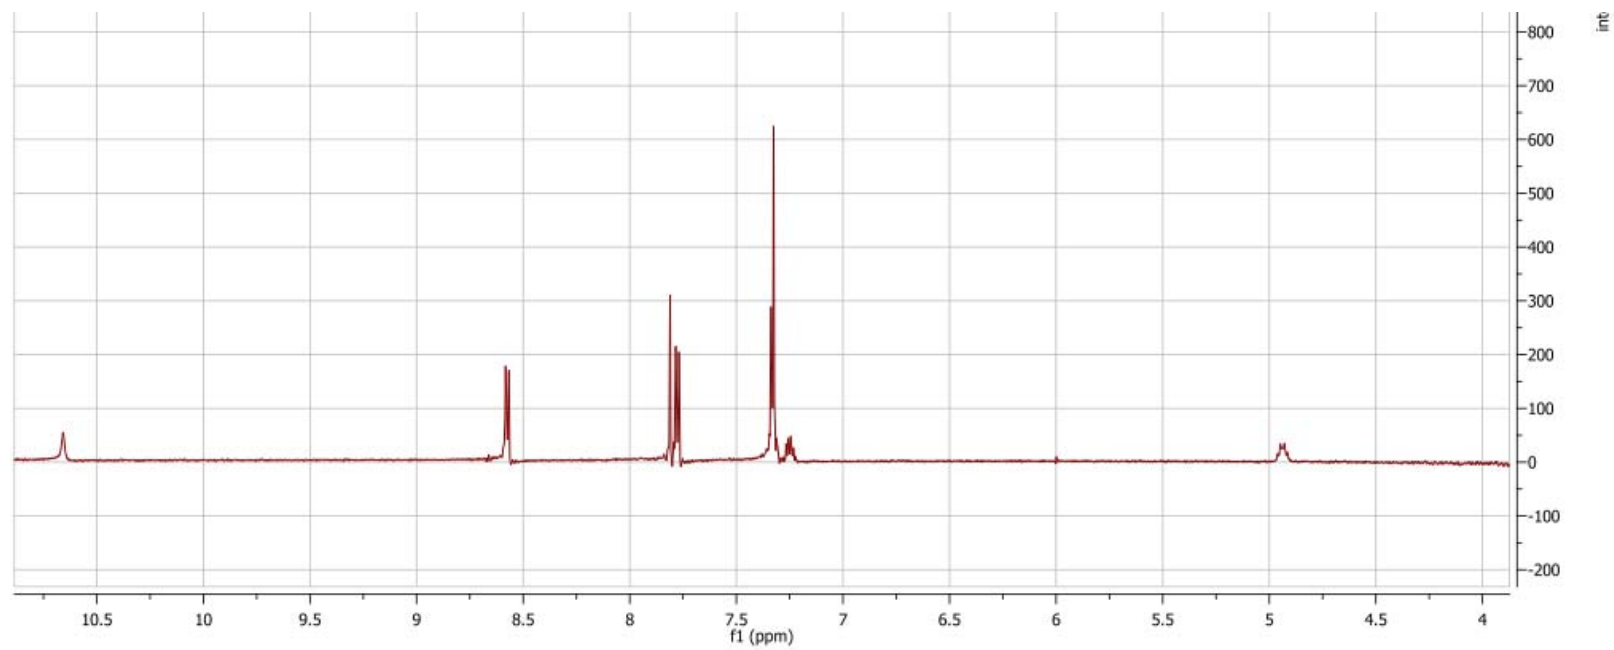

$^1\text{H}$  NMR (DMSO- $d_6$ ) spectrum of (*S*)-14e

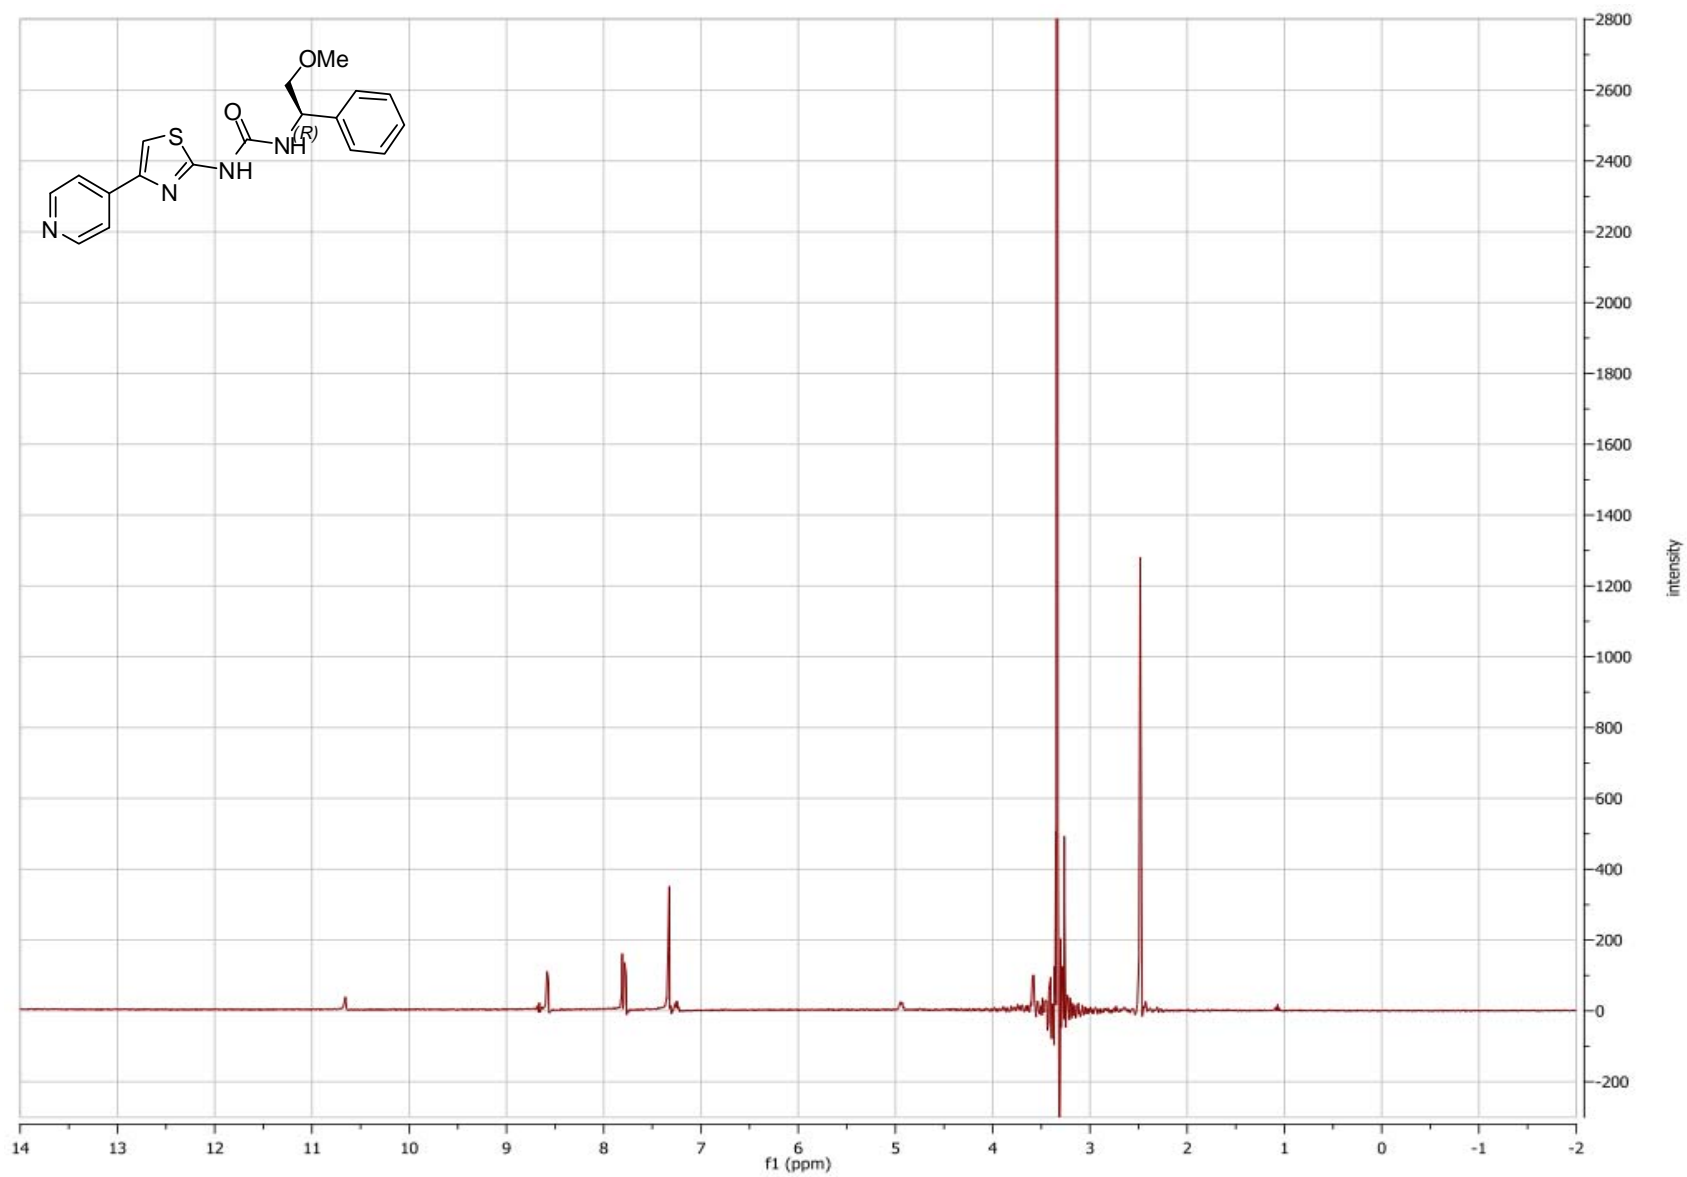

Expansion of the aromatic region of (S)-14e

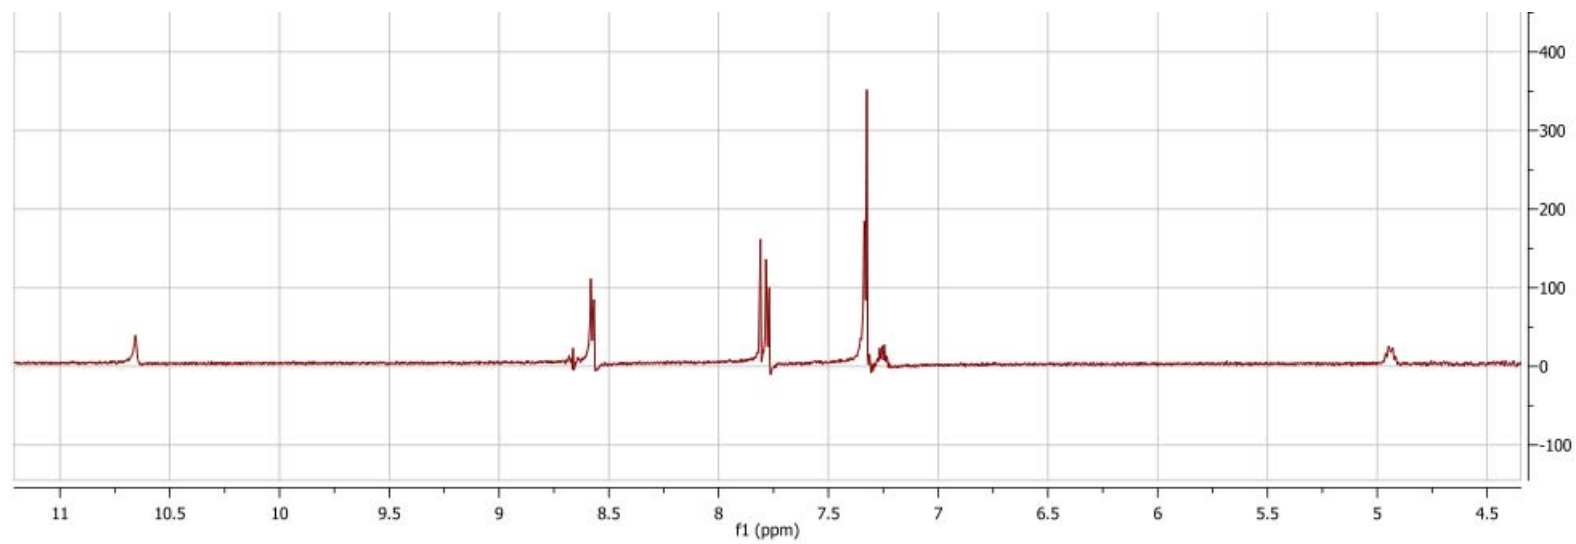

$^1\text{H}$  NMR (DMSO- $d_6$ ) spectrum of (*R*)-14f

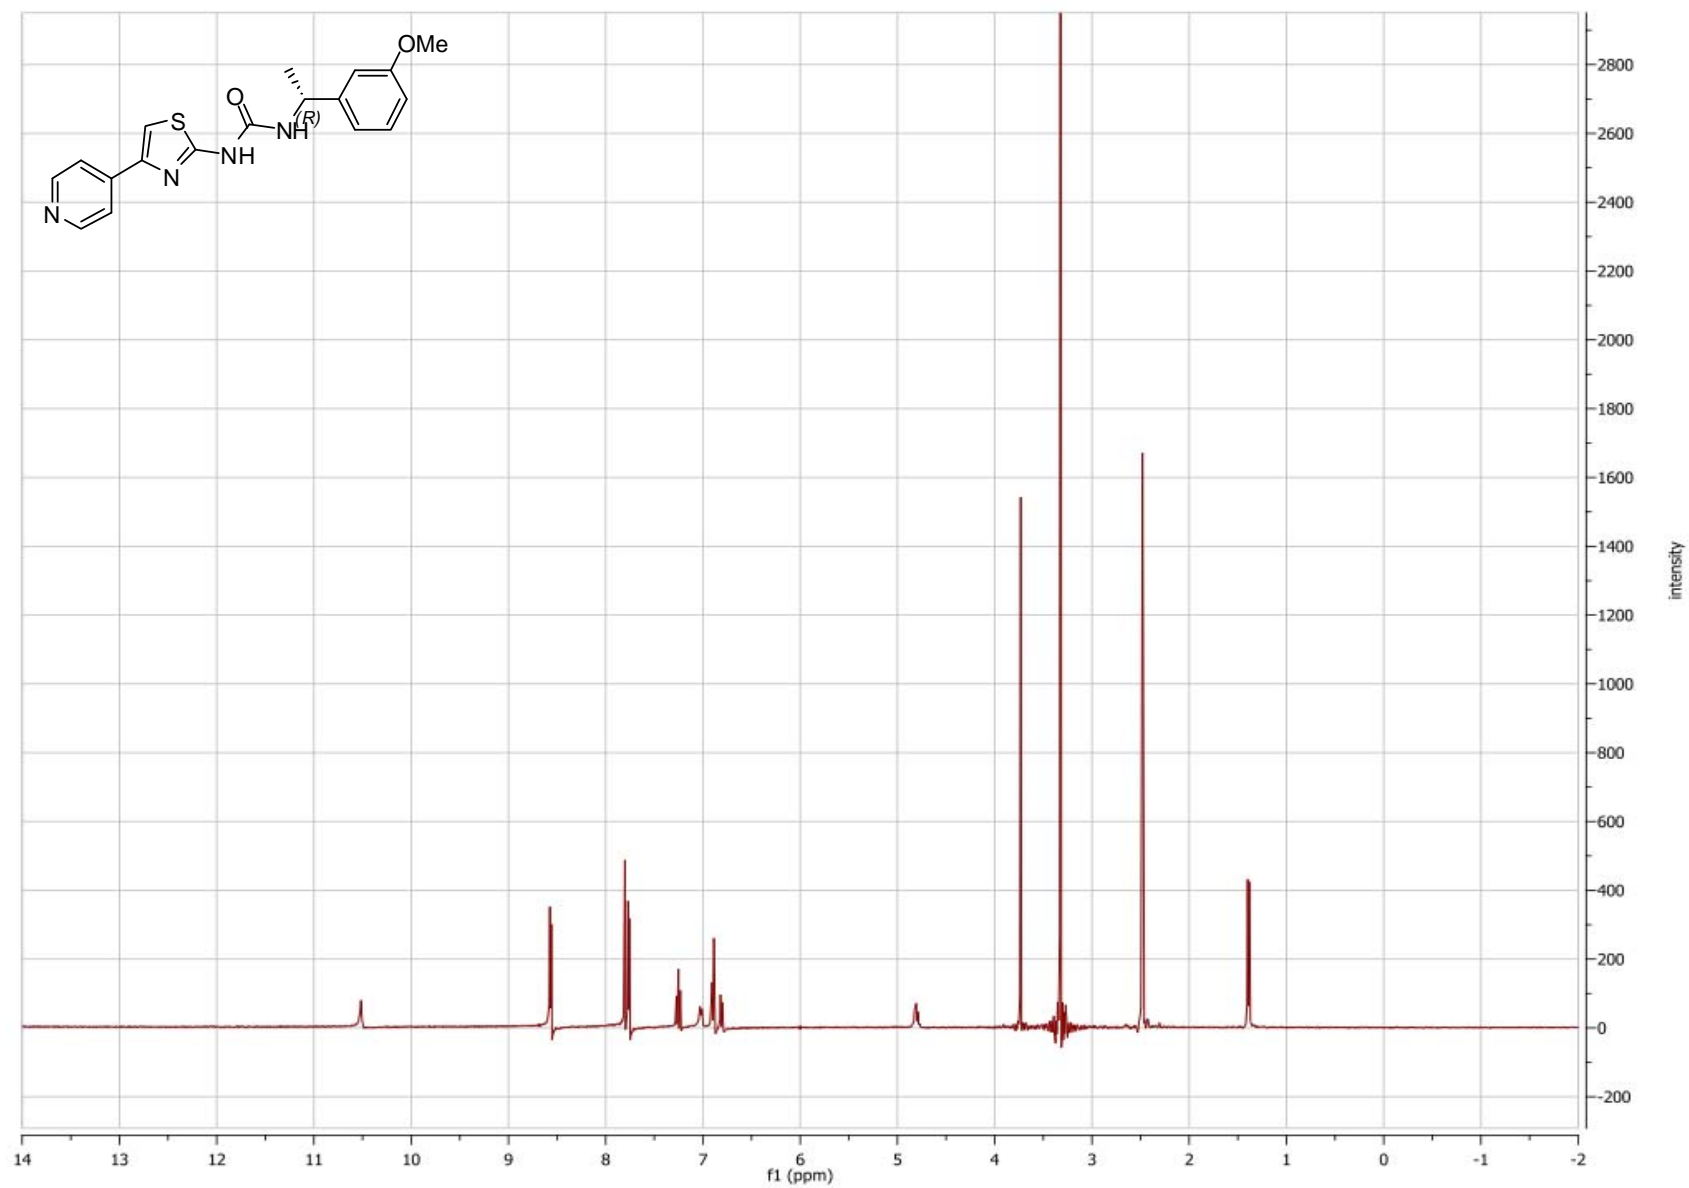

Expansion of the aromatic region of (*R*)-14f

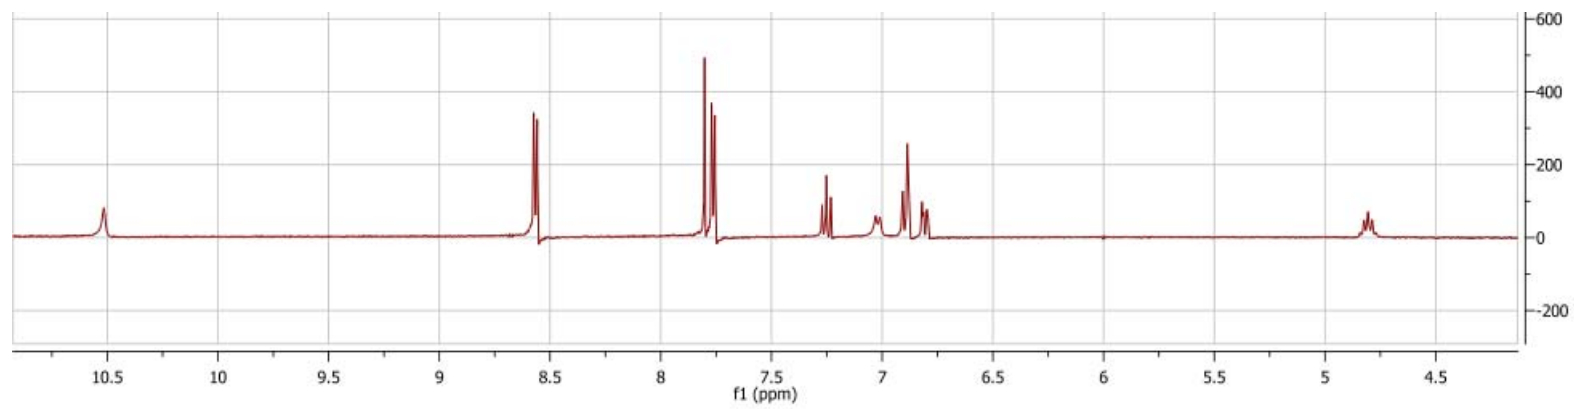

$^1\text{H}$  NMR (DMSO- $d_6$ ) spectrum of (*S*)-**14f**

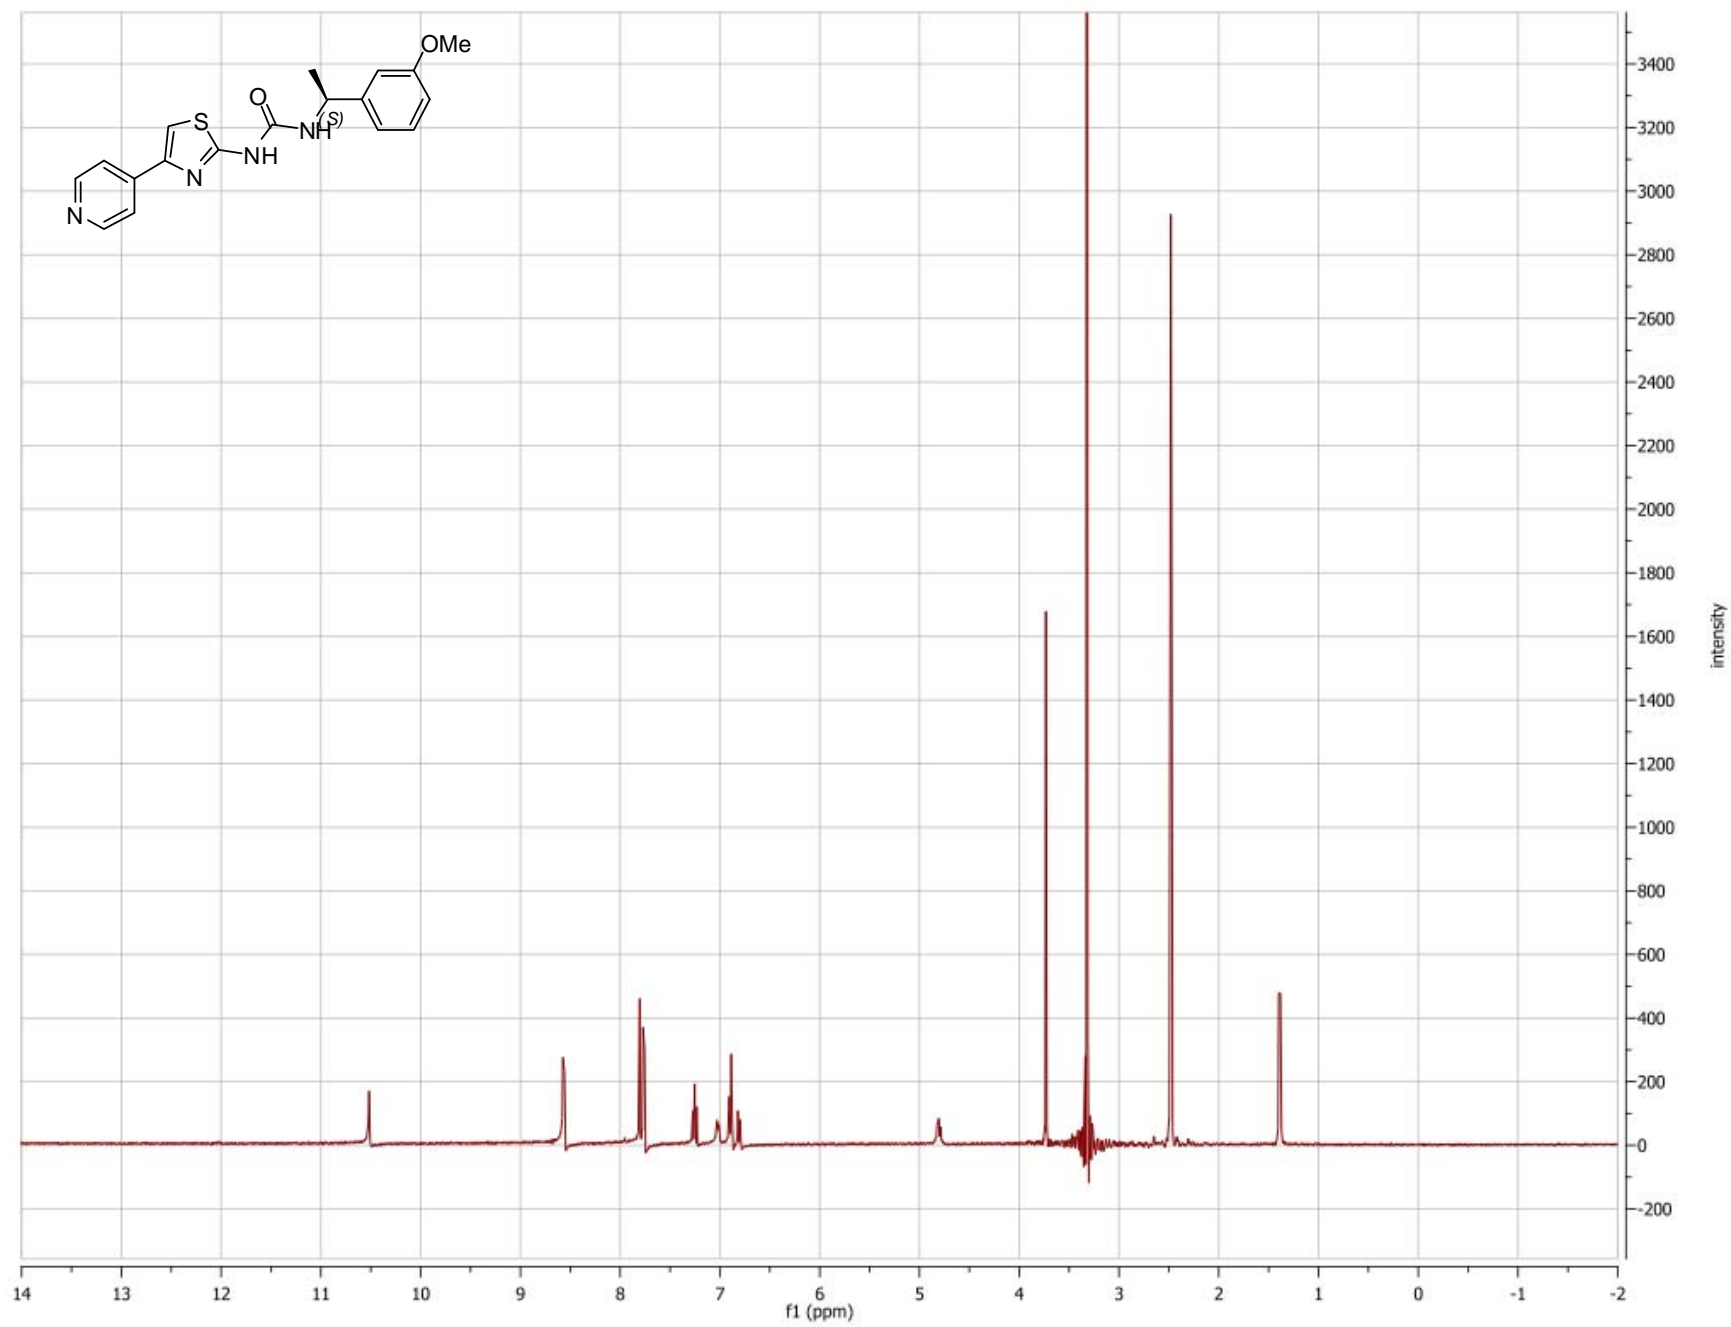

Expansion of the aromatic region of (*S*)-**14f**

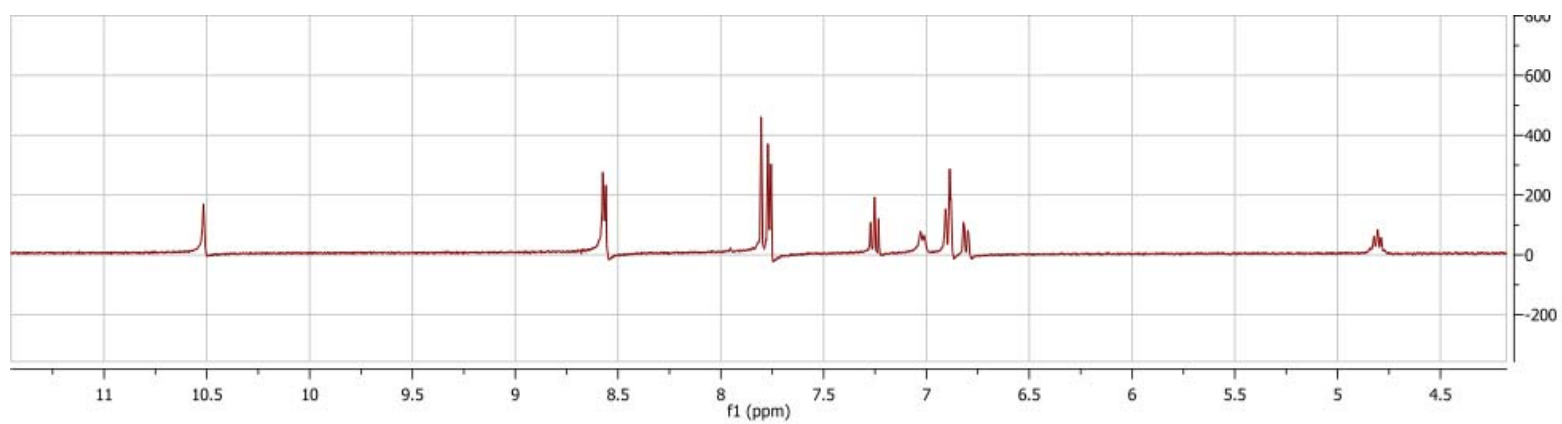

$^1\text{H}$  NMR (DMSO- $d_6$ ) spectrum of (*R*)-14g

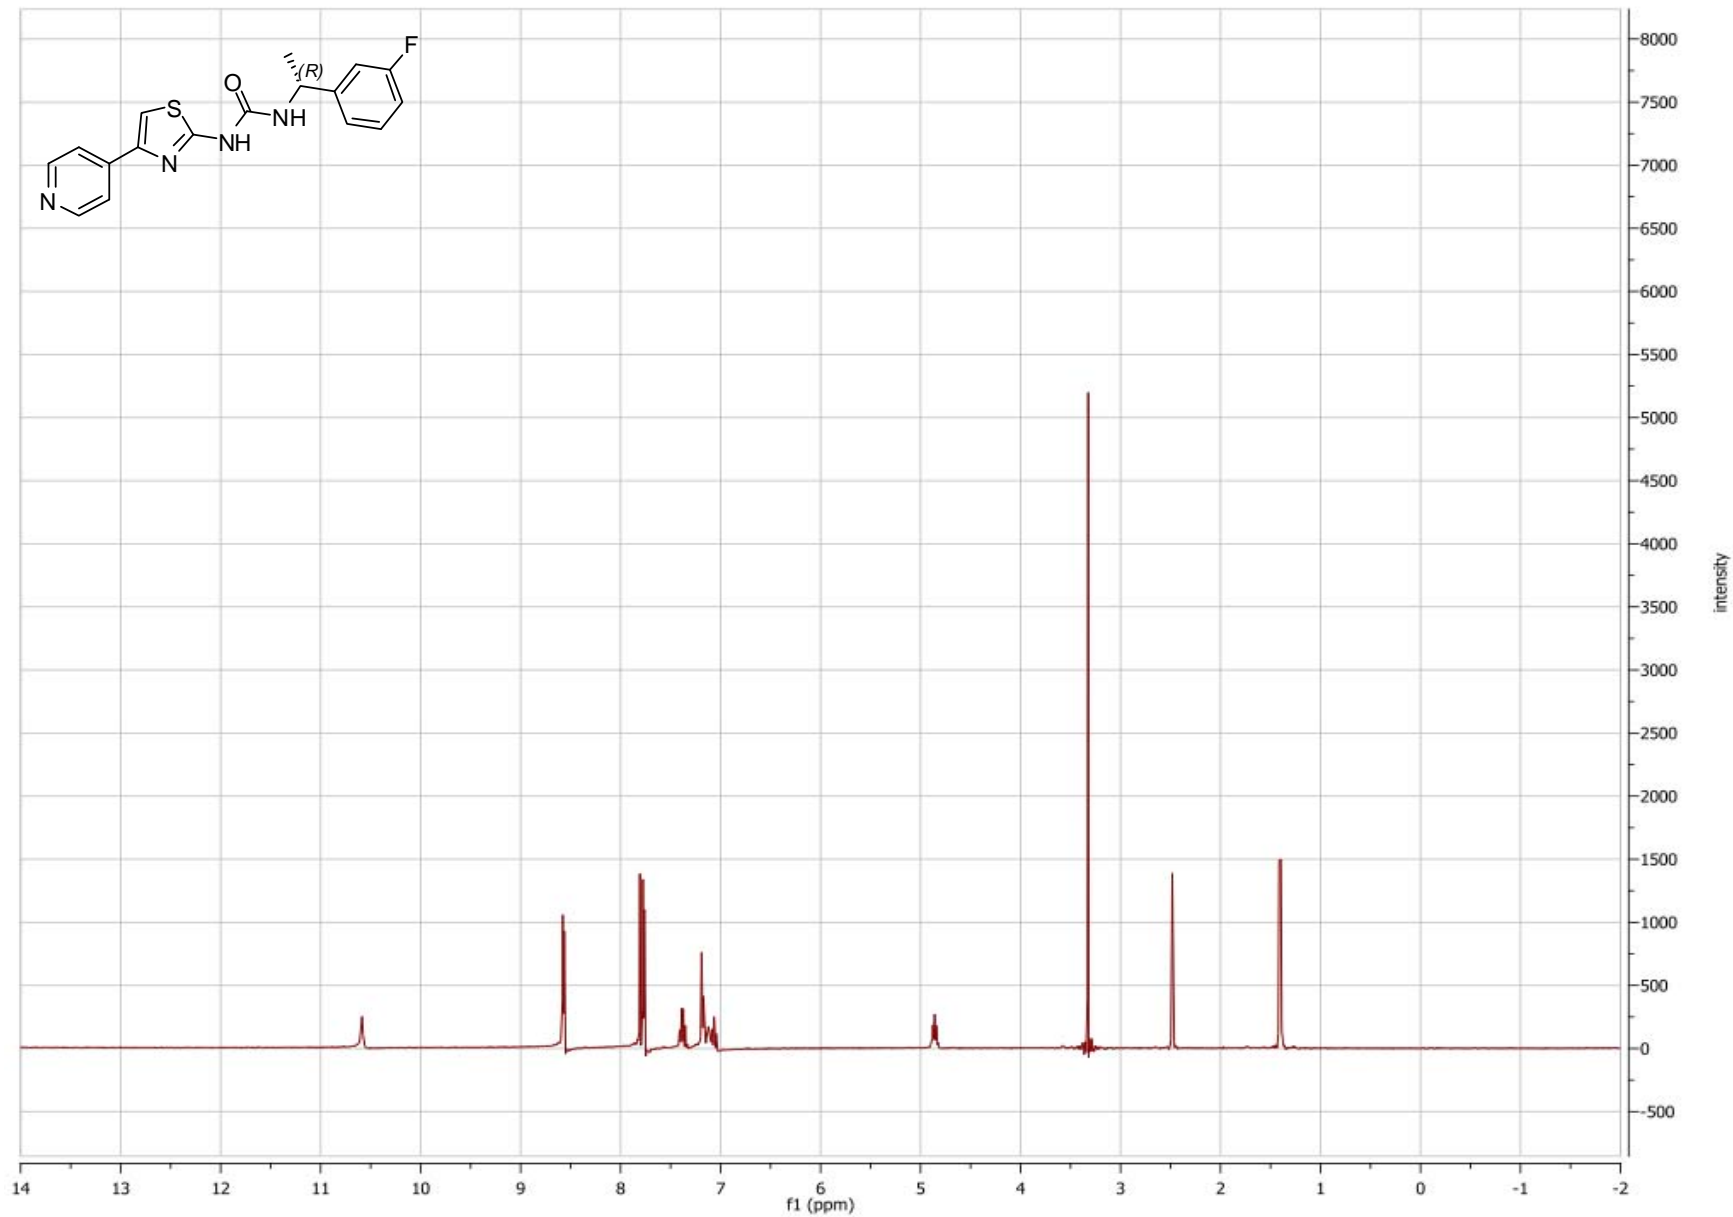



Expansion of the aromatic region of (*R*)-14g

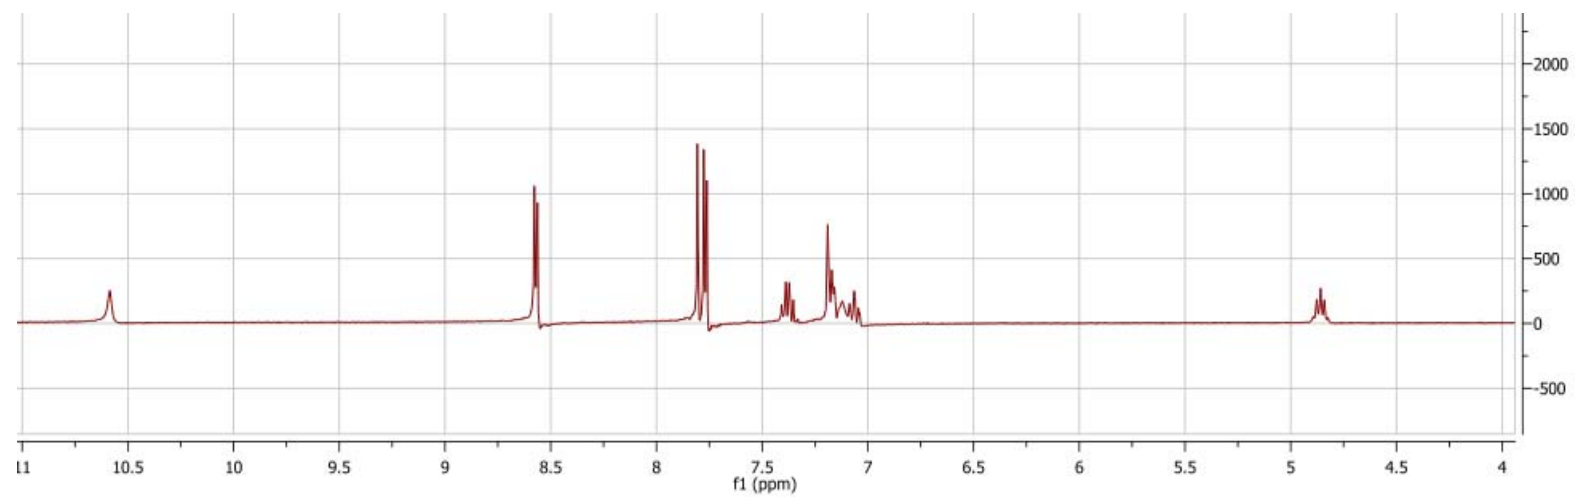

$^1\text{H}$  NMR (DMSO- $d_6$ ) spectrum of (*S*)-**14g**

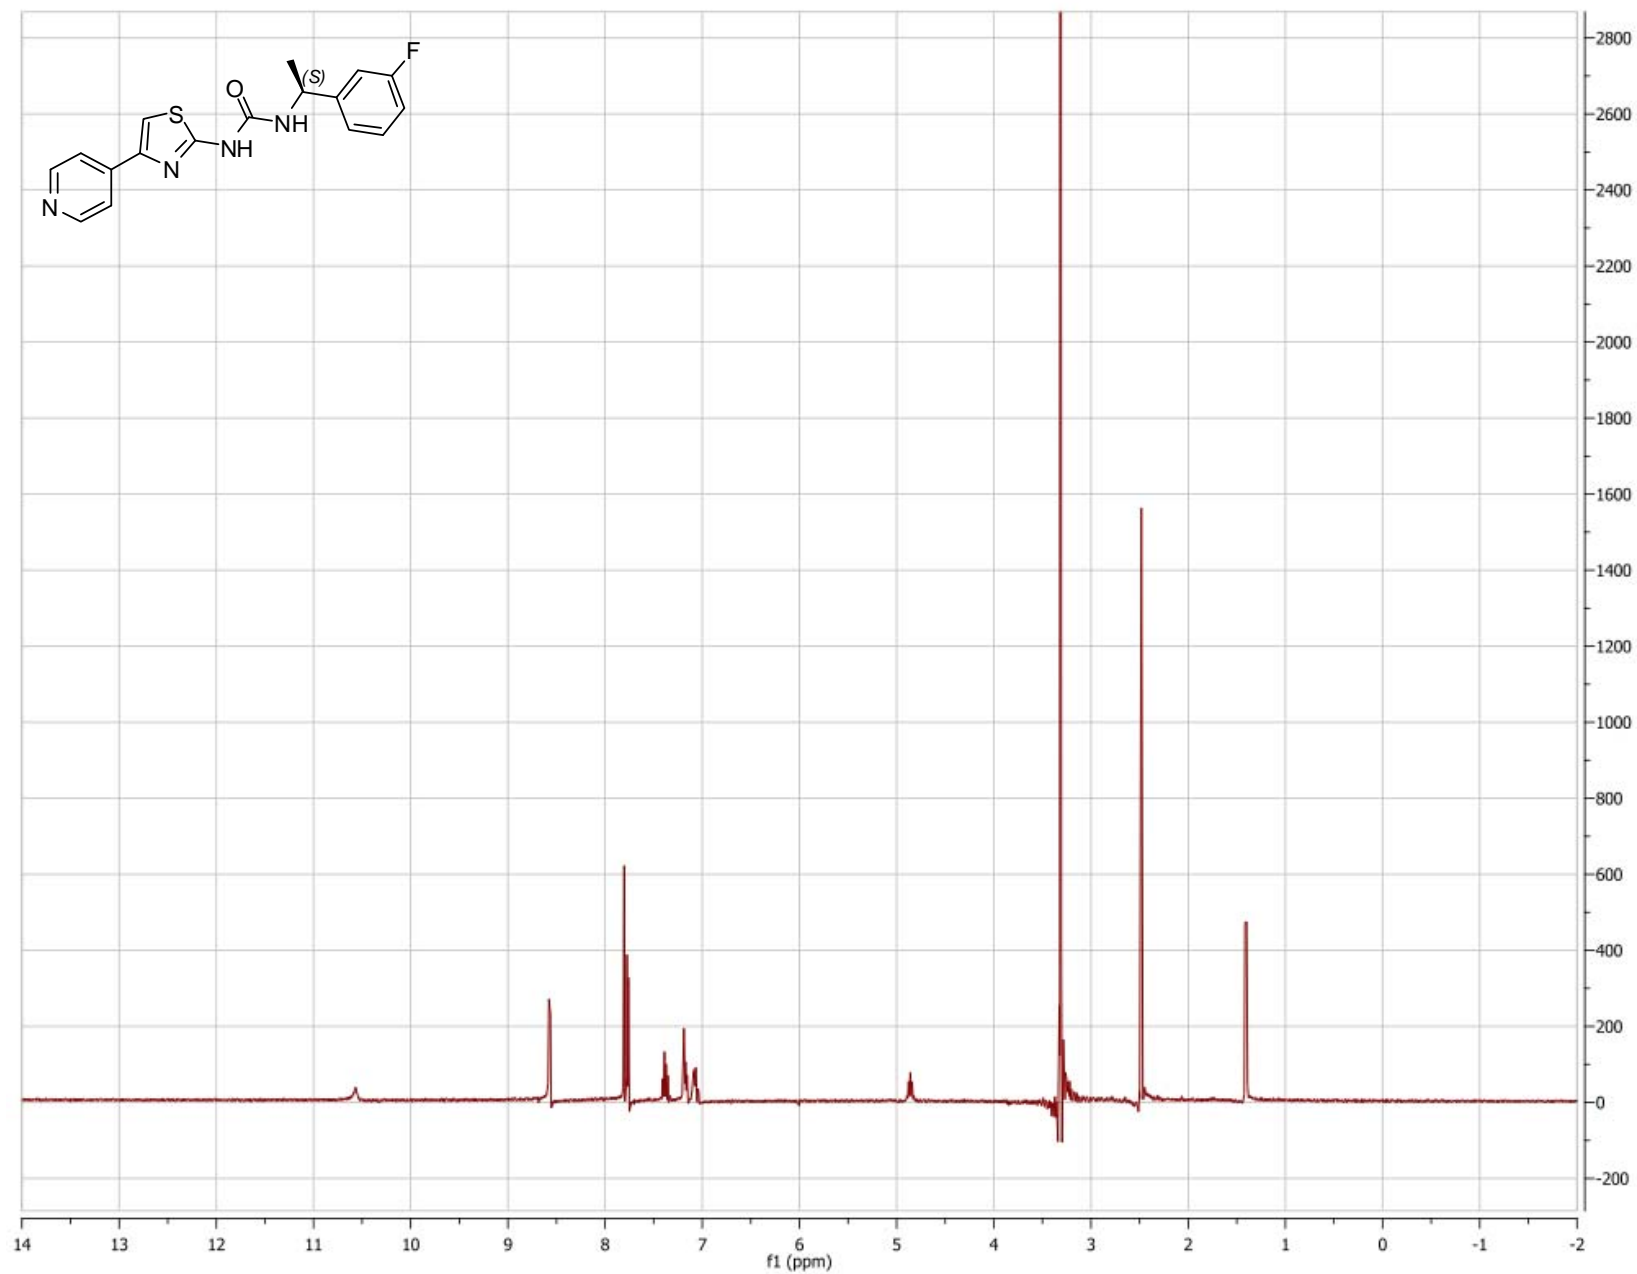

Expansion of the aromatic region of (*S*)-14g

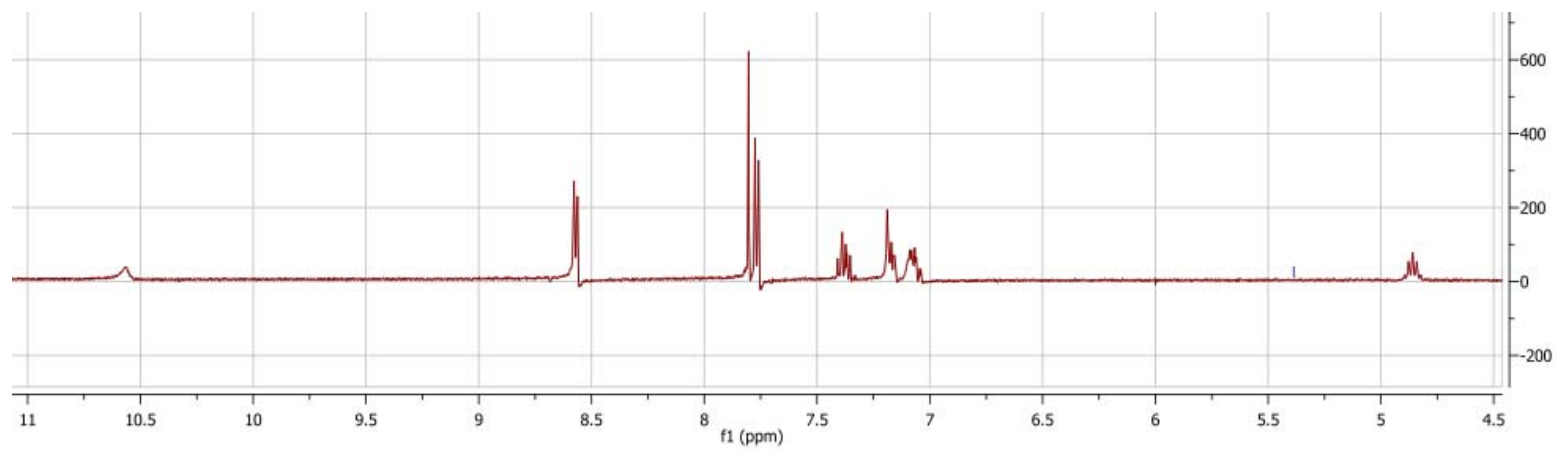

$^1\text{H}$  NMR (DMSO- $d_6$ ) spectrum of (*R,S*)-14g

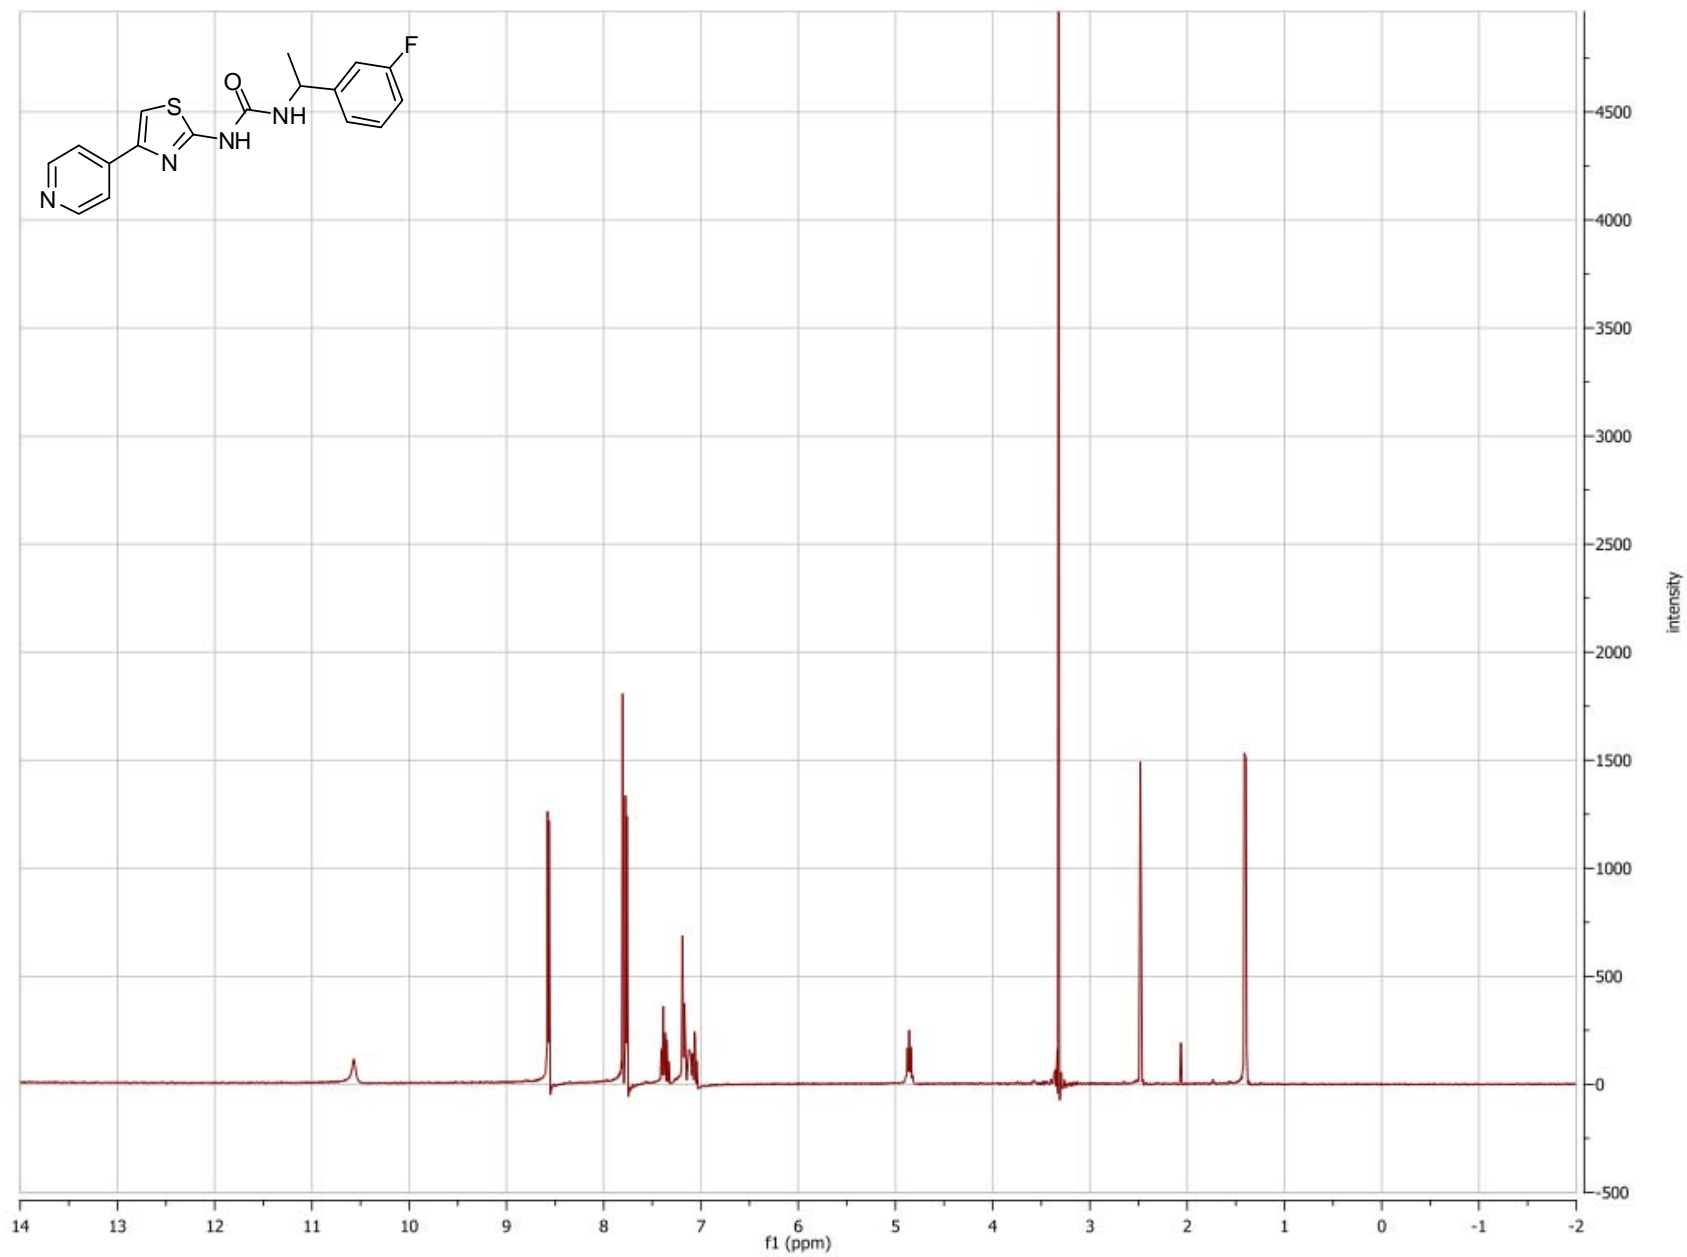

Expansion of the aromatic region of (*R,S*)-**14g**

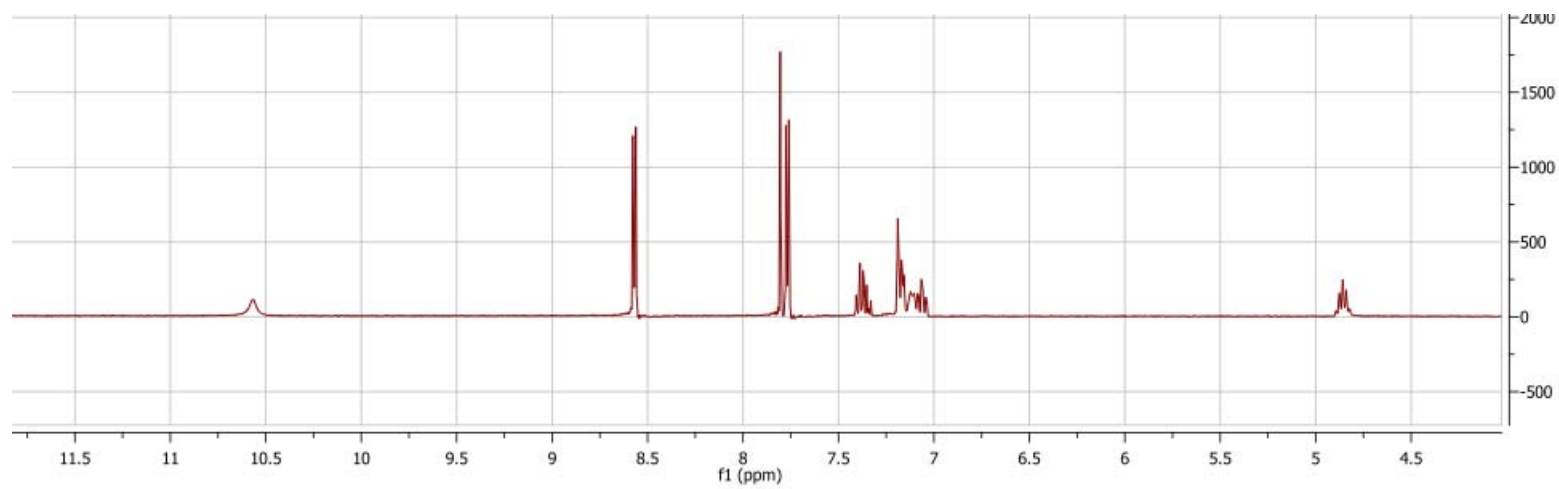

$^1\text{H}$  NMR (DMSO- $d_6$ ) spectrum of (*R*)-14h

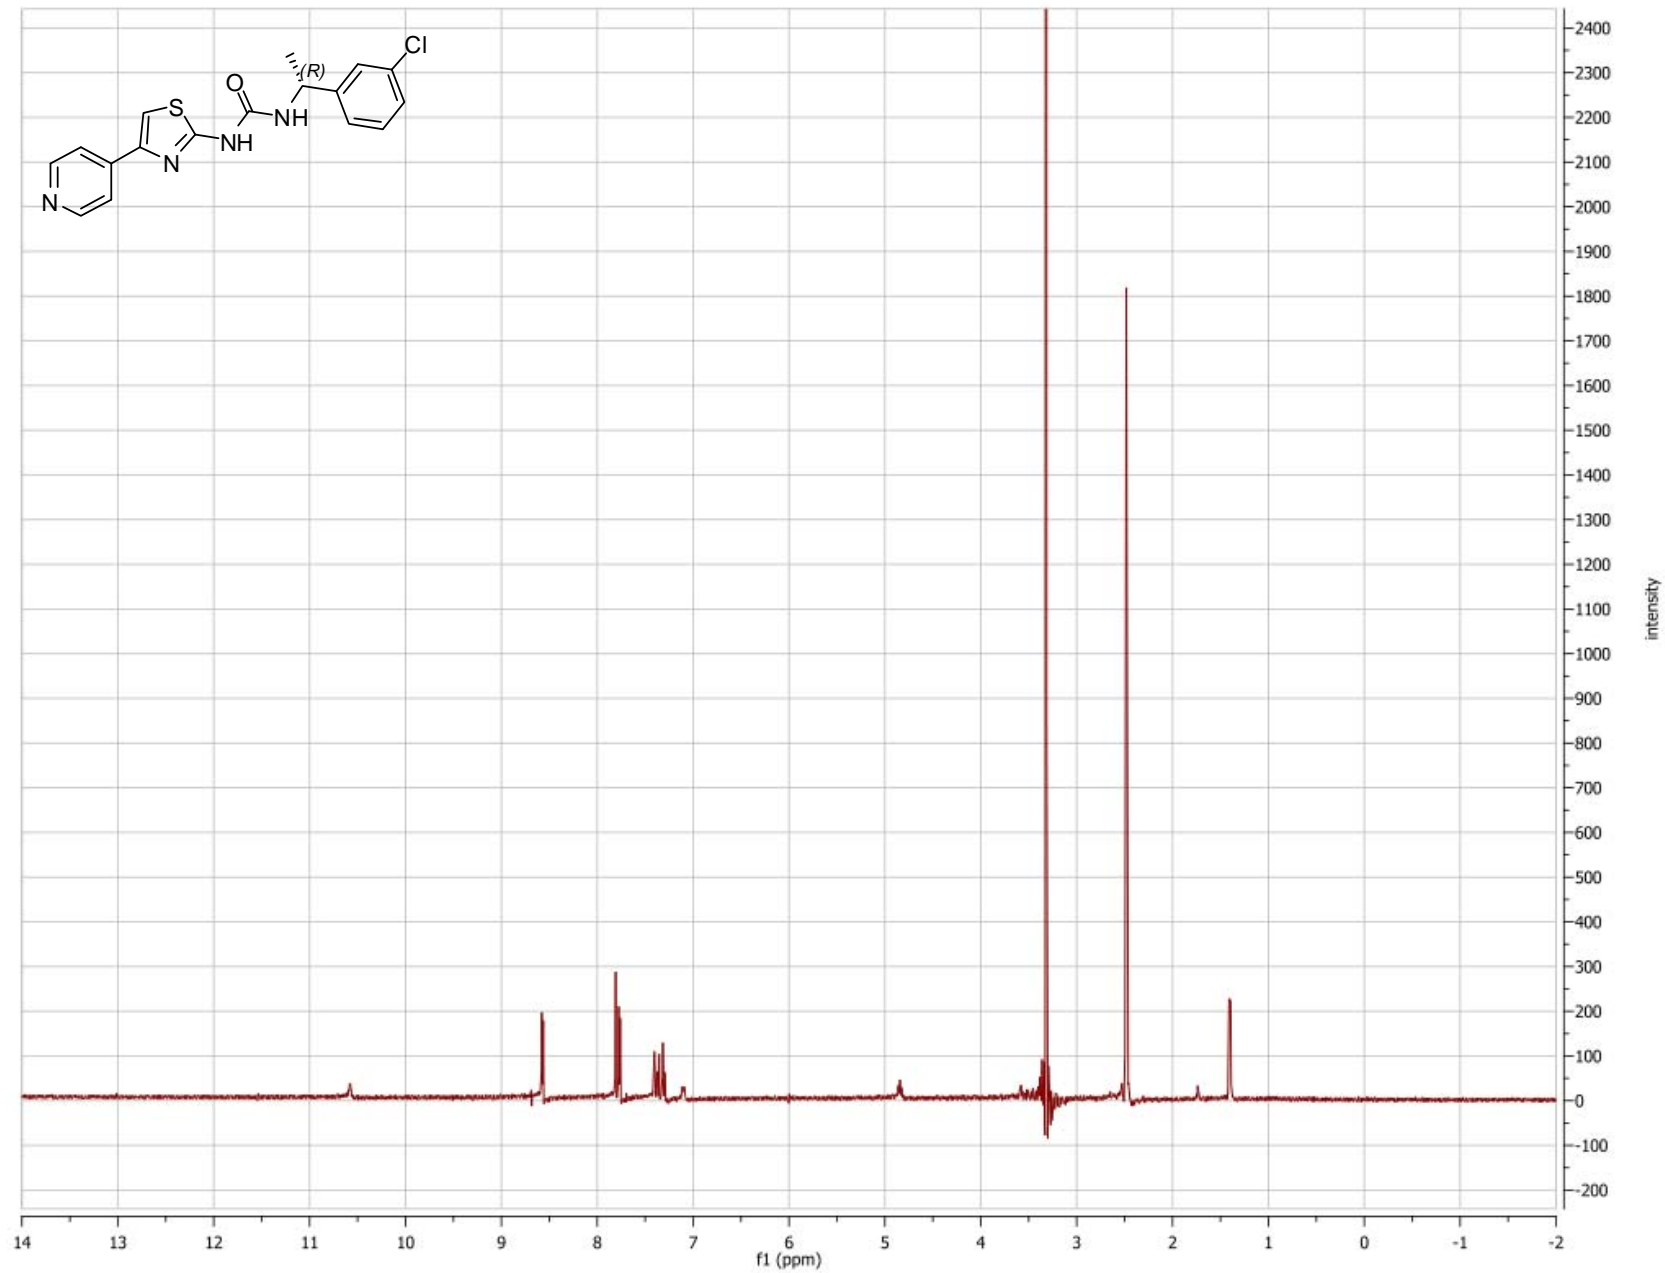

Expansion of the aromatic region of (*R*)-14h

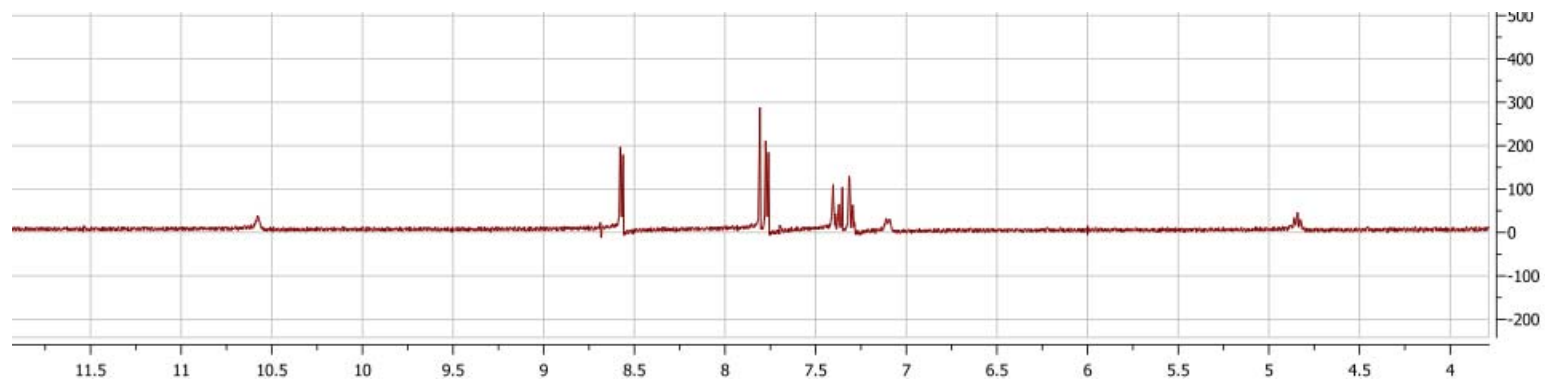

$^1\text{H}$  NMR (DMSO- $d_6$ ) spectrum of (*S*)-**14g**

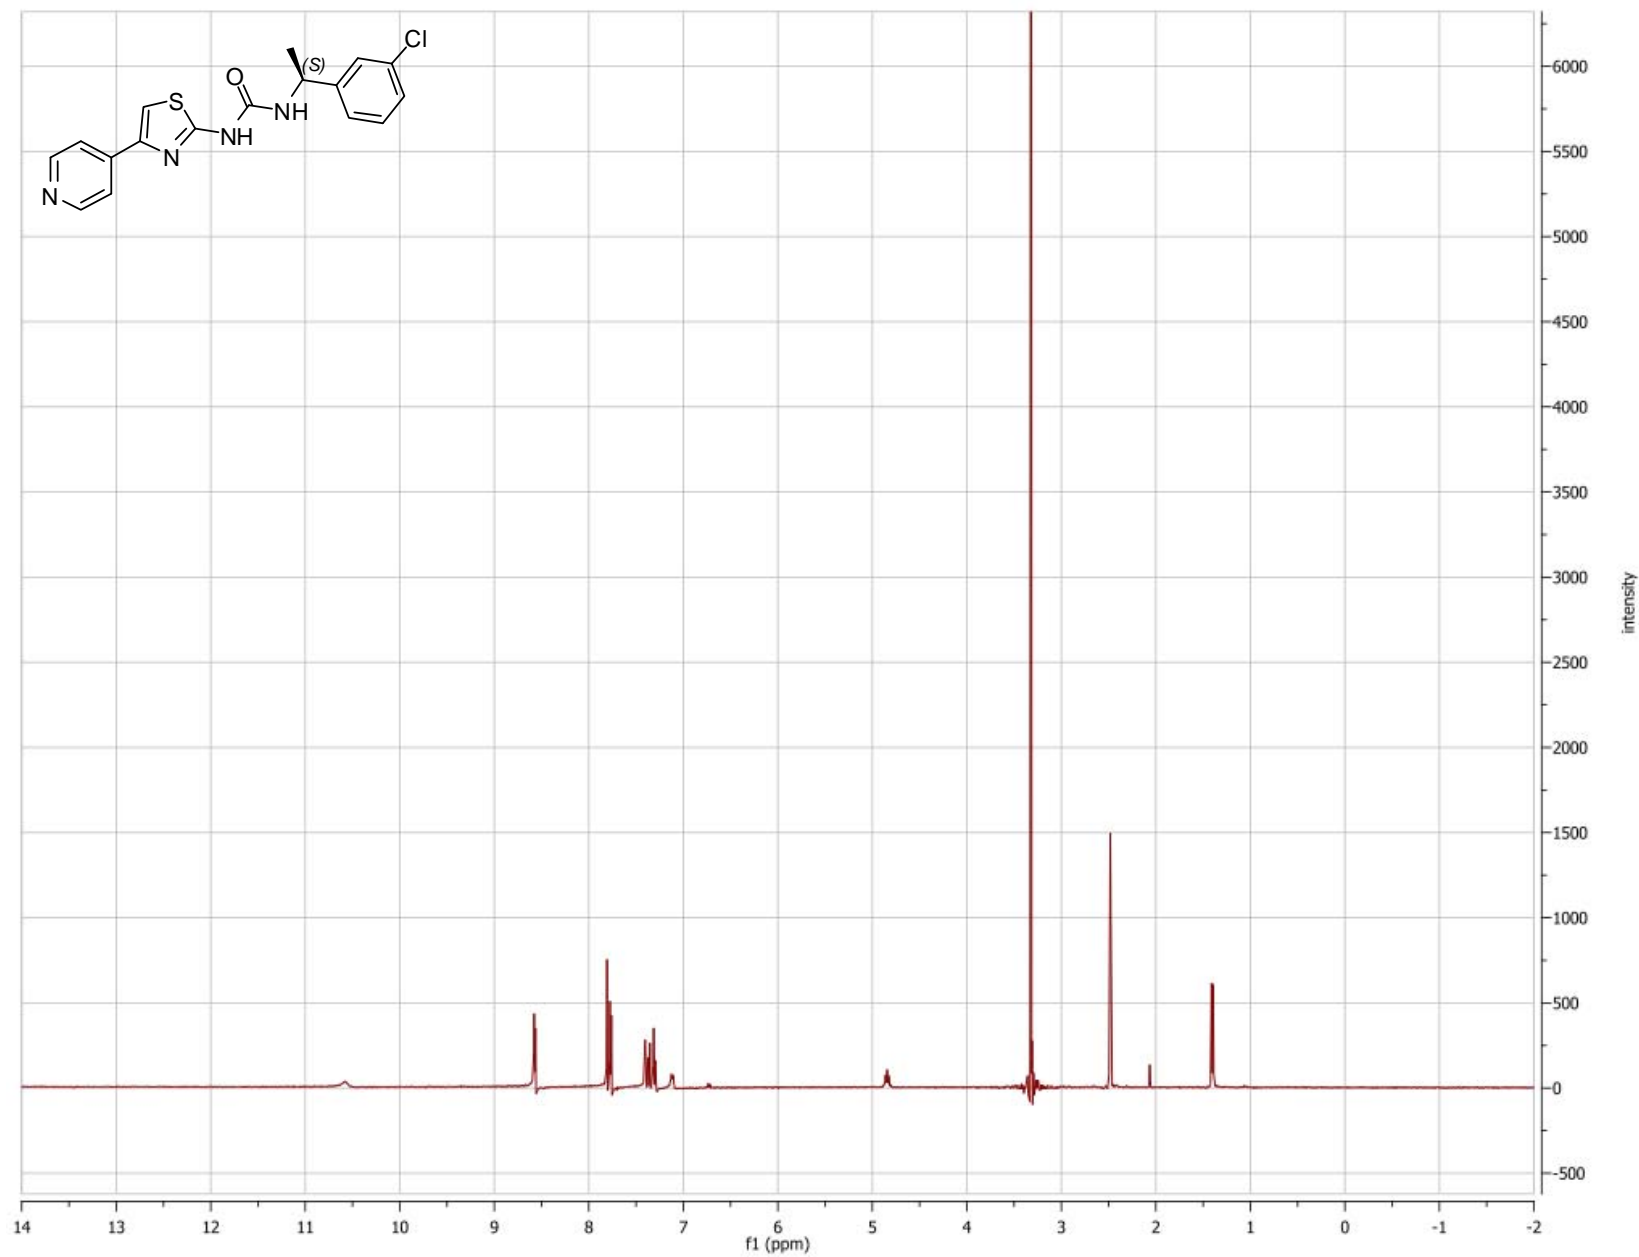



Expansion of the aromatic region of (S)-14g

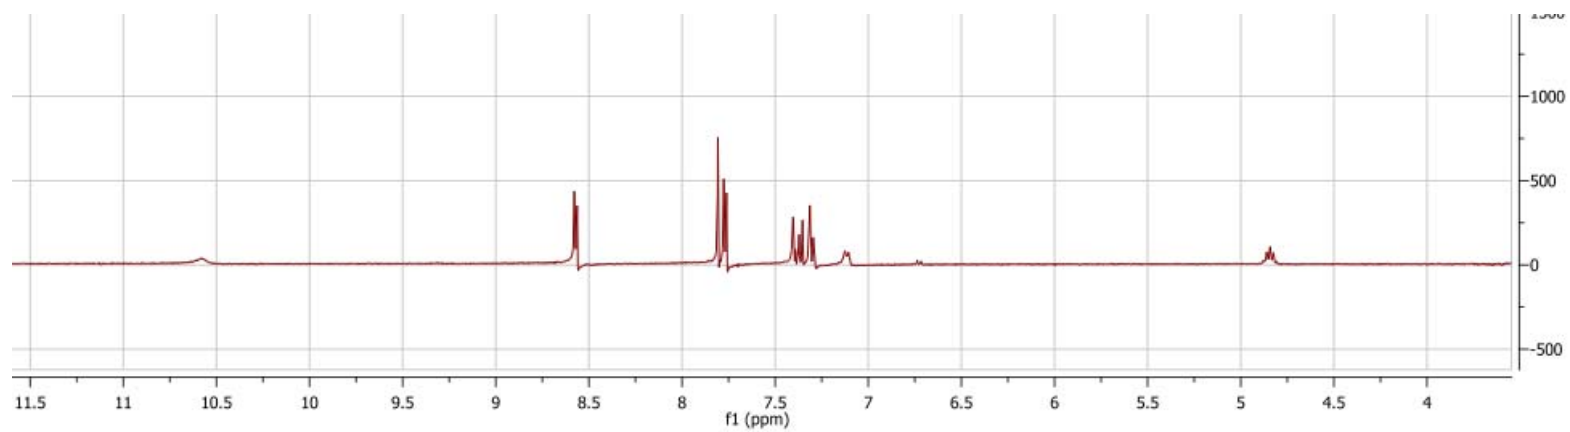

$^1\text{H}$  NMR (DMSO- $d_6$ ) spectrum of (*R*)-**14i**

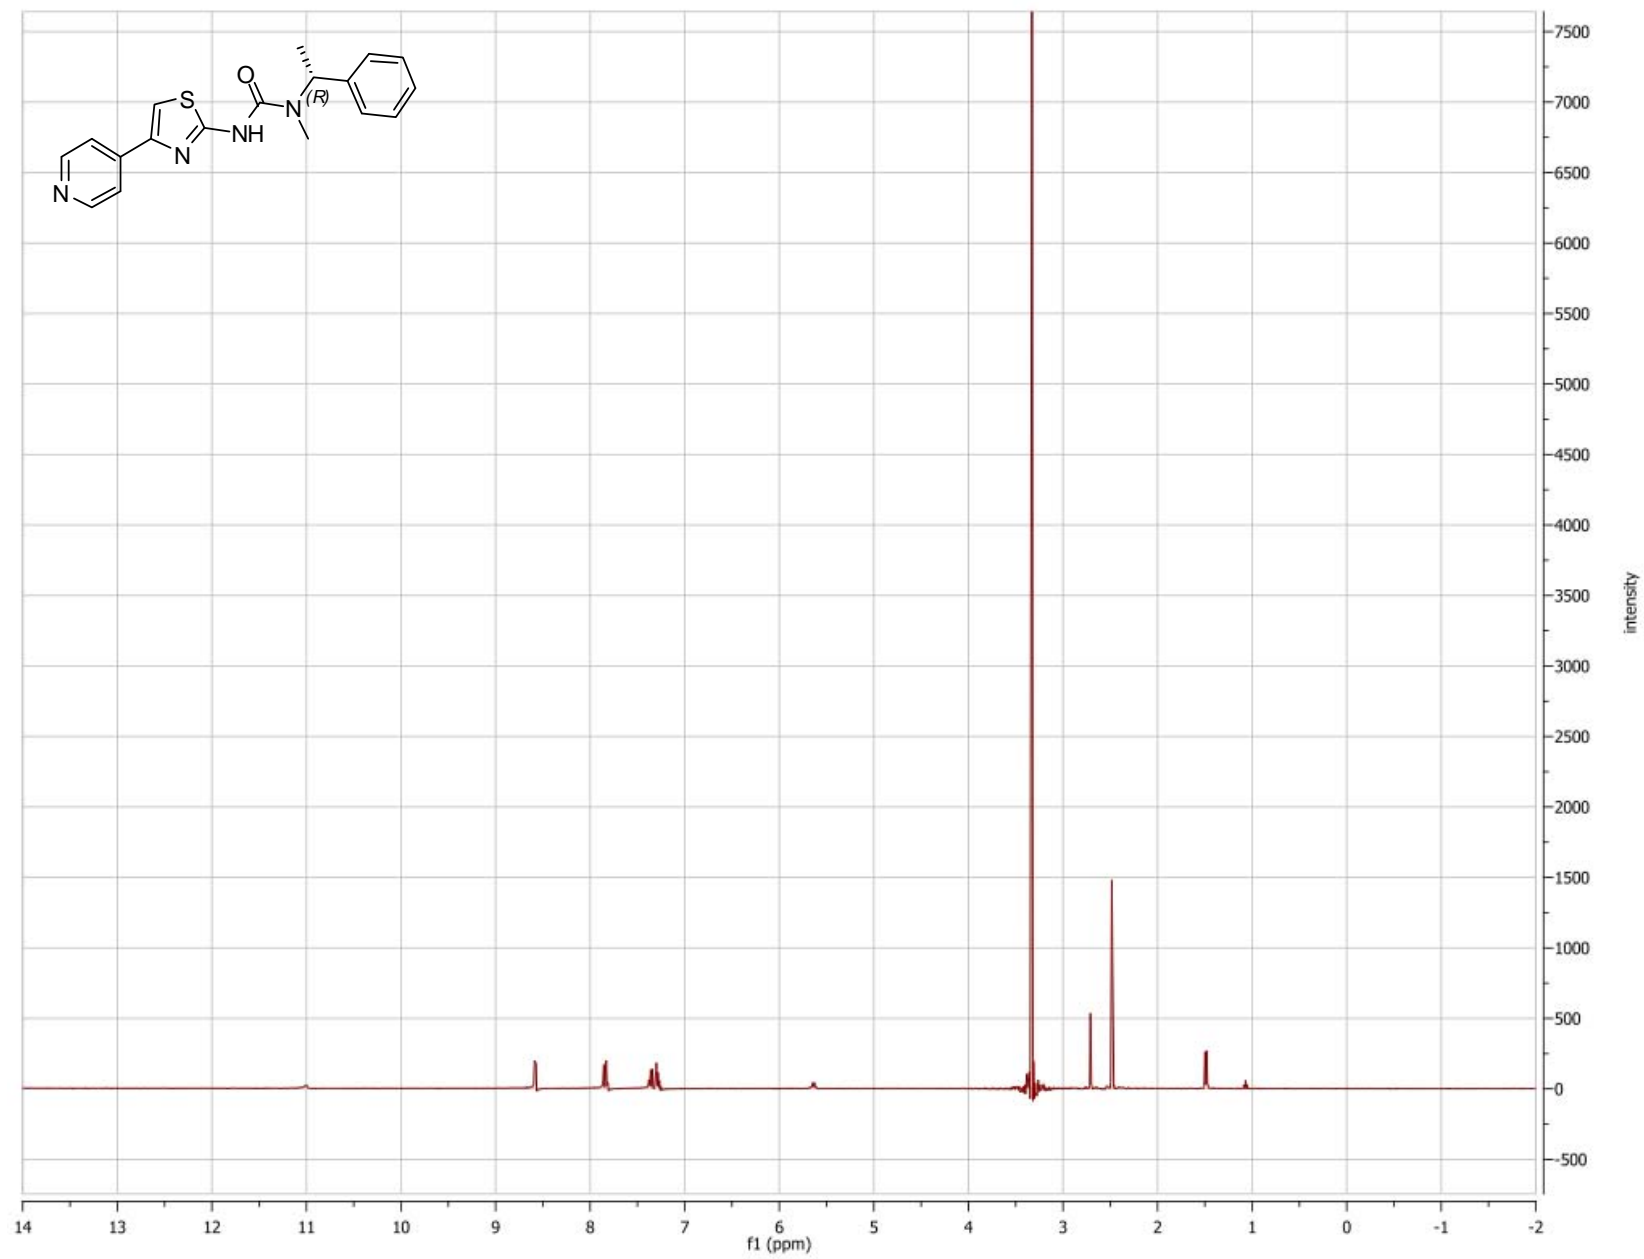

Expansion of the aromatic region of (*R*)-14i

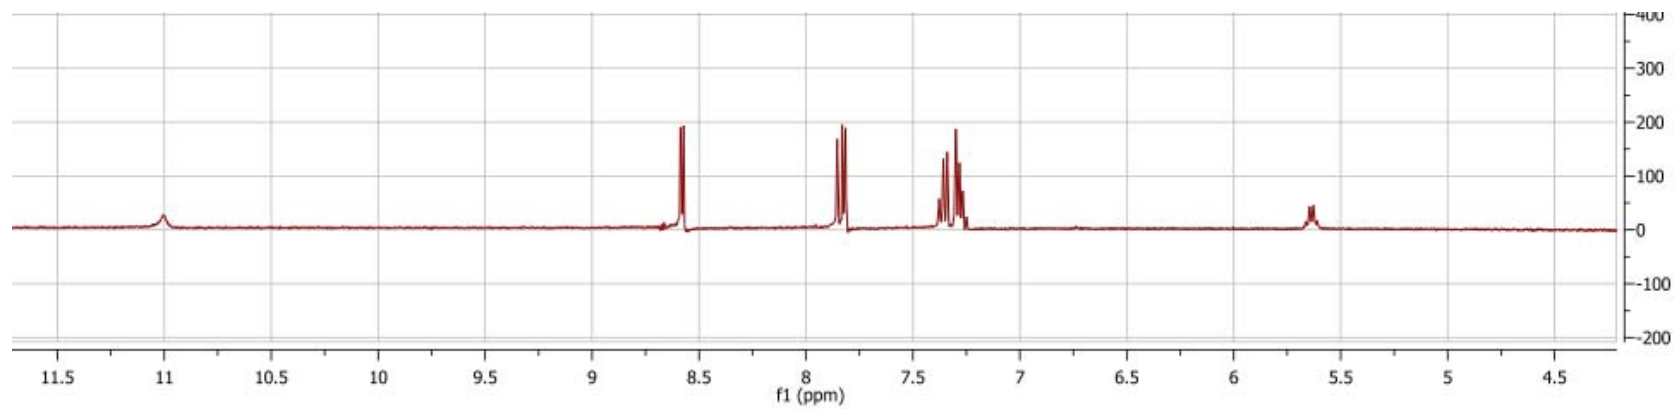

$^1\text{H}$  NMR (DMSO- $d_6$ ) spectrum of (*S*)-**14i**.

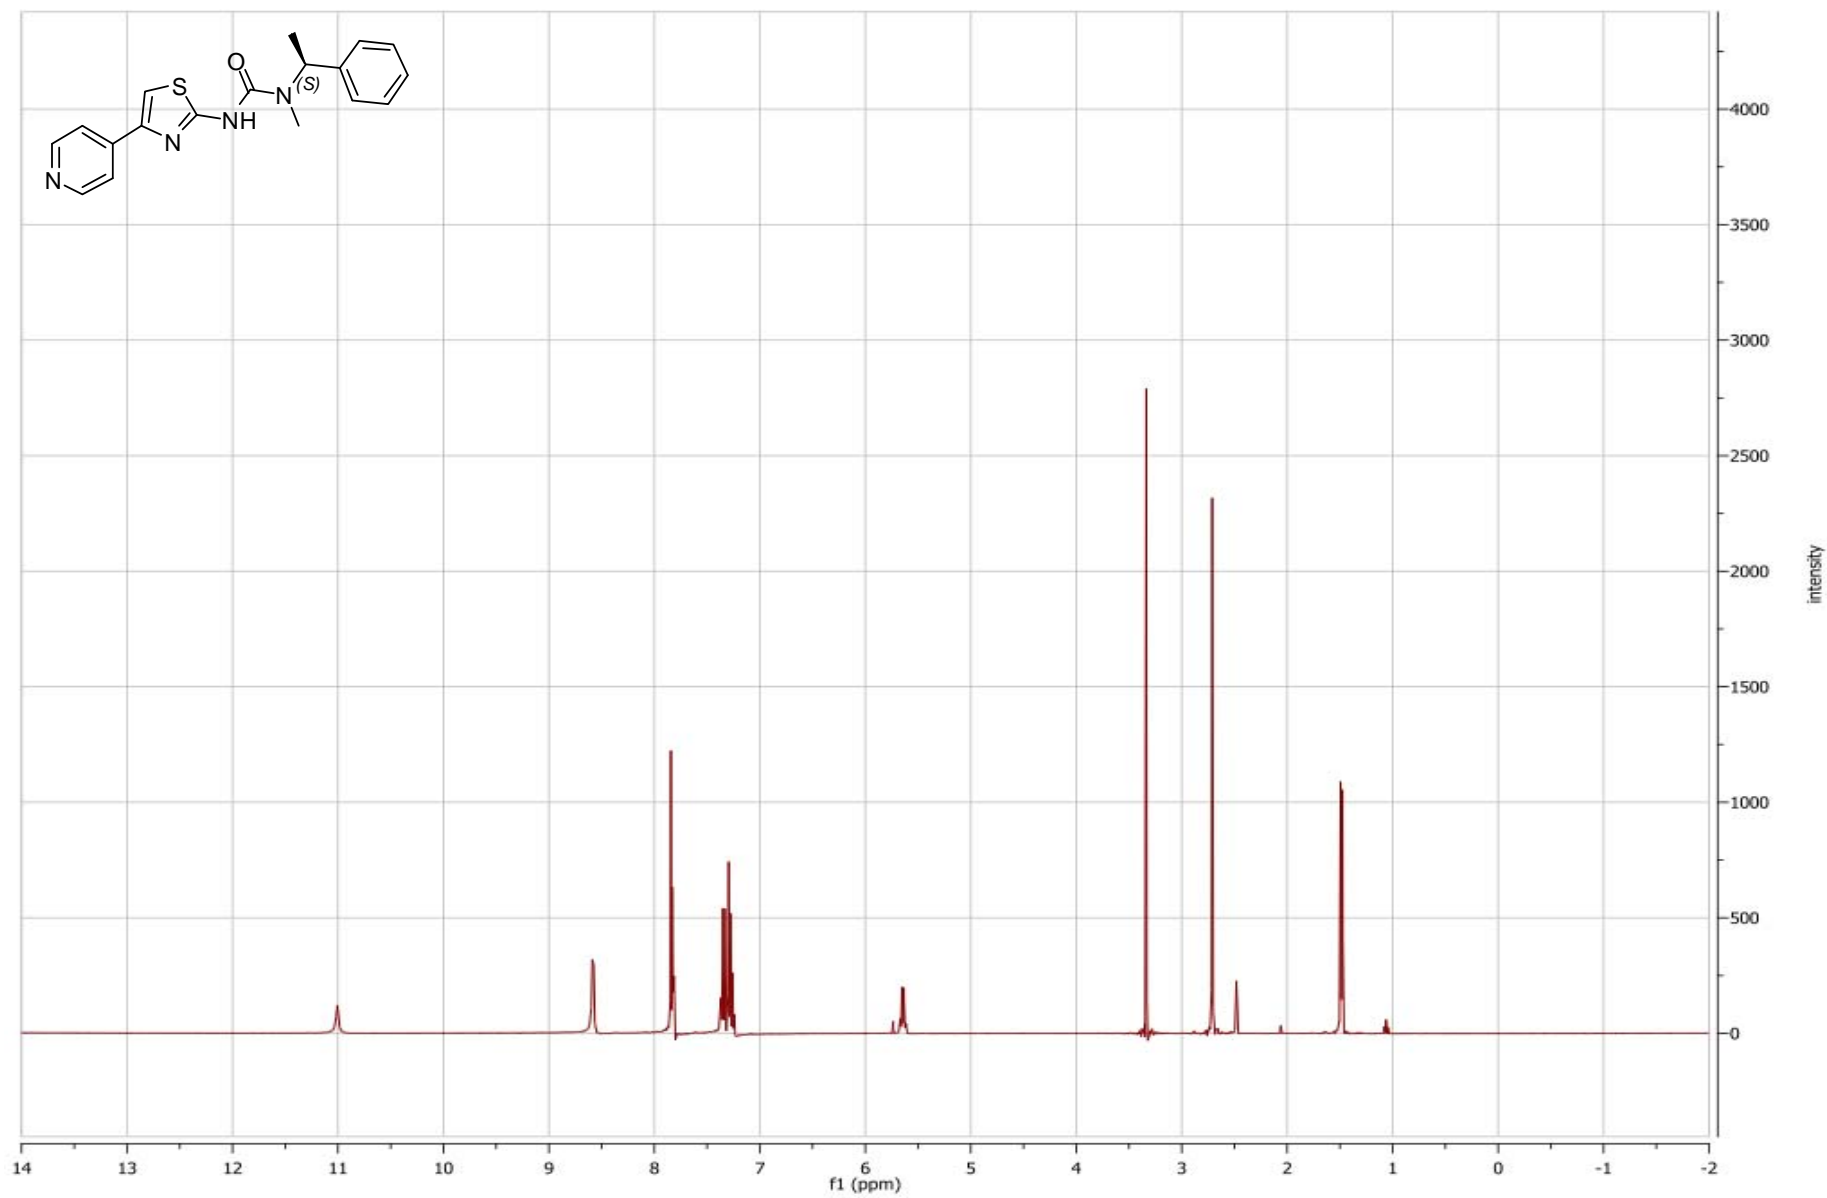

Expansion of the aromatic region of (S)-**14i**.

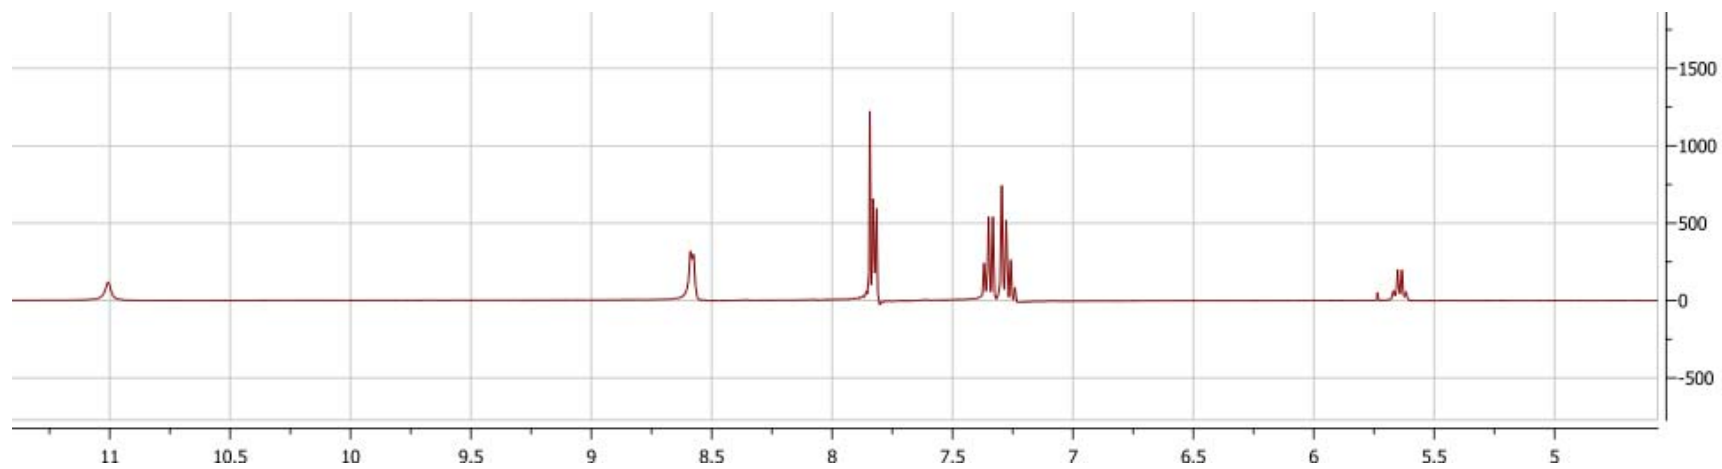

$^1\text{H}$  NMR (DMSO- $d_6$ ) spectrum of **5b-Mes**

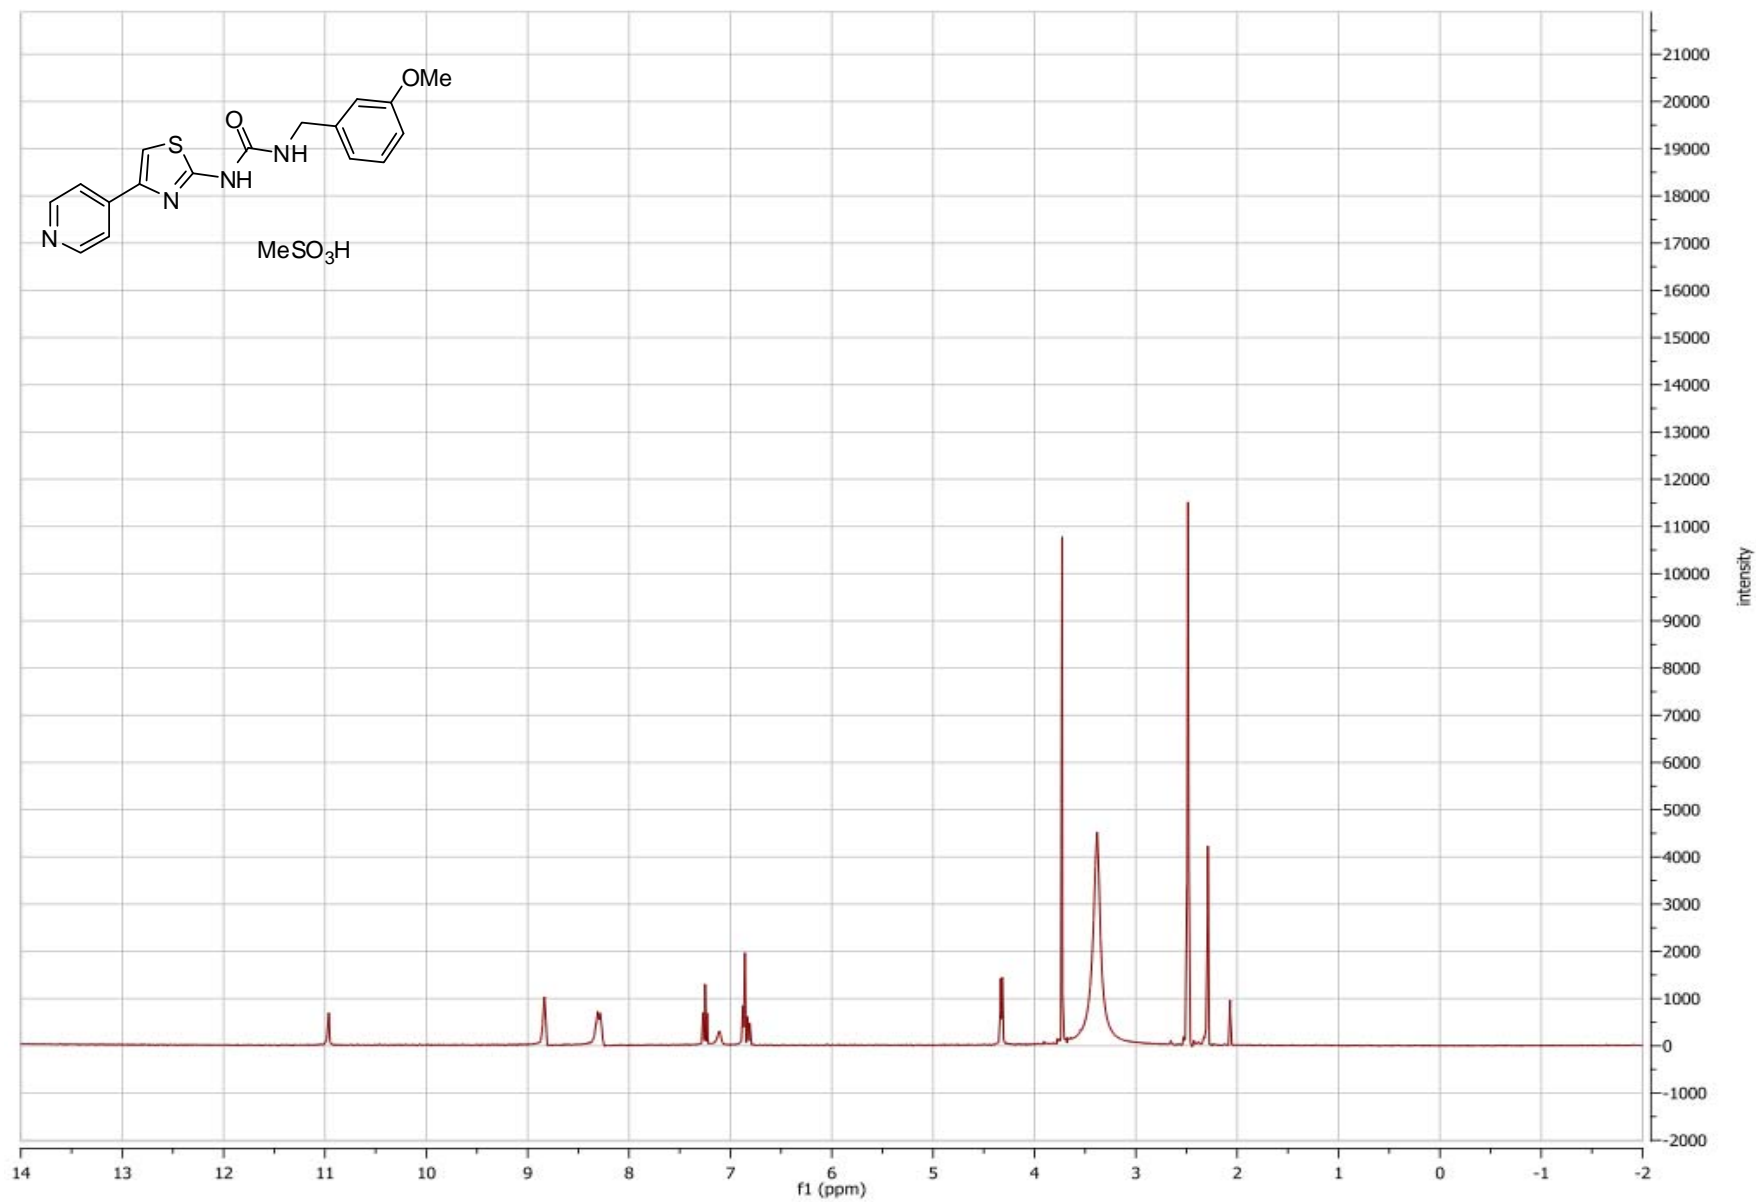

Expansion of the aromatic region of **5b-Mes**

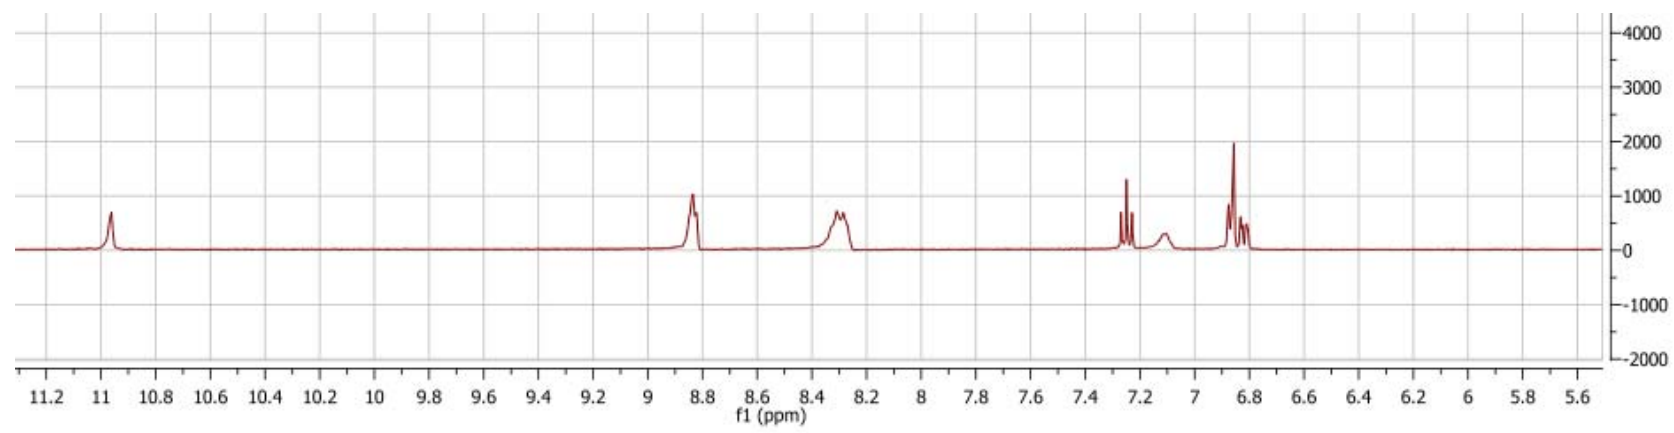

$^1\text{H}$  NMR (DMSO- $d_6$ ) spectrum of **5g-Mes**

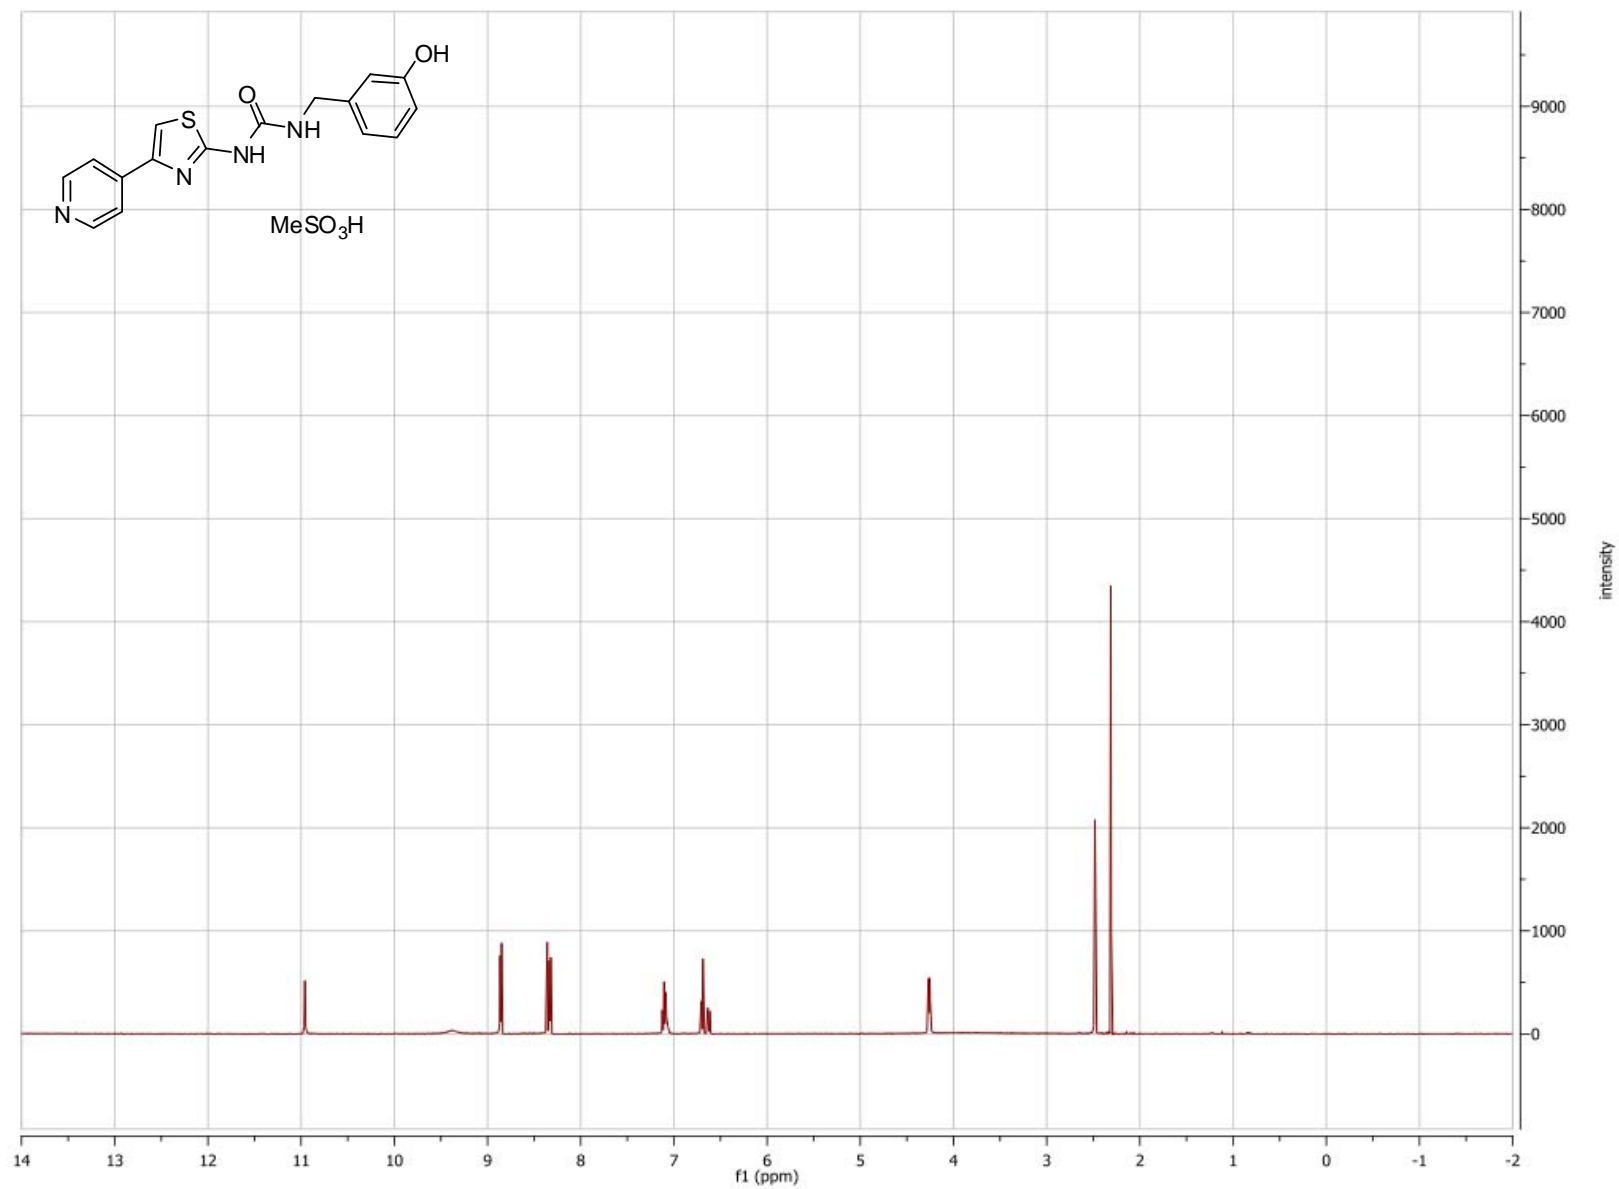



Expansion of the aromatic region of **5g-Mes**

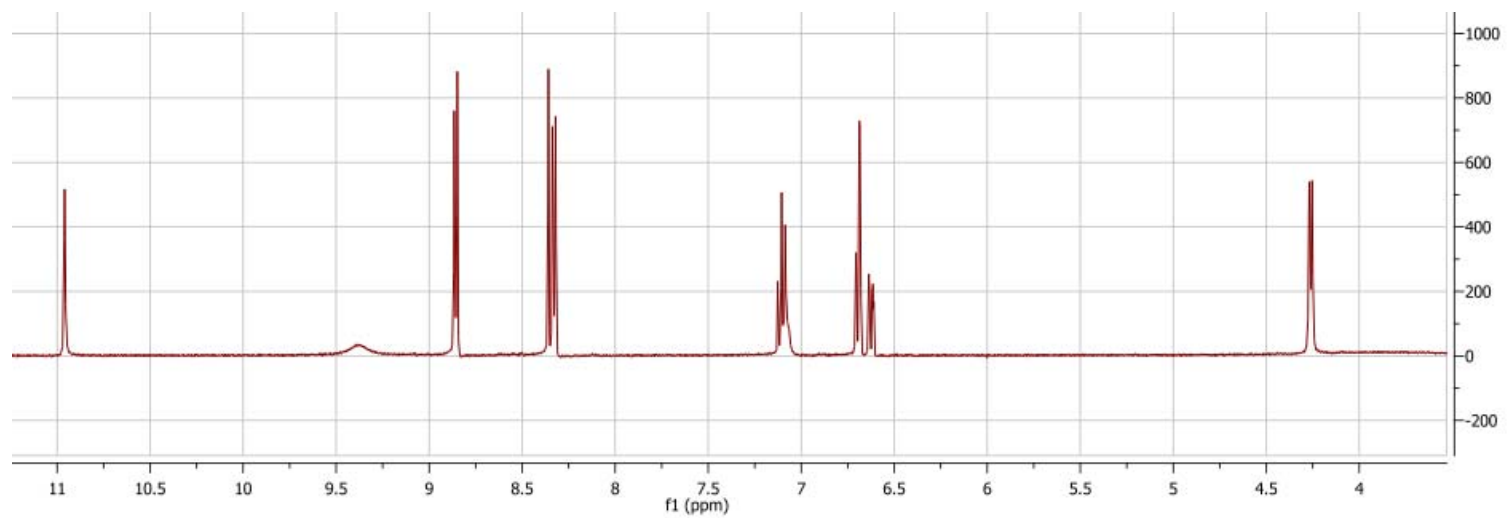



$^1\text{H}$  NMR (DMSO- $d_6$ ) spectrum of **5d-Mes**

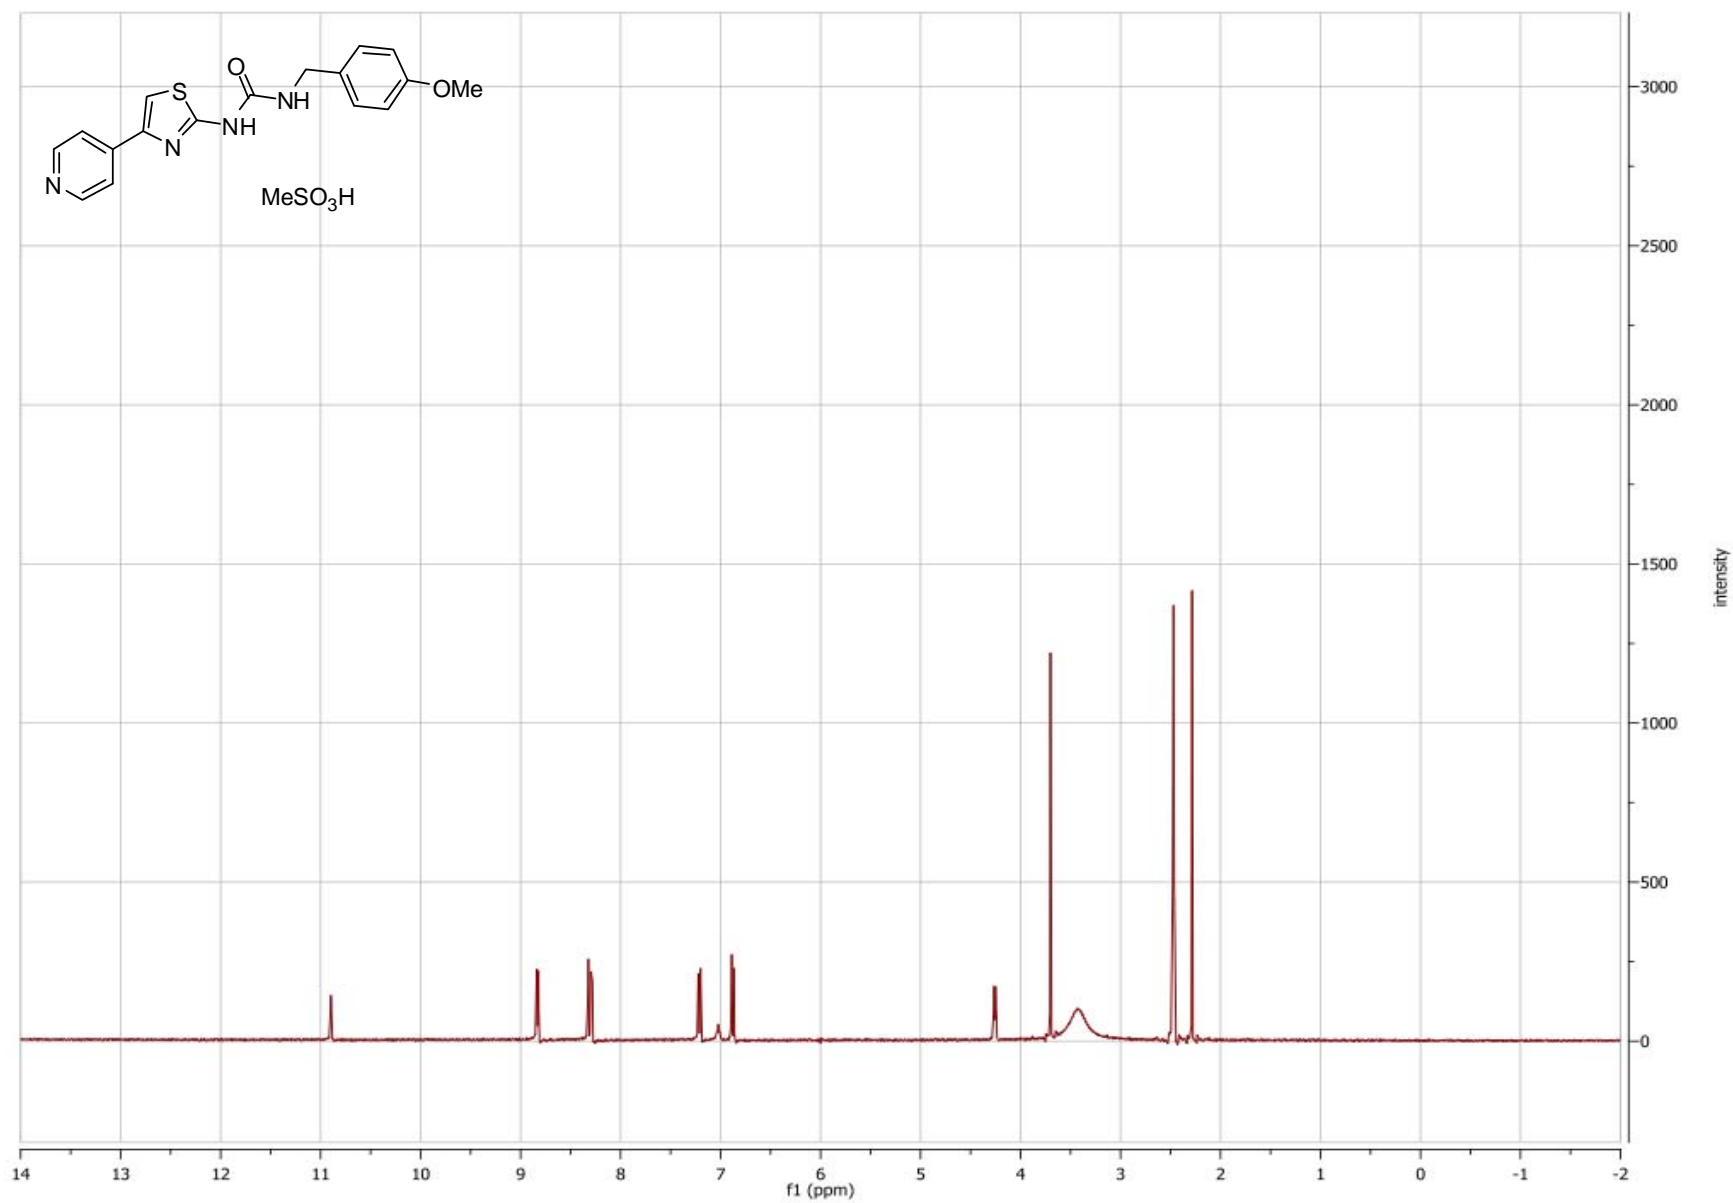

Expansion of the aromatic region of **5d-Mes**

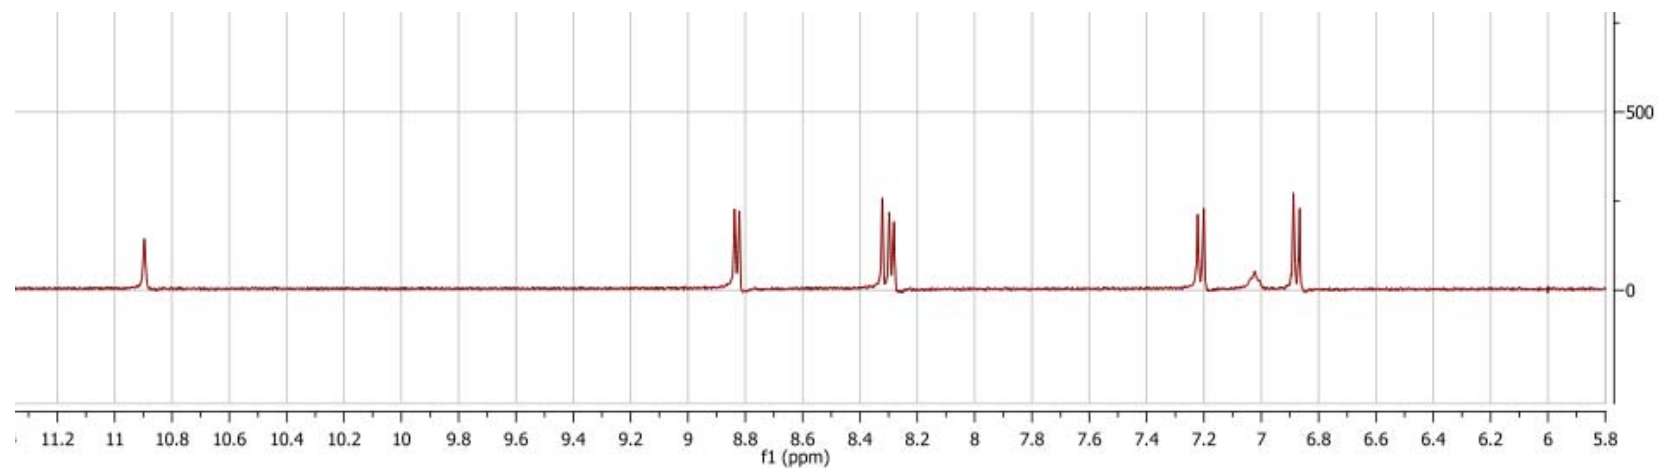

$^1\text{H}$  NMR (DMSO- $d_6$ ) spectrum of **5b-HCl**

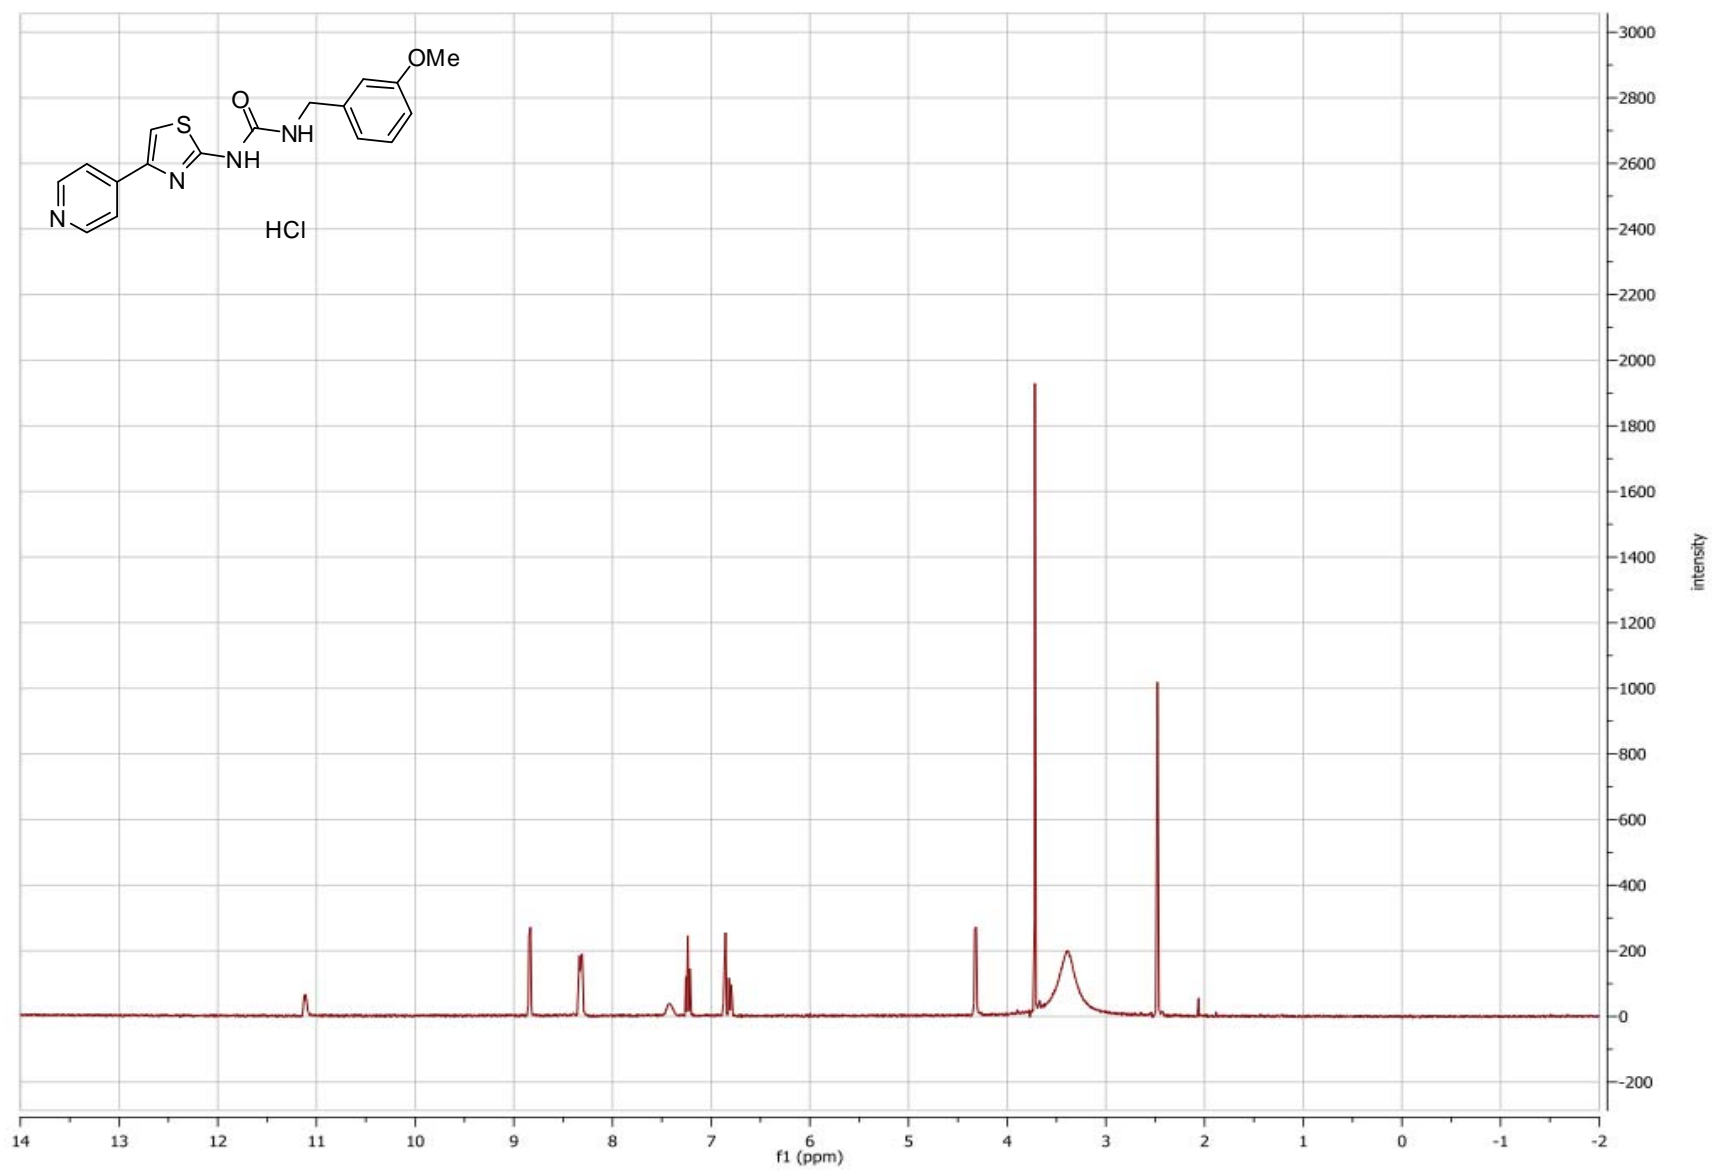

Expansion of the aromatic region of **5b-HCl**

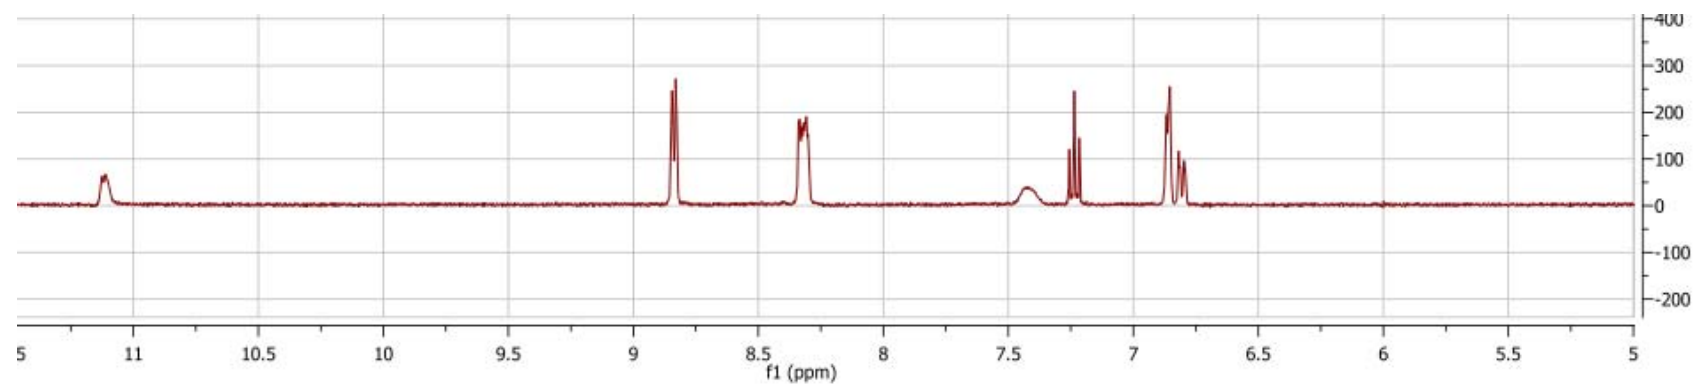

$^1\text{H}$  NMR (DMSO- $d_6$ ) spectrum of **5g-HCl**

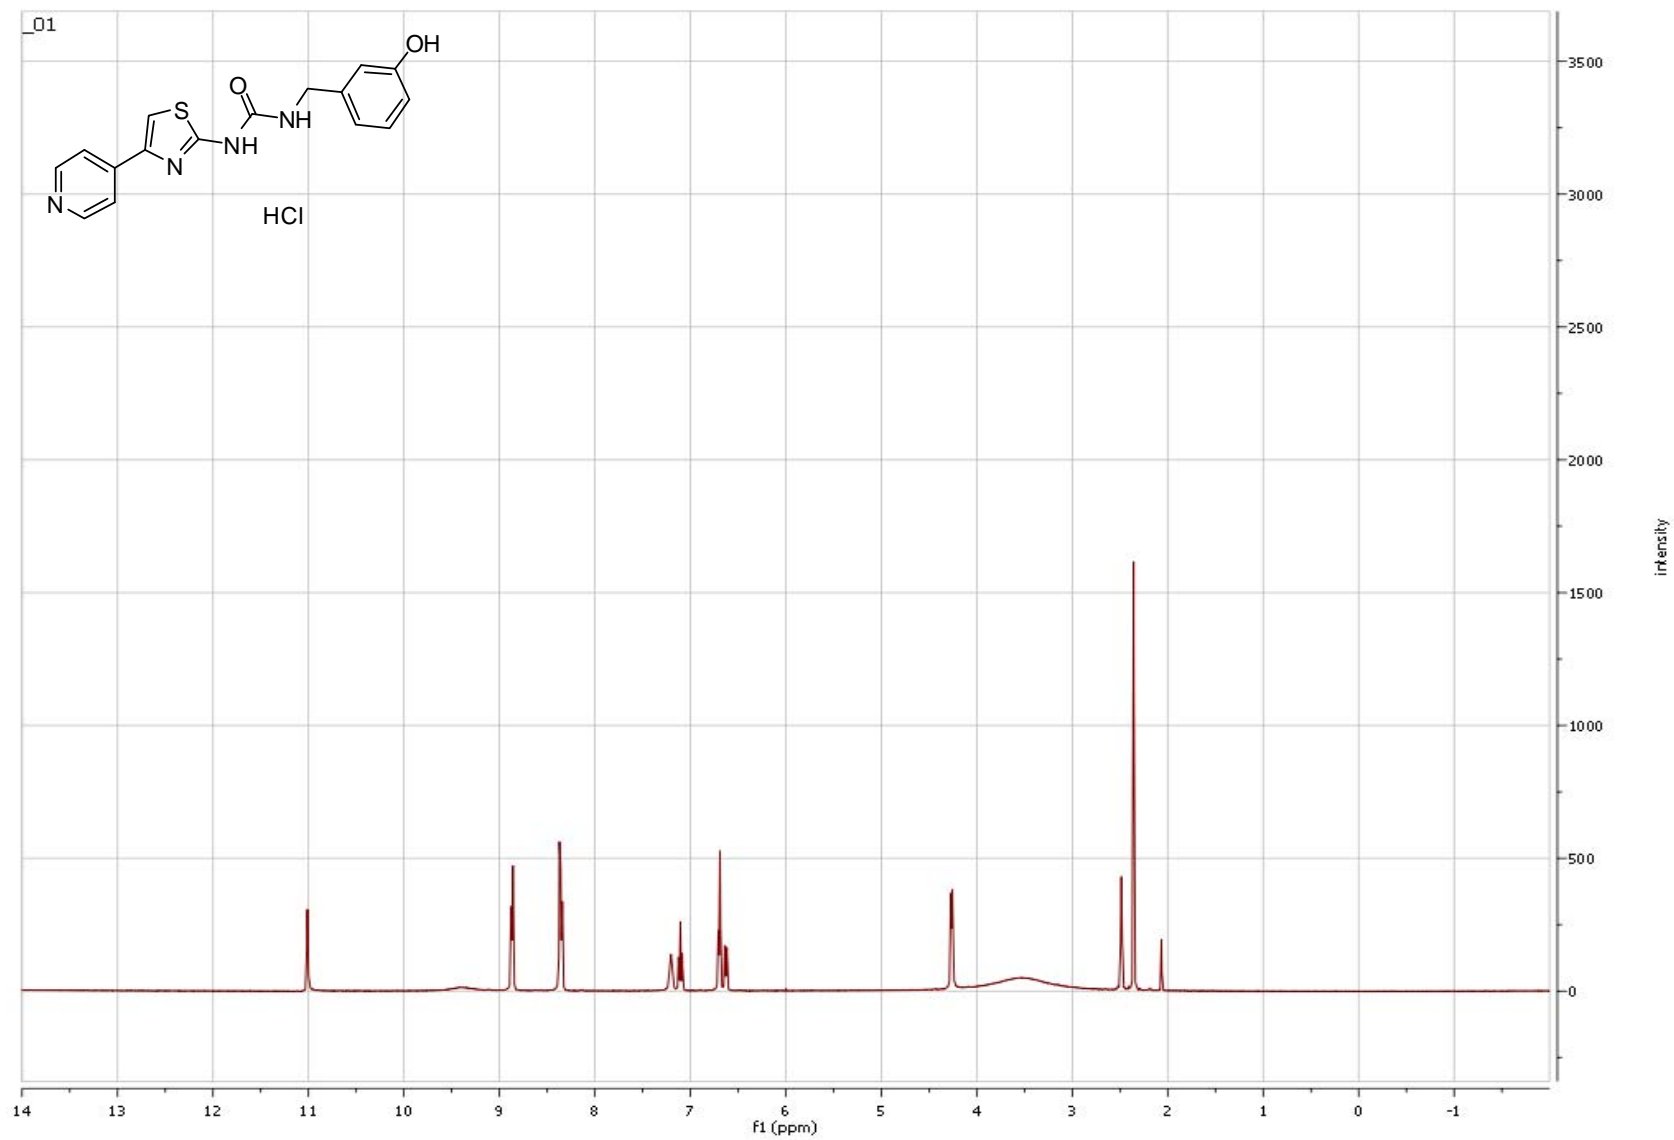

Expansion of the aromatic region of **5g-HCl**

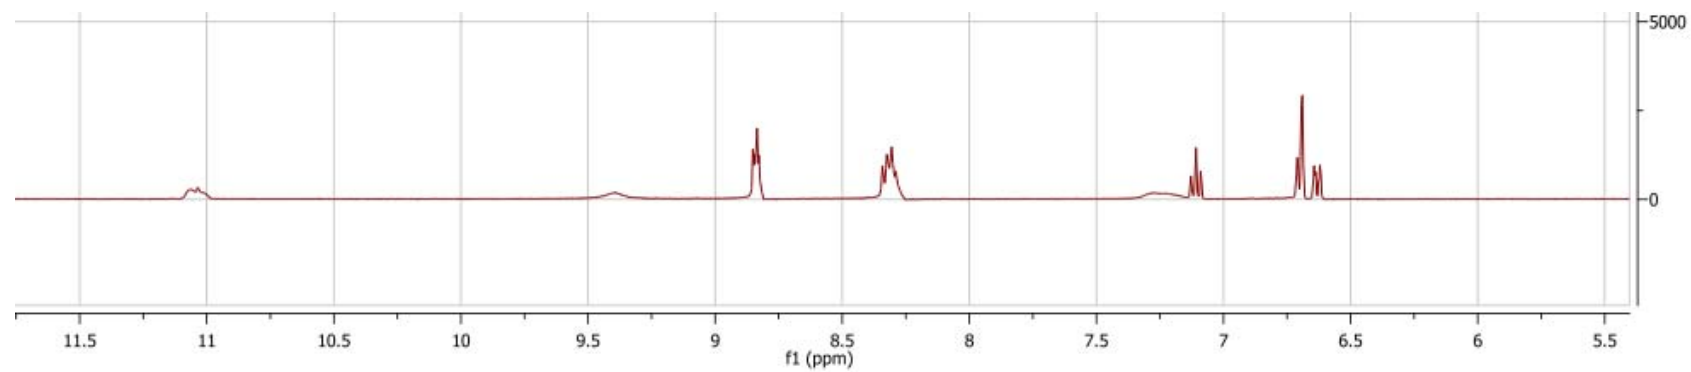



$^1\text{H}$  NMR (DMSO- $d_6$ ) spectrum of **5d-HCl**

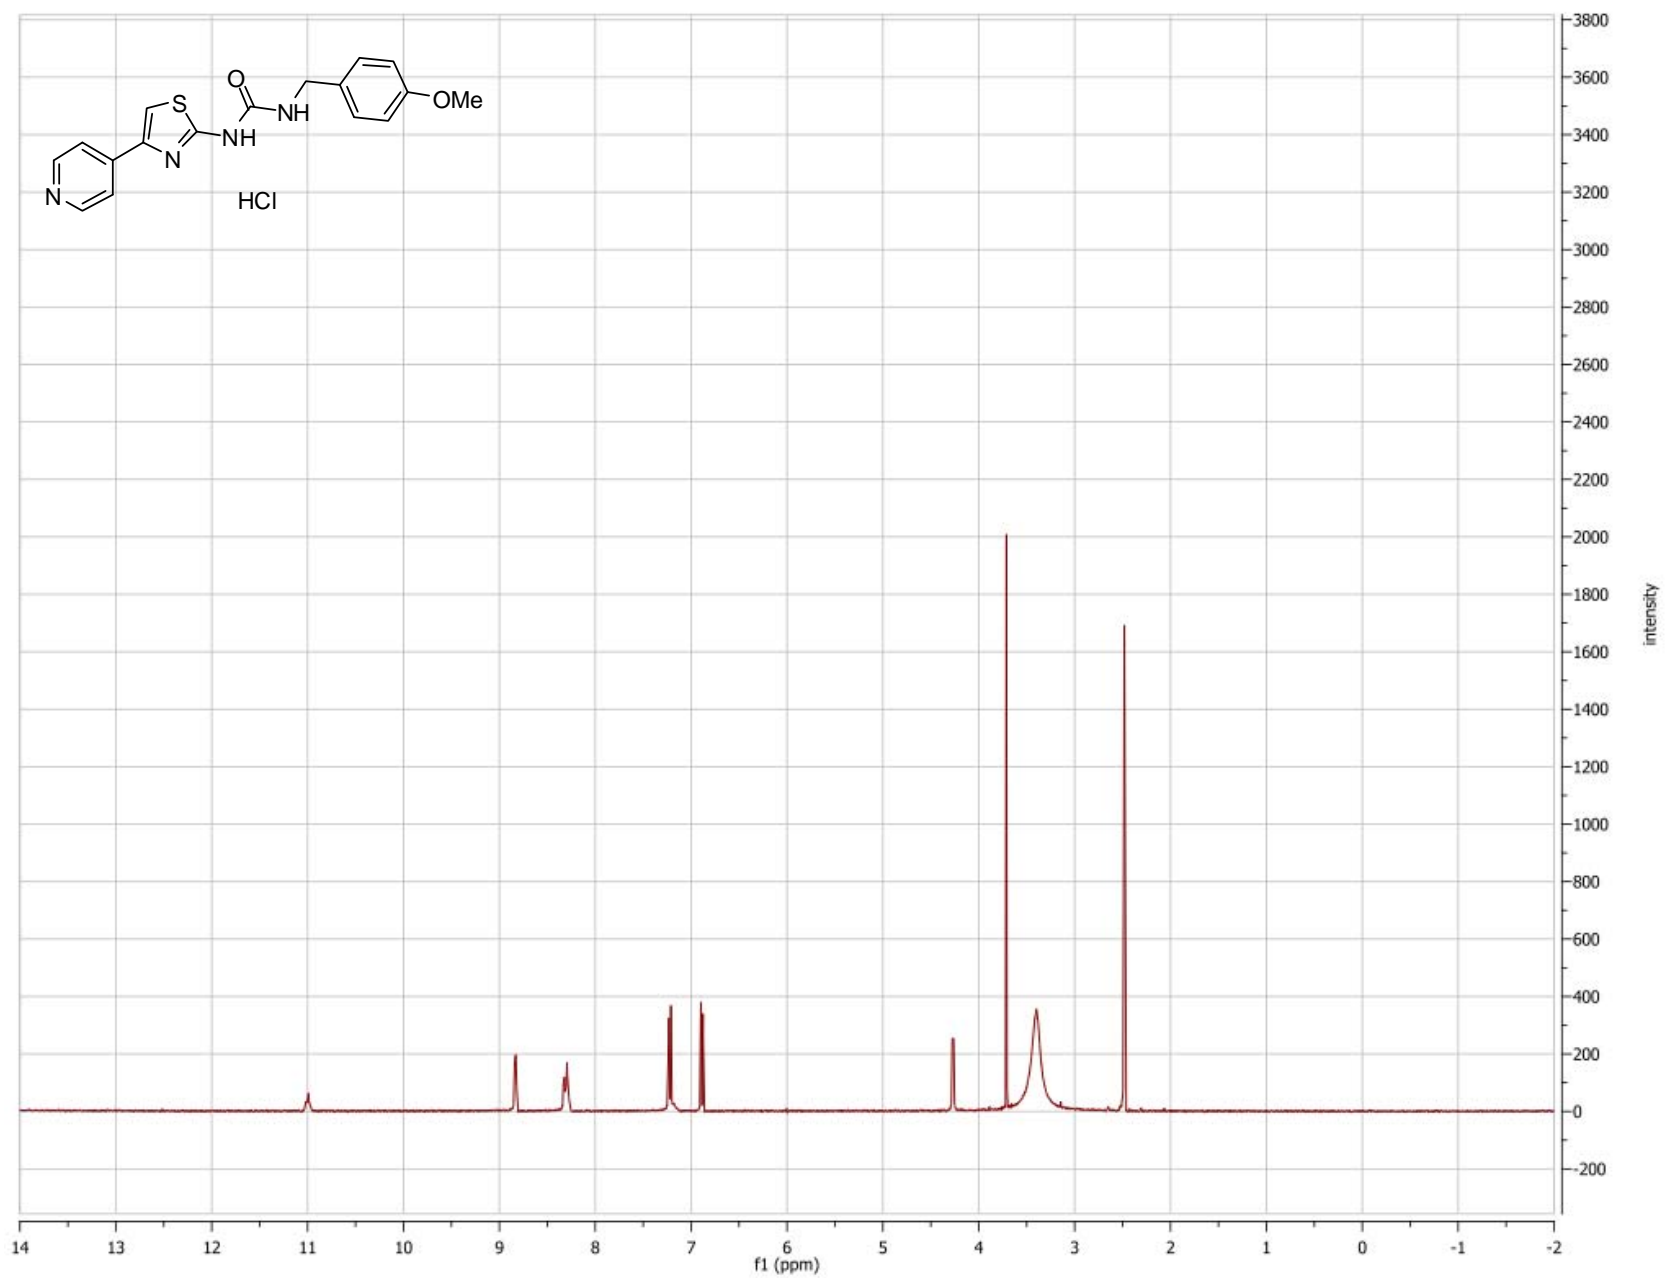

Expansion of the aromatic region of **5d-HCl**

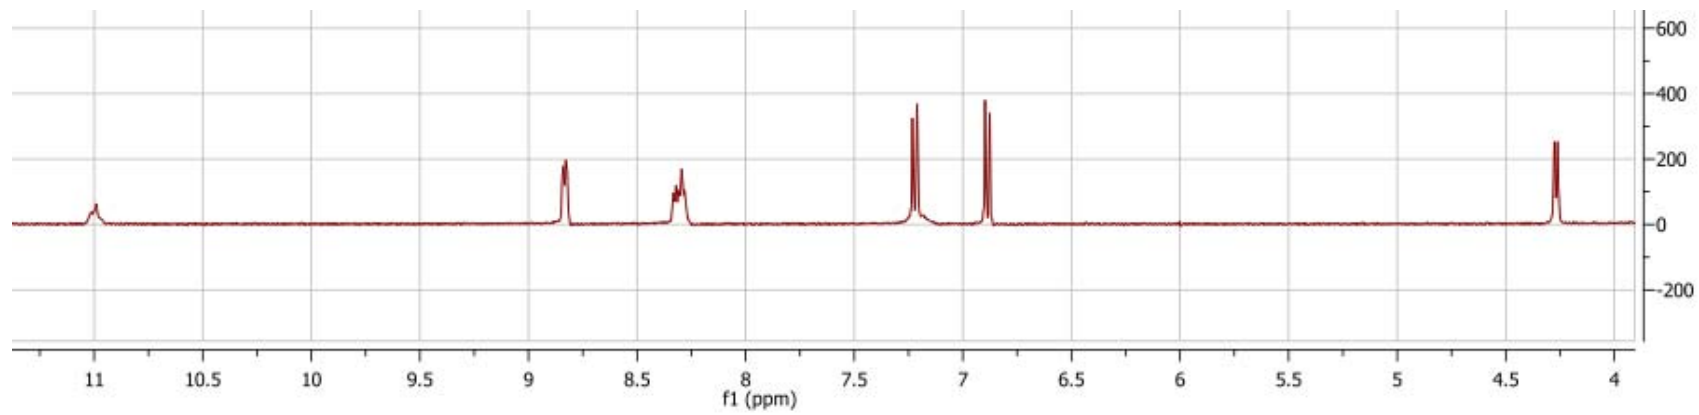

Supplement: NIHMS420473-supplement-esi2.pdf [file NIHMS420473-supplement-esi2.pdf]
