# Supplementary material
Source: PubMed Central journal article supplement (PMC3531244)
Supplement: NIHMS420473-supplement-esi1.pdf [file NIHMS420473-supplement-esi1.pdf]

## Supplementary Material:

### Pyridylthiazole-Based Ureas as Inhibitors of Rho Associated Protein Kinases (ROCK1 and 2)

Roberta Pireddu,<sup>1</sup> Kara Forinash,<sup>1</sup> Nan N. Sun,<sup>2</sup> Mathew P. Martin,<sup>1</sup> Shen-Shu Sung,<sup>2</sup> Brian Alexander,<sup>1</sup>  
Jin-Yi Zhu,<sup>1</sup> Wayne C. Guida,<sup>1,2,4</sup> Ernst Schönbrunn,<sup>1,3</sup> Saïd M. Sebt<sup>1,3,5</sup> and Nicholas J. Lawrence<sup>1,3\*</sup>

*From* The <sup>1</sup>Department of Drug Discovery, and <sup>2</sup>Chemical Biology Core Facility, Moffitt Cancer Center;  
Departments of <sup>3</sup>Oncological Sciences, <sup>4</sup>Chemistry and <sup>5</sup>Molecular Medicine, University of South  
Florida, Tampa, Florida, 33612

# HPLC trace 1 of 5a

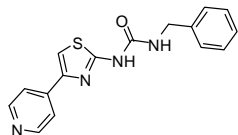

## Area % Report

Data File: C:\EZChrom Elite\Data\Roberta\RPM1199MeOH40 0.1%TFA H2O60 20min 1ml.met  
 1-30-2009 1-12-44 PM.dat  
 Method: C:\EZChrom Elite-Methods\Roberta\MeOH40 0.1%TFA H2O60 20min 1ml.met  
 Acquired: 1/30/2009 1:15:03 PM  
 Printed: 1/30/2009 1:45:55 PM  
 Vial: 20

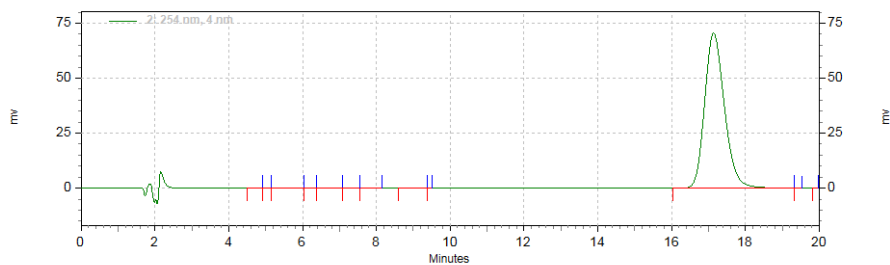

### 2: 254 nm, 4 nm Results

| Pk # | Retention Time | Area    | Area Percent |
|------|----------------|---------|--------------|
| 1    | 4.613          | 1690    | 0.063        |
| 2    | 5.027          | 495     | 0.019        |
| 3    | 5.893          | 2542    | 0.096        |
| 4    | 6.120          | 1068    | 0.040        |
| 5    | 6.960          | 2575    | 0.097        |
| 6    | 7.387          | 1020    | 0.038        |
| 7    | 7.853          | 2199    | 0.083        |
| 8    | 8.907          | 5688    | 0.214        |
| 9    | 9.427          | 215     | 0.008        |
| 10   | 17.133         | 2643509 | 99.316       |
| 11   | 19.400         | 482     | 0.018        |
| 12   | 19.853         | 242     | 0.009        |

|        |         |         |
|--------|---------|---------|
| Totals | 2661725 | 100.000 |
|--------|---------|---------|

-----  
 ---< General Method Parameters >-----  
 -----

### Jasco Pumps

Model: PU-2086

**Area % Report**

Data File: C:\EZChrom Elite\Data\Roberta\RPM1199 CH3CN30 H2O70 0.1TFA 1mL 20min.met  
 1-28-2009 1-59-50 AM  
 Method: C:\EZChrom Elite-Methods\Xin\CH3CN30 H2O70 0.1TFA 1mL 20min.met  
 Acquired: 1/28/2009 2:00:31 AM  
 Printed: 1/28/2009 10:23:45 AM  
 Vial: 32

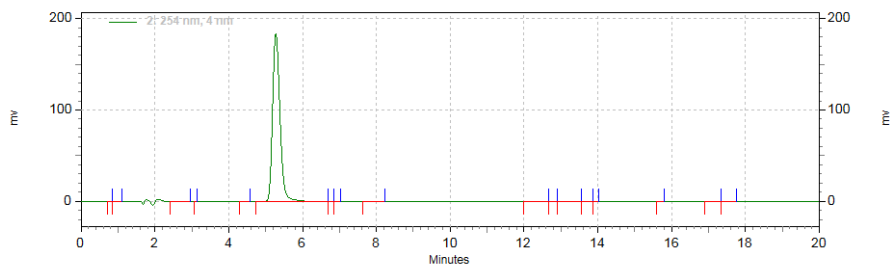

2: 254 nm, 4 nm Results

| Pk # | Retention Time | Area    | Area Percent |
|------|----------------|---------|--------------|
| 1    | 0.773          | 349     | 0.014        |
| 2    | 0.933          | 535     | 0.021        |
| 3    | 2.680          | 3809    | 0.148        |
| 4    | 3.133          | 99      | 0.004        |
| 5    | 4.387          | 1028    | 0.040        |
| 6    | 5.280          | 2560605 | 99.307       |
| 7    | 6.760          | 581     | 0.023        |
| 8    | 6.907          | 277     | 0.011        |
| 9    | 7.813          | 1790    | 0.069        |
| 10   | 12.400         | 4320    | 0.168        |
| 11   | 12.707         | 337     | 0.013        |
| 12   | 13.413         | 1918    | 0.074        |
| 13   | 13.560         | 924     | 0.036        |
| 14   | 13.920         | 249     | 0.010        |
| 15   | 15.627         | 298     | 0.012        |
| 16   | 17.240         | 883     | 0.034        |
| 17   | 17.667         | 483     | 0.019        |

|        |         |         |
|--------|---------|---------|
| Totals | 2578485 | 100.000 |
|--------|---------|---------|

-----  
 ---< General Method Parameters >-----

HPLC trace 1 of 5e

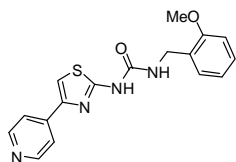

Area % Report

Data File: C:\EZChrom Elite\Data\Roberta\RPM1238MeOH50 0.1%TFA H2O50 20min 1ml.met 2-2-2009 7-00-30 PM  
 Method: C:\EZChrom Elite-Methods\Roberta\MeOH50 0.1%TFA H2O50 20min 1ml.met  
 Acquired: 2/2/2009 7:01:12 PM  
 Printed: 2/3/2009 9:16:33 AM  
 Vial: 11

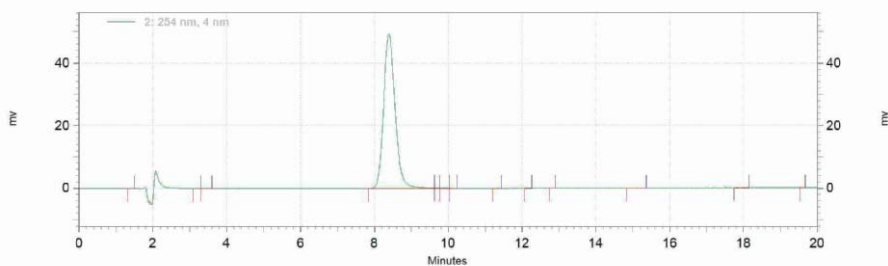

2: 254 nm, 4 nm Results

| PK # | Retention Time | Area    | Area Percent |
|------|----------------|---------|--------------|
| 1    | 1.360          | 191     | 0.018        |
| 2    | 3.133          | 209     | 0.020        |
| 3    | 3.440          | 435     | 0.041        |
| 4    | 8.400          | 1064379 | 99.436       |
| 5    | 9.640          | 954     | 0.089        |
| 6    | 9.827          | 1218    | 0.114        |
| 7    | 10.093         | 368     | 0.034        |
| 8    | 11.347         | 415     | 0.039        |
| 9    | 12.160         | 279     | 0.026        |
| 10   | 12.827         | 215     | 0.020        |
| 11   | 15.200         | 929     | 0.087        |
| 12   | 17.933         | 671     | 0.063        |
| 13   | 19.600         | 154     | 0.014        |

|        |  |         |         |
|--------|--|---------|---------|
| Totals |  | 1070417 | 100.000 |
|--------|--|---------|---------|

-----  
 ---< General Method Parameters >-----  
 -----

=====  
 Jasco Pumps  
 =====



Area % Report

Data File: C:\EZChrom Elite\Data\Roberta\RPM1238 CH3CN30 H2O70 0.1TFA 1mL 20min.met  
 1-28-2009 3:22:59 AM  
 Method: C:\EZChrom Elite\Methods\Xin\CH3CN30 H2O70 0.1TFA 1mL 20min.met  
 Acquired: 1/28/2009 3:23:40 AM  
 Printed: 1/28/2009 10:29:31 AM  
 Vial: 34

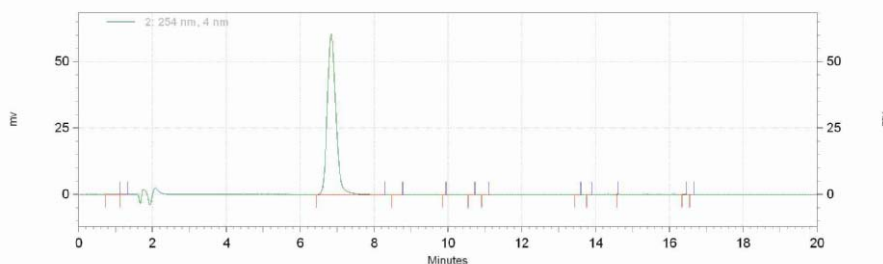

2: 254 nm, 4 nm Results

| Pk # | Retention Time | Area   | Area Percent |
|------|----------------|--------|--------------|
| 1    | 0.960          | 780    | 0.080        |
| 2    | 1.160          | 554    | 0.057        |
| 3    | 6.840          | 977008 | 99.698       |
| 4    | 8.493          | 299    | 0.031        |
| 5    | 9.920          | 115    | 0.012        |
| 6    | 10.560         | 279    | 0.028        |
| 7    | 11.027         | 246    | 0.025        |
| 8    | 13.520         | 199    | 0.020        |
| 9    | 13.813         | 164    | 0.017        |
| 10   | 14.587         | 24     | 0.002        |
| 11   | 16.400         | 135    | 0.014        |
| 12   | 16.560         | 166    | 0.017        |

|        |  |        |         |
|--------|--|--------|---------|
| Totals |  | 979969 | 100.000 |
|--------|--|--------|---------|

-----  
 --< General Method Parameters >-----  
 -----

Jasco Pumps

=====

Model: PU-2086

HPLC trace1 of **5r**

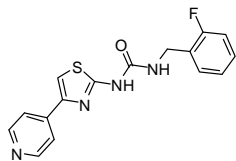

Area % Report

Data File: C:\EZChrom Elite\Data\Roberta\RPM1237 CH3CN30 H2O70 0.1TFA 1mL 20min.met  
 1-28-2009 2:41-25 AM  
 Method: C:\EZChrom Elite-Methods\Xim\CH3CN30 H2O70 0.1TFA 1mL 20min.met  
 Acquired: 1/28/2009 2:42:05 AM  
 Printed: 1/28/2009 10:27:00 AM  
 Vial: 33

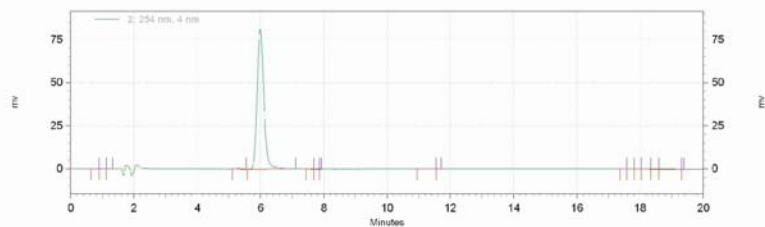

2: 254 nm, 4 nm Results

| Pk # | Retention Time | Area    | Area Percent |
|------|----------------|---------|--------------|
| 1    | 0.760          | 420     | 0.035        |
| 2    | 0.933          | 443     | 0.037        |
| 3    | 1.187          | 525     | 0.043        |
| 4    | 5.293          | 4086    | 0.337        |
| 5    | 5.987          | 1200777 | 99.028       |
| 6    | 7.520          | 326     | 0.027        |
| 7    | 7.787          | 167     | 0.014        |
| 8    | 7.907          | 110     | 0.009        |
| 9    | 11.253         | 1748    | 0.144        |
| 10   | 11.573         | 224     | 0.018        |
| 11   | 17.387         | 256     | 0.021        |
| 12   | 17.627         | 317     | 0.026        |
| 13   | 17.880         | 302     | 0.025        |
| 14   | 18.080         | 412     | 0.034        |
| 15   | 18.347         | 483     | 0.040        |
| 16   | 18.933         | 1871    | 0.154        |
| 17   | 19.347         | 95      | 0.008        |

|        |  |         |         |
|--------|--|---------|---------|
| Totals |  | 1212562 | 100.000 |
|--------|--|---------|---------|

-----  
 ---< General Method Parameters >-----

## Area % Report

Data File: C:\EZChrom Elite\Data\Roberta\RPM1237MeOH50 0.1%TFA H2O50 20min 1ml.met 2-2-2009  
9-46-52 PM  
Method: C:\EZChrom Elite\Methods\Roberta\MeOH50 0.1%TFA H2O50 20min 1ml.met  
Acquired: 2/2/2009 9:47:33 PM  
Printed: 2/3/2009 9:23:46 AM  
Vial: 15

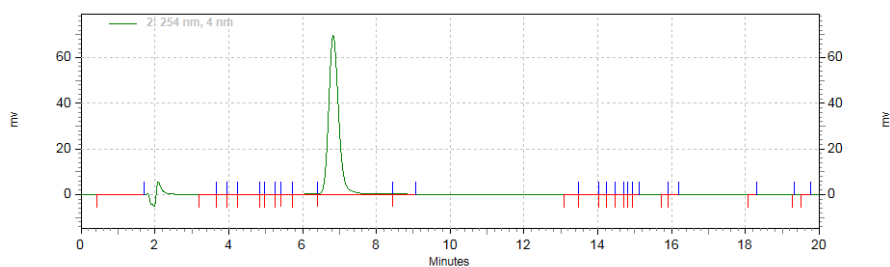

## 2: 254 nm, 4 nm Results

| PK # | Retention Time | Area    | Area Percent |
|------|----------------|---------|--------------|
| 1    | 1.640          | 6737    | 0.506        |
| 2    | 3.227          | 740     | 0.056        |
| 3    | 3.707          | 821     | 0.062        |
| 4    | 4.000          | 712     | 0.053        |
| 5    | 4.747          | 1969    | 0.148        |
| 6    | 4.853          | 621     | 0.047        |
| 7    | 5.147          | 1288    | 0.097        |
| 8    | 5.320          | 646     | 0.049        |
| 9    | 5.520          | 1325    | 0.100        |
| 10   | 6.253          | 6465    | 0.486        |
| 11   | 6.827          | 1301656 | 97.761       |
| 12   | 8.707          | 2354    | 0.177        |
| 13   | 13.173         | 483     | 0.036        |
| 14   | 13.920         | 1622    | 0.122        |
| 15   | 14.040         | 853     | 0.064        |
| 16   | 14.267         | 700     | 0.053        |
| 17   | 14.547         | 367     | 0.028        |
| 18   | 14.747         | 168     | 0.013        |
| 19   | 14.880         | 182     | 0.014        |
| 20   | 15.053         | 231     | 0.017        |
| 21   | 15.787         | 213     | 0.016        |
| 22   | 16.093         | 597     | 0.045        |
| 23   | 18.147         | 245     | 0.018        |

# HPLC trace 1 of 5u

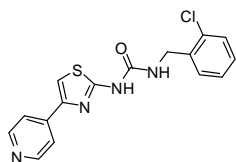

## Area % Report

Data File: C:\EZChrom Elite\Data\Roberta\RPM1239MeOH50 0.1%TFA H2O50 20min 1ml.met 2-3-2009 10-21-27 AM.dat  
 Method: C:\EZChrom Elite\Methods\Roberta\MeOH50 0.1%TFA H2O50 20min 1ml.met  
 Acquired: 2/3/2009 10:23:44 AM  
 Printed: 2/3/2009 10:55:43 AM  
 Vial: 26

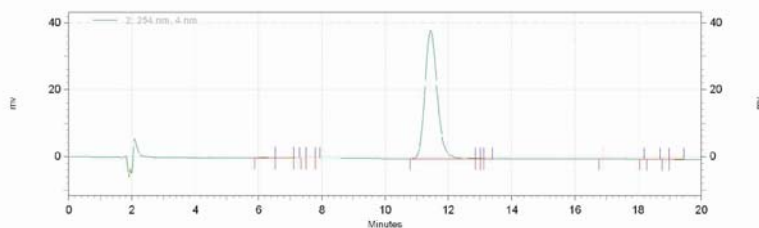

### 2: 254 nm, 4 nm Results

| Pk # | Retention Time | Area    | Area Percent |
|------|----------------|---------|--------------|
| 1    | 6.133          | 3268    | 0.312        |
| 2    | 6.707          | 1976    | 0.189        |
| 3    | 7.133          | 327     | 0.031        |
| 4    | 7.360          | 231     | 0.022        |
| 5    | 7.560          | 458     | 0.044        |
| 6    | 7.827          | 186     | 0.018        |
| 7    | 11.440         | 1037509 | 99.047       |
| 8    | 12.880         | 694     | 0.066        |
| 9    | 13.027         | 295     | 0.028        |
| 10   | 13.147         | 318     | 0.030        |
| 11   | 16.800         | 226     | 0.022        |
| 12   | 18.133         | 178     | 0.017        |
| 13   | 18.507         | 713     | 0.068        |
| 14   | 18.827         | 362     | 0.035        |
| 15   | 19.013         | 747     | 0.071        |

|        |  |         |         |
|--------|--|---------|---------|
| Totals |  | 1047488 | 100.000 |
|--------|--|---------|---------|

-----  
 ---< General Method Parameters >-----  
 -----

Area % Report

Data File: C:\EZChrom Elite\Data\Roberta\RPM1239 CH3CN30 H2O70 0.1TFA 1mL 20min.met  
 1-28-2009 4-04-34 AM  
 Method: C:\EZChrom Elite\Methods\Xim\CH3CN30 H2O70 0.1TFA 1mL 20min.met  
 Acquired: 1/28/2009 4:05:16 AM  
 Printed: 1/28/2009 10:32:00 AM  
 Vial: 35

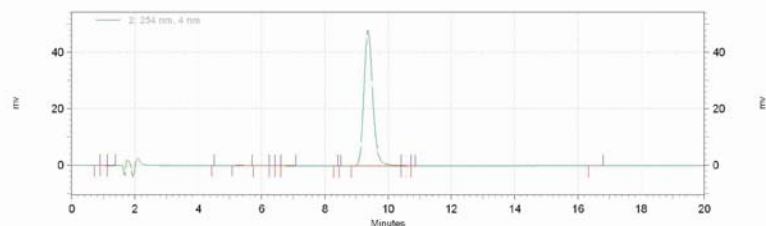

2: 254 nm, 4 nm Results

| Pk # | Retention Time | Area   | Area Percent |
|------|----------------|--------|--------------|
| 1    | 0.773          | 197    | 0.021        |
| 2    | 0.987          | 294    | 0.031        |
| 3    | 1.200          | 520    | 0.054        |
| 4    | 4.493          | 76     | 0.008        |
| 5    | 5.307          | 3450   | 0.361        |
| 6    | 5.960          | 1326   | 0.139        |
| 7    | 6.293          | 182    | 0.019        |
| 8    | 6.507          | 186    | 0.019        |
| 9    | 6.893          | 978    | 0.102        |
| 10   | 8.293          | 170    | 0.018        |
| 11   | 8.467          | 66     | 0.007        |
| 12   | 9.360          | 946628 | 98.991       |
| 13   | 10.453         | 752    | 0.079        |
| 14   | 10.613         | 549    | 0.057        |
| 15   | 10.760         | 306    | 0.032        |
| 16   | 16.587         | 598    | 0.063        |

| Totals |  | 956278 | 100.000 |
|--------|--|--------|---------|
|        |  |        |         |

-----  
 ---< General Method Parameters >-----  
 -----

# HPLC trace1 of 5q

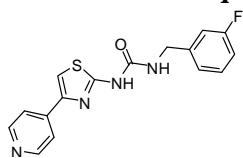

## Area % Report

Data File: C:\EZChrom Elite\Data\Roberta\RPM1299 CH3CN30 H2O70 0.1TFA 1mL 20min.met  
 1-28-2009 5-27-39 AM  
 Method: C:\EZChrom Elite-Methods\Xin\CH3CN30 H2O70 0.1TFA 1mL 20min.met  
 Acquired: 1/28/2009 5:28:21 AM  
 Printed: 1/28/2009 11:01:31 AM  
 Vial: 37

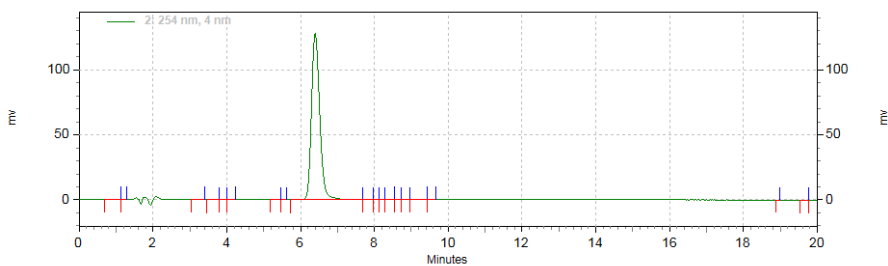

### 2: 254 nm, 4 nm Results

| Pk # | Retention Time | Area    | Area Percent |
|------|----------------|---------|--------------|
| 1    | 0.960          | 635     | 0.032        |
| 2    | 1.187          | 276     | 0.014        |
| 3    | 3.160          | 3257    | 0.162        |
| 4    | 3.507          | 330     | 0.016        |
| 5    | 3.827          | 468     | 0.023        |
| 6    | 4.013          | 438     | 0.022        |
| 7    | 5.387          | 599     | 0.030        |
| 8    | 5.547          | 126     | 0.006        |
| 9    | 6.400          | 1993205 | 99.278       |
| 10   | 7.760          | 2212    | 0.110        |
| 11   | 8.013          | 875     | 0.044        |
| 12   | 8.173          | 811     | 0.040        |
| 13   | 8.307          | 1103    | 0.055        |
| 14   | 8.627          | 728     | 0.036        |
| 15   | 8.760          | 751     | 0.037        |
| 16   | 9.200          | 1100    | 0.055        |
| 17   | 9.493          | 380     | 0.019        |
| 18   | 18.920         | 126     | 0.006        |
| 19   | 19.627         | 282     | 0.014        |
| 20   | 19.760         | 0       | 0.000        |

|        |         |         |
|--------|---------|---------|
| Totals | 2007702 | 100.000 |
|--------|---------|---------|

## Area % Report

Data File: C:\EZChrom Elite\Data\Roberta\RPM1299MeOH50 0.1%TFA H2O50 20min 1ml.met 2-2-2009 5-36-12 PM.dat  
Method: C:\EZChrom Elite-Methods\Roberta\MeOH50 0.1%TFA H2O50 20min 1ml.met  
Acquired: 2/2/2009 5:38:31 PM  
Printed: 2/2/2009 6:01:06 PM  
Vial: 18

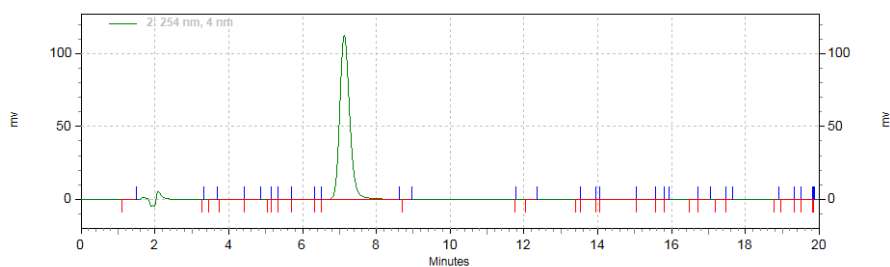

## 2: 254 nm, 4 nm Results

| PK # | Retention Time | Area    | Area Percent |
|------|----------------|---------|--------------|
| 1    | 1.347          | 549     | 0.026        |
| 2    | 3.307          | 46      | 0.002        |
| 3    | 3.493          | 228     | 0.011        |
| 4    | 4.120          | 3796    | 0.179        |
| 5    | 4.453          | 1003    | 0.047        |
| 6    | 5.107          | 207     | 0.010        |
| 7    | 5.280          | 321     | 0.015        |
| 8    | 5.467          | 761     | 0.036        |
| 9    | 6.133          | 1509    | 0.071        |
| 10   | 6.453          | 305     | 0.014        |
| 11   | 7.133          | 2107438 | 99.119       |
| 12   | 8.747          | 318     | 0.015        |
| 13   | 11.760         | 28      | 0.001        |
| 14   | 12.253         | 529     | 0.025        |
| 15   | 13.427         | 171     | 0.008        |
| 16   | 13.667         | 1051    | 0.049        |
| 17   | 14.000         | 179     | 0.008        |
| 18   | 14.973         | 2157    | 0.101        |
| 19   | 15.240         | 1495    | 0.070        |
| 20   | 15.640         | 613     | 0.029        |
| 21   | 15.853         | 197     | 0.009        |
| 22   | 16.587         | 285     | 0.013        |
| 23   | 16.867         | 461     | 0.022        |

# HPLC trace1 of compound 5s

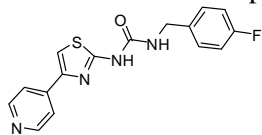

## Area % Report

Data File: C:\EZChrom Elite\Data\Roberta\RPM1300MeOH50 0.1%TFA H2O50 20min 1ml.met  
 1-30-2009 4-51-41 PM.dat  
 Method: C:\EZChrom Elite\Methods\Roberta\MeOH50 0.1%TFA H2O50 20min 1ml.met  
 Acquired: 1/30/2009 4:54:00 PM  
 Printed: 1/30/2009 5:16:39 PM  
 Vial: 16

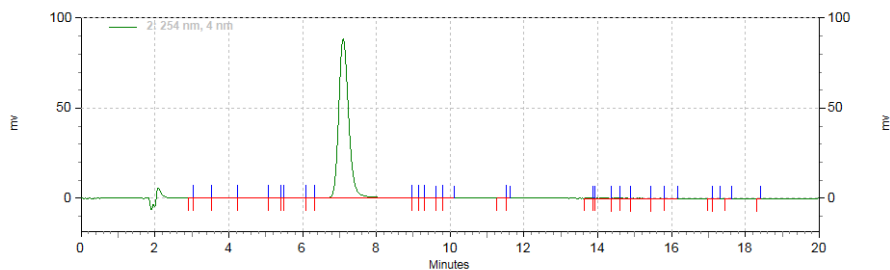

### 2: 254 nm, 4 nm Results

| Pk # | Retention Time | Area    | Area Percent |
|------|----------------|---------|--------------|
| 1    | 2.920          | 93      | 0.006        |
| 2    | 3.400          | 1358    | 0.081        |
| 3    | 3.827          | 2013    | 0.119        |
| 4    | 4.787          | 3048    | 0.181        |
| 5    | 5.307          | 1858    | 0.110        |
| 6    | 5.440          | 405     | 0.024        |
| 7    | 6.040          | 3495    | 0.207        |
| 8    | 6.173          | 1451    | 0.086        |
| 9    | 7.093          | 1660207 | 98.540       |
| 10   | 8.987          | 1047    | 0.062        |
| 11   | 9.200          | 784     | 0.047        |
| 12   | 9.320          | 1182    | 0.070        |
| 13   | 9.667          | 472     | 0.028        |
| 14   | 9.867          | 439     | 0.026        |
| 15   | 11.293         | 70      | 0.004        |
| 16   | 11.520         | 163     | 0.010        |
| 17   | 13.680         | 570     | 0.034        |
| 18   | 13.907         | 104     | 0.006        |
| 19   | 14.093         | 1142    | 0.068        |
| 20   | 14.560         | 647     | 0.038        |
| 21   | 14.680         | 697     | 0.041        |
| 22   | 15.160         | 1289    | 0.077        |
| 23   | 15.693         | 775     | 0.046        |



**Area % Report**

Data File: C:\EZChrom Elite\Data\Roberta\RPM1300 CH3CN30 H2O70 0.1TFA 1mL 20min.met  
 1-27-2009 8:27-17 PM  
 Method: C:\EZChrom Elite-Methods\Xin\CH3CN30 H2O70 0.1TFA 1mL 20min.met  
 Acquired: 1/27/2009 8:27:59 PM  
 Printed: 1/28/2009 11:03:02 AM  
 Vial: 24

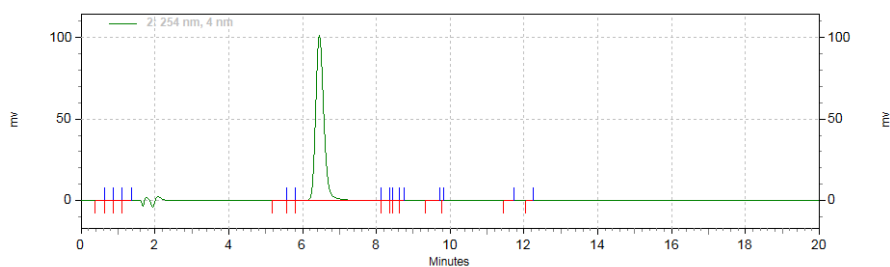

2: 254 nm, 4 nm Results

| PK # | Retention Time | Area    | Area Percent |
|------|----------------|---------|--------------|
| 1    | 0.413          | 294     | 0.019        |
| 2    | 0.760          | 883     | 0.056        |
| 3    | 0.933          | 1289    | 0.082        |
| 4    | 1.213          | 864     | 0.055        |
| 5    | 5.320          | 1140    | 0.073        |
| 6    | 5.613          | 499     | 0.032        |
| 7    | 6.453          | 1556280 | 99.498       |
| 8    | 8.147          | 692     | 0.044        |
| 9    | 8.400          | 186     | 0.012        |
| 10   | 8.507          | 250     | 0.016        |
| 11   | 8.653          | 168     | 0.011        |
| 12   | 9.373          | 1006    | 0.064        |
| 13   | 9.787          | 54      | 0.003        |
| 14   | 11.520         | 296     | 0.019        |
| 15   | 12.107         | 234     | 0.015        |

|        |         |         |
|--------|---------|---------|
| Totals | 1564135 | 100.000 |
|--------|---------|---------|

-----  
 --< General Method Parameters >-----  
 -----

HPLC trace1 of **5b**

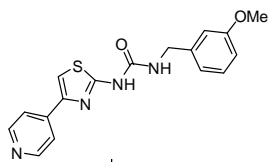

Area % Report

Data File: C:\EZChrom Elite\Enterprise\Projects\Nick Lawrence\Data\Roberta\RPM1240Batch23Feb2009  
 CH3CN 30% TFA 0.1 in H2O 70% 1ml 20 min.met 3-12-2009 11-50-41 PM  
 Method: C:\EZChrom Elite\Enterprise\Projects\Nick Lawrence\Method\Roberta\CH3CN 30% TFA 0.1 in  
 H2O 70% 1ml 20 min.met  
 Acquired: 3/12/2009 11:52:10 PM  
 Printed: 3/13/2009 10:16:44 AM

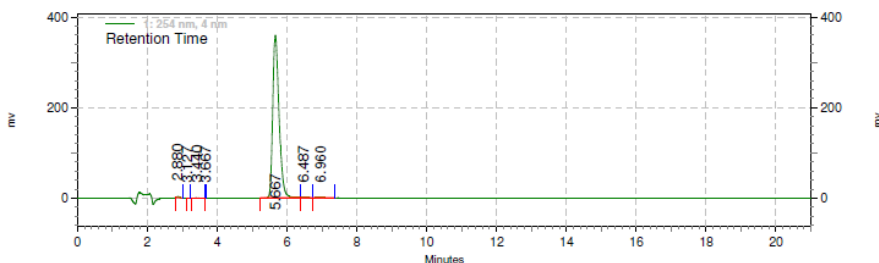

1: 254 nm, 4 nm  
 Results

| Retention Time | Area    | Area %  | Height | Height % |        |
|----------------|---------|---------|--------|----------|--------|
| 2.880          | 12580   | 0.28    | 2398   | 0.66     |        |
| 3.127          | 224     | 0.00    | 36     | 0.01     |        |
| 3.440          | 2986    | 0.07    | 306    | 0.08     |        |
| 3.667          | 50      | 0.00    | 40     | 0.01     |        |
| 5.667          | 4499536 | 98.94   | 359528 | 98.70    |        |
| 6.487          | 13493   | 0.30    | 864    | 0.24     |        |
| 6.960          | 18897   | 0.42    | 1101   | 0.30     |        |
| Totals         |         | 4547766 | 100.00 | 364273   | 100.00 |

---< General Method Parameters >---

Jasco Pumps

```

=====
Model:          PU-2086
Control mode:   Binary HPG
Solvent A:      0.1 TFA in Water
Solvent B:      CH3CN
Solvent C:      N/A
Solvent D:      N/A
Pressure range
Min. pressure:  3.0 MPa
Max. pressure:  50.0 MPa
    
```

Area % Report

Data File: C:\EZChrom Elite\Enterprise\Projects\Nick Lawrence\Data\Roberta\RPM1240Batch23Feb2009  
 MeOH 50 TFA 0.1 in H2O 50 1ml 20 min.met 3-10-2009 8-39-56 PM  
 Method: C:\EZChrom Elite\Enterprise\Projects\Nick Lawrence\Method\Roberta\MeOH 50% TFA 0.1 in H2O 50% 1ml 20 min.met  
 Acquired: 3/10/2009 8:41:24 PM  
 Printed: 3/11/2009 9:48:39 AM

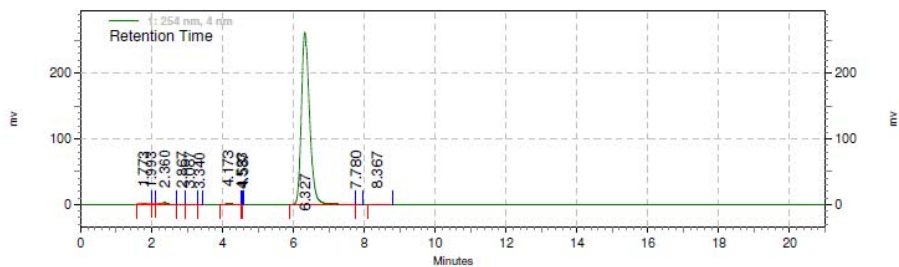

1: 254 nm, 4 nm  
 Results

| Retention Time | Area    | Area % | Height | Height % |
|----------------|---------|--------|--------|----------|
| 1.773          | 14426   | 0.33   | 1493   | 0.55     |
| 1.993          | 1362    | 0.03   | 252    | 0.09     |
| 2.360          | 36703   | 0.84   | 3017   | 1.12     |
| 2.867          | 989     | 0.02   | 116    | 0.04     |
| 3.087          | 2320    | 0.05   | 225    | 0.08     |
| 3.340          | 238     | 0.01   | 49     | 0.02     |
| 4.173          | 20116   | 0.46   | 1567   | 0.58     |
| 4.533          | 54      | 0.00   | 26     | 0.01     |
| 4.587          | 55      | 0.00   | 36     | 0.01     |
| 6.327          | 4262319 | 97.99  | 261972 | 97.22    |
| 7.780          | 681     | 0.02   | 120    | 0.04     |
| 8.367          | 10500   | 0.24   | 579    | 0.21     |

|        |         |        |        |        |
|--------|---------|--------|--------|--------|
| Totals | 4349763 | 100.00 | 269452 | 100.00 |
|--------|---------|--------|--------|--------|

-----  
 << General Method Parameters >>-----  
 -----

Jasco Pumps

=====  
 Model: PU-2086  
 Control mode: Binary HPG  
 Solvent A: 0.1 TFA in Water  
 Solvent B: MeOH

# HPLC trace1 of 5d

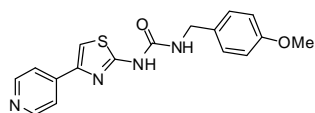

## Area % Report

Data File: C:\EZChrom Elite\Enterprise\Projects\Nick Lawrence\Data\Roberta\RPM1313 CH3CN 30%  
 TFA 0.1 in H2O 70% 1ml 20 min.met 3-13-2009 4-21-48 AM  
 Method: C:\EZChrom Elite\Enterprise\Projects\Nick Lawrence\Method\Roberta\CH3CN 30% TFA 0.1 in  
 H2O 70% 1ml 20 min.met  
 Acquired: 3/13/2009 4:23:19 AM  
 Printed: 3/13/2009 10:36:26 AM

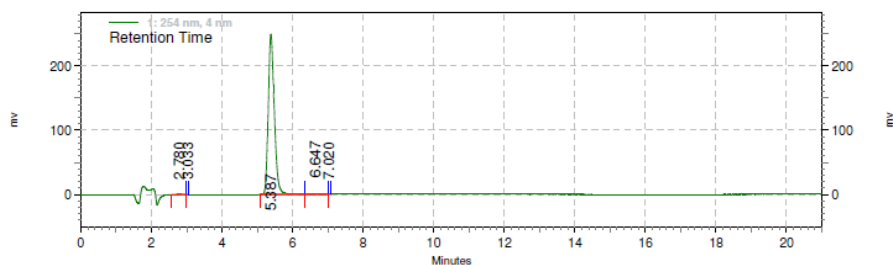

### 1: 254 nm, 4 nm Results

| Retention Time | Area    | Area % | Height | Height % |
|----------------|---------|--------|--------|----------|
| 2.780          | 8230    | 0.27   | 1063   | 0.42     |
| 3.033          | 178     | 0.01   | 58     | 0.02     |
| 5.387          | 2968436 | 99.15  | 249493 | 99.13    |
| 6.647          | 16876   | 0.56   | 992    | 0.39     |
| 7.020          | 164     | 0.01   | 64     | 0.03     |
| Totals         |         |        |        |          |
|                | 2993884 | 100.00 | 251670 | 100.00   |

-----  
 < General Method Parameters >  
 -----

#### Jasco Pumps

=====  
 Model: PU-2086  
 Control mode: Binary HPG  
 Solvent A: 0.1 TFA in Water  
 Solvent B: CH3CN  
 Solvent C: N/A  
 Solvent D: N/A  
 Pressure range  
 Min. pressure: 3.0 MPa  
 Max. pressure: 50.0 MPa

Time program:

Area % Report

Data File: C:\EZChrom Elite\Enterprise\Projects\Nick Lawrence\Data\Roberta\RPM1313 MeOH 50 TFA  
 0.1 in H2O 50 1ml 20 min.met 3-11-2009 1-11-02 AM  
 Method: C:\EZChrom Elite\Enterprise\Projects\Nick Lawrence\Method\Roberta\MeOH 50% TFA 0.1 in  
 H2O 50% 1ml 20 min.met  
 Acquired: 3/11/2009 1:12:34 AM  
 Printed: 3/11/2009 10:08:27 AM

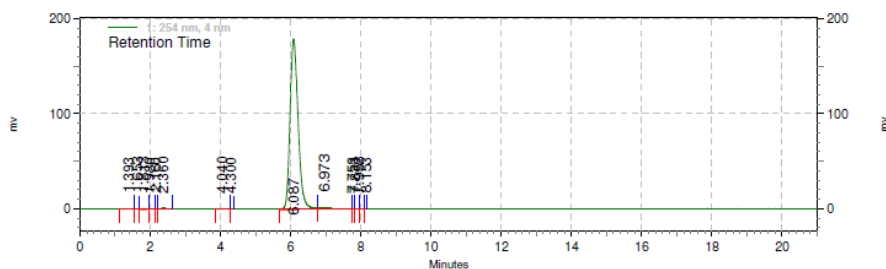

1: 254 nm, 4 nm

Results

| Retention Time | Area    | Area % | Height | Height % |
|----------------|---------|--------|--------|----------|
| 1.393          | 1117    | 0.04   | 93     | 0.05     |
| 1.653          | 713     | 0.02   | 151    | 0.08     |
| 1.813          | 6991    | 0.24   | 741    | 0.40     |
| 1.980          | 1492    | 0.05   | 181    | 0.10     |
| 2.160          | 400     | 0.01   | 119    | 0.06     |
| 2.360          | 9411    | 0.32   | 948    | 0.52     |
| 4.040          | 6467    | 0.22   | 513    | 0.28     |
| 4.300          | 196     | 0.01   | 53     | 0.03     |
| 6.087          | 2836699 | 97.74  | 178743 | 97.49    |
| 6.973          | 37761   | 1.30   | 1560   | 0.85     |
| 7.753          | 331     | 0.01   | 89     | 0.05     |
| 7.833          | 376     | 0.01   | 81     | 0.04     |
| 7.953          | 225     | 0.01   | 39     | 0.02     |
| 8.153          | 56      | 0.00   | 33     | 0.02     |

|        |         |        |        |        |
|--------|---------|--------|--------|--------|
| Totals | 2902235 | 100.00 | 183344 | 100.00 |
|--------|---------|--------|--------|--------|

-----  
 ---< General Method Parameters >-----  
 -----

Jasco Pumps

=====  
 Model: PU-2086  
 Control mode: Binary HPG

HPLC trace 1 of 5e

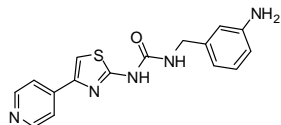

Area % Report

Data File: C:\EZChrom Elite\Enterprise\Projects\Nick Lawrence\Data\Roberta\RPM1332 CH3CN 15%  
 TFA 0.1 in H2O 85% 1ml 20 min TEMP.met 6-9-2010 5-11-46 PM.dat  
 Method: C:\EZChrom Elite\Enterprise\Projects\Nick Lawrence\Method\Roberta\MeOH 50% H2O 50%  
 1ml 20 min TEMPL.met  
 Acquired: 6/9/2010 5:14:01 PM  
 Printed: 6/10/2010 11:27:51 AM

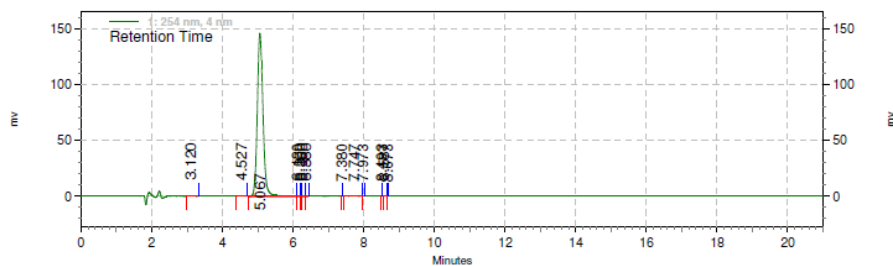

1: 254 nm, 4 nm  
 Results

| Retention Time | Area    | Area % | Height | Height % |
|----------------|---------|--------|--------|----------|
| 3.120          | 3259    | 0.20   | 378    | 0.26     |
| 4.527          | 5255    | 0.32   | 565    | 0.38     |
| 5.067          | 1627459 | 99.19  | 145749 | 98.81    |
| 6.120          | 679     | 0.04   | 173    | 0.12     |
| 6.200          | 288     | 0.02   | 115    | 0.08     |
| 6.280          | 422     | 0.03   | 54     | 0.04     |
| 6.380          | 164     | 0.01   | 59     | 0.04     |
| 7.380          | 37      | 0.00   | 43     | 0.03     |
| 7.747          | 2710    | 0.17   | 180    | 0.12     |
| 7.973          | 136     | 0.01   | 68     | 0.05     |
| 8.493          | 36      | 0.00   | 27     | 0.02     |
| 8.587          | 247     | 0.02   | 57     | 0.04     |
| 8.673          | 42      | 0.00   | 39     | 0.03     |

| Totals | Area    | Area % | Height | Height % |
|--------|---------|--------|--------|----------|
|        | 1640734 | 100.00 | 147507 | 100.00   |

Spectrum Max  
 Plot Results

| Retention Time | Area | Area % | Height | Height % |
|----------------|------|--------|--------|----------|
| 0.140          | 2835 | 0.10   | 586    | 0.17     |
| 0.287          | 2732 | 0.10   | 670    | 0.20     |
| 0.360          | 1429 | 0.05   | 826    | 0.24     |
| 0.433          | 2686 | 0.09   | 1028   | 0.30     |

Area % Report

Data File: CAEZChrom Elite\Enterprise\Projects\Nick Lawrence\Data\Roberta\RPM1332 MeOH 20% TFA  
 0.1 in H2O 80% 1ml 20 min TEMPL.met 6-9-2010 1-27-01 PM.dat  
 Method: CAEZChrom Elite\Enterprise\Projects\Nick Lawrence\Method\Roberta\MeOH 50% H2O 50%  
 1ml 20 min TEMPL.met  
 Acquired: 6/9/2010 1:29:16 PM  
 Printed: 6/10/2010 11:25:13 AM

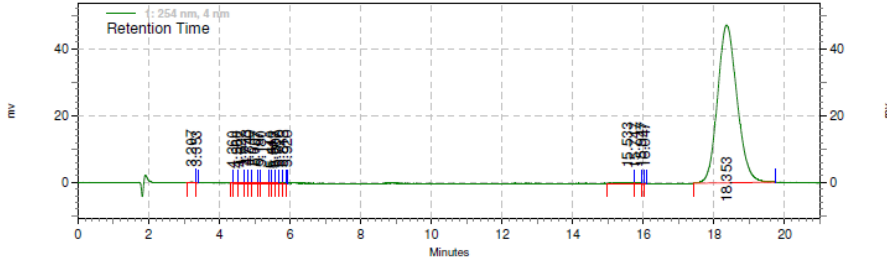

1: 254 nm, 4 nm  
 Results

| Retention Time | Area           | Area %        | Height       | Height %      |
|----------------|----------------|---------------|--------------|---------------|
| 3.207          | 1713           | 0.09          | 224          | 0.46          |
| 3.353          | 107            | 0.01          | 43           | 0.09          |
| 4.360          | 54             | 0.00          | 38           | 0.08          |
| 4.500          | 247            | 0.01          | 57           | 0.12          |
| 4.627          | 351            | 0.02          | 58           | 0.12          |
| 4.773          | 507            | 0.03          | 107          | 0.22          |
| 4.840          | 469            | 0.03          | 108          | 0.22          |
| 5.007          | 922            | 0.05          | 125          | 0.25          |
| 5.107          | 351            | 0.02          | 112          | 0.23          |
| 5.180          | 1369           | 0.08          | 104          | 0.21          |
| 5.440          | 234            | 0.01          | 75           | 0.15          |
| 5.513          | 285            | 0.02          | 74           | 0.15          |
| 5.607          | 221            | 0.01          | 71           | 0.14          |
| 5.720          | 295            | 0.02          | 67           | 0.14          |
| 5.813          | 175            | 0.01          | 68           | 0.14          |
| 5.920          | 91             | 0.00          | 61           | 0.12          |
| 15.533         | 6284           | 0.34          | 237          | 0.48          |
| 15.747         | 1099           | 0.06          | 173          | 0.35          |
| 15.947         | 204            | 0.01          | 64           | 0.13          |
| 16.047         | 104            | 0.01          | 62           | 0.13          |
| 18.353         | 1807016        | 99.17         | 47235        | 96.08         |
| <b>Totals</b>  | <b>1822098</b> | <b>100.00</b> | <b>49163</b> | <b>100.00</b> |

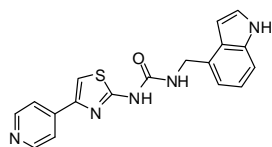

## Area % Report

Data File: C:\EZChrom Elite\Enterprise\Projects\Nick Lawrence\Data\Roberta\RPM1446 MeOH 50% TFA 0.1 in H2O 50% 1ml 20 min TEMPL.met 1-6-2010 11-14-23 AM.dat  
 Method: C:\EZChrom Elite\Enterprise\Projects\Nick Lawrence\Method\Roberta\MeOH 50% TFA 0.1 in H2O 50% 1ml 20 min TEMPL.met  
 Acquired: 1/6/2010 11:16:41 AM  
 Printed: 1/6/2010 12:07:12 PM

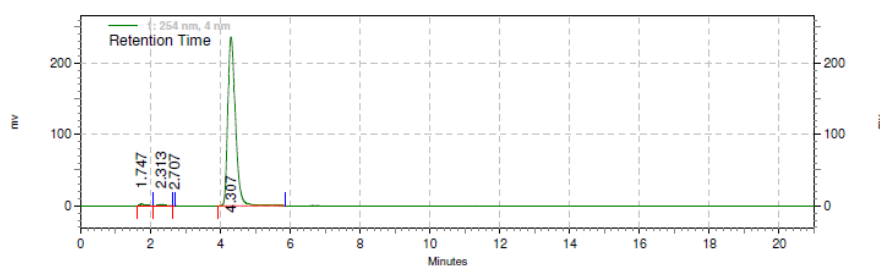
**1: 254 nm, 4 nm**  
 Results

| Retention Time | Area    | Area % | Height | Height % |
|----------------|---------|--------|--------|----------|
| 1.747          | 29667   | 0.81   | 2726   | 1.13     |
| 2.313          | 24951   | 0.68   | 2189   | 0.91     |
| 2.707          | 134     | 0.00   | 41     | 0.02     |
| 4.307          | 3599745 | 98.50  | 236252 | 97.95    |
| <b>Totals</b>  |         |        |        |          |
|                | 3654497 | 100.00 | 241208 | 100.00   |

**Spectrum Max**  
 Plot Results

| Retention Time | Area | Area % | Height | Height % |
|----------------|------|--------|--------|----------|
| 0.107          | 821  | 0.01   | 472    | 0.06     |
| 0.160          | 936  | 0.01   | 487    | 0.07     |
| 0.267          | 527  | 0.01   | 364    | 0.05     |
| 0.340          | 832  | 0.01   | 337    | 0.05     |
| 0.420          | 1478 | 0.02   | 628    | 0.09     |
| 0.473          | 182  | 0.00   | 401    | 0.06     |
| 0.553          | 2500 | 0.03   | 766    | 0.11     |
| 0.680          | 1229 | 0.02   | 600    | 0.08     |
| 0.713          | 439  | 0.01   | 722    | 0.10     |
| 0.780          | 1208 | 0.02   | 597    | 0.08     |
| 0.827          | 526  | 0.01   | 403    | 0.06     |
| 0.973          | 1659 | 0.02   | 693    | 0.10     |
| 1.060          | 1651 | 0.02   | 451    | 0.06     |



Area % Report

Data File: C:\EZChrom Elite\Enterprise\Projects\Nick Lawrence\Data\Roberta\RPM1446 CH3CN 30%  
 TFA 0.1 in H2O 70% 1ml 20 min TEMP.met 6-8-2010 12-38-37 PM.dat  
 Method: C:\EZChrom Elite\Enterprise\Projects\Nick Lawrence\Method\Roberta\MeOH 50% H2O 50%  
 1ml 20 min TEMPL.met  
 Acquired: 6/8/2010 12:40:53 PM  
 Printed: 6/10/2010 2:39:17 PM

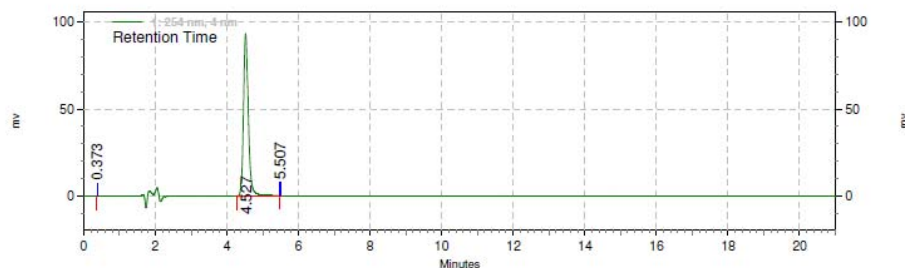

1: 254 nm, 4 nm  
 Results

| Retention Time | Area   | Area % | Height | Height % |
|----------------|--------|--------|--------|----------|
| 0.373          | 20     | 0.00   | 22     | 0.02     |
| 4.527          | 886352 | 99.99  | 93095  | 99.92    |
| 5.507          | 59     | 0.01   | 48     | 0.05     |
| <b>Totals</b>  |        |        |        |          |
|                | 886431 | 100.00 | 93165  | 100.00   |

Spectrum Max  
 Plot Results

| Retention Time | Area  | Area % | Height | Height % |
|----------------|-------|--------|--------|----------|
| 0.200          | 1452  | 0.05   | 0      | 0.00     |
| 0.300          | 1345  | 0.05   | 428    | 0.08     |
| 0.413          | 4077  | 0.14   | 1076   | 0.21     |
| 0.467          | 2927  | 0.10   | 1151   | 0.22     |
| 0.527          | 4939  | 0.17   | 1083   | 0.21     |
| 0.607          | 6394  | 0.22   | 1315   | 0.25     |
| 0.680          | 5888  | 0.20   | 1782   | 0.34     |
| 0.740          | 5826  | 0.20   | 1860   | 0.36     |
| 0.807          | 10250 | 0.35   | 1989   | 0.38     |
| 0.933          | 16170 | 0.55   | 2267   | 0.44     |
| 1.020          | 7670  | 0.26   | 2549   | 0.49     |
| 1.067          | 8037  | 0.28   | 2524   | 0.48     |
| 1.147          | 15410 | 0.53   | 2833   | 0.54     |
| 1.220          | 11902 | 0.41   | 3046   | 0.59     |

# HPLC trace1 of 5g

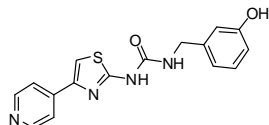

## Area % Report

Data File: C:\EZChrom Elite\Enterprise\Projects\Nick Lawrence\Data\Roberta\RPM1447 Batch 12.10.2009  
 MeOH 40% TFA 0.1 in H2O 60% 1ml 20 min TEMPL.met 12-15-2009 3-26-06 PM  
 Method: C:\EZChrom Elite\Enterprise\Projects\Nick Lawrence\Method\Roberta\MeOH 40% TFA 0.1 in H2O 60% 1ml 20 min TEMPL.met  
 Acquired: 12/15/2009 3:27:37 PM  
 Printed: 12/15/2009 3:50:26 PM

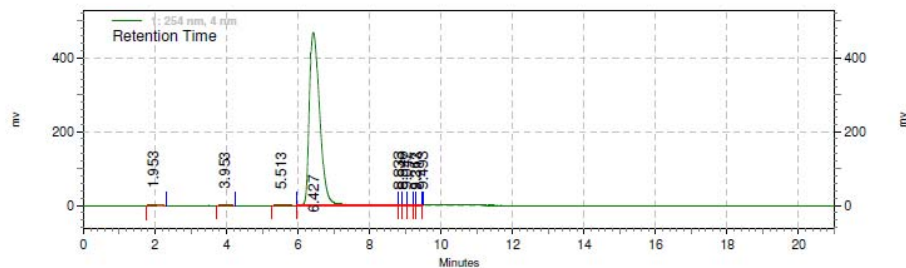

### 1: 254 nm, 4 nm Results

| Retention Time | Area    | Area % | Height | Height % |
|----------------|---------|--------|--------|----------|
| 1.953          | 59120   | 0.61   | 3480   | 0.73     |
| 3.953          | 21647   | 0.22   | 1694   | 0.36     |
| 5.513          | 26563   | 0.28   | 1512   | 0.32     |
| 6.427          | 9531861 | 98.83  | 467699 | 98.39    |
| 8.833          | 1730    | 0.02   | 290    | 0.06     |
| 8.940          | 1408    | 0.01   | 232    | 0.05     |
| 9.047          | 1443    | 0.01   | 201    | 0.04     |
| 9.267          | 476     | 0.00   | 113    | 0.02     |
| 9.313          | 546     | 0.01   | 95     | 0.02     |
| 9.493          | 28      | 0.00   | 33     | 0.01     |

|        |         |        |        |        |
|--------|---------|--------|--------|--------|
| Totals | 9644822 | 100.00 | 475349 | 100.00 |
|--------|---------|--------|--------|--------|

### Spectrum Max Plot Results

| Retention Time | Area | Area % | Height | Height % |
|----------------|------|--------|--------|----------|
| 0.200          | 1229 | 0.01   | 466    | 0.05     |
| 0.313          | 487  | 0.00   | 678    | 0.07     |
| 0.407          | 1194 | 0.01   | 356    | 0.04     |
| 0.487          | 147  | 0.00   | 152    | 0.02     |
| 0.533          | 501  | 0.00   | 345    | 0.04     |
| 0.687          | 1105 | 0.01   | 501    | 0.05     |
| 0.760          | 533  | 0.00   | 653    | 0.07     |

**Area % Report**

Data File: C:\EZChrom Elite\Enterprise\Projects\Nick Lawrence\Data\Roberta\RPM1447 CH3CN 20%  
 TFA 0.1 in H2O 80% 1ml 20 min TEMP.met 12-3-2009 1-12-02 PM  
 Method: C:\EZChrom Elite\Enterprise\Projects\Nick Lawrence\Method\Roberta\CH3CN 20% TFA 0.1 in  
 H2O 80% 1ml 20 min TEMP.met  
 Acquired: 12/3/2009 1:13:34 PM  
 Printed: 12/3/2009 1:37:05 PM

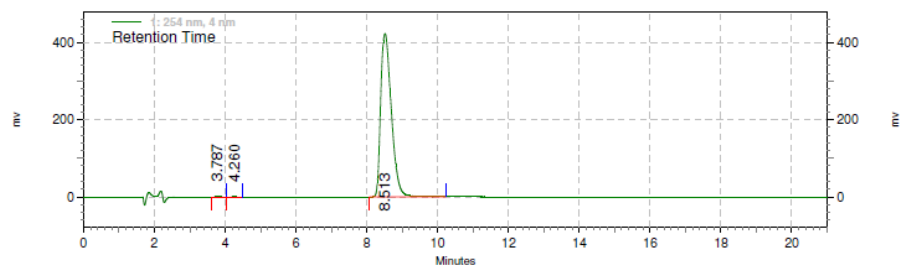

**1: 254 nm, 4 nm  
Results**

| Retention Time | Area    | Area % | Height | Height % |
|----------------|---------|--------|--------|----------|
| 3.787          | 10990   | 0.12   | 1188   | 0.28     |
| 4.260          | 5299    | 0.06   | 466    | 0.11     |
| 8.513          | 8834572 | 99.82  | 422750 | 99.61    |
| <b>Totals</b>  |         |        |        |          |
|                | 8850861 | 100.00 | 424404 | 100.00   |

**Spectrum Max  
Plot Results**

| Retention Time | Area    | Area % | Height | Height % |
|----------------|---------|--------|--------|----------|
| 0.373          | 476     | 0.00   | 425    | 0.03     |
| 0.500          | 1092    | 0.01   | 548    | 0.04     |
| 0.607          | 826     | 0.00   | 530    | 0.04     |
| 0.693          | 782     | 0.00   | 310    | 0.02     |
| 0.827          | 1282    | 0.01   | 448    | 0.03     |
| 0.920          | 1993    | 0.01   | 558    | 0.04     |
| 1.113          | 2982    | 0.02   | 710    | 0.05     |
| 1.213          | 1310    | 0.01   | 534    | 0.04     |
| 1.273          | 1880    | 0.01   | 702    | 0.05     |
| 1.347          | 773     | 0.00   | 566    | 0.04     |
| 1.393          | 1292    | 0.01   | 566    | 0.04     |
| 1.447          | 2775    | 0.01   | 516    | 0.03     |
| 1.740          | 1556971 | 8.25   | 293241 | 19.83    |
| 1.847          | 78950   | 0.42   | 11450  | 0.77     |

# HPLC trace1 of 5h

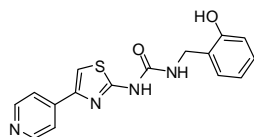

## Area % Report

Data File: CAEZChrom Elite\Enterprise\Projects\Nick Lawrence\Data\Roberta\RPM1448 MeOH 40% TFA 0.1 in H2O 60% 1ml 20 min TEMPL.met 1-5-2010 10-48-57 PM  
 Method: CAEZChrom Elite\Enterprise\Projects\Nick Lawrence\Method\Roberta\MeOH 40% TFA 0.1 in H2O 60% 1ml 20 min TEMPL.met  
 Acquired: 1/5/2010 10:50:30 PM  
 Printed: 1/6/2010 9:57:42 AM

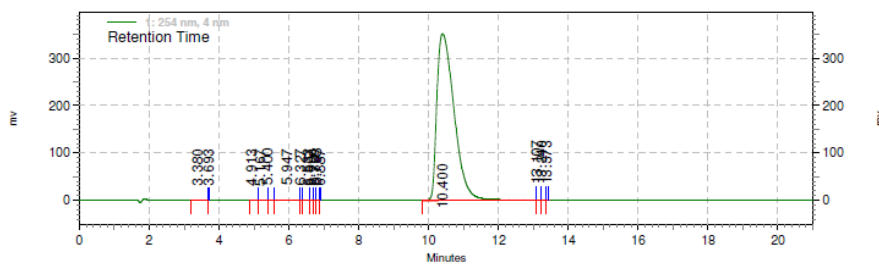

### 1: 254 nm, 4 nm Results

| Retention Time | Area            | Area %        | Height        | Height %      |
|----------------|-----------------|---------------|---------------|---------------|
| 3.380          | 3310            | 0.03          | 276           | 0.08          |
| 3.693          | 66              | 0.00          | 40            | 0.01          |
| 4.913          | 602             | 0.00          | 64            | 0.02          |
| 5.167          | 632             | 0.01          | 61            | 0.02          |
| 5.400          | 421             | 0.00          | 66            | 0.02          |
| 5.947          | 5952            | 0.05          | 326           | 0.09          |
| 6.327          | 163             | 0.00          | 61            | 0.02          |
| 6.533          | 729             | 0.01          | 97            | 0.03          |
| 6.607          | 453             | 0.00          | 94            | 0.03          |
| 6.720          | 102             | 0.00          | 54            | 0.02          |
| 6.793          | 199             | 0.00          | 54            | 0.02          |
| 6.887          | 67              | 0.00          | 62            | 0.02          |
| 10.400         | 12067135        | 99.87         | 351453        | 99.50         |
| 13.107         | 1563            | 0.01          | 253           | 0.07          |
| 13.240         | 843             | 0.01          | 156           | 0.04          |
| 13.373         | 315             | 0.00          | 90            | 0.03          |
| <b>Totals</b>  | <b>12082552</b> | <b>100.00</b> | <b>353207</b> | <b>100.00</b> |

### Spectrum Max Plot Results

| Retention Time | Area | Area % | Height | Height % |
|----------------|------|--------|--------|----------|
| 0.153          | 104  | 0.00   | 69     | 0.01     |

Area % Report

Data File: C:\EZChrom Elite\Enterprise\Projects\Nick Lawrence\Data\Roberta\RPM1448 CH3CN 20%  
 TFA 0.1 in H2O 80% 1ml 20 min TEMP.met 12-31-2009 3-54-50 PM  
 Method: C:\EZChrom Elite\Enterprise\Projects\Nick Lawrence\Method\Roberta\CH3CN 20% TFA 0.1 in  
 H2O 80% 1ml 20 min TEMP.met  
 Acquired: 12/31/2009 3:56:21 PM  
 Printed: 1/5/2010 9:44:20 AM

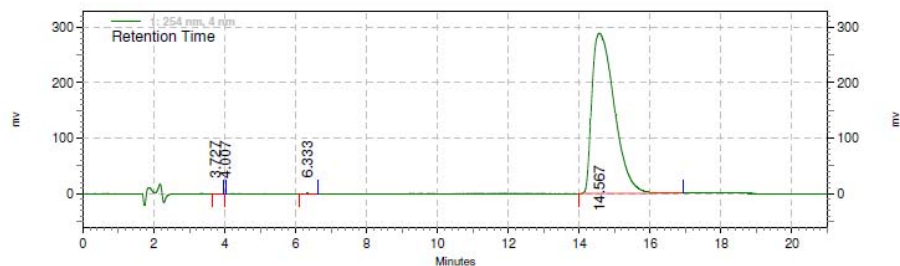

1: 254 nm, 4 nm  
 Results

| Retention Time | Area     | Area % | Height | Height % |
|----------------|----------|--------|--------|----------|
| 3.727          | 2541     | 0.02   | 278    | 0.10     |
| 4.007          | 15       | 0.00   | 30     | 0.01     |
| 6.333          | 5296     | 0.04   | 366    | 0.13     |
| 14.567         | 12661259 | 99.94  | 289021 | 99.77    |
| <b>Totals</b>  |          |        |        |          |
|                | 12669111 | 100.00 | 289695 | 100.00   |

Spectrum Max  
 Plot Results

| Retention Time | Area | Area % | Height | Height % |
|----------------|------|--------|--------|----------|
| 0.247          | 1374 | 0.01   | 843    | 0.05     |
| 0.273          | 850  | 0.00   | 686    | 0.04     |
| 0.380          | 937  | 0.00   | 550    | 0.04     |
| 0.453          | 442  | 0.00   | 467    | 0.03     |
| 0.600          | 437  | 0.00   | 603    | 0.04     |
| 0.673          | 590  | 0.00   | 556    | 0.04     |
| 0.713          | 193  | 0.00   | 201    | 0.01     |
| 0.793          | 891  | 0.00   | 522    | 0.03     |
| 0.893          | 1386 | 0.01   | 570    | 0.04     |
| 1.020          | 1158 | 0.00   | 50     | 0.00     |
| 1.293          | 2479 | 0.01   | 785    | 0.05     |
| 1.347          | 1431 | 0.01   | 628    | 0.04     |
| 1.433          | 1670 | 0.01   | 147    | 0.01     |

# HPLC trace1 of 5i

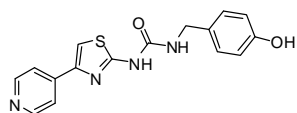

## Area % Report

Data File: C:\EZChrom Elite\Enterprise\Projects\Nick Lawrence\Data\Roberta\RPM1333 MeOH 40% TFA 0.1 in H2O 60% 1ml 20 min TEMPL.met 1-5-2010 9-18-35 PM  
 Method: C:\EZChrom Elite\Enterprise\Projects\Nick Lawrence\Method\Roberta\MeOH 40% TFA 0.1 in H2O 60% 1ml 20 min TEMPL.met  
 Acquired: 1/5/2010 9:20:06 PM  
 Printed: 1/6/2010 9:54:04 AM

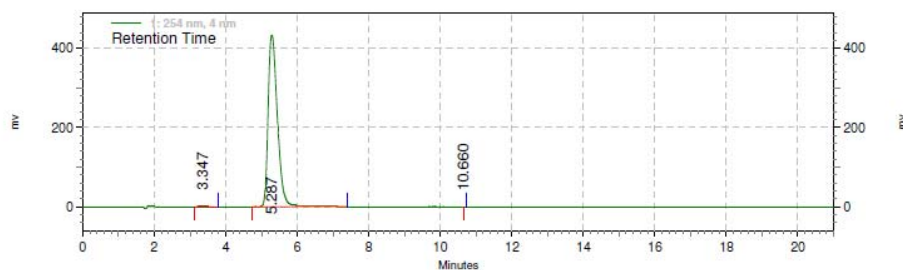

### 1: 254 nm, 4 nm

#### Results

| Retention Time | Area    | Area % | Height | Height % |
|----------------|---------|--------|--------|----------|
| 3.347          | 33284   | 0.42   | 2533   | 0.58     |
| 5.287          | 7825463 | 99.58  | 433348 | 99.41    |
| 10.660         | 108     | 0.00   | 22     | 0.01     |
| <b>Totals</b>  |         |        |        |          |
|                | 7858855 | 100.00 | 435903 | 100.00   |

### Spectrum Max

#### Plot Results

| Retention Time | Area | Area % | Height | Height % |
|----------------|------|--------|--------|----------|
| 0.207          | 572  | 0.00   | 480    | 0.06     |
| 0.300          | 885  | 0.01   | 496    | 0.06     |
| 0.367          | 967  | 0.01   | 436    | 0.05     |
| 0.460          | 615  | 0.01   | 444    | 0.06     |
| 0.513          | 603  | 0.01   | 273    | 0.03     |
| 0.647          | 963  | 0.01   | 544    | 0.07     |
| 0.773          | 506  | 0.00   | 442    | 0.05     |
| 0.820          | 401  | 0.00   | 412    | 0.05     |
| 0.840          | 662  | 0.01   | 29     | 0.00     |
| 0.993          | 421  | 0.00   | 481    | 0.06     |
| 1.067          | 958  | 0.01   | 444    | 0.06     |
| 1.173          | 375  | 0.00   | 175    | 0.02     |
| 1.260          | 589  | 0.00   | 385    | 0.05     |
| 1.327          | 610  | 0.01   | 449    | 0.06     |

Area % Report

Data File: CAEZChrom Elite\Enterprise\Projects\Nick Lawrence\Data\Roberta\RPM1333 CH3CN 20%  
 TFA 0.1 in H2O 80% 1ml 20 min TEMP.met 12-31-2009 6-55-36 PM  
 Method: CAEZChrom Elite\Enterprise\Projects\Nick Lawrence\Method\Roberta\CH3CN 20% TFA 0.1 in  
 H2O 80% 1ml 20 min TEMP.met  
 Acquired: 12/31/2009 6:57:07 PM  
 Printed: 1/5/2010 9:48:26 AM

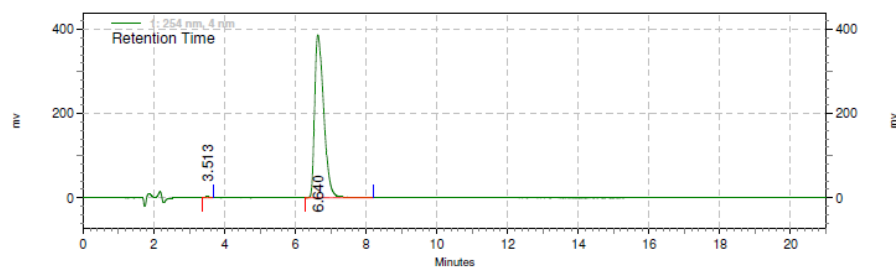

I: 254 nm, 4 nm

Results

| Retention Time | Area    | Area % | Height | Height % |
|----------------|---------|--------|--------|----------|
| 3.513          | 20746   | 0.30   | 2472   | 0.64     |
| 6.640          | 6916161 | 99.70  | 386800 | 99.36    |
| <b>Totals</b>  |         |        |        |          |
|                | 6936907 | 100.00 | 389272 | 100.00   |

Spectrum Max

Plot Results

| Retention Time | Area | Area % | Height | Height % |
|----------------|------|--------|--------|----------|
| 0.113          | 796  | 0.01   | 556    | 0.04     |
| 0.267          | 901  | 0.01   | 479    | 0.04     |
| 0.333          | 717  | 0.01   | 0      | 0.00     |
| 0.460          | 74   | 0.00   | 91     | 0.01     |
| 0.487          | 89   | 0.00   | 100    | 0.01     |
| 0.547          | 368  | 0.00   | 460    | 0.04     |
| 0.607          | 573  | 0.00   | 586    | 0.05     |
| 0.660          | 387  | 0.00   | 302    | 0.02     |
| 0.747          | 509  | 0.00   | 221    | 0.02     |
| 0.827          | 346  | 0.00   | 185    | 0.01     |
| 0.980          | 715  | 0.01   | 403    | 0.03     |
| 1.027          | 563  | 0.00   | 451    | 0.04     |
| 1.100          | 430  | 0.00   | 0      | 0.00     |
| 1.220          | 379  | 0.00   | 403    | 0.03     |
| 1.313          | 198  | 0.00   | 298    | 0.02     |

# HPLC trace1 of 5j

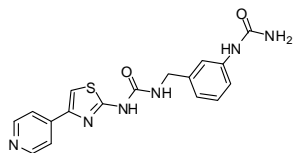

## Area % Report

Data File: C:\EZChrom Elite\Enterprise\Projects\Nick Lawrence\Data\Roberta\RPM1499 CH3CN 20%  
 TFA 0.1 in H2O 80% 1ml 20 min TEMP.met 12-3-2009 12-26-51 PM  
 Method: C:\EZChrom Elite\Enterprise\Projects\Nick Lawrence\Method\Roberta\CH3CN 20% TFA 0.1 in  
 H2O 80% 1ml 20 min TEMP.met  
 Acquired: 12/3/2009 12:28:19 PM  
 Printed: 12/3/2009 12:59:18 PM

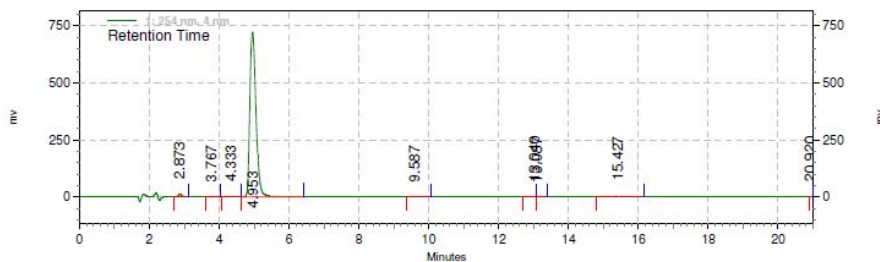

### 1: 254 nm, 4 nm

#### Results

| Retention Time | Area    | Area % | Height | Height % |
|----------------|---------|--------|--------|----------|
| 2.873          | 84478   | 0.93   | 11364  | 1.54     |
| 3.767          | 5495    | 0.06   | 564    | 0.08     |
| 4.333          | 26217   | 0.29   | 2207   | 0.30     |
| 4.953          | 8823030 | 97.62  | 721449 | 97.62    |
| 9.587          | 7902    | 0.09   | 375    | 0.05     |
| 13.040         | 3079    | 0.03   | 239    | 0.03     |
| 13.087         | 2043    | 0.02   | 219    | 0.03     |
| 15.427         | 85950   | 0.95   | 2591   | 0.35     |
| 20.920         | 159     | 0.00   | 34     | 0.00     |

| Totals | Area    | Area % | Height | Height % |
|--------|---------|--------|--------|----------|
|        | 9038353 | 100.00 | 739042 | 100.00   |

### Spectrum Max

#### Plot Results

| Retention Time | Area | Area % | Height | Height % |
|----------------|------|--------|--------|----------|
| 0.173          | 361  | 0.00   | 237    | 0.01     |
| 0.293          | 376  | 0.00   | 281    | 0.01     |
| 0.327          | 191  | 0.00   | 144    | 0.01     |
| 0.407          | 280  | 0.00   | 211    | 0.01     |
| 0.487          | 455  | 0.00   | 489    | 0.03     |
| 0.540          | 110  | 0.00   | 129    | 0.01     |
| 0.627          | 304  | 0.00   | 173    | 0.01     |
| 0.720          | 355  | 0.00   | 181    | 0.01     |



Area % Report

Data File: C:\EZChrom Elite\Enterprise\Projects\Nick Lawrence\Data\Roberta\RPM1499 MeOH 40% TFA 0.1 in H2O 60% 1ml 20 min TEMPL.met 12-1-2009 2:44:17 PM.dat  
 Method: C:\EZChrom Elite\Enterprise\Projects\Nick Lawrence\Method\Roberta\MeOH 40% TFA 0.1 in H2O 60% 1ml 20 min TEMPL.met  
 Acquired: 12/1/2009 2:46:34 PM  
 Printed: 12/1/2009 4:02:12 PM

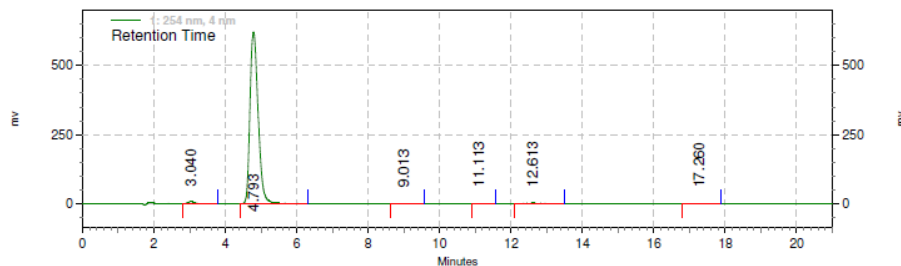

1: 254 nm, 4 nm

Results

| Retention Time | Area    | Area % | Height | Height % |
|----------------|---------|--------|--------|----------|
| 3.040          | 107454  | 1.06   | 7796   | 1.23     |
| 4.793          | 9886770 | 97.75  | 620447 | 98.18    |
| 9.013          | 14870   | 0.15   | 541    | 0.09     |
| 11.113         | 4046    | 0.04   | 192    | 0.03     |
| 12.613         | 93501   | 0.92   | 2777   | 0.44     |
| 17.260         | 7529    | 0.07   | 196    | 0.03     |

| Totals | Area     | Area % | Height | Height % |
|--------|----------|--------|--------|----------|
|        | 10114170 | 100.00 | 631949 | 100.00   |

Spectrum Max

Plot Results

| Retention Time | Area | Area % | Height | Height % |
|----------------|------|--------|--------|----------|
| 0.200          | 229  | 0.00   | 368    | 0.03     |
| 0.340          | 1025 | 0.01   | 317    | 0.02     |
| 0.453          | 616  | 0.00   | 387    | 0.03     |
| 0.513          | 304  | 0.00   | 300    | 0.02     |
| 0.593          | 380  | 0.00   | 428    | 0.03     |
| 0.667          | 566  | 0.00   | 21     | 0.00     |
| 0.740          | 1249 | 0.01   | 615    | 0.05     |
| 0.960          | 458  | 0.00   | 377    | 0.03     |
| 1.027          | 230  | 0.00   | 301    | 0.02     |
| 1.087          | 698  | 0.00   | 703    | 0.06     |
| 1.153          | 390  | 0.00   | 539    | 0.04     |

# HPLC trace1 of 5k

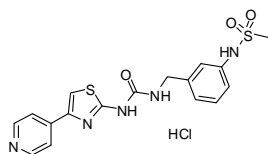

## Area % Report

Data File: C:\EZChrom Elite\Enterprise\Projects\Nick Lawrence\Data\Roberta\RPM1490 MeOH 40% TFA 0.1 in H2O 60% 1ml 20 min TEMPL.met 12-1-2009 12:42:33 PM.dat  
 Method: C:\EZChrom Elite\Enterprise\Projects\Nick Lawrence\Method\Roberta\MeOH 40% TFA 0.1 in H2O 60% 1ml 20 min TEMPL.met  
 Acquired: 12/1/2009 12:44:51 PM  
 Printed: 12/1/2009 1:22:05 PM

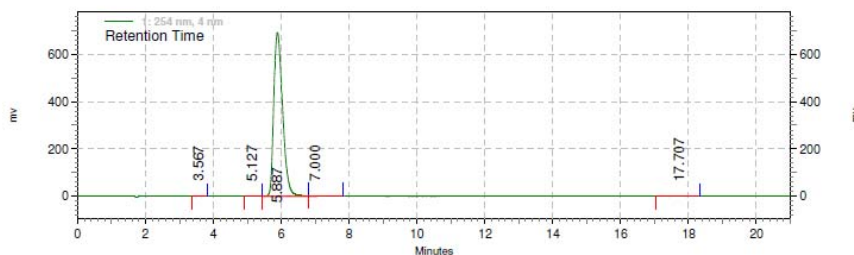

### 1: 254 nm, 4 nm

#### Results

| Retention Time | Area     | Area % | Height | Height % |
|----------------|----------|--------|--------|----------|
| 3.567          | 7252     | 0.06   | 613    | 0.09     |
| 5.127          | 26353    | 0.21   | 1785   | 0.26     |
| 5.887          | 12549519 | 99.06  | 691818 | 99.23    |
| 7.000          | 69484    | 0.55   | 2594   | 0.37     |
| 17.707         | 15665    | 0.12   | 410    | 0.06     |

| Totals | Area     | Area % | Height | Height % |
|--------|----------|--------|--------|----------|
|        | 12668273 | 100.00 | 697220 | 100.00   |

### Spectrum Max

#### Plot Results

| Retention Time | Area | Area % | Height | Height % |
|----------------|------|--------|--------|----------|
| 0.480          | 204  | 0.00   | 142    | 0.01     |
| 0.647          | 186  | 0.00   | 95     | 0.01     |
| 0.713          | 220  | 0.00   | 141    | 0.01     |
| 0.773          | 356  | 0.00   | 183    | 0.01     |
| 0.867          | 197  | 0.00   | 103    | 0.01     |
| 0.927          | 393  | 0.00   | 695    | 0.05     |
| 0.973          | 221  | 0.00   | 107    | 0.01     |
| 1.040          | 213  | 0.00   | 184    | 0.01     |
| 1.080          | 186  | 0.00   | 118    | 0.01     |
| 1.233          | 425  | 0.00   | 186    | 0.01     |
| 1.353          | 774  | 0.00   | 536    | 0.04     |
| 1.427          | 549  | 0.00   | 143    | 0.01     |

Area % Report

Data File: C:\EZChrom Elite\Enterprise\Projects\Nick Lawrence\Data\Roberta\RPM1490 CH3CN 20%  
 TFA 0.1 in H2O 80% 1ml 20 min TEMP.met 12-3-2009 10-56-25 AM  
 Method: C:\EZChrom Elite\Enterprise\Projects\Nick Lawrence\Method\Roberta\CH3CN 20% TFA 0.1 in  
 H2O 80% 1ml 20 min TEMP.met  
 Acquired: 12/3/2009 10:57:56 AM  
 Printed: 12/3/2009 11:41:14 AM

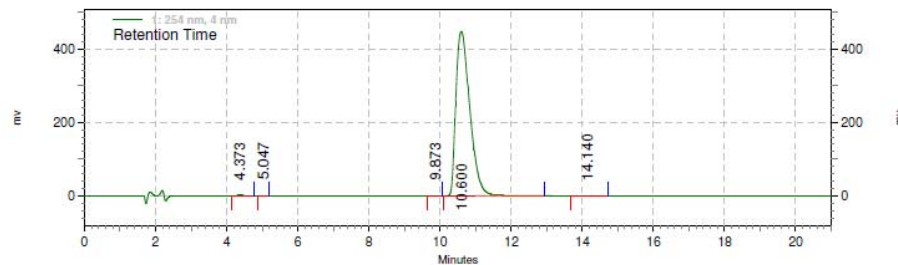

1: 254 nm, 4 nm  
 Results

| Retention Time | Area     | Area % | Height | Height % |
|----------------|----------|--------|--------|----------|
| 4.373          | 30737    | 0.25   | 2859   | 0.63     |
| 5.047          | 5454     | 0.04   | 564    | 0.12     |
| 9.873          | 2401     | 0.02   | 173    | 0.04     |
| 10.600         | 12224471 | 99.48  | 447924 | 99.01    |
| 14.140         | 25413    | 0.21   | 900    | 0.20     |

| Totals |          |        |        |        |
|--------|----------|--------|--------|--------|
|        | 12288476 | 100.00 | 452420 | 100.00 |

Spectrum Max  
 Plot Results

| Retention Time | Area | Area % | Height | Height % |
|----------------|------|--------|--------|----------|
| 0.107          | 591  | 0.00   | 237    | 0.01     |
| 0.187          | 216  | 0.00   | 113    | 0.01     |
| 0.327          | 1119 | 0.00   | 231    | 0.01     |
| 0.447          | 1260 | 0.00   | 232    | 0.01     |
| 0.680          | 3258 | 0.01   | 517    | 0.03     |
| 0.840          | 1740 | 0.01   | 445    | 0.03     |
| 0.920          | 1665 | 0.01   | 316    | 0.02     |
| 1.027          | 628  | 0.00   | 317    | 0.02     |
| 1.107          | 2592 | 0.01   | 446    | 0.03     |
| 1.193          | 980  | 0.00   | 336    | 0.02     |
| 1.260          | 1760 | 0.01   | 763    | 0.05     |
| 1.340          | 2348 | 0.01   | 490    | 0.03     |

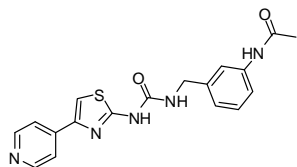

**Area % Report**

Data File: C:\EZChrom Elite\Enterprise\Projects\Nick Lawrence\Data\Roberta\RPM1492 MeOH 40% TFA 0.1 in H2O 60% 1ml 20 min TEMPL.met 12-1-2009 1-31-22 PM.dat  
 Method: C:\EZChrom Elite\Enterprise\Projects\Nick Lawrence\Method\Roberta\MeOH 40% TFA 0.1 in H2O 60% 1ml 20 min TEMPL.met  
 Acquired: 12/1/2009 1:33:40 PM  
 Printed: 12/1/2009 2:03:06 PM

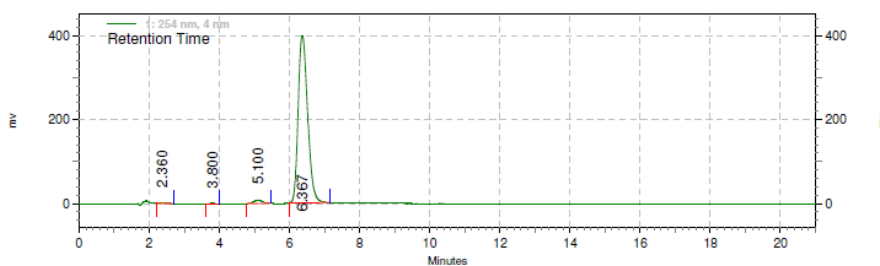

**1: 254 nm, 4 nm  
Results**

| Retention Time | Area    | Area % | Height | Height % |
|----------------|---------|--------|--------|----------|
| 2.360          | 23528   | 0.31   | 1923   | 0.47     |
| 3.800          | 2673    | 0.03   | 239    | 0.06     |
| 5.100          | 126131  | 1.65   | 7653   | 1.87     |
| 6.367          | 7489016 | 98.01  | 398880 | 97.60    |

| Totals | Area    | Area % | Height | Height % |
|--------|---------|--------|--------|----------|
|        | 7641348 | 100.00 | 408695 | 100.00   |

**Spectrum Max  
Plot Results**

| Retention Time | Area   | Area % | Height | Height % |
|----------------|--------|--------|--------|----------|
| 0.293          | 247    | 0.00   | 232    | 0.03     |
| 0.393          | 394    | 0.00   | 150    | 0.02     |
| 0.580          | 590    | 0.01   | 103    | 0.02     |
| 0.753          | 304    | 0.00   | 52     | 0.01     |
| 0.847          | 793    | 0.01   | 0      | 0.00     |
| 1.067          | 96     | 0.00   | 89     | 0.01     |
| 1.107          | 361    | 0.00   | 387    | 0.06     |
| 1.247          | 489    | 0.00   | 195    | 0.03     |
| 1.433          | 749    | 0.01   | 166    | 0.02     |
| 1.620          | 549    | 0.00   | 116    | 0.02     |
| 1.760          | 606072 | 5.46   | 89287  | 13.18    |
| 2.347          | 31199  | 0.28   | 2235   | 0.33     |
| 2.887          | 1601   | 0.01   | 367    | 0.05     |

Area % Report

Data File: C:\EZChrom Elite\Enterprise\Projects\Nick Lawrence\Data\Roberta\RPM1492 CH3CN 20%  
 TFA 0.1 in H2O 80% 1ml 20 min TEMP.met 12-3-2009 11-41-38 AM  
 Method: C:\EZChrom Elite\Enterprise\Projects\Nick Lawrence\Method\Roberta\CH3CN 20% TFA 0.1 in  
 H2O 80% 1ml 20 min TEMP.met  
 Acquired: 12/3/2009 11:43:09 AM  
 Printed: 12/3/2009 12:33:09 PM

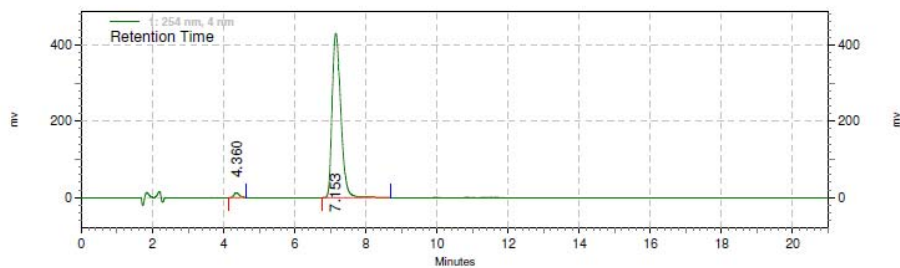

1: 254 nm, 4 nm

Results

| Retention Time | Area    | Area % | Height | Height % |
|----------------|---------|--------|--------|----------|
| 4.360          | 121059  | 1.64   | 11732  | 2.65     |
| 7.153          | 7276752 | 98.36  | 430165 | 97.35    |

| Totals |         |        |        |        |
|--------|---------|--------|--------|--------|
|        | 7397811 | 100.00 | 441897 | 100.00 |

Spectrum Max Plot Results

| Retention Time | Area    | Area % | Height | Height % |
|----------------|---------|--------|--------|----------|
| 0.160          | 232     | 0.00   | 466    | 0.03     |
| 0.393          | 1444    | 0.01   | 360    | 0.03     |
| 0.467          | 279     | 0.00   | 433    | 0.03     |
| 0.533          | 658     | 0.00   | 370    | 0.03     |
| 0.620          | 546     | 0.00   | 357    | 0.03     |
| 0.707          | 793     | 0.01   | 268    | 0.02     |
| 0.800          | 761     | 0.01   | 59     | 0.00     |
| 0.967          | 1517    | 0.01   | 606    | 0.04     |
| 1.047          | 891     | 0.01   | 457    | 0.03     |
| 1.087          | 526     | 0.00   | 311    | 0.02     |
| 1.233          | 1524    | 0.01   | 619    | 0.05     |
| 1.300          | 1919    | 0.01   | 689    | 0.05     |
| 1.453          | 3130    | 0.02   | 631    | 0.05     |
| 1.747          | 1581069 | 11.27  | 280648 | 20.77    |
| 2.207          | 2270825 | 16.19  | 387348 | 28.67    |

HPLC trace of **5m**

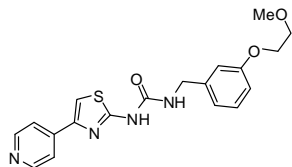

Area % Report

Data File: C:\EZChrom Elite\Enterprise\Projects\Nick Lawrence\Data\Roberta\RPM1445 MeOH 40% TFA  
 0.1 in H2O 60% 1ml 20 min TEMPL.met 6-8-2010 6-49-42 PM  
 Method: C:\EZChrom Elite\Enterprise\Projects\Nick Lawrence\Method\Roberta\MeOH 50% H2O 50%  
 1ml 20 min TEMPL.met  
 Acquired: 6/8/2010 6:51:09 PM  
 Printed: 6/10/2010 2:36:22 PM

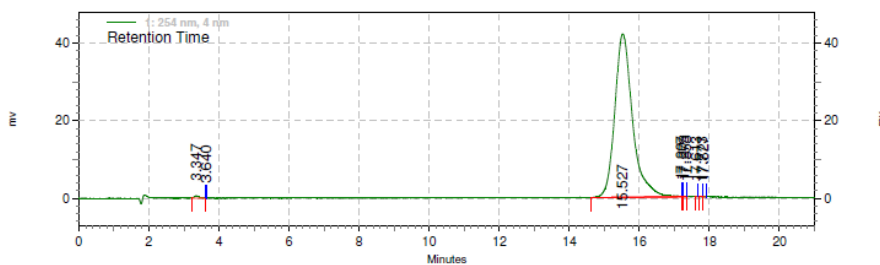

1: 254 nm, 4 nm  
 Results

| Retention Time | Area           | Area %        | Height       | Height %      |
|----------------|----------------|---------------|--------------|---------------|
| 3.347          | 5412           | 0.36          | 588          | 1.36          |
| 3.640          | 99             | 0.01          | 48           | 0.11          |
| 15.527         | 1482080        | 99.57         | 42124        | 97.78         |
| 17.207         | 184            | 0.01          | 88           | 0.20          |
| 17.273         | 253            | 0.02          | 69           | 0.16          |
| 17.353         | 29             | 0.00          | 45           | 0.10          |
| 17.613         | 67             | 0.00          | 25           | 0.06          |
| 17.773         | 160            | 0.01          | 44           | 0.10          |
| 17.827         | 236            | 0.02          | 49           | 0.11          |
| <b>Totals</b>  | <b>1488520</b> | <b>100.00</b> | <b>43080</b> | <b>100.00</b> |

Spectrum Max  
 Plot Results

| Retention Time | Area | Area % | Height | Height % |
|----------------|------|--------|--------|----------|
| 0.120          | 700  | 0.02   | 554    | 0.21     |
| 0.220          | 523  | 0.01   | 479    | 0.18     |
| 0.260          | 187  | 0.01   | 185    | 0.07     |
| 0.487          | 750  | 0.02   | 344    | 0.13     |
| 0.593          | 629  | 0.02   | 286    | 0.11     |
| 0.647          | 627  | 0.02   | 506    | 0.19     |
| 0.753          | 1048 | 0.03   | 490    | 0.19     |
| 0.900          | 885  | 0.02   | 517    | 0.20     |

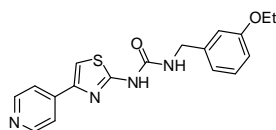

Area % Report

Data File: C:\EZChrom Elite\Enterprise\Projects\Nick Lawrence\Data\Roberta\RPM1461 MeOH 50% TFA 0.1 in H2O 50% 1ml 20 min TEMPL.met 10-1-2009 4-34-58 AM  
 Method: C:\EZChrom Elite\Enterprise\Projects\Nick Lawrence\Method\Roberta\MeOH 50% TFA 0.1 in H2O 50% 1ml 20 min TEMPL.met  
 Acquired: 10/1/2009 4:36:27 AM  
 Printed: 10/1/2009 10:00:18 AM

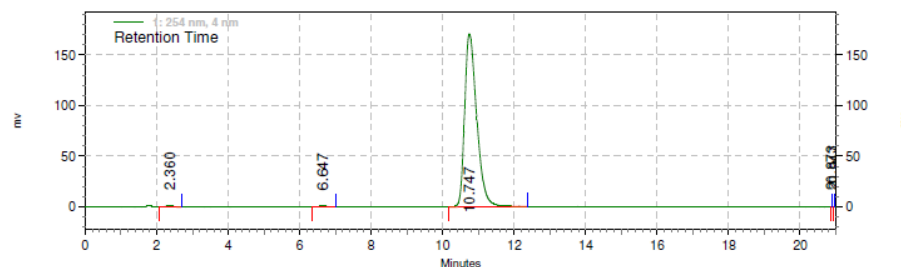

1: 254 nm, 4 nm  
 Results

| Retention Time | Area    | Area % | Height | Height % |
|----------------|---------|--------|--------|----------|
| 2.360          | 17365   | 0.43   | 1529   | 0.88     |
| 6.647          | 15695   | 0.39   | 983    | 0.57     |
| 10.747         | 4014400 | 99.18  | 170751 | 98.51    |
| 20.873         | 59      | 0.00   | 27     | 0.02     |
| 20.947         | 69      | 0.00   | 46     | 0.03     |

| Totals |         |        |        |        |
|--------|---------|--------|--------|--------|
|        | 4047588 | 100.00 | 173336 | 100.00 |

Spectrum Max  
 Plot Results

| Retention Time | Area | Area % | Height | Height % |
|----------------|------|--------|--------|----------|
| 0.207          | 448  | 0.01   | 842    | 0.16     |
| 0.300          | 389  | 0.00   | 335    | 0.06     |
| 0.353          | 494  | 0.01   | 192    | 0.04     |
| 0.433          | 229  | 0.00   | 182    | 0.03     |
| 0.533          | 458  | 0.01   | 248    | 0.05     |
| 0.580          | 616  | 0.01   | 0      | 0.00     |
| 0.693          | 158  | 0.00   | 299    | 0.06     |
| 0.907          | 504  | 0.01   | 365    | 0.07     |
| 0.967          | 172  | 0.00   | 210    | 0.04     |
| 1.013          | 187  | 0.00   | 263    | 0.05     |
| 1.073          | 189  | 0.00   | 87     | 0.02     |
| 1.133          | 419  | 0.00   | 590    | 0.11     |

Area % Report

Data File: C:\EZChrom Elite\Enterprise\Projects\Nick Lawrence\Data\Roberta\RPM1461 CH3CN 30%  
 TFA 0.1 in H2O 70% 1ml 20 min TEMP.met 9-30-2009 2-03-18 PM  
 Method: C:\EZChrom Elite\Enterprise\Projects\Nick Lawrence\Method\Roberta\CH3CN 30% TFA 0.1 in  
 H2O 70% 1ml 20 min TEMP.met  
 Acquired: 9/30/2009 2:04:49 PM  
 Printed: 10/1/2009 10:51:38 AM

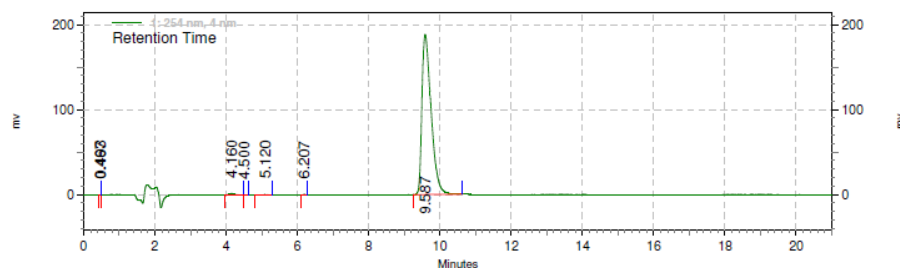

1: 254 nm, 4 nm  
 Results

| Retention Time | Area           | Area %        | Height        | Height %      |
|----------------|----------------|---------------|---------------|---------------|
| 0.467          | 105            | 0.00          | 50            | 0.03          |
| 0.493          | 0              | 0.00          | 0             | 0.00          |
| 4.160          | 14759          | 0.44          | 1628          | 0.86          |
| 4.500          | 132            | 0.00          | 32            | 0.02          |
| 5.120          | 2122           | 0.06          | 165           | 0.09          |
| 6.207          | 515            | 0.02          | 88            | 0.05          |
| 9.587          | 3372352        | 99.48         | 188225        | 98.97         |
| <b>Totals</b>  | <b>3389985</b> | <b>100.00</b> | <b>190188</b> | <b>100.00</b> |

Spectrum Max  
 Plot Results

| Retention Time | Area  | Area % | Height | Height % |
|----------------|-------|--------|--------|----------|
| 0.113          | 747   | 0.01   | 662    | 0.07     |
| 0.180          | 5010  | 0.04   | 707    | 0.07     |
| 0.353          | 5037  | 0.04   | 1658   | 0.17     |
| 0.407          | 6348  | 0.05   | 1626   | 0.17     |
| 0.480          | 5060  | 0.04   | 1781   | 0.18     |
| 0.553          | 7174  | 0.06   | 1955   | 0.20     |
| 0.587          | 27193 | 0.23   | 2451   | 0.25     |
| 0.767          | 15459 | 0.13   | 3183   | 0.33     |
| 0.927          | 41995 | 0.36   | 3787   | 0.39     |
| 1.187          | 50460 | 0.43   | 5048   | 0.52     |



HPLC trace1 of 5o

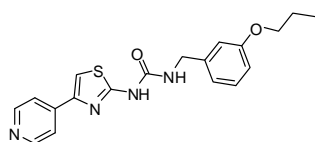

Area % Report

Data File: C:\EZChrom Elite\Enterprise\Projects\Nick Lawrence\Data\Roberta\RPM1462 CH3CN 40% TFA 0.1 in H2O 60% 1ml 20 min TEMPL.met 9-30-2009 10:30-57 AM.dat  
 Method: C:\EZChrom Elite\Enterprise\Projects\Nick Lawrence\Method\Roberta\CH3CN 40% TFA 0.1 in H2O 60% 1ml 20 min TEMPL.met  
 Acquired: 9/30/2009 10:33:14 AM  
 Printed: 9/30/2009 11:18:44 AM

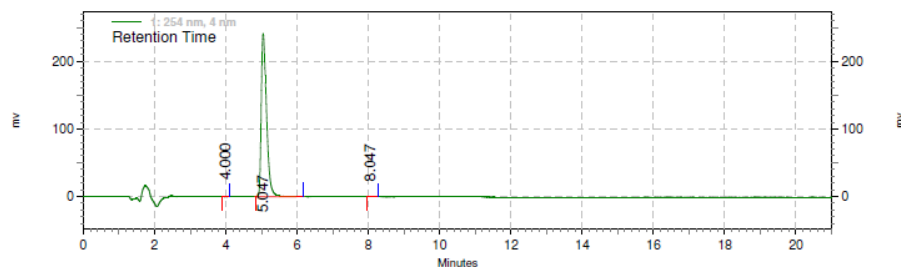

1: 254 nm, 4 nm  
Results

| Retention Time | Area    | Area % | Height | Height % |
|----------------|---------|--------|--------|----------|
| 4.000          | 831     | 0.03   | 119    | 0.05     |
| 5.047          | 2502653 | 99.94  | 241375 | 99.92    |
| 8.047          | 763     | 0.03   | 81     | 0.03     |

| Totals | Area    | Area % | Height | Height % |
|--------|---------|--------|--------|----------|
|        | 2504247 | 100.00 | 241575 | 100.00   |

Spectrum Max  
Plot Results

| Retention Time | Area    | Area % | Height | Height % |
|----------------|---------|--------|--------|----------|
| 0.187          | 50      | 0.00   | 0      | 0.00     |
| 0.240          | 982     | 0.01   | 403    | 0.04     |
| 0.320          | 1794    | 0.02   | 408    | 0.04     |
| 0.407          | 2653    | 0.02   | 760    | 0.07     |
| 0.447          | 4558    | 0.04   | 733    | 0.07     |
| 0.640          | 10172   | 0.09   | 1475   | 0.14     |
| 0.747          | 19490   | 0.18   | 2045   | 0.19     |
| 0.947          | 32121   | 0.30   | 2694   | 0.25     |
| 1.140          | 16580   | 0.15   | 2793   | 0.26     |
| 1.207          | 11081   | 0.10   | 2758   | 0.26     |
| 1.440          | 323838  | 3.02   | 39618  | 3.70     |
| 1.520          | 175175  | 1.63   | 53414  | 4.99     |
| 1.740          | 192668  | 1.80   | 20589  | 1.92     |
| 1.960          | 4607674 | 42.99  | 398421 | 37.19    |

**Area % Report**

Data File: C:\EZChrom Elite\Enterprise\Projects\Nick Lawrence\Data\Roberta\RPM1462 MeOH 60% TFA  
 0.1 in H2O 40% 1ml 20 min TEMPL.met 10-1-2009 11-23-33 AM.dat  
 Method: C:\EZChrom Elite\Enterprise\Projects\Nick Lawrence\Method\Roberta\MeOH 60% TFA 0.1 in  
 H2O 40% 1ml 20 min TEMPL.met  
 Acquired: 10/1/2009 11:25:50 AM  
 Printed: 10/1/2009 1:04:34 PM

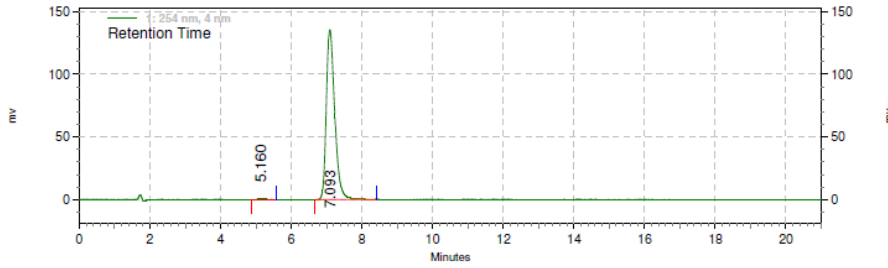

**1: 254 nm, 4 nm  
Results**

| Retention Time | Area    | Area %         | Height        | Height %      |               |
|----------------|---------|----------------|---------------|---------------|---------------|
| 5.160          | 14567   | 0.64           | 954           | 0.70          |               |
| 7.093          | 2251309 | 99.36          | 135430        | 99.30         |               |
| <b>Totals</b>  |         | <b>2265876</b> | <b>100.00</b> | <b>136384</b> | <b>100.00</b> |

**Spectrum Max  
Plot Results**

| Retention Time | Area | Area % | Height | Height % |
|----------------|------|--------|--------|----------|
| 0.093          | 670  | 0.01   | 398    | 0.09     |
| 0.180          | 440  | 0.01   | 456    | 0.11     |
| 0.353          | 1128 | 0.02   | 410    | 0.09     |
| 0.560          | 3228 | 0.07   | 599    | 0.14     |
| 0.647          | 1340 | 0.03   | 1090   | 0.25     |
| 0.687          | 965  | 0.02   | 684    | 0.16     |
| 0.787          | 3413 | 0.07   | 1011   | 0.23     |
| 0.820          | 3414 | 0.07   | 862    | 0.20     |
| 0.967          | 4543 | 0.09   | 1092   | 0.25     |
| 1.087          | 3899 | 0.08   | 1301   | 0.30     |
| 1.153          | 3709 | 0.07   | 1274   | 0.29     |
| 1.227          | 1933 | 0.04   | 1076   | 0.25     |
| 1.293          | 3935 | 0.08   | 1547   | 0.36     |
| 1.340          | 2957 | 0.06   | 1204   | 0.28     |
| 1.433          | 5080 | 0.10   | 1095   | 0.25     |

# HPLC trace1 of 5p

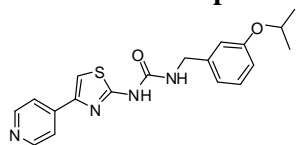

## Area % Report

Data File: C:\EZChrom Elite\Enterprise\Projects\Nick Lawrence\Data\Roberta\RPM1454 CH3CN 30%  
 TFA 0.1 in H2O 70% 1ml 20 min TEMP.met 9-30-2009 2-48-30 PM  
 Method: C:\EZChrom Elite\Enterprise\Projects\Nick Lawrence\Method\Roberta\CH3CN 30% TFA 0.1 in  
 H2O 70% 1ml 20 min TEMP.met  
 Acquired: 9/30/2009 2:49:59 PM  
 Printed: 10/1/2009 10:54:15 AM

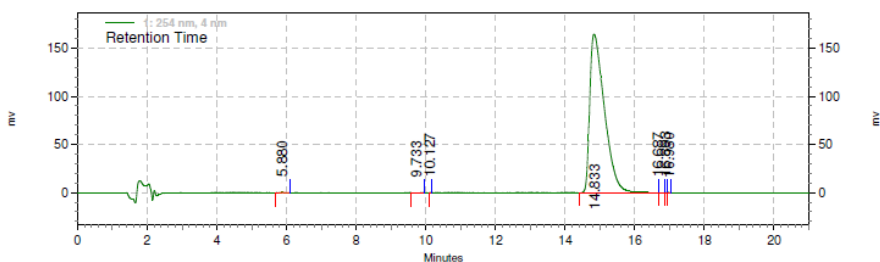

### 1: 254 nm, 4 nm Results

| Retention Time | Area           | Area %        | Height        | Height %      |
|----------------|----------------|---------------|---------------|---------------|
| 5.880          | 5094           | 0.11          | 500           | 0.30          |
| 9.733          | 1627           | 0.03          | 123           | 0.07          |
| 10.127         | 111            | 0.00          | 50            | 0.03          |
| 14.833         | 4821017        | 99.83         | 164629        | 99.43         |
| 16.687         | 1112           | 0.02          | 143           | 0.09          |
| 16.893         | 200            | 0.00          | 77            | 0.05          |
| 16.980         | 138            | 0.00          | 49            | 0.03          |
| <b>Totals</b>  | <b>4829299</b> | <b>100.00</b> | <b>165571</b> | <b>100.00</b> |

### Spectrum Max Plot Results

| Retention Time | Area | Area % | Height | Height % |
|----------------|------|--------|--------|----------|
| 0.060          | 393  | 0.00   | 553    | 0.06     |
| 0.180          | 210  | 0.00   | 173    | 0.02     |
| 0.233          | 120  | 0.00   | 67     | 0.01     |
| 0.280          | 118  | 0.00   | 192    | 0.02     |
| 0.340          | 383  | 0.00   | 380    | 0.04     |
| 0.493          | 612  | 0.00   | 232    | 0.02     |
| 0.640          | 620  | 0.00   | 424    | 0.05     |
| 0.793          | 838  | 0.01   | 486    | 0.05     |
| 0.853          | 302  | 0.00   | 145    | 0.02     |
| 0.960          | 825  | 0.01   | 275    | 0.03     |

Area % Report

Data File: CAEZChrom Elite\Enterprise\Projects\Nick Lawrence\Data\Roberta\RPM1454 MeOH 50% TFA  
 0.1 in H2O 50% 1ml 20 min TEMPL.met 10-1-2009 5-20-09 AM  
 Method: CAEZChrom Elite\Enterprise\Projects\Nick Lawrence\Method\Roberta\MeOH 50% TFA 0.1 in  
 H2O 50% 1ml 20 min TEMPL.met  
 Acquired: 10/1/2009 5:21:38 AM  
 Printed: 10/1/2009 10:01:44 AM

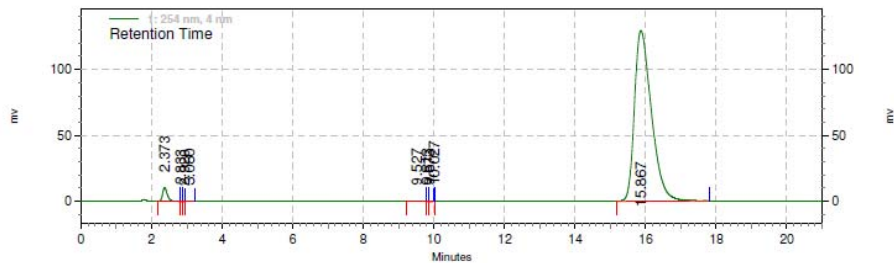

I: 254 nm, 4 nm  
 Results

| Retention Time | Area    | Area % | Height | Height % |
|----------------|---------|--------|--------|----------|
| 2.373          | 95348   | 2.16   | 10267  | 7.31     |
| 2.833          | 182     | 0.00   | 52     | 0.04     |
| 2.920          | 95      | 0.00   | 45     | 0.03     |
| 3.080          | 742     | 0.02   | 90     | 0.06     |
| 9.527          | 4485    | 0.10   | 234    | 0.17     |
| 9.813          | 273     | 0.01   | 70     | 0.05     |
| 9.873          | 213     | 0.00   | 51     | 0.04     |
| 10.027         | 5       | 0.00   | 14     | 0.01     |
| 15.867         | 4321372 | 97.71  | 129591 | 92.29    |
| Totals         | 4422715 | 100.00 | 140414 | 100.00   |

Spectrum Max  
 Plot Results

| Retention Time | Area | Area % | Height | Height % |
|----------------|------|--------|--------|----------|
| 0.140          | 522  | 0.01   | 293    | 0.06     |
| 0.253          | 420  | 0.00   | 244    | 0.05     |
| 0.300          | 827  | 0.01   | 522    | 0.11     |
| 0.480          | 1060 | 0.01   | 641    | 0.13     |
| 0.547          | 253  | 0.00   | 361    | 0.07     |
| 0.600          | 661  | 0.01   | 769    | 0.16     |
| 0.800          | 1150 | 0.01   | 541    | 0.11     |
| 0.873          | 636  | 0.01   | 30     | 0.01     |

HPLC trace 1 of 5q

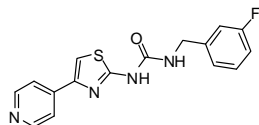

Area % Report

Data File: C:\EZChrom Elite\Enterprise\Projects\Nick Lawrence\Data\Roberta\RPM1299Batch9Feb2009  
 CH3CN 30% TFA 0.1 in H2O 70% 1ml 20 min.met 3-12-2009 9:35-08 PM  
 Method: C:\EZChrom Elite\Enterprise\Projects\Nick Lawrence\Method\Roberta\CH3CN 30% TFA 0.1 in  
 H2O 70% 1ml 20 min.met  
 Acquired: 3/12/2009 9:36:36 PM  
 Printed: 3/13/2009 10:19:16 AM

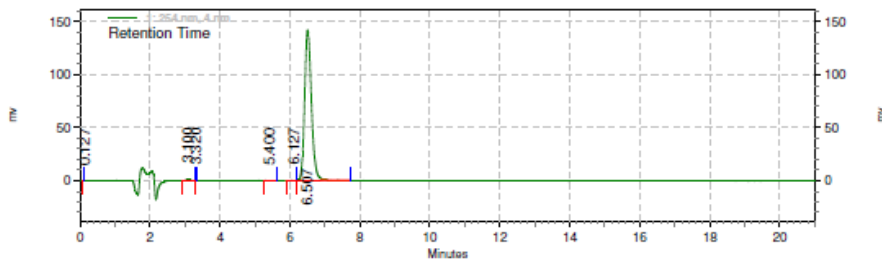

1: 254 nm, 4 nm  
 Results

| Retention Time | Area    | Area % | Height | Height % |
|----------------|---------|--------|--------|----------|
| 0.127          | 62      | 0.00   | 40     | 0.03     |
| 3.100          | 10211   | 0.53   | 1407   | 0.98     |
| 3.320          | 46      | 0.00   | 34     | 0.02     |
| 5.400          | 1292    | 0.07   | 105    | 0.07     |
| 6.127          | 3686    | 0.19   | 410    | 0.28     |
| 6.507          | 1929205 | 99.21  | 142084 | 98.61    |
| Totals         |         |        |        |          |
|                | 1944502 | 100.00 | 144080 | 100.00   |

---< General Method Parameters >---

Jasco Pumps

```

=====
Model:          PU-2086
Control mode:   Binary HPG
Solvent A:      0.1 TFA in Water
Solvent B:      CH3CN
Solvent C:      N/A
Solvent D:      N/A
Pressure range
  Min. pressure: 3.0 MPa
  Max. pressure: 50.0 MPa
    
```

Area % Report

Data File: C:\EZChrom Elite\Enterprise\Projects\Nick Lawrence\Data\Roberta\RPM1299Batch9Feb2009  
 MeOH 50 TFA 0.1 in H2O 50 1ml 20 min.met 3-10-2009 6-24-19 PM  
 Method: C:\EZChrom Elite\Enterprise\Projects\Nick Lawrence\Method\Roberta\MeOH 50% TFA 0.1 in  
 H2O 50% 1ml 20 min.met  
 Acquired: 3/10/2009 6:25:50 PM  
 Printed: 3/11/2009 9:50:49 AM

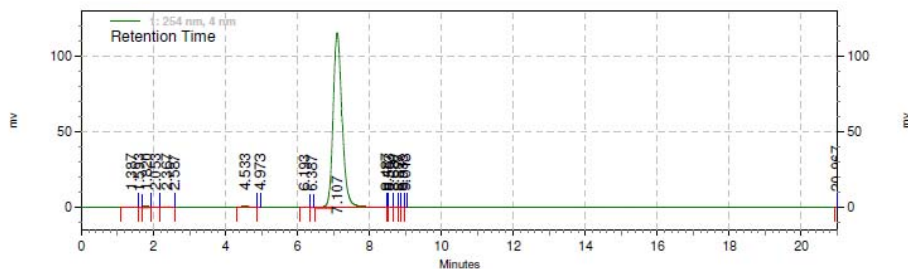

1: 254 nm, 4 nm  
 Results

| Retention Time | Area           | Area %        | Height        | Height %      |
|----------------|----------------|---------------|---------------|---------------|
| 1.387          | 3526           | 0.17          | 231           | 0.20          |
| 1.593          | 911            | 0.04          | 165           | 0.14          |
| 1.820          | 6495           | 0.32          | 705           | 0.60          |
| 2.053          | 1709           | 0.08          | 155           | 0.13          |
| 2.367          | 4109           | 0.20          | 362           | 0.31          |
| 2.587          | 3              | 0.00          | 0             | 0.00          |
| 4.533          | 10144          | 0.50          | 759           | 0.64          |
| 4.973          | 97             | 0.00          | 6             | 0.01          |
| 6.193          | 525            | 0.03          | 77            | 0.07          |
| 6.387          | 72             | 0.00          | 34            | 0.03          |
| 7.107          | 2003740        | 98.54         | 115172        | 97.43         |
| 8.487          | 295            | 0.01          | 143           | 0.12          |
| 8.553          | 796            | 0.04          | 120           | 0.10          |
| 8.680          | 553            | 0.03          | 97            | 0.08          |
| 8.827          | 168            | 0.01          | 78            | 0.07          |
| 8.933          | 94             | 0.00          | 44            | 0.04          |
| 9.013          | 55             | 0.00          | 33            | 0.03          |
| 20.967         | 80             | 0.00          | 33            | 0.03          |
| <b>Totals</b>  | <b>2033372</b> | <b>100.00</b> | <b>118214</b> | <b>100.00</b> |

-----  
 ---< General Method Parameters >-----  
 -----

HPLC trace 1 of 5t

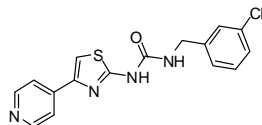

Area % Report

Data File: C:\EZChrom Elite\Enterprise\Projects\Nick Lawrence\Data\Roberta\RPM1314 CH3CN 30%  
 TFA 0.1 in H2O 70% 1ml 20 min.met 3-12-2009 7-19-31 PM  
 Method: C:\EZChrom Elite\Enterprise\Projects\Nick Lawrence\Method\Roberta\CH3CN 30% TFA 0.1 in  
 H2O 70% 1ml 20 min.met  
 Acquired: 3/12/2009 7:21:02 PM  
 Printed: 3/13/2009 10:38:09 AM

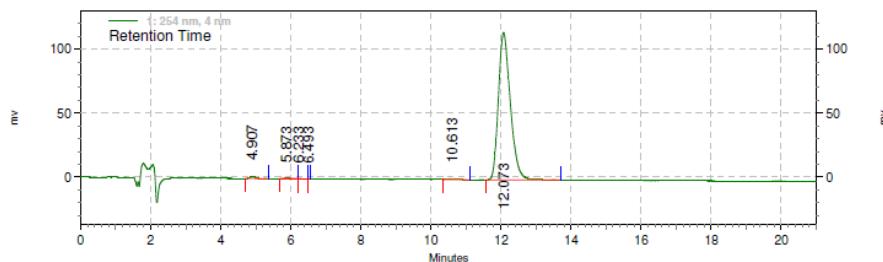

1: 254 nm, 4 nm  
 Results

| Retention Time | Area           | Area %        | Height        | Height %      |
|----------------|----------------|---------------|---------------|---------------|
| 4.907          | 14841          | 0.54          | 1394          | 1.18          |
| 5.873          | 6626           | 0.24          | 531           | 0.45          |
| 6.233          | 649            | 0.02          | 62            | 0.05          |
| 6.493          | 53             | 0.00          | 31            | 0.03          |
| 10.613         | 16504          | 0.60          | 848           | 0.72          |
| 12.073         | 2728024        | 98.60         | 115209        | 97.57         |
| <b>Totals</b>  | <b>2766697</b> | <b>100.00</b> | <b>118075</b> | <b>100.00</b> |

-----  
 ---< General Method Parameters >-----  
 -----

=====  
 Jasco Pumps

Model: PU-2086  
 Control mode: Binary HPG  
 Solvent A: 0.1 TFA in Water  
 Solvent B: CH3CN  
 Solvent C: N/A  
 Solvent D: N/A  
 Pressure range  
 Min. pressure: 3.0 MPa  
 Max. pressure: 50.0 MPa

**Area % Report**

Data File: C:\EZChrom Elite\Enterprise\Projects\Nick Lawrence\Data\Roberta\RPM1314 MeOH 50 TFA  
 0.1 in H2O 50 1ml 20 min.met 3-10-2009 12-56-41 PM.dat  
 Method: C:\EZChrom Elite\Enterprise\Projects\Nick Lawrence\Method\Roberta\MeOH 50% TFA 0.1 in  
 H2O 50% 1ml 20 min.met  
 Acquired: 3/10/2009 12:58:58 PM  
 Printed: 3/11/2009 11:07:25 AM

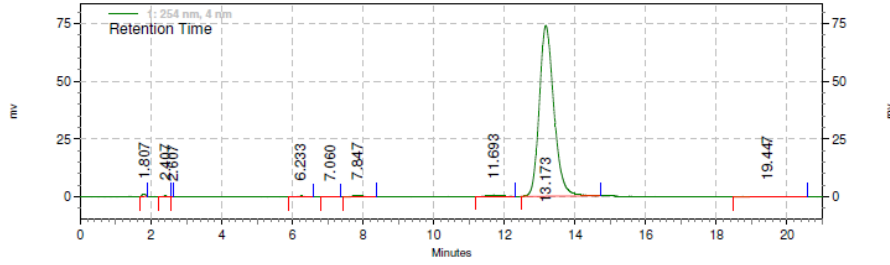

**1: 254 nm, 4 nm**

**Results**

| Retention Time | Area           | Area %        | Height       | Height %      |
|----------------|----------------|---------------|--------------|---------------|
| 1.807          | 7157           | 0.33          | 975          | 1.27          |
| 2.407          | 2616           | 0.12          | 278          | 0.36          |
| 2.607          | 68             | 0.00          | 45           | 0.06          |
| 6.233          | 5880           | 0.27          | 367          | 0.48          |
| 7.060          | 1862           | 0.09          | 111          | 0.14          |
| 7.847          | 11391          | 0.52          | 585          | 0.76          |
| 11.693         | 14594          | 0.67          | 580          | 0.75          |
| 13.173         | 2119627        | 97.43         | 73872        | 95.96         |
| 19.447         | 12443          | 0.57          | 172          | 0.22          |
| <b>Totals</b>  | <b>2175638</b> | <b>100.00</b> | <b>76985</b> | <b>100.00</b> |

---< General Method Parameters >---

Jasco Pumps

=====  
 Model: PU-2086  
 Control mode: Binary HPG  
 Solvent A: 0.1 TFA in Water  
 Solvent B: MeOH  
 Solvent C: N/A  
 Solvent D: N/A  
 Pressure range



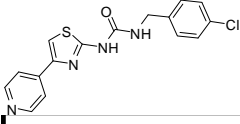

Area % Report

Data File: CAEZChrom Elite\Enterprise\Projects\Nick Lawrence\Data\Roberta\RPM1234Batvh3Sept2009  
 CH3CN 30% TFA 0.1 in H2O 70% 1ml 20 min TEMP.met 9-30-2009 3-33-42 PM.dat  
 Method: CAEZChrom Elite\Enterprise\Projects\Nick Lawrence\Method\Roberta\CH3CN 30% TFA 0.1 in  
 H2O 70% 1ml 20 min TEMP.met  
 Acquired: 9/30/2009 3:36:47 PM  
 Printed: 10/1/2009 10:48:51 AM

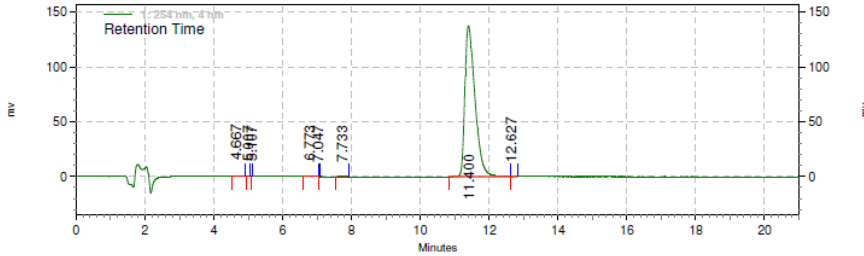

1: 254 nm, 4 nm  
 Results

| Retention Time | Area    | Area %  | Height | Height % |        |
|----------------|---------|---------|--------|----------|--------|
| 4.667          | 5589    | 0.20    | 582    | 0.42     |        |
| 5.007          | 188     | 0.01    | 54     | 0.04     |        |
| 5.107          | 50      | 0.00    | 51     | 0.04     |        |
| 6.773          | 4790    | 0.17    | 397    | 0.29     |        |
| 7.047          | 1       | 0.00    | 0      | 0.00     |        |
| 7.733          | 1928    | 0.07    | 174    | 0.13     |        |
| 11.400         | 2813928 | 99.52   | 137716 | 98.97    |        |
| 12.627         | 1142    | 0.04    | 174    | 0.13     |        |
| Totals         |         | 2827616 | 100.00 | 139148   | 100.00 |

Spectrum Max  
 Plot Results

| Retention Time | Area  | Area % | Height | Height % |
|----------------|-------|--------|--------|----------|
| 0.327          | 438   | 0.01   | 607    | 0.08     |
| 0.393          | 352   | 0.00   | 236    | 0.03     |
| 0.460          | 1039  | 0.01   | 533    | 0.07     |
| 0.527          | 416   | 0.00   | 422    | 0.06     |
| 0.607          | 1028  | 0.01   | 538    | 0.07     |
| 0.800          | 6222  | 0.07   | 990    | 0.14     |
| 0.907          | 9678  | 0.11   | 1654   | 0.23     |
| 1.027          | 17270 | 0.20   | 2405   | 0.33     |
| 1.187          | 31422 | 0.37   | 3458   | 0.48     |

Area % Report

Data File: C:\EZChrom Elite\Enterprise\Projects\Nick Lawrence\Data\Roberta\RPM1234Batch3Sept2009  
 MeOH 50% TFA 0.1 in H2O 50% 1ml 20 min TEMPL.met 10-1-2009 10-30-52 AM.dat  
 Method: C:\EZChrom Elite\Enterprise\Projects\Nick Lawrence\Method\Roberta\MeOH 50% TFA 0.1 in  
 H2O 50% 1ml 20 min TEMPL.met  
 Acquired: 10/1/2009 10:33:09 AM  
 Printed: 10/1/2009 10:56:37 AM

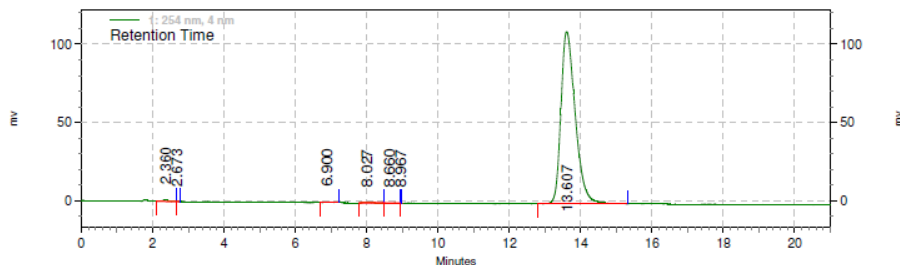

1: 254 nm, 4 nm

Results

| Retention Time | Area    | Area % | Height | Height % |
|----------------|---------|--------|--------|----------|
| 2.360          | 11772   | 0.38   | 1065   | 0.95     |
| 2.673          | 207     | 0.01   | 58     | 0.05     |
| 6.900          | 3850    | 0.12   | 261    | 0.23     |
| 8.027          | 6061    | 0.20   | 325    | 0.29     |
| 8.660          | 2176    | 0.07   | 150    | 0.13     |
| 8.967          | 80      | 0.00   | 45     | 0.04     |
| 13.607         | 3062370 | 99.22  | 109941 | 98.30    |

| Totals | Area    | Area % | Height | Height % |
|--------|---------|--------|--------|----------|
|        | 3086516 | 100.00 | 111845 | 100.00   |

Spectrum Max

Plot Results

| Retention Time | Area | Area % | Height | Height % |
|----------------|------|--------|--------|----------|
| 0.153          | 480  | 0.01   | 342    | 0.07     |
| 0.227          | 409  | 0.01   | 345    | 0.07     |
| 0.280          | 646  | 0.01   | 385    | 0.08     |
| 0.473          | 281  | 0.01   | 235    | 0.05     |
| 0.693          | 1894 | 0.03   | 758    | 0.16     |
| 0.753          | 1997 | 0.04   | 671    | 0.14     |
| 0.880          | 881  | 0.02   | 472    | 0.10     |
| 0.960          | 1389 | 0.03   | 1115   | 0.24     |
| 1.033          | 368  | 0.01   | 421    | 0.09     |
| 1.093          | 917  | 0.02   | 600    | 0.13     |

HPLC trace of 5w

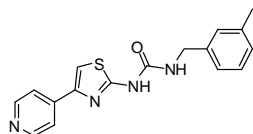

Area % Report

Data File: C:\EZChrom Elite\Enterprise\Projects\Nick Lawrence\Data\Roberta\RPM1337 MeOH 50% TFA  
 0.1 in H2O 50% 1ml 20 min.met 4-7-2009 9-19-48 PM  
 Method: C:\EZChrom Elite\Enterprise\Projects\Nick Lawrence\Method\Roberta\MeOH 50% TFA 0.1 in  
 H2O 50% 1ml 20 min.met  
 Acquired: 4/7/2009 9:21:20 PM  
 Printed: 5/6/2009 5:05:40 PM

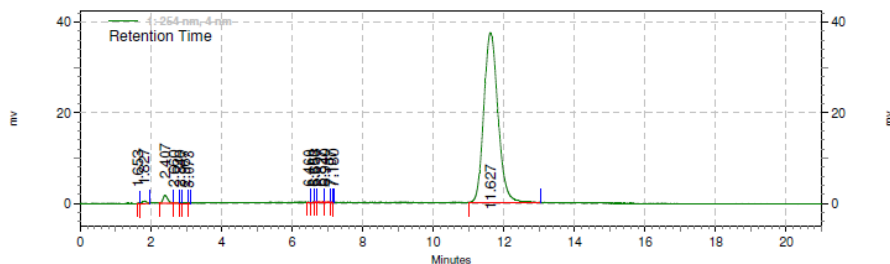

1: 254 nm, 4 nm  
 Results

| Retention Time | Area    | Area % | Height | Height % |
|----------------|---------|--------|--------|----------|
| 1.653          | 325     | 0.03   | 116    | 0.29     |
| 1.827          | 4756    | 0.45   | 596    | 1.47     |
| 2.407          | 16132   | 1.51   | 1768   | 4.35     |
| 2.660          | 501     | 0.05   | 75     | 0.18     |
| 2.840          | 130     | 0.01   | 72     | 0.18     |
| 2.967          | 522     | 0.05   | 74     | 0.18     |
| 3.073          | 156     | 0.01   | 72     | 0.18     |
| 6.460          | 95      | 0.01   | 32     | 0.08     |
| 6.600          | 121     | 0.01   | 40     | 0.10     |
| 6.653          | 130     | 0.01   | 46     | 0.11     |
| 6.827          | 674     | 0.06   | 77     | 0.19     |
| 6.940          | 519     | 0.05   | 82     | 0.20     |
| 7.107          | 149     | 0.01   | 50     | 0.12     |
| 7.180          | 38      | 0.00   | 24     | 0.06     |
| 11.627         | 1044117 | 97.73  | 37481  | 92.31    |

|        |         |        |       |        |
|--------|---------|--------|-------|--------|
| Totals | 1068365 | 100.00 | 40605 | 100.00 |
|--------|---------|--------|-------|--------|

-----  
 ---< General Method Parameters >-----  
 -----

Jasco Pumps

=====

Model: PU-2086

# HPLC trace of Compound 5x

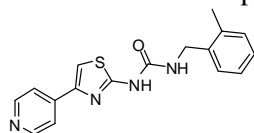

## Area % Report

Data File: C:\EZChrom Elite\Enterprise\Projects\Nick Lawrence\Data\Roberta\RPM1452MeOH 50% TFA  
 0.1 in H2O 50% 1ml 20 min TEMPL.met7-30-2011 9-11-37 PM  
 Method: C:\EZChrom Elite\Enterprise\Projects\Nick Lawrence\Method\Harsukh\New-GLEPP HPLC  
 Method 0.1%H2O 0.07%CH3CN (100-0 %) 2ml 20 min 290 nm.met  
 Acquired: 7/30/2011 9:13:08 PM  
 Printed: 8/1/2011 9:41:29 AM

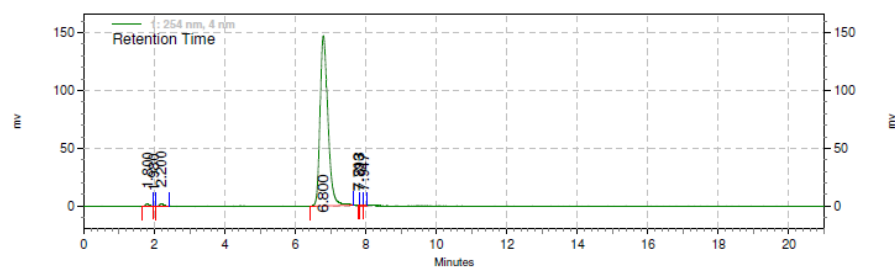

### 1: 254 nm, 4 nm Results

| Retention Time | Area           | Area %        | Height        | Height %      |
|----------------|----------------|---------------|---------------|---------------|
| 1.800          | 15324          | 0.66          | 2157          | 1.41          |
| 1.980          | 517            | 0.02          | 260           | 0.17          |
| 2.200          | 18606          | 0.80          | 2306          | 1.51          |
| 6.800          | 2276594        | 98.38         | 147028        | 96.24         |
| 7.793          | 531            | 0.02          | 397           | 0.26          |
| 7.813          | 1594           | 0.07          | 380           | 0.25          |
| 7.947          | 936            | 0.04          | 246           | 0.16          |
| <b>Totals</b>  | <b>2314102</b> | <b>100.00</b> | <b>152774</b> | <b>100.00</b> |

### Spectrum Max Plot Results

| Retention Time | Area | Area % | Height | Height % |
|----------------|------|--------|--------|----------|
| 0.140          | 708  | 0.02   | 351    | 0.08     |
| 0.293          | 932  | 0.02   | 332    | 0.07     |
| 0.360          | 418  | 0.01   | 214    | 0.05     |
| 0.413          | 546  | 0.01   | 157    | 0.03     |
| 0.480          | 150  | 0.00   | 175    | 0.04     |
| 0.573          | 657  | 0.02   | 263    | 0.06     |
| 0.653          | 855  | 0.02   | 1333   | 0.29     |
| 0.687          | 354  | 0.01   | 395    | 0.08     |
| 0.820          | 2059 | 0.05   | 1247   | 0.27     |
| 0.867          | 771  | 0.02   | 376    | 0.08     |

# HPLC trace of Compound 5y

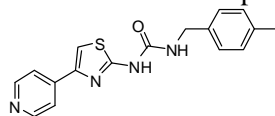

## Area % Report

Data File: C:\EZChrom Elite\Enterprise\Projects\Nick Lawrence\Data\Roberta\RPM1338 MeOH 50% TFA  
 0.1 in H2O 50% 1ml 20 min.met 4-7-2009 8-34-34 PM  
 Method: C:\EZChrom Elite\Enterprise\Projects\Nick Lawrence\Method\Roberta\MeOH 50% TFA 0.1 in  
 H2O 50% 1ml 20 min.met  
 Acquired: 4/7/2009 8:36:06 PM  
 Printed: 5/6/2009 5:09:30 PM

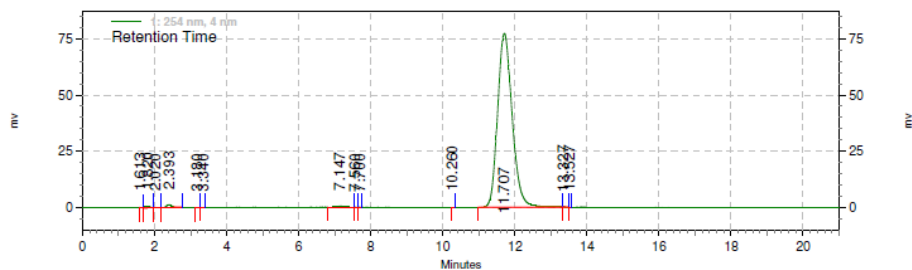

### 1: 254 nm, 4 nm Results

| Retention Time | Area    | Area % | Height | Height % |
|----------------|---------|--------|--------|----------|
| 1.613          | 354     | 0.02   | 66     | 0.08     |
| 1.820          | 6059    | 0.27   | 679    | 0.84     |
| 2.020          | 1375    | 0.06   | 134    | 0.17     |
| 2.393          | 13762   | 0.62   | 1340   | 1.67     |
| 3.180          | 209     | 0.01   | 48     | 0.06     |
| 3.340          | 247     | 0.01   | 65     | 0.08     |
| 7.147          | 10882   | 0.49   | 543    | 0.67     |
| 7.560          | 290     | 0.01   | 60     | 0.07     |
| 7.700          | 166     | 0.01   | 54     | 0.07     |
| 10.260         | 90      | 0.00   | 38     | 0.05     |
| 11.707         | 2170977 | 98.46  | 77314  | 96.09    |
| 13.327         | 541     | 0.02   | 89     | 0.11     |
| 13.527         | 71      | 0.00   | 33     | 0.04     |

| Totals | Area    | Area % | Height | Height % |
|--------|---------|--------|--------|----------|
|        | 2205023 | 100.00 | 80463  | 100.00   |

### -----< General Method Parameters >-----

#### Jasco Pumps

=====  
 Model: PU-2086  
 Control mode: Binary HPG  
 Solvent A: 0.1 TFA in Water

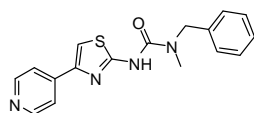

**Area % Report**

Data File: C:\EZChrom Elite\Enterprise\Projects\Nick Lawrence\Data\Roberta\RPM1330 MeOH 50 TFA  
 0.1 in H2O 50 1ml 20 min.met 3-11-2009 2:41-24 AM  
 Method: C:\EZChrom Elite\Enterprise\Projects\Nick Lawrence\Method\Roberta\MeOH 50% TFA 0.1 in  
 H2O 50% 1ml 20 min.met  
 Acquired: 3/11/2009 2:42:54 AM  
 Printed: 3/11/2009 10:11:25 AM

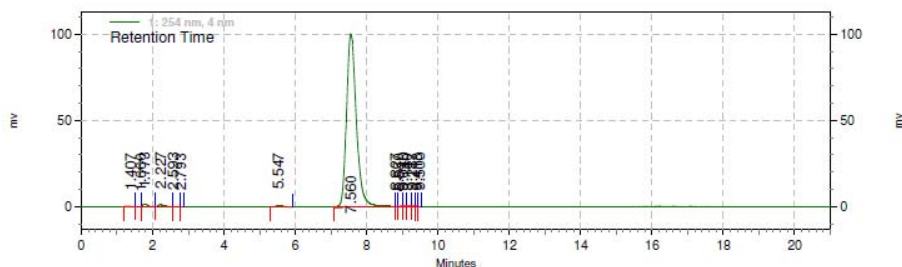

**1: 254 nm, 4 nm**

**Results**

| Retention Time | Area           | Area %        | Height        | Height %      |
|----------------|----------------|---------------|---------------|---------------|
| 1.407          | 1439           | 0.07          | 126           | 0.12          |
| 1.660          | 581            | 0.03          | 93            | 0.09          |
| 1.773          | 14019          | 0.71          | 1454          | 1.39          |
| 2.227          | 14609          | 0.74          | 1215          | 1.16          |
| 2.593          | 538            | 0.03          | 60            | 0.06          |
| 2.793          | 166            | 0.01          | 50            | 0.05          |
| 5.547          | 9870           | 0.50          | 657           | 0.63          |
| 7.560          | 1924028        | 97.68         | 100395        | 95.67         |
| 8.827          | 602            | 0.03          | 235           | 0.22          |
| 8.880          | 1734           | 0.09          | 214           | 0.20          |
| 9.040          | 647            | 0.03          | 156           | 0.15          |
| 9.140          | 831            | 0.04          | 127           | 0.12          |
| 9.287          | 283            | 0.01          | 74            | 0.07          |
| 9.413          | 203            | 0.01          | 54            | 0.05          |
| 9.500          | 89             | 0.00          | 34            | 0.03          |
| <b>Totals</b>  | <b>1969639</b> | <b>100.00</b> | <b>104944</b> | <b>100.00</b> |

-----  
 ---< General Method Parameters >-----  
 -----

**Jasco Pumps**

=====

Model: PU-2086

Area % Report

Data File: C:\EZChrom Elite\Enterprise\Projects\Nick Lawrence\Data\Roberta\RPM1330 CH3CN 30%  
 TFA 0.1 in H2O 70% 1ml 20 min.met 3-13-2009 5-52-12 AM  
 Method: C:\EZChrom Elite\Enterprise\Projects\Nick Lawrence\Method\Roberta\CH3CN 30% TFA 0.1 in  
 H2O 70% 1ml 20 min.met  
 Acquired: 3/13/2009 5:53:43 AM  
 Printed: 3/13/2009 10:43:53 AM

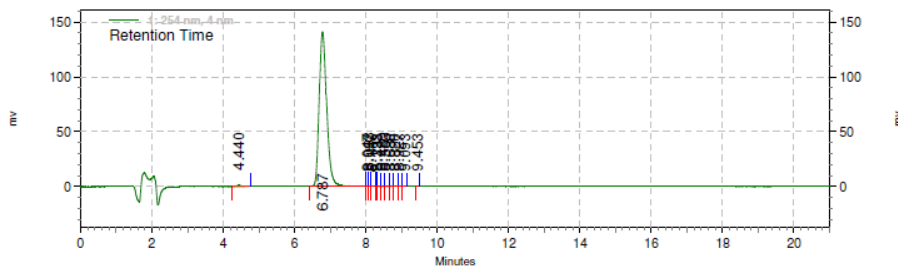

1: 254 nm, 4 nm  
 Results

| Retention Time | Area    | Area % | Height | Height % |
|----------------|---------|--------|--------|----------|
| 4.440          | 10861   | 0.52   | 1061   | 0.74     |
| 6.787          | 2075133 | 99.19  | 140782 | 98.35    |
| 8.047          | 903     | 0.04   | 200    | 0.14     |
| 8.093          | 590     | 0.03   | 185    | 0.13     |
| 8.147          | 1308    | 0.06   | 174    | 0.12     |
| 8.293          | 185     | 0.01   | 120    | 0.08     |
| 8.333          | 647     | 0.03   | 127    | 0.09     |
| 8.480          | 591     | 0.03   | 109    | 0.08     |
| 8.553          | 489     | 0.02   | 97     | 0.07     |
| 8.680          | 489     | 0.02   | 86     | 0.06     |
| 8.820          | 340     | 0.02   | 66     | 0.05     |
| 8.927          | 167     | 0.01   | 54     | 0.04     |
| 9.093          | 170     | 0.01   | 39     | 0.03     |
| 9.453          | 151     | 0.01   | 50     | 0.03     |

| Totals | Area    | Area % | Height | Height % |
|--------|---------|--------|--------|----------|
|        | 2092024 | 100.00 | 143150 | 100.00   |

-----  
 ---< General Method Parameters >-----  
 -----

Jasco Pumps

=====  
 Model: PU-2086  
 Control mode: Binary HPG

HPLC trace of **5aa**

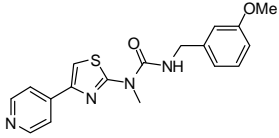

Area % Report

Data File: C:\EZChrom Elite\Enterprise\Projects\Nick Lawrence\Data\Roberta\RPM1336 MeOH 50% TFA  
 0.1 in H2O 50% 1ml 20 min.met 4-7-2009 4:48:30 PM  
 Method: C:\EZChrom Elite\Enterprise\Projects\Nick Lawrence\Method\Roberta\MeOH 50% TFA 0.1 in  
 H2O 50% 1ml 20 min TEMPL.met  
 Acquired: 4/7/2009 4:50:02 PM  
 Printed: 5/6/2009 5:01:26 PM

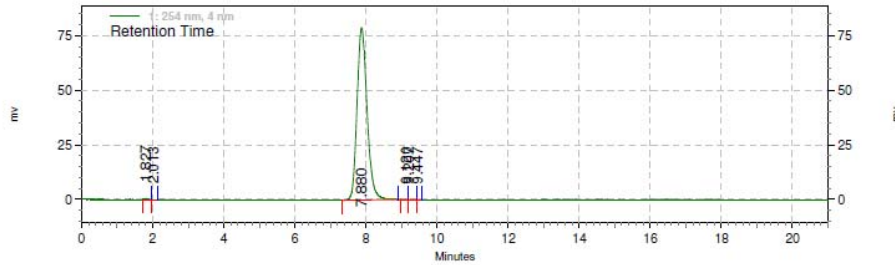

1: 254 nm, 4 nm  
 Results

| Retention Time | Area    | Area % | Height | Height % |
|----------------|---------|--------|--------|----------|
| 1.827          | 5073    | 0.33   | 594    | 0.75     |
| 2.013          | 748     | 0.05   | 102    | 0.13     |
| 7.880          | 1548799 | 99.49  | 78783  | 98.82    |
| 9.120          | 752     | 0.05   | 96     | 0.12     |
| 9.207          | 1003    | 0.06   | 95     | 0.12     |
| 9.447          | 365     | 0.02   | 55     | 0.07     |

| Totals | Area    | Area % | Height | Height % |
|--------|---------|--------|--------|----------|
|        | 1556740 | 100.00 | 79725  | 100.00   |

PDA-199 nm  
 Results

| Retention Time | Area | Area % | Height | Height % |
|----------------|------|--------|--------|----------|
| 0.087          | 3831 | 0.02   | 973    | 0.04     |
| 0.227          | 4596 | 0.03   | 1123   | 0.05     |
| 0.280          | 3512 | 0.02   | 1676   | 0.07     |
| 0.393          | 3548 | 0.02   | 1027   | 0.04     |
| 0.460          | 5985 | 0.04   | 1031   | 0.04     |
| 0.600          | 2261 | 0.01   | 1072   | 0.05     |
| 0.653          | 4162 | 0.03   | 1120   | 0.05     |
| 0.740          | 2435 | 0.02   | 1288   | 0.06     |
| 0.840          | 7802 | 0.05   | 1495   | 0.06     |
| 0.953          | 3353 | 0.02   | 1195   | 0.05     |
| 1.020          | 3052 | 0.02   | 903    | 0.04     |



HPLC trace of **5ab**

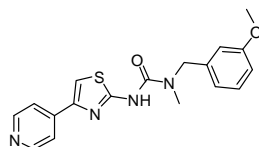

Area % Report

Data File: C:\EZChrom Elite\Enterprise\Projects\Nick Lawrence\Data\Roberta\RPM1363 CH3CN 30%  
 TFA 0.1 in H2O 70% 1ml 20 min TEMPL.met 5-13-2009 11-05-17 PM  
 Method: C:\EZChrom Elite\Enterprise\Projects\Nick Lawrence\Method\Roberta\CH3CN 30% TFA 0.1 in  
 H2O 70% 1ml 20 min TEMPL.met  
 Acquired: 5/13/2009 11:06:47 PM  
 Printed: 5/14/2009 10:22:01 AM

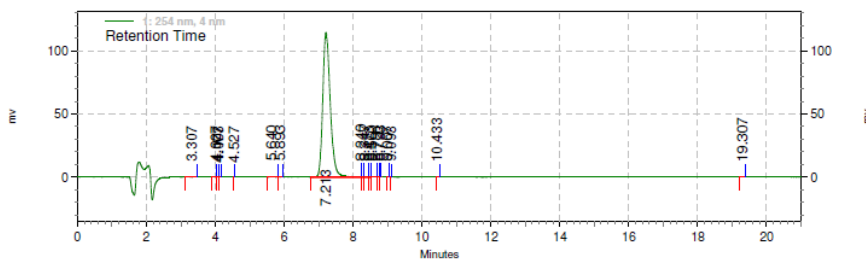

1: 254 nm, 4 nm  
 Results

| Retention Time | Area    | Area % | Height | Height % |
|----------------|---------|--------|--------|----------|
| 3.307          | 1664    | 0.10   | 183    | 0.16     |
| 4.027          | 283     | 0.02   | 56     | 0.05     |
| 4.073          | 87      | 0.01   | 61     | 0.05     |
| 4.107          | 74      | 0.00   | 37     | 0.03     |
| 4.527          | 50      | 0.00   | 45     | 0.04     |
| 5.640          | 955     | 0.06   | 90     | 0.08     |
| 5.893          | 249     | 0.01   | 55     | 0.05     |
| 7.213          | 1721771 | 99.59  | 114302 | 98.86    |
| 8.240          | 799     | 0.05   | 172    | 0.15     |
| 8.347          | 1020    | 0.06   | 154    | 0.13     |
| 8.473          | 405     | 0.02   | 124    | 0.11     |
| 8.560          | 618     | 0.04   | 93     | 0.08     |
| 8.720          | 194     | 0.01   | 67     | 0.06     |
| 8.793          | 82      | 0.00   | 52     | 0.04     |
| 9.007          | 59      | 0.00   | 27     | 0.02     |
| 9.093          | 28      | 0.00   | 36     | 0.03     |
| 10.433         | 85      | 0.00   | 14     | 0.01     |
| 19.307         | 395     | 0.02   | 56     | 0.05     |

|        |         |        |        |        |
|--------|---------|--------|--------|--------|
| Totals | 1728818 | 100.00 | 115624 | 100.00 |
|--------|---------|--------|--------|--------|

Spectrum Max  
 Plot Results

# HPLC trace of 12

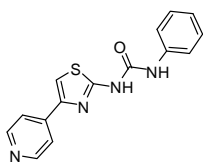

## Area % Report

Data File: C:\EZChrom Elite\Enterprise\Projects\Nick Lawrence\Data\Roberta\RPM1188MeOH 50% TFA  
 0.1 in H2O 50% 1ml 20 min TEMPL.met9-9-2011 8-02-03 PM  
 Method: C:\EZChrom Elite\Enterprise\Projects\Nick Lawrence\Method\Roberta\MeOH 40% TFA 0.1 in  
 H2O 60% 1ml 20 min TEMPL.met  
 Acquired: 9/9/2011 8:03:34 PM  
 Printed: 9/11/2011 1:22:36 PM

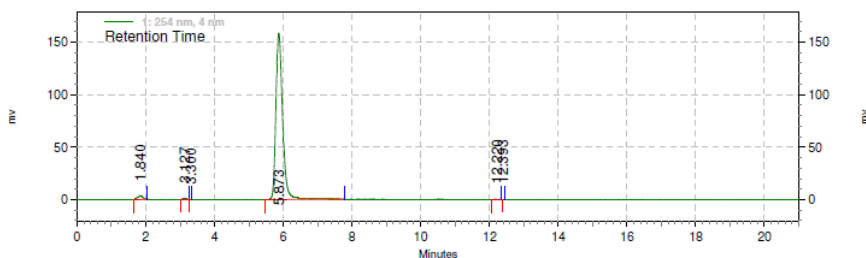

### 1: 254 nm, 4 nm

#### Results

| Retention Time | Area    | Area % | Height | Height % |
|----------------|---------|--------|--------|----------|
| 1.840          | 36585   | 1.65   | 3660   | 2.23     |
| 3.127          | 7887    | 0.36   | 1082   | 0.66     |
| 3.300          | 420     | 0.02   | 199    | 0.12     |
| 5.873          | 2163573 | 97.84  | 158579 | 96.74    |
| 12.220         | 2850    | 0.13   | 299    | 0.18     |
| 12.393         | 110     | 0.00   | 109    | 0.07     |

| Totals |         |        |        |        |
|--------|---------|--------|--------|--------|
|        | 2211425 | 100.00 | 163928 | 100.00 |

### Spectrum Max

#### Plot Results

| Retention Time | Area | Area % | Height | Height % |
|----------------|------|--------|--------|----------|
| 0.220          | 844  | 0.02   | 822    | 0.13     |
| 0.380          | 1304 | 0.04   | 852    | 0.13     |
| 0.413          | 1054 | 0.03   | 0      | 0.00     |
| 0.507          | 2175 | 0.06   | 1430   | 0.22     |
| 0.773          | 686  | 0.02   | 838    | 0.13     |
| 0.827          | 678  | 0.02   | 371    | 0.06     |
| 0.907          | 1628 | 0.04   | 1999   | 0.31     |
| 0.987          | 2875 | 0.08   | 2948   | 0.45     |
| 1.080          | 1487 | 0.04   | 2692   | 0.41     |
| 1.133          | 1877 | 0.05   | 1346   | 0.21     |
| 1.213          | 678  | 0.02   | 408    | 0.06     |

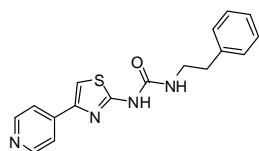

Area % Report

Data File: C:\EZChrom Elite\Enterprise\Projects\Nick Lawrence\Data\Roberta\RPM1325 CH3CN 30%  
 TFA 0.1 in H2O 70% 1ml 20 min.met 3-13-2009 2-51-27 AM  
 Method: C:\EZChrom Elite\Enterprise\Projects\Nick Lawrence\Method\Roberta\CH3CN 30% TFA 0.1 in  
 H2O 70% 1ml 20 min.met  
 Acquired: 3/13/2009 2:52:58 AM  
 Printed: 3/13/2009 10:41:23 AM

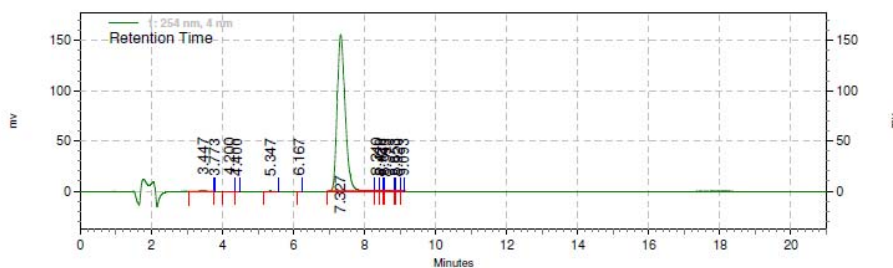

1: 254 nm, 4 nm

Results

| Retention Time | Area    | Area % | Height | Height % |
|----------------|---------|--------|--------|----------|
| 3.447          | 13587   | 0.55   | 1533   | 0.96     |
| 3.773          | 79      | 0.00   | 35     | 0.02     |
| 4.200          | 1382    | 0.06   | 158    | 0.10     |
| 4.400          | 185     | 0.01   | 48     | 0.03     |
| 5.347          | 4507    | 0.18   | 409    | 0.26     |
| 6.167          | 216     | 0.01   | 41     | 0.03     |
| 7.327          | 2437843 | 98.95  | 155855 | 97.95    |
| 8.340          | 1454    | 0.06   | 253    | 0.16     |
| 8.420          | 1317    | 0.05   | 226    | 0.14     |
| 8.540          | 593     | 0.02   | 195    | 0.12     |
| 8.593          | 1819    | 0.07   | 188    | 0.12     |
| 8.853          | 236     | 0.01   | 69     | 0.04     |
| 8.920          | 309     | 0.01   | 61     | 0.04     |
| 9.093          | 140     | 0.01   | 44     | 0.03     |

|        |         |        |        |        |
|--------|---------|--------|--------|--------|
| Totals | 2463667 | 100.00 | 159115 | 100.00 |
|--------|---------|--------|--------|--------|

-----  
 ---< General Method Parameters >-----  
 -----

Jasco Pumps

=====  
 Model: PU-2086  
 Control mode: Binary HPG

Area % Report

Data File: CAEZChrom Elite\Enterprise\Projects\Nick Lawrence\Data\Roberta\RPM1325 MeOH 50 TFA  
 0.1 in H2O 50 1ml 20 min.met 3-10-2009 11-40-39 PM  
 Method: CAEZChrom Elite\Enterprise\Projects\Nick Lawrence\Method\Roberta\MeOH 50% TFA 0.1 in  
 H2O 50% 1ml 20 min.met  
 Acquired: 3/10/2009 11:42:10 PM  
 Printed: 3/11/2009 10:04:27 AM

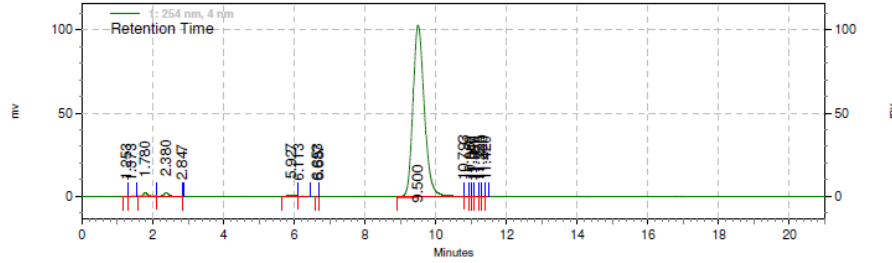

1: 254 nm, 4 nm

Results

| Retention Time | Area    | Area % | Height | Height % |
|----------------|---------|--------|--------|----------|
| 1.253          | 390     | 0.02   | 69     | 0.06     |
| 1.373          | 685     | 0.03   | 92     | 0.08     |
| 1.780          | 18523   | 0.78   | 1995   | 1.83     |
| 2.380          | 23886   | 1.01   | 2219   | 2.03     |
| 2.847          | 99      | 0.00   | 53     | 0.05     |
| 5.927          | 10368   | 0.44   | 681    | 0.62     |
| 6.113          | 3664    | 0.15   | 362    | 0.33     |
| 6.653          | 114     | 0.00   | 35     | 0.03     |
| 6.687          | 0       | 0.00   | 0      | 0.00     |
| 9.500          | 2302555 | 97.38  | 102844 | 94.21    |
| 10.793         | 1747    | 0.07   | 220    | 0.20     |
| 10.960         | 521     | 0.02   | 156    | 0.14     |
| 11.047         | 357     | 0.02   | 120    | 0.11     |
| 11.080         | 724     | 0.03   | 114    | 0.10     |
| 11.220         | 348     | 0.01   | 86     | 0.08     |
| 11.320         | 261     | 0.01   | 64     | 0.06     |
| 11.420         | 251     | 0.01   | 51     | 0.05     |

|        |         |        |        |        |
|--------|---------|--------|--------|--------|
| Totals | 2364493 | 100.00 | 109161 | 100.00 |
|--------|---------|--------|--------|--------|

-----  
 ---< General Method Parameters >-----  
 -----

Jasco Pumps

HPLC trace1 of (R)-14a.

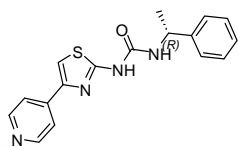

Area % Report

Data File: C:\EZChrom Elite\Data\Roberta\RPM1242MeOH50 0.1%TFA H2O50 20min 1ml.met 2-2-2009 7-42-06 PM  
 Method: C:\EZChrom Elite\Methods\Roberta\MeOH50 0.1%TFA H2O50 20min 1ml.met  
 Acquired: 2/2/2009 7:42:46 PM  
 Printed: 2/3/2009 9:18:23 AM  
 Vial: 12

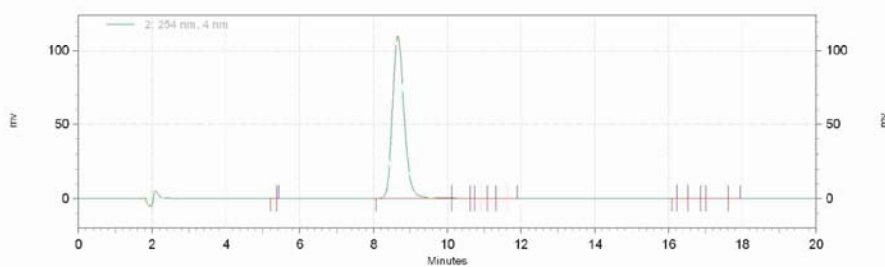

2: 254 nm, 4 nm Results

| Pk # | Retention Time | Area    | Area Percent |
|------|----------------|---------|--------------|
| 1    | 5.253          | 257     | 0.011        |
| 2    | 5.400          | 107     | 0.004        |
| 3    | 8.653          | 2429451 | 99.516       |
| 4    | 10.147         | 4518    | 0.185        |
| 5    | 10.707         | 704     | 0.029        |
| 6    | 10.813         | 881     | 0.036        |
| 7    | 10.947         | 629     | 0.026        |
| 8    | 11.120         | 712     | 0.029        |
| 9    | 11.333         | 758     | 0.031        |
| 10   | 11.693         | 431     | 0.018        |
| 11   | 16.147         | 159     | 0.007        |
| 12   | 16.360         | 494     | 0.020        |
| 13   | 16.800         | 422     | 0.017        |
| 14   | 16.920         | 193     | 0.008        |
| 15   | 17.440         | 911     | 0.037        |
| 16   | 17.867         | 641     | 0.026        |

|        |  |         |         |
|--------|--|---------|---------|
| Totals |  | 2441268 | 100.000 |
|--------|--|---------|---------|

-----  
 ---< General Method Parameters >-----  
 -----

## Area % Report

Data File: C:\EZChrom Elite\Data\Roberta\RPM1242 CH3CN30 H2O70 0.1TFA 1mL 20min.met  
1-27-2009 7:04:07 PM  
Method: C:\EZChrom Elite\Methods\Xin\CH3CN30 H2O70 0.1TFA 1mL 20min.met  
Acquired: 1/27/2009 7:04:47 PM  
Printed: 1/28/2009 10:46:07 AM  
Vial: 22

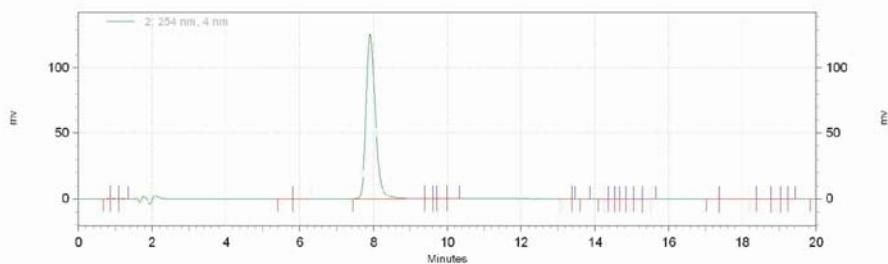

## 2: 254 nm, 4 nm Results

| Pk # | Retention Time | Area    | Area Percent |
|------|----------------|---------|--------------|
| 1    | 0.773          | 799     | 0.036        |
| 2    | 0.947          | 1213    | 0.055        |
| 3    | 1.187          | 963     | 0.043        |
| 4    | 5.507          | 737     | 0.033        |
| 5    | 5.960          | 767     | 0.034        |
| 6    | 7.907          | 2206200 | 99.224       |
| 7    | 9.413          | 1755    | 0.079        |
| 8    | 9.640          | 670     | 0.030        |
| 9    | 9.773          | 1169    | 0.053        |
| 10   | 10.067         | 912     | 0.041        |
| 11   | 13.120         | 526     | 0.024        |
| 12   | 13.387         | 138     | 0.006        |
| 13   | 13.667         | 253     | 0.011        |
| 14   | 14.173         | 239     | 0.011        |
| 15   | 14.320         | 131     | 0.006        |
| 16   | 14.400         | 229     | 0.010        |
| 17   | 14.653         | 231     | 0.010        |
| 18   | 14.773         | 292     | 0.013        |
| 19   | 14.947         | 308     | 0.014        |
| 20   | 15.067         | 505     | 0.023        |
| 21   | 15.360         | 436     | 0.020        |
| 22   | 15.627         | 253     | 0.011        |
| 23   | 17.067         | 457     | 0.021        |

**Area Percent Report**

data\Roberta\RP1124Batch23Feb2009 Chiral IPA 50 Hex 50 Flow 1ml 20min.met 2-27-2009 4:05:30 PM.dat  
 Acquired: 2/27/2009 4:05:55 PM  
 Page 1 of 2 Data File: C:\HPLC  
 Printed: 2/27/2009 4:42:41 PM

Analyst: System  
 Sample ID: RP1124Batch23Feb2009  
 Vial: N/A  
 Injection Volume: 0

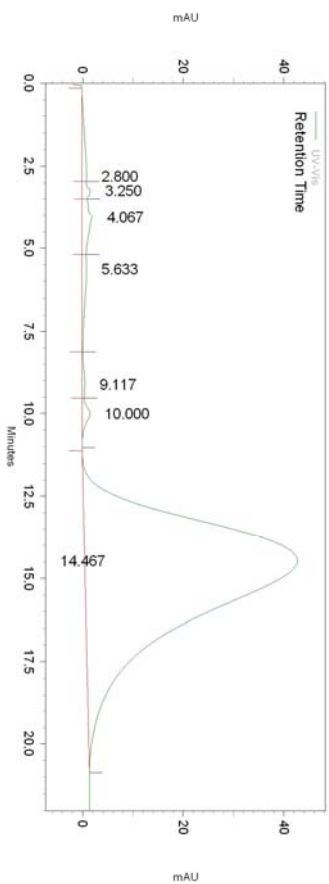

**UV-Vis Results**

| Name | Retention Time | Area   | Area Percent | Integration Codes |
|------|----------------|--------|--------------|-------------------|
|      | 2.800          | 90418  | 1.009        | BY                |
|      | 3.250          | 40688  | 0.454        | VV                |
|      | 4.067          | 135630 | 1.513        | VV                |
|      | 5.633          | 97583  | 1.089        | VV                |
|      | 9.117          | 33003  | 0.368        | VV                |

Instrument Name: HPLC  
 Acquisition Method: C:\EZStart\Projects\Default\Method\Roberta\Chiral IPA 50 Hex 50 Flow 1ml 20min.met  
 Sequence: C:\HPLC\data\Danabc.seq  
 Software Version: Version 3.1.7

# Area Percent Report

Page 2 of 2 Data File: C:\HPLC

data\Robertal\RP\MI242\Batch23\Feb2009 Chiral IPA 50 Hex 50 Flow1ml 20min.met2-27-2009 4:05:30 PM.dat

Acquired: 2/27/2009 4:05:55 PM

Printed: 2/27/2009 4:42:41 PM

|        |  |         |         |  |
|--------|--|---------|---------|--|
| Totals |  | 8964676 | 100.000 |  |
|--------|--|---------|---------|--|

Instrument Name: HPLC      Software Version: Version 3.1.7  
Acquisition Method: C:\EZStart\Projects\Default\Method\Robertal\Chiral IPA 50 Hex 50 Flow1ml 20min.met  
Sequence: C:\HPLC data\Dan\abc.seq



HPLC trace1 of (S)-14a.

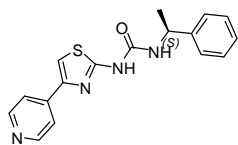

Area % Report

Data File: C:\EZChrom Elite\Data\Roberta\RPM1243 CH3CN30 H2O70 0.1TFA 1mL 20min.met  
 1-27-2009 7:45-41 PM  
 Method: C:\EZChrom Elite-Methods\Xin\CH3CN30 H2O70 0.1TFA 1mL 20min.met  
 Acquired: 1/27/2009 7:46:23 PM  
 Printed: 1/28/2009 10:48:13 AM  
 Vial: 23

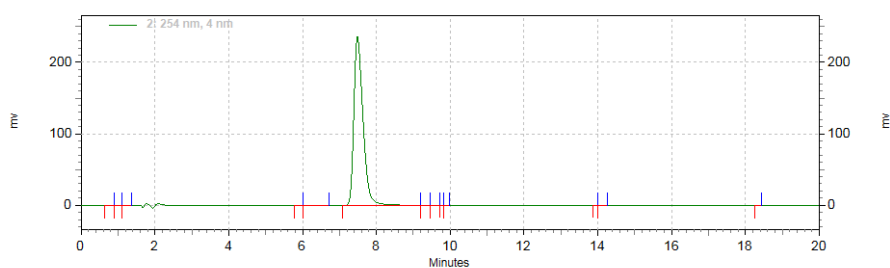

2: 254 nm, 4 nm Results

| Pk # | Retention Time | Area    | Area Percent |
|------|----------------|---------|--------------|
| 1    | 0.773          | 934     | 0.023        |
| 2    | 0.947          | 1023    | 0.025        |
| 3    | 1.187          | 939     | 0.023        |
| 4    | 5.867          | 407     | 0.010        |
| 5    | 6.520          | 1236    | 0.030        |
| 6    | 7.480          | 4055942 | 99.745       |
| 7    | 9.213          | 2449    | 0.060        |
| 8    | 9.467          | 1667    | 0.041        |
| 9    | 9.773          | 434     | 0.011        |
| 10   | 9.907          | 423     | 0.010        |
| 11   | 13.893         | 224     | 0.006        |
| 12   | 14.160         | 388     | 0.010        |
| 13   | 18.293         | 238     | 0.006        |

| Totals | Area    | Area Percent |
|--------|---------|--------------|
|        | 4066304 | 100.000      |

-----  
 << General Method Parameters >>-----  
 -----

Jasco Pumps

## Area % Report

Data File: C:\EZChrom Elite\Data\Roberta\RPM1243MeOH50 0.1%TFA H2O50 20min 1ml.met 2-2-2009  
 9-05-17 PM  
 Method: C:\EZChrom Elite\Methods\Roberta\MeOH50 0.1%TFA H2O50 20min 1ml.met  
 Acquired: 2/2/2009 9:05:58 PM  
 Printed: 2/3/2009 9:22:10 AM  
 Vial: 14

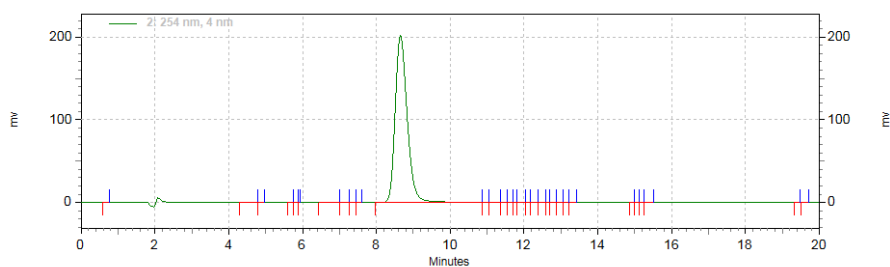

## 2: 254 nm, 4 nm Results

| PK # | Retention Time | Area    | Area Percent |
|------|----------------|---------|--------------|
| 1    | 0.680          | 372     | 0.008        |
| 2    | 4.573          | 1020    | 0.022        |
| 3    | 4.787          | 304     | 0.007        |
| 4    | 5.667          | 201     | 0.004        |
| 5    | 5.787          | 144     | 0.003        |
| 6    | 5.907          | 76      | 0.002        |
| 7    | 6.640          | 1182    | 0.026        |
| 8    | 7.080          | 423     | 0.009        |
| 9    | 7.333          | 282     | 0.006        |
| 10   | 7.453          | 209     | 0.005        |
| 11   | 8.653          | 4556346 | 99.545       |
| 12   | 10.920         | 2051    | 0.045        |
| 13   | 11.067         | 3293    | 0.072        |
| 14   | 11.427         | 1403    | 0.031        |
| 15   | 11.573         | 1117    | 0.024        |
| 16   | 11.733         | 740     | 0.016        |
| 17   | 11.960         | 1483    | 0.032        |
| 18   | 12.093         | 775     | 0.017        |
| 19   | 12.227         | 1037    | 0.023        |
| 20   | 12.453         | 959     | 0.021        |
| 21   | 12.600         | 445     | 0.010        |
| 22   | 12.733         | 678     | 0.015        |
| 23   | 12.893         | 419     | 0.009        |

**Area Percent Report**

data\Roberta\RPM1243B\ch23Feb2009 Chiral IPA 50 Hex 50 flow\ml 20min.met 2-25-2009 5:26:17 PM.dat  
 Page 1 of 2 Data File: C:\HPLC  
 Acquired: 2/25/2009 5:26:41 PM Printed: 2/25/2009 5:50:10 PM

Analyst: System Vial: N/A Injection Volume: 0  
 Sample ID: RPM1243B\ch23Feb2009

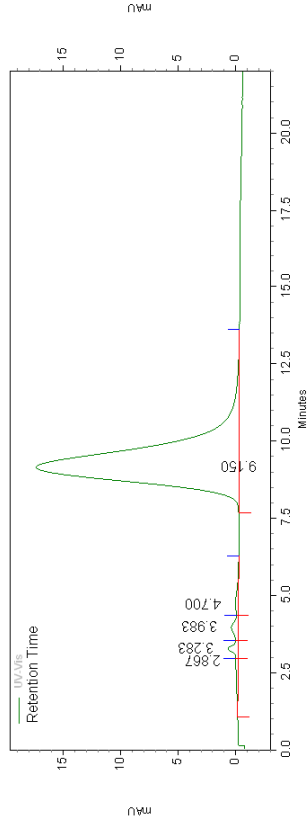

**UV-Vis Results**

| Name | Retention Time | Area    | Area Percent | Integration Codes |
|------|----------------|---------|--------------|-------------------|
|      | 2.867          | 12411   | 0.905        | BV                |
|      | 3.283          | 15891   | 1.159        | VV                |
|      | 3.983          | 18796   | 1.371        | VV                |
|      | 4.700          | 13529   | 0.987        | VB                |
|      | 9.150          | 1310264 | 95.578       | BB                |

Instrument Name: HPLC Software Version: Version 3.1.7  
 Acquisition Method: C:\EZStart\Projects\Default\Method\Roberta\Chiral IPA 50 Hex 50 flow\ml 20min.met  
 Sequence: C:\HPLC\data\Dom\abc.seq

# Area Percent Report

data\Roberta RPM1243\Btch23Feb2009 Chiral IPA 50 Hex 50 flow\ml 20min.met  
Acquired: 2/25/2009 5:26:41 PM

Page 2 of 2 Data File: C:\HPLC  
2-25-2009 5:26-17 PM.dat  
Printed: 2/25/2009 5:50:10 PM

|        |  |         |         |
|--------|--|---------|---------|
| Totals |  | 1370891 | 100.000 |
|--------|--|---------|---------|

Instrument Name: HPLC Software Version: Version 3.1.7  
Acquisition Method: C:\EZStart\Projects\Default\Method\Roberta\Chiral IPA 50 Hex 50 flow\ml 20min.met  
Sequence: C:\HPLC\data\Dan\abc.seq

HPLC trace1 of (S)-14b

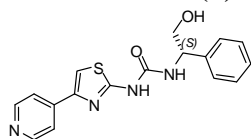

Area % Report

Data File: C:\EZChrom Elite\Enterprise\Projects\Nick Lawrence\Data\Roberta\RPM1329 CH3CN 20%  
 TFA 0.1 in H2O 80% 1ml 20 min TEMP.met 12-31-2009 4:40-01 PM  
 Method: C:\EZChrom Elite\Enterprise\Projects\Nick Lawrence\Method\Roberta\CH3CN 20% TFA 0.1 in  
 H2O 80% 1ml 20 min TEMP.met  
 Acquired: 12/31/2009 4:41:32 PM  
 Printed: 1/5/2010 9:42:58 AM

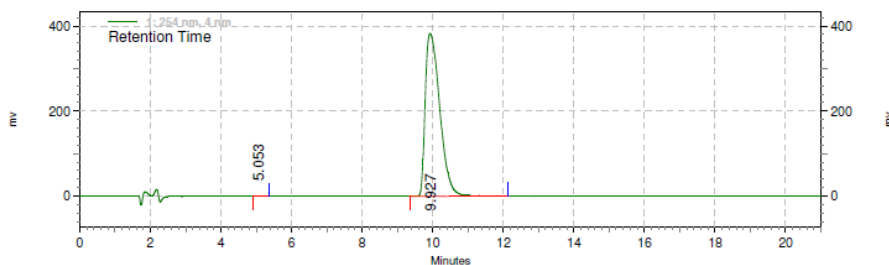

1: 254 nm, 4 nm  
 Results

| Retention Time | Area            | Area %        | Height        | Height %      |
|----------------|-----------------|---------------|---------------|---------------|
| 5.053          | 7155            | 0.07          | 557           | 0.15          |
| 9.927          | 10921804        | 99.93         | 382382        | 99.85         |
| <b>Totals</b>  | <b>10928959</b> | <b>100.00</b> | <b>382939</b> | <b>100.00</b> |

Spectrum Max  
 Plot Results

| Retention Time | Area    | Area % | Height | Height % |
|----------------|---------|--------|--------|----------|
| 0.060          | 476     | 0.00   | 240    | 0.02     |
| 0.127          | 397     | 0.00   | 254    | 0.02     |
| 0.207          | 259     | 0.00   | 125    | 0.01     |
| 0.273          | 568     | 0.00   | 168    | 0.01     |
| 0.333          | 877     | 0.00   | 152    | 0.01     |
| 0.433          | 1792    | 0.01   | 199    | 0.01     |
| 0.620          | 799     | 0.00   | 273    | 0.02     |
| 0.780          | 3341    | 0.02   | 390    | 0.03     |
| 0.893          | 2754    | 0.02   | 479    | 0.04     |
| 1.033          | 1860    | 0.01   | 433    | 0.03     |
| 1.133          | 4662    | 0.03   | 557    | 0.04     |
| 1.287          | 5558    | 0.03   | 625    | 0.05     |
| 1.447          | 3307    | 0.02   | 622    | 0.05     |
| 1.753          | 1673506 | 9.20   | 314481 | 23.32    |
| 1.853          | 84812   | 0.47   | 11572  | 0.86     |

Area % Report

Data File: C:\EZChrom Elite\Enterprise\Projects\Nick Lawrence\Data\Roberta\RPM1329 MeOH 40% TFA  
 0.1 in H2O 60% 1ml 20 min TEMPL.met 1-5-2010 7-48-13 PM  
 Method: C:\EZChrom Elite\Enterprise\Projects\Nick Lawrence\Method\Roberta\MeOH 40% TFA 0.1 in  
 H2O 60% 1ml 20 min TEMPL.met  
 Acquired: 1/5/2010 7:49:42 PM  
 Printed: 1/6/2010 9:49:51 AM

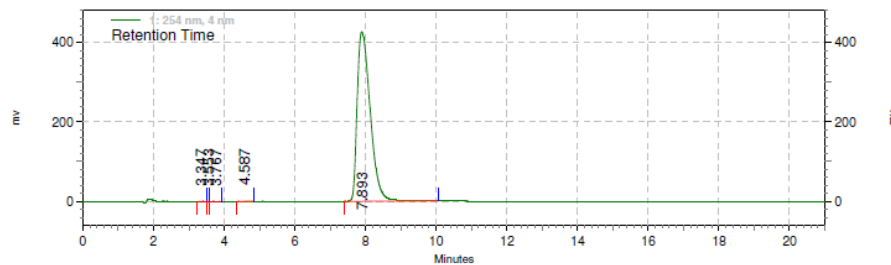

1: 254 nm, 4 nm  
 Results

| Retention Time | Area     | Area % | Height | Height % |
|----------------|----------|--------|--------|----------|
| 3.347          | 1399     | 0.01   | 144    | 0.03     |
| 3.553          | 124      | 0.00   | 62     | 0.01     |
| 3.767          | 1469     | 0.01   | 153    | 0.04     |
| 4.587          | 5721     | 0.05   | 414    | 0.10     |
| 7.893          | 10925296 | 99.92  | 426403 | 99.82    |

| Totals |          |        |        |        |
|--------|----------|--------|--------|--------|
|        | 10934009 | 100.00 | 427176 | 100.00 |

Spectrum Max  
 Plot Results

| Retention Time | Area   | Area % | Height | Height % |
|----------------|--------|--------|--------|----------|
| 0.153          | 221    | 0.00   | 242    | 0.04     |
| 0.253          | 390    | 0.00   | 197    | 0.03     |
| 0.780          | 369    | 0.00   | 340    | 0.05     |
| 0.900          | 291    | 0.00   | 74     | 0.01     |
| 0.993          | 189    | 0.00   | 92     | 0.01     |
| 1.067          | 349    | 0.00   | 124    | 0.02     |
| 1.193          | 293    | 0.00   | 168    | 0.03     |
| 1.287          | 212    | 0.00   | 77     | 0.01     |
| 1.373          | 217    | 0.00   | 89     | 0.01     |
| 1.473          | 483    | 0.00   | 121    | 0.02     |
| 1.767          | 646594 | 4.56   | 92285  | 14.33    |
| 2.267          | 644    | 0.00   | 189    | 0.03     |

**Area Percent Report**  
 data\Roberta\RPM1329 OJ Col 20microl Chiral IPA 70 Hex 30 flow 1ml 20min.met2-26-2009 5-02-52 PM.dat  
 Page 1 of 2 Data File: C:\HPLC  
 Acquired: 2/26/2009 5:03:34 PM  
 Printed: 2/26/2009 5:27:38 PM

Analyst: System  
 Sample ID: RPM1329 OJ Col 20microl Vial: N/A Injection Volume: 0

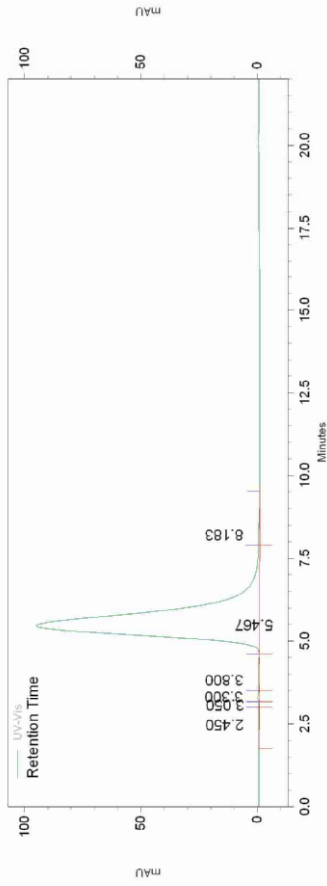

| Name | Retention Time | Area    | Area Percent | Integration Codes |
|------|----------------|---------|--------------|-------------------|
|      | 2.450          | 7955    | 0.169        | BV                |
|      | 3.050          | 1080    | 0.023        | VB                |
|      | 3.300          | 8286    | 0.176        | BV                |
|      | 3.800          | 18787   | 0.399        | VV                |
|      | 5.467          | 4650900 | 98.777       | VV                |

Instrument Name: HPLC  
 Acquisition Method: C:\EZStart\Projects\Default\Method\Roberta\Chiral IPA 70 Hex 30 flow 1ml 20min.met  
 Sequence: C:\HPLC data\Dan\abc.seq  
 Software Version: Version 3.1.7

# Area Percent Report

data\Roberta\REP1329 OJ Col 20microl Chiral IPA 70 Hex 30 flow 1ml 20min.met2-26-2009 5:02:52 PM.dat  
Acquired: 2/26/2009 5:03:34 PM

Page 2 of 2 Data File: C:\HPLC

Printed: 2/26/2009 5:27:38 PM

8.183 21487 0.456 VB

|        |  |         |         |
|--------|--|---------|---------|
| Totals |  | 4708495 | 100.000 |
|--------|--|---------|---------|

Instrument Name: HPLC Software Version: Version 3.1.7  
Acquisition Method: C:\EZStart\Projects\Default\Method\Roberta\Chiral IPA 70 Hex 30 flow 1ml 20min.met  
Sequence: C:\HPLC data\Dan\abc.seq



# HPLC1 trace of (RS)-14b

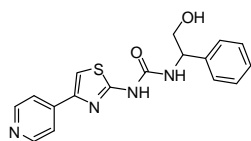

## Area % Report

Data File: C:\EZChrom Elite\Enterprise\Projects\Nick Lawrence\Data\Roberta\RPM1324 CH3CN 20%  
 TFA 0.1 in H2O 80% 1ml 20 min TEMP.met 12-31-2009 12-54-01 PM  
 Method: C:\EZChrom Elite\Enterprise\Projects\Nick Lawrence\Method\Roberta\CH3CN 20% TFA 0.1 in  
 H2O 80% 1ml 20 min TEMP.met  
 Acquired: 12/31/2009 12:55:33 PM  
 Printed: 12/31/2009 1:33:07 PM

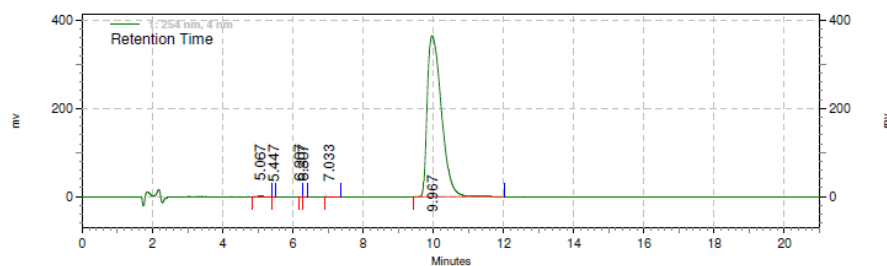

### 1: 254 nm, 4 nm Results

| Retention Time | Area     | Area % | Height | Height % |
|----------------|----------|--------|--------|----------|
| 5.067          | 14447    | 0.14   | 1083   | 0.29     |
| 5.447          | 169      | 0.00   | 43     | 0.01     |
| 6.207          | 286      | 0.00   | 79     | 0.02     |
| 6.307          | 280      | 0.00   | 57     | 0.02     |
| 7.033          | 3298     | 0.03   | 235    | 0.06     |
| 9.967          | 10226775 | 99.82  | 365654 | 99.59    |
| <b>Totals</b>  |          |        |        |          |
|                | 10245255 | 100.00 | 367151 | 100.00   |

### Spectrum Max Plot Results

| Retention Time | Area | Area % | Height | Height % |
|----------------|------|--------|--------|----------|
| 0.213          | 4133 | 0.02   | 856    | 0.06     |
| 0.400          | 1795 | 0.01   | 58     | 0.00     |
| 0.440          | 1137 | 0.01   | 861    | 0.06     |
| 0.467          | 1307 | 0.01   | 711    | 0.05     |
| 0.533          | 1162 | 0.01   | 521    | 0.04     |
| 0.647          | 983  | 0.01   | 632    | 0.05     |
| 0.687          | 1133 | 0.01   | 222    | 0.02     |
| 0.867          | 1089 | 0.01   | 464    | 0.03     |
| 0.920          | 1672 | 0.01   | 651    | 0.05     |
| 1.047          | 798  | 0.00   | 792    | 0.06     |
| 1.220          | 1415 | 0.01   | 642    | 0.05     |

Area % Report

Data File: C:\EZChrom Elite\Enterprise\Projects\Nick Lawrence\Data\Roberta\RPM1324 MeOH 40% TFA  
 0.1 in H2O 60% 1ml 20 min TEMPL.met 1-5-2010 10-03-47 PM  
 Method: C:\EZChrom Elite\Enterprise\Projects\Nick Lawrence\Method\Roberta\MeOH 40% TFA 0.1 in  
 H2O 60% 1ml 20 min TEMPL.met  
 Acquired: 1/5/2010 10:05:18 PM  
 Printed: 1/6/2010 9:56:12 AM

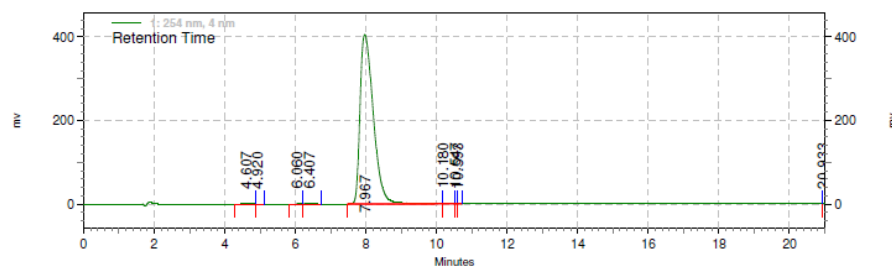

I: 254 nm, 4 nm  
 Results

| Retention Time | Area     | Area % | Height | Height % |
|----------------|----------|--------|--------|----------|
| 4.607          | 14575    | 0.14   | 919    | 0.23     |
| 4.920          | 1499     | 0.01   | 116    | 0.03     |
| 6.060          | 2873     | 0.03   | 224    | 0.05     |
| 6.407          | 5741     | 0.05   | 297    | 0.07     |
| 7.967          | 10565396 | 99.72  | 405155 | 99.48    |
| 10.180         | 4818     | 0.05   | 347    | 0.09     |
| 10.547         | 280      | 0.00   | 125    | 0.03     |
| 10.593         | 403      | 0.00   | 100    | 0.02     |
| 20.933         | 0        | 0.00   | 0      | 0.00     |

| Totals |          |        |        |        |
|--------|----------|--------|--------|--------|
|        | 10595585 | 100.00 | 407283 | 100.00 |

Spectrum Max  
 Plot Results

| Retention Time | Area | Area % | Height | Height % |
|----------------|------|--------|--------|----------|
| 0.087          | 295  | 0.00   | 483    | 0.08     |
| 0.167          | 182  | 0.00   | 283    | 0.05     |
| 0.360          | 857  | 0.01   | 289    | 0.05     |
| 0.573          | 256  | 0.00   | 155    | 0.03     |
| 0.847          | 875  | 0.01   | 230    | 0.04     |
| 0.980          | 274  | 0.00   | 147    | 0.02     |
| 1.073          | 387  | 0.00   | 179    | 0.03     |
| 1.213          | 306  | 0.00   | 224    | 0.04     |

**Area Percent Report**  
 data\Roberta\RPM1324 OJcolumn 20microl Chiral IPA 70 Hex 30 flow 1ml 20min.met2-26-2009 11:31-28 AM.dat  
 Acquired: 2/26/2009 11:31:53 AM  
 Page 1 of 2 Data File: C:\HPLC  
 Printed: 2/26/2009 11:54:31 AM

Analyst: System  
 Sample ID: RPM1324 OJcolumn 20microl  
 Vial: N/A  
 Injection Volume: 0

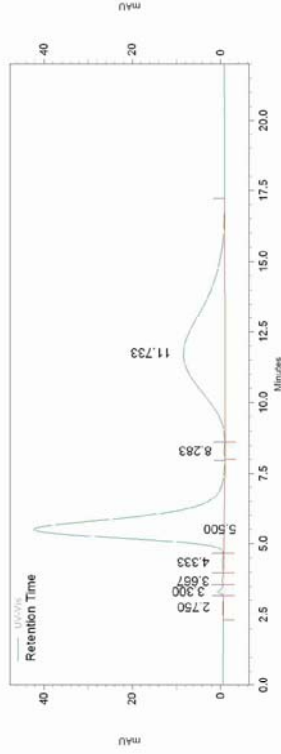

| UV-Vis Results Name | Retention Time | Area    | Area Percent | Integration Codes |
|---------------------|----------------|---------|--------------|-------------------|
|                     | 2.750          | 3338    | 0.081        | BV                |
|                     | 3.300          | 13754   | 0.333        | VV                |
|                     | 3.667          | 6336    | 0.153        | VV                |
|                     | 4.333          | 10907   | 0.264        | VV                |
|                     | 5.500          | 2170601 | 52.583       | VB                |

Instrument Name: HPLC  
 Acquisition Method: C:\EZStart\Projects\Default\Method\Roberta\Chiral IPA 70 Hex 30 flow 1ml 20min.met  
 Sequence: C:\HPLC\data\Dan\abc.seq  
 Software Version: Version 3.1.7

**Area Percent Report**  
 Page 2 of 2 Data File: C:\HPLC\data\Roberta\RP\MI324\OJcolumn 20microl Chiral IPA 70 Hex 30 flow 1ml 20min.met2-26-2009 11-31-28 AM.dat  
 Acquired: 2/26/2009 11:31:53 AM Printed: 2/26/2009 11:54:31 AM

8.283 3169 0.077 BV  
 11.733 1919859 46.508 VB

|        |  |         |         |
|--------|--|---------|---------|
| Totals |  | 4127984 | 100.000 |
|--------|--|---------|---------|

Instrument Name: HPLC Software Version: Version 3.1.7  
 Acquisition Method: C:\EZStart\Projects\Default\Method\Roberta\Chiral IPA 70 Hex 30 flow 1ml 20min.met  
 Sequence: C:\HPLC\data\Dan\abc.seq

HPLC trace 1 of (R)-14b.

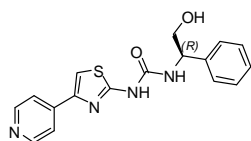

Area % Report

Data File: CAEZChrom Elite\Enterprise\Projects\Nick Lawrence\Data\Roberta\RPM1327 CH3CN 20%  
 TFA 0.1 in H2O 80% 1ml 20 min TEMP.met 12-31-2009 5-25-13 PM  
 Method: CAEZChrom Elite\Enterprise\Projects\Nick Lawrence\Method\Roberta\CH3CN 20% TFA 0.1 in  
 H2O 80% 1ml 20 min TEMP.met  
 Acquired: 12/31/2009 5:26:44 PM  
 Printed: 1/5/2010 9:45:31 AM

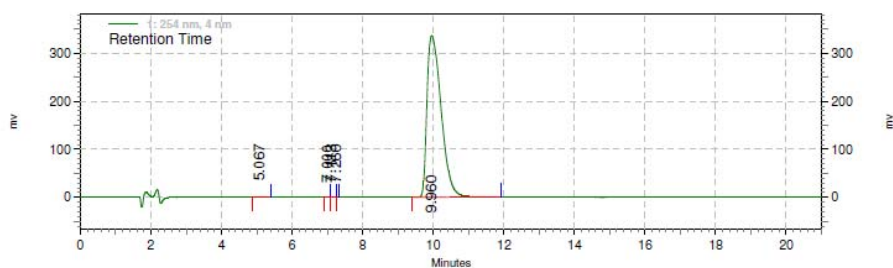

1: 254 nm, 4 nm  
 Results

| Retention Time | Area    | Area % | Height | Height % |
|----------------|---------|--------|--------|----------|
| 5.067          | 8625    | 0.09   | 686    | 0.20     |
| 7.000          | 1030    | 0.01   | 123    | 0.04     |
| 7.113          | 666     | 0.01   | 107    | 0.03     |
| 7.260          | 128     | 0.00   | 62     | 0.02     |
| 9.960          | 9376331 | 99.89  | 336362 | 99.71    |
| Totals         |         |        |        |          |
|                | 9386780 | 100.00 | 337340 | 100.00   |

Spectrum Max  
 Plot Results

| Retention Time | Area | Area % | Height | Height % |
|----------------|------|--------|--------|----------|
| 0.160          | 587  | 0.00   | 425    | 0.03     |
| 0.220          | 578  | 0.00   | 18     | 0.00     |
| 0.300          | 642  | 0.00   | 697    | 0.05     |
| 0.433          | 1393 | 0.01   | 421    | 0.03     |
| 0.527          | 347  | 0.00   | 342    | 0.03     |
| 0.613          | 910  | 0.01   | 784    | 0.06     |
| 0.727          | 1243 | 0.01   | 625    | 0.05     |
| 0.773          | 476  | 0.00   | 873    | 0.06     |
| 0.987          | 751  | 0.00   | 661    | 0.05     |
| 1.113          | 860  | 0.01   | 662    | 0.05     |
| 1.180          | 661  | 0.00   | 477    | 0.04     |
| 1.220          | 801  | 0.00   | 283    | 0.02     |

Area % Report

Data File: C:\EZChrom Elite\Enterprise\Projects\Nick Lawrence\Data\Roberta\RPM1327 MeOH 40% TFA  
 0.1 in H2O 60% 1ml 20 min TEMPL.met 1-5-2010 8-33-22 PM  
 Method: C:\EZChrom Elite\Enterprise\Projects\Nick Lawrence\Method\Roberta\MeOH 40% TFA 0.1 in  
 H2O 60% 1ml 20 min TEMPL.met  
 Acquired: 1/5/2010 8:34:54 PM  
 Printed: 1/6/2010 9:52:02 AM

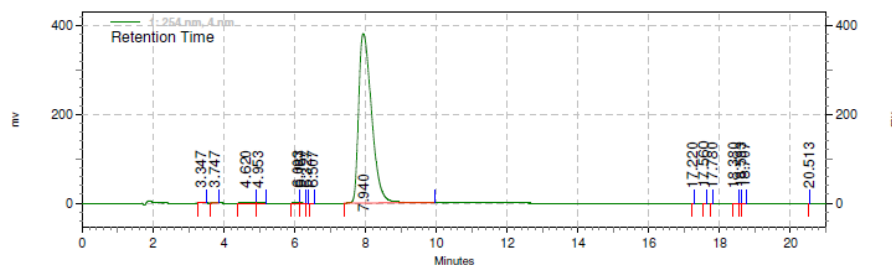

1: 254 nm, 4 nm

Results

| Retention Time | Area    | Area % | Height | Height % |
|----------------|---------|--------|--------|----------|
| 3.347          | 1320    | 0.01   | 150    | 0.04     |
| 3.747          | 664     | 0.01   | 92     | 0.02     |
| 4.620          | 8839    | 0.09   | 560    | 0.15     |
| 4.953          | 1586    | 0.02   | 163    | 0.04     |
| 6.093          | 966     | 0.01   | 125    | 0.03     |
| 6.167          | 524     | 0.01   | 91     | 0.02     |
| 6.327          | 116     | 0.00   | 54     | 0.01     |
| 6.507          | 262     | 0.00   | 55     | 0.01     |
| 7.940          | 9698072 | 99.84  | 382149 | 99.58    |
| 17.220         | 112     | 0.00   | 34     | 0.01     |
| 17.560         | 182     | 0.00   | 60     | 0.02     |
| 17.780         | 160     | 0.00   | 42     | 0.01     |
| 18.380         | 332     | 0.00   | 44     | 0.01     |
| 18.593         | 197     | 0.00   | 57     | 0.01     |
| 18.707         | 195     | 0.00   | 61     | 0.02     |
| 20.513         | 91      | 0.00   | 43     | 0.01     |

| Totals | Area    | Area % | Height | Height % |
|--------|---------|--------|--------|----------|
|        | 9713618 | 100.00 | 383780 | 100.00   |

Spectrum Max

Plot Results

| Retention Time | Area | Area % | Height | Height % |
|----------------|------|--------|--------|----------|
| 0.307          | 352  | 0.00   | 321    | 0.05     |

**Area Percent Report**  
 Page 1 of 2 Data File: C:\HPLC  
 data\Roberta\RPM1327 Chiral IPA 70 Hex 30 flow 1ml 20min.met2-26-2009 5-48-25 PM.dat  
 Acquired: 2/26/2009 5:48:49 PM Printed: 2/26/2009 6:11:39 PM

Analyst: System Vial: N/A Injection Volume: 0  
 Sample ID: RPM1327

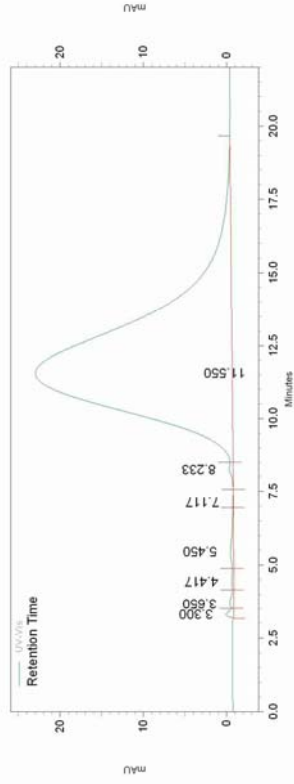

**UV-Vis Results**

| Name | Retention Time | Area  | Area Percent | Integration Codes |
|------|----------------|-------|--------------|-------------------|
|      | 3.300          | 11448 | 0.228        | BV                |
|      | 3.650          | 12001 | 0.239        | VV                |
|      | 4.417          | 8868  | 0.177        | VV                |
|      | 5.450          | 25847 | 0.516        | VV                |
|      | 7.117          | 1585  | 0.032        | VB                |

Instrument Name: HPLC  
 Acquisition Method: C:\EZStart\Projects\Default\Method\Roberta\Chiral IPA 70 Hex 30 flow 1ml 20min.met  
 Sequence: C:\HPLC data\Dan lab.seq  
 Software Version: Version 3.1.7

**Area Percent Report**  
 data\Roberta\RPM1327 Chiral IPA 70 Hex 30 flow 1ml 20min.met2-26-2009 5-48-25 PM.dat  
 Acquired: 2/26/2009 5:48:49 PM  
 Page 2 of 2 Data File: C:\HPLC  
 Printed: 2/26/2009 6:11:39 PM

8.233  
 11.550  
 13074  
 4939475  
 0.261 BV  
 98.547 VB

|        |  |         |         |
|--------|--|---------|---------|
| Totals |  | 5012298 | 100.000 |
|--------|--|---------|---------|

Instrument Name: HPLC  
 Acquisition Method: C:\EZStart\Projects\Default\Method\Roberta\Chiral IPA 70 Hex 30 flow 1ml 20min.met  
 Sequence: C:\HPLC\data\Dan\abc.seq  
 Software Version: Version 3.1.7



HPLC trace1 of (R)-14c

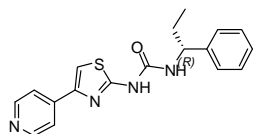

Area % Report

Data File: C:\EZChrom Elite\Enterprise\Projects\Nick Lawrence\Data\Roberta\RPM1344 MeOH 50% TFA 0.1 in H2O 50% 1ml 20 min.met 4-7-2009 11-35-25 PM  
 Method: C:\EZChrom Elite\Enterprise\Projects\Nick Lawrence\Method\Roberta\MeOH 50% TFA 0.1 in H2O 50% 1ml 20 min.met  
 Acquired: 4/7/2009 11:36:57 PM  
 Printed: 5/6/2009 5:26:28 PM

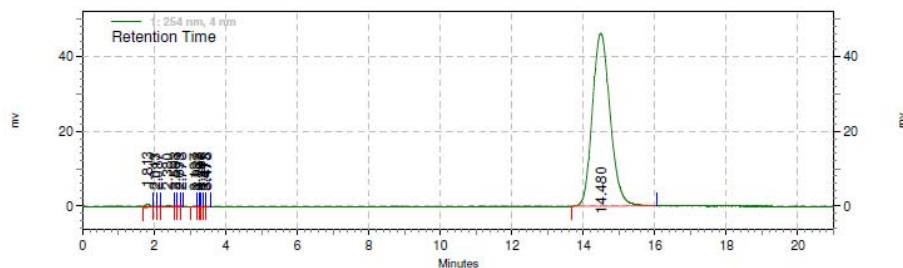

1: 254 nm, 4 nm  
 Results

| Retention Time | Area           | Area %        | Height       | Height %      |
|----------------|----------------|---------------|--------------|---------------|
| 1.813          | 6107           | 0.38          | 692          | 1.44          |
| 2.013          | 1066           | 0.07          | 183          | 0.38          |
| 2.087          | 656            | 0.04          | 139          | 0.29          |
| 2.380          | 3100           | 0.19          | 229          | 0.48          |
| 2.593          | 363            | 0.02          | 99           | 0.21          |
| 2.693          | 290            | 0.02          | 79           | 0.16          |
| 2.773          | 168            | 0.01          | 54           | 0.11          |
| 3.127          | 402            | 0.02          | 68           | 0.14          |
| 3.233          | 130            | 0.01          | 64           | 0.13          |
| 3.287          | 111            | 0.01          | 55           | 0.11          |
| 3.347          | 114            | 0.01          | 47           | 0.10          |
| 3.413          | 99             | 0.01          | 44           | 0.09          |
| 3.473          | 224            | 0.01          | 54           | 0.11          |
| 14.480         | 1595968        | 99.20         | 46189        | 96.24         |
| <b>Totals</b>  | <b>1608798</b> | <b>100.00</b> | <b>47996</b> | <b>100.00</b> |

-----  
 < General Method Parameters >  
 -----

Jasco Pumps

=====  
 Model: PU-2086  
 Control mode: Binary HPG

**Area Percent Report**  
 data\Roberta\NCDDG\Rock project\RPM1344 Chiral IPA 30 Hex 70 flow 1ml 20min.met4-3-2009 9:59:31 AM.dat  
 Acquired: 4/3/2009 10:00:02 AM  
 Page 1 of 2 Data File: C:\HPLC  
 Printed: 4/3/2009 10:33:04 AM

Analyst: System  
 Sample ID: RPM1344  
 Vial: N/A  
 Injection Volume: 0

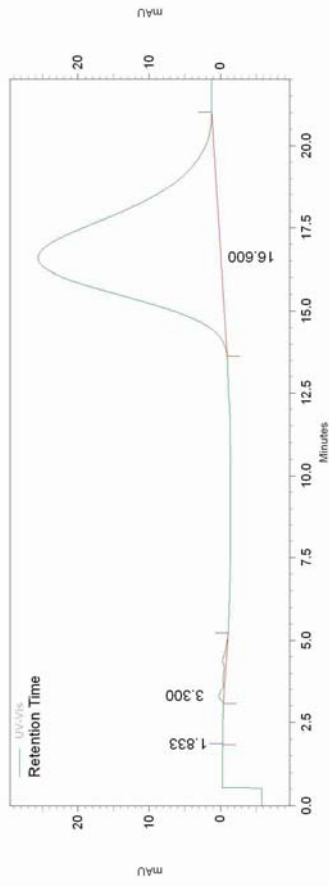

**UV-Vis Results**

| Name | Retention Time | Area    | Area Percent | Integration Codes |
|------|----------------|---------|--------------|-------------------|
|      | 1.833          | 0       | 0.000        | MM                |
|      | 3.300          | 35584   | 0.804        | MM                |
|      | 16.600         | 4392178 | 99.196       | MM                |

Totals

|                            |                                                                                    |  |  |  |
|----------------------------|------------------------------------------------------------------------------------|--|--|--|
|                            |                                                                                    |  |  |  |
| <b>Instrument Name:</b>    | <b>HPLC</b>                                                                        |  |  |  |
| <b>Acquisition Method:</b> | C:\EZStart\Projects\Default\Method\Roberta\Chiral IPA 30 Hex 70 flow 1ml 20min.met |  |  |  |
| <b>Sequence:</b>           | C:\HPLC data\Dan\abc.seq                                                           |  |  |  |

HPLC trace1 of (S)-14c

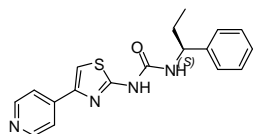

Area % Report

Data File: C:\EZChrom Elite\Enterprise\Projects\Nick Lawrence\Data\Roberta\RPM1345 MeOH 50% TFA  
 0.1 in H2O 50% 1ml 20 min.met 4-8-2009 3-21-25 AM  
 Method: C:\EZChrom Elite\Enterprise\Projects\Nick Lawrence\Method\Roberta\MeOH 50% TFA 0.1 in  
 H2O 50% 1ml 20 min.met  
 Acquired: 4/8/2009 3:22:56 AM  
 Printed: 5/6/2009 5:25:24 PM

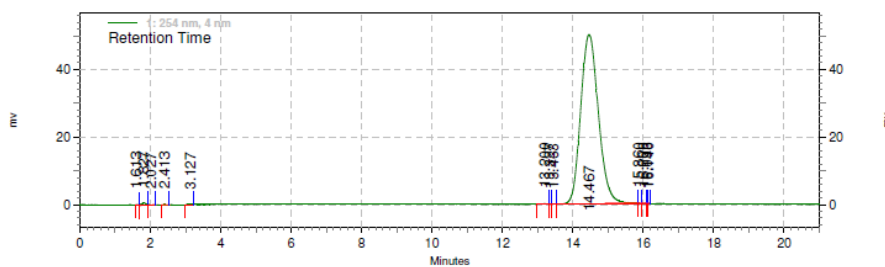

1: 254 nm, 4 nm  
 Results

| Retention Time | Area    | Area % | Height | Height % |
|----------------|---------|--------|--------|----------|
| 1.613          | 428     | 0.02   | 73     | 0.14     |
| 1.827          | 5594    | 0.32   | 635    | 1.22     |
| 2.027          | 770     | 0.04   | 99     | 0.19     |
| 2.413          | 480     | 0.03   | 77     | 0.15     |
| 3.127          | 937     | 0.05   | 116    | 0.22     |
| 13.200         | 1428    | 0.08   | 125    | 0.24     |
| 13.327         | 385     | 0.02   | 102    | 0.20     |
| 13.433         | 311     | 0.02   | 78     | 0.15     |
| 14.467         | 1756195 | 99.32  | 50200  | 96.74    |
| 15.860         | 893     | 0.05   | 153    | 0.29     |
| 16.000         | 520     | 0.03   | 93     | 0.18     |
| 16.093         | 84      | 0.00   | 81     | 0.16     |
| 16.140         | 173     | 0.01   | 58     | 0.11     |

| Totals | Area    | Area % | Height | Height % |
|--------|---------|--------|--------|----------|
|        | 1768198 | 100.00 | 51890  | 100.00   |

-----  
 ---< General Method Parameters >-----  
 -----

Jasco Pumps

=====  
 Model: PU-2086  
 Control mode: Binary HPG  
 Solvent A: 0.1 TFA in Water

**Area Percent Report**  
 data\Roberta\NCDDG\Rock project\RPM1345 Chiral IPA 30 Hex 70 flow\ml 20min.met 4-3-2009 10-58-57 AM.dat  
 Page 1 of 2 Data File: C:\HPLC  
 Acquired: 4/3/2009 10:59:16 AM  
 Printed: 4/3/2009 11:38:00 AM

Analyst: System  
 Sample ID: RPM1345  
 Vial: N/A  
 Injection Volume: 0

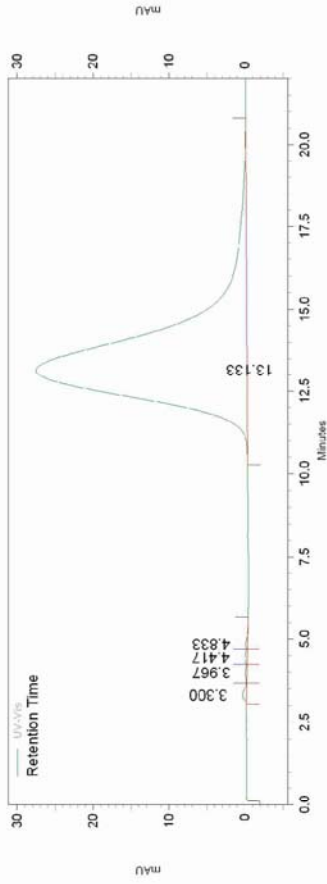

| Name | Retention Time | Area    | Area Percent | Integration Codes |
|------|----------------|---------|--------------|-------------------|
|      | 3.300          | 10366   | 0.277        | BV                |
|      | 3.967          | 4517    | 0.121        | VV                |
|      | 4.417          | 6149    | 0.164        | VV                |
|      | 4.833          | 4574    | 0.122        | VB                |
|      | 13.133         | 3722514 | 99.317       | BB                |

Instrument Name: HPLC  
 Acquisition Method: C:\EZStart\Projects\Default\Method\Roberta\Chiral IPA 30 Hex 70 flow\ml 20min.met  
 Sequence: C:\HPLC data\Dan\abc.seq  
 Software Version: Version 3.1.7

HPLC trace1 of (S)-14d

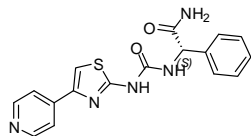

Area % Report

Data File: C:\EZChrom Elite\Enterprise\Projects\Nick Lawrence\Data\Roberta\RPM1392 CH3CN 20%  
 TFA 0.1 in H2O 80% 1ml 20 min TEMP.met 6-8-2010 11-01-16 AM.dat  
 Method: C:\EZChrom Elite\Enterprise\Projects\Nick Lawrence\Method\Roberta\MeOH 50% H2O 50%  
 1ml 20 min TEMPL.met  
 Acquired: 6/8/2010 11:03:30 AM  
 Printed: 6/10/2010 2:40:47 PM

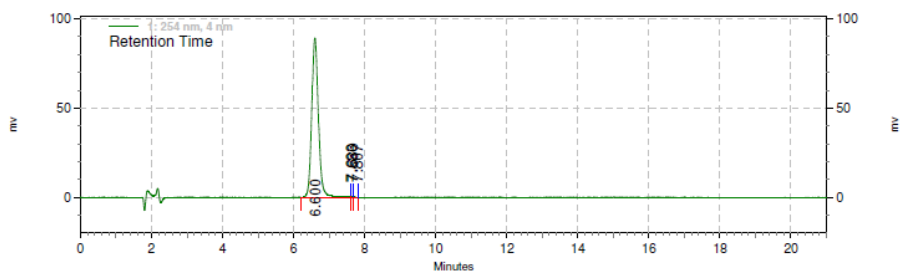

1: 254 nm, 4 nm

Results

| Retention Time | Area    | Area % | Height | Height % |
|----------------|---------|--------|--------|----------|
| 6.600          | 1166907 | 99.94  | 89257  | 99.78    |
| 7.633          | 283     | 0.02   | 101    | 0.11     |
| 7.680          | 360     | 0.03   | 95     | 0.11     |
| 7.807          | 0       | 0.00   | 0      | 0.00     |

| Totals | Area    | Area % | Height | Height % |
|--------|---------|--------|--------|----------|
|        | 1167550 | 100.00 | 89453  | 100.00   |

Spectrum Max

Plot Results

| Retention Time | Area   | Area % | Height | Height % |
|----------------|--------|--------|--------|----------|
| 0.087          | 251    | 0.01   | 407    | 0.12     |
| 0.200          | 270    | 0.01   | 331    | 0.10     |
| 0.253          | 357    | 0.01   | 136    | 0.04     |
| 0.440          | 336    | 0.01   | 216    | 0.06     |
| 0.487          | 403    | 0.02   | 153    | 0.04     |
| 0.600          | 312    | 0.01   | 155    | 0.04     |
| 0.720          | 491    | 0.02   | 343    | 0.10     |
| 0.947          | 567    | 0.02   | 108    | 0.03     |
| 1.027          | 73     | 0.00   | 81     | 0.02     |
| 1.427          | 1954   | 0.07   | 448    | 0.13     |
| 1.627          | 5210   | 0.20   | 933    | 0.27     |
| 1.813          | 518785 | 19.59  | 110370 | 31.82    |
| 2.187          | 409461 | 15.46  | 67092  | 19.34    |

## Area % Report

Data File: C:\EZChrom Elite\Enterprise\Projects\Nick Lawrence\Data\Roberta\RPM1392MeOH 40% TFA  
 0.1 in H2O 60% 1ml 20 min TEMPL.met7-30-2011 8-03-30 PM  
 Method: C:\EZChrom Elite\Enterprise\Projects\Nick Lawrence\Method\Harsukh\New-GLEPP HPLC  
 Method 0.1%H2O 0.07%CH3CN (100-0 %) 2ml 20 min 290 nm.met  
 Acquired: 7/30/2011 8:04:58 PM  
 Printed: 7/30/2011 8:32:58 PM

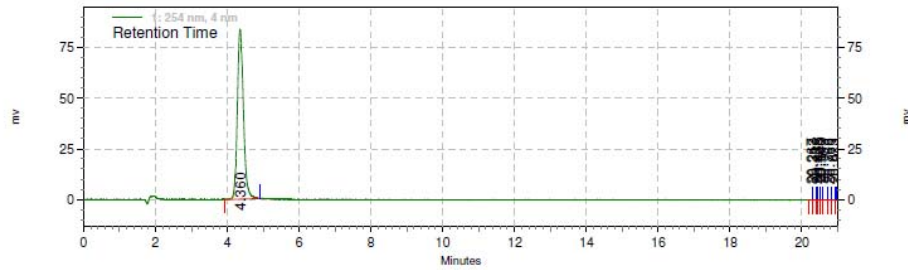

**1: 254 nm, 4 nm**  
**Results**

| Retention Time | Area           | Area %        | Height       | Height %      |
|----------------|----------------|---------------|--------------|---------------|
| 4.360          | 997818         | 99.50         | 84047        | 98.28         |
| 20.267         | 621            | 0.06          | 160          | 0.19          |
| 20.313         | 854            | 0.09          | 157          | 0.18          |
| 20.433         | 351            | 0.04          | 79           | 0.09          |
| 20.493         | 530            | 0.05          | 208          | 0.24          |
| 20.540         | 430            | 0.04          | 180          | 0.21          |
| 20.593         | 799            | 0.08          | 145          | 0.17          |
| 20.760         | 617            | 0.06          | 188          | 0.22          |
| 20.873         | 620            | 0.06          | 199          | 0.23          |
| 20.933         | 157            | 0.02          | 158          | 0.18          |
| <b>Totals</b>  | <b>1002797</b> | <b>100.00</b> | <b>85521</b> | <b>100.00</b> |

**Spectrum Max**  
**Plot Results**

| Retention Time | Area | Area % | Height | Height % |
|----------------|------|--------|--------|----------|
| 0.060          | 324  | 0.01   | 583    | 0.12     |
| 0.153          | 523  | 0.02   | 618    | 0.13     |
| 0.227          | 786  | 0.03   | 289    | 0.06     |
| 0.300          | 830  | 0.03   | 477    | 0.10     |
| 0.340          | 1412 | 0.05   | 523    | 0.11     |
| 0.473          | 3252 | 0.11   | 1026   | 0.22     |
| 0.633          | 1128 | 0.04   | 91     | 0.02     |

HPLC trace1 of (R)-14d

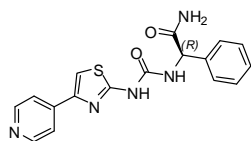

Area % Report

Data File: C:\EZChrom Elite\Enterprise\Projects\Nick Lawrence\Data\Roberta\RPM1323 CH3CN 20%  
 TFA 0.1 in H2O 80% 1ml 20 min TEMP.met 6-8-2010 10-05-42 AM.dat  
 Method: C:\EZChrom Elite\Enterprise\Projects\Nick Lawrence\Method\Roberta\MeOH 50% H2O 50%  
 1ml 20 min TEMPL.met  
 Acquired: 6/8/2010 10:07:55 AM  
 Printed: 6/10/2010 2:42:02 PM

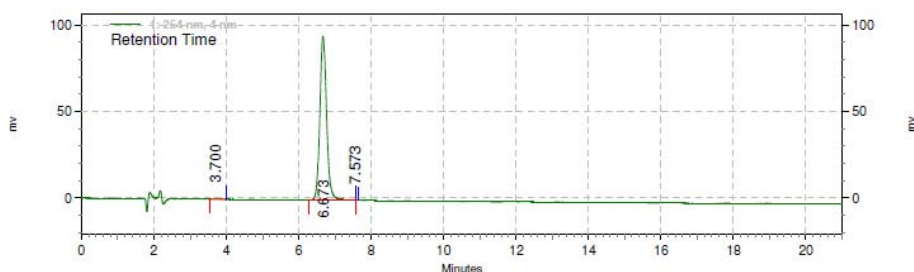

1: 254 nm, 4 nm

Results

| Retention Time | Area    | Area % | Height | Height % |
|----------------|---------|--------|--------|----------|
| 3.700          | 4628    | 0.37   | 467    | 0.49     |
| 6.673          | 1233731 | 99.61  | 94912  | 99.42    |
| 7.573          | 208     | 0.02   | 83     | 0.09     |

| Totals | Area    | Area % | Height | Height % |
|--------|---------|--------|--------|----------|
|        | 1238567 | 100.00 | 95462  | 100.00   |

Spectrum Max

Plot Results

| Retention Time | Area | Area % | Height | Height % |
|----------------|------|--------|--------|----------|
| 0.060          | 1302 | 0.05   | 564    | 0.15     |
| 0.187          | 4001 | 0.14   | 913    | 0.24     |
| 0.333          | 940  | 0.03   | 514    | 0.14     |
| 0.400          | 953  | 0.03   | 353    | 0.09     |
| 0.520          | 1915 | 0.07   | 933    | 0.25     |
| 0.573          | 711  | 0.03   | 843    | 0.22     |
| 0.620          | 469  | 0.02   | 332    | 0.09     |
| 0.693          | 1107 | 0.04   | 546    | 0.14     |
| 0.760          | 615  | 0.02   | 841    | 0.22     |
| 0.847          | 1629 | 0.06   | 685    | 0.18     |
| 0.927          | 1305 | 0.05   | 732    | 0.19     |
| 1.013          | 3540 | 0.13   | 885    | 0.23     |
| 1.080          | 1434 | 0.05   | 873    | 0.23     |
| 1.180          | 2024 | 0.07   | 913    | 0.24     |

Area % Report

Data File: C:\EZChrom Elite\Enterprise\Projects\Nick Lawrence\Data\Roberta\RPM1323 MeOH 40% TFA  
 0.1 in H2O 60% 1ml 20 min TEMPL.met 6-9-2010 10-43-45 AM.dat  
 Method: C:\EZChrom Elite\Enterprise\Projects\Nick Lawrence\Method\Roberta\MeOH 50% H2O 50%  
 1ml 20 min TEMPL.met  
 Acquired: 6/9/2010 10:45:58 AM  
 Printed: 6/10/2010 11:37:59 AM

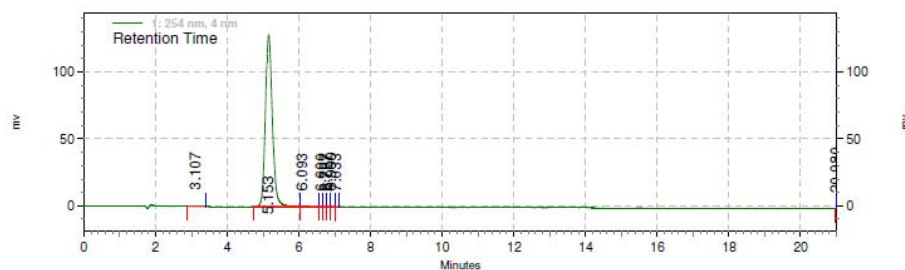

1: 254 nm, 4 nm

Results

| Retention Time | Area           | Area %        | Height        | Height %      |
|----------------|----------------|---------------|---------------|---------------|
| 3.107          | 6116           | 0.35          | 525           | 0.40          |
| 5.153          | 1753978        | 99.02         | 128282        | 98.84         |
| 6.093          | 9060           | 0.51          | 458           | 0.35          |
| 6.600          | 588            | 0.03          | 128           | 0.10          |
| 6.707          | 523            | 0.03          | 120           | 0.09          |
| 6.787          | 450            | 0.03          | 103           | 0.08          |
| 6.900          | 363            | 0.02          | 75            | 0.06          |
| 7.033          | 151            | 0.01          | 42            | 0.03          |
| 20.980         | 71             | 0.00          | 54            | 0.04          |
| <b>Totals</b>  | <b>1771300</b> | <b>100.00</b> | <b>129787</b> | <b>100.00</b> |

Spectrum Max

Plot Results

| Retention Time | Area | Area % | Height | Height % |
|----------------|------|--------|--------|----------|
| 0.100          | 3056 | 0.08   | 1151   | 0.24     |
| 0.213          | 2579 | 0.07   | 1036   | 0.22     |
| 0.313          | 2310 | 0.06   | 1044   | 0.22     |
| 0.447          | 2921 | 0.08   | 842    | 0.18     |
| 0.567          | 3989 | 0.11   | 1011   | 0.21     |
| 0.627          | 1253 | 0.03   | 690    | 0.14     |
| 0.720          | 1129 | 0.03   | 1144   | 0.24     |
| 0.913          | 2113 | 0.06   | 1382   | 0.29     |



HPLC trace of compound (S)-14e.

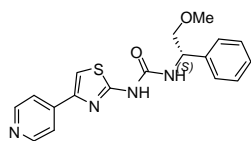

Area % Report

Data File: C:\EZChrom Elite\Enterprise\Projects\Nick Lawrence\Data\Roberta\RPM1393 CH3CN 30%  
 TFA 0.1 in H2O 70% 1ml 20 min TEMPL.met 5-13-2009 11:50-28 PM  
 Method: C:\EZChrom Elite\Enterprise\Projects\Nick Lawrence\Method\Roberta\CH3CN 30% TFA 0.1 in  
 H2O 70% 1ml 20 min TEMPL.met  
 Acquired: 5/13/2009 11:51:59 PM  
 Printed: 5/14/2009 10:23:34 AM

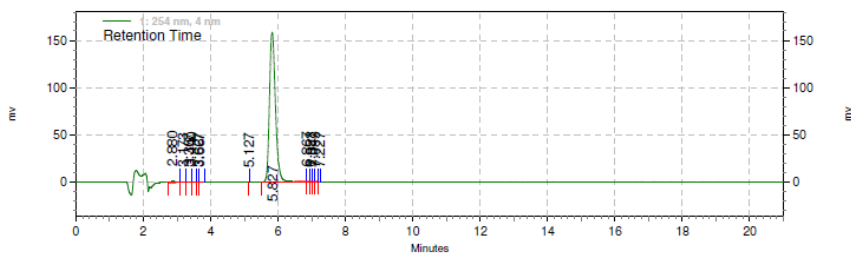

1: 254 nm, 4 nm

Results

| Retention Time | Area           | Area %        | Height        | Height %      |
|----------------|----------------|---------------|---------------|---------------|
| 2.880          | 8638           | 0.44          | 1125          | 0.70          |
| 3.173          | 931            | 0.05          | 141           | 0.09          |
| 3.367          | 941            | 0.05          | 118           | 0.07          |
| 3.440          | 627            | 0.03          | 101           | 0.06          |
| 3.627          | 176            | 0.01          | 68            | 0.04          |
| 3.667          | 314            | 0.02          | 48            | 0.03          |
| 5.127          | 29             | 0.00          | 36            | 0.02          |
| 5.827          | 1960718        | 99.35         | 158670        | 98.76         |
| 6.867          | 431            | 0.02          | 102           | 0.06          |
| 6.953          | 385            | 0.02          | 96            | 0.06          |
| 7.047          | 151            | 0.01          | 65            | 0.04          |
| 7.093          | 185            | 0.01          | 65            | 0.04          |
| 7.227          | 58             | 0.00          | 34            | 0.02          |
| <b>Totals</b>  | <b>1973584</b> | <b>100.00</b> | <b>160669</b> | <b>100.00</b> |

Spectrum Max

Plot Results

| Retention Time | Area | Area % | Height | Height % |
|----------------|------|--------|--------|----------|
| 0.093          | 243  | 0.00   | 241    | 0.03     |
| 0.180          | 478  | 0.01   | 214    | 0.03     |
| 0.313          | 643  | 0.01   | 210    | 0.03     |
| 0.460          | 392  | 0.01   | 161    | 0.02     |

# HPLC trace of (R)-14e

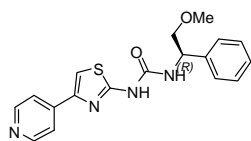

## Area % Report

Data File: C:\EZChrom Elite\Enterprise\Projects\Nick Lawrence\Data\Roberta\RPM1394 CH3CN 30%  
 TFA 0.1 in H2O 70% 1ml 20 min TEMPL.met 5-14-2009 12-35-40 AM  
 Method: C:\EZChrom Elite\Enterprise\Projects\Nick Lawrence\Method\Roberta\CH3CN 30% TFA 0.1 in  
 H2O 70% 1ml 20 min TEMPL.met  
 Acquired: 5/14/2009 12:37:12 AM  
 Printed: 5/14/2009 10:24:53 AM

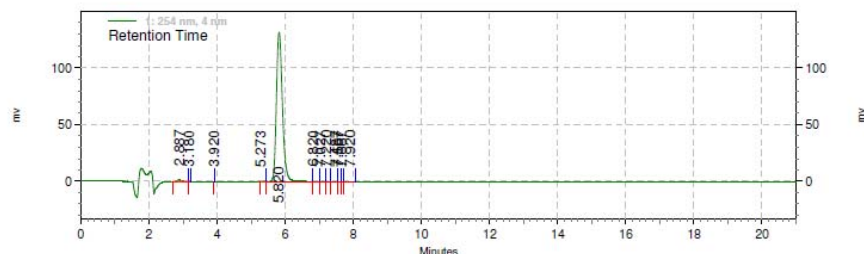

### 1: 254 nm, 4 nm Results

| Retention Time | Area    | Area % | Height | Height % |
|----------------|---------|--------|--------|----------|
| 2.887          | 11137   | 0.68   | 1469   | 1.09     |
| 3.180          | 209     | 0.01   | 63     | 0.05     |
| 3.920          | 29      | 0.00   | 22     | 0.02     |
| 5.273          | 244     | 0.01   | 33     | 0.02     |
| 5.820          | 1617529 | 98.90  | 131846 | 98.24    |
| 6.820          | 1743    | 0.11   | 178    | 0.13     |
| 7.027          | 1233    | 0.08   | 141    | 0.11     |
| 7.220          | 812     | 0.05   | 116    | 0.09     |
| 7.487          | 1010    | 0.06   | 113    | 0.08     |
| 7.567          | 356     | 0.02   | 83     | 0.06     |
| 7.667          | 250     | 0.02   | 61     | 0.05     |
| 7.920          | 1015    | 0.06   | 84     | 0.06     |

| Totals | Area    | Area % | Height | Height % |
|--------|---------|--------|--------|----------|
|        | 1635567 | 100.00 | 134209 | 100.00   |

### Spectrum Max Plot Results

| Retention Time | Area | Area % | Height | Height % |
|----------------|------|--------|--------|----------|
| 0.507          | 113  | 0.00   | 59     | 0.01     |
| 0.720          | 435  | 0.01   | 169    | 0.02     |
| 0.847          | 288  | 0.00   | 231    | 0.03     |
| 0.933          | 572  | 0.01   | 252    | 0.03     |
| 1.027          | 414  | 0.01   | 446    | 0.06     |

# HPLC trace1 of (R)-14f

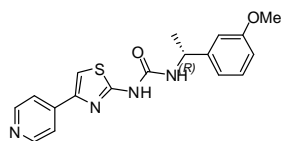

Page 1 of 4

## Area % Report

Data File: C:\EZChrom Elite\Enterprise\Projects\Nick Lawrence\Data\Roberta\RPM1342 MeOH 50% TFA  
 0.1 in H2O 50% 1ml 20 min.met 4-8-2009 12-32-36 PM.dat  
 Method: C:\EZChrom Elite\Enterprise\Projects\Nick Lawrence\Method\Roberta\MeOH 50% TFA 0.1 in  
 H2O 50% 1ml 20 min.met  
 Acquired: 4/8/2009 12:34:53 PM  
 Printed: 5/6/2009 5:24:02 PM

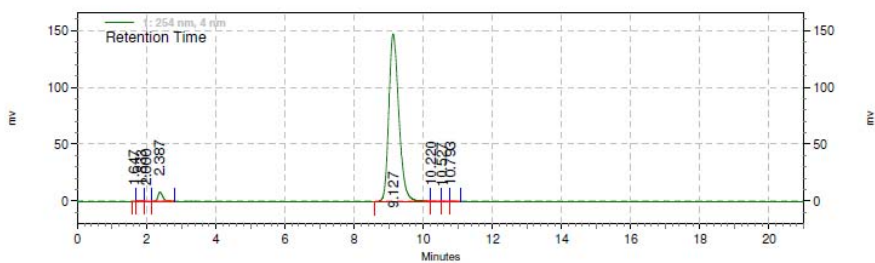

### 1: 254 nm, 4 nm Results

| Retention Time | Area    | Area % | Height | Height % |
|----------------|---------|--------|--------|----------|
| 1.647          | 500     | 0.02   | 137    | 0.09     |
| 1.833          | 7167    | 0.23   | 739    | 0.47     |
| 2.000          | 1877    | 0.06   | 203    | 0.13     |
| 2.387          | 79944   | 2.59   | 8149   | 5.18     |
| 9.127          | 2984859 | 96.84  | 147330 | 93.68    |
| 10.220         | 5051    | 0.16   | 431    | 0.27     |
| 10.527         | 1899    | 0.06   | 192    | 0.12     |
| 10.793         | 1047    | 0.03   | 94     | 0.06     |

| Totals | Area    | Area % | Height | Height % |
|--------|---------|--------|--------|----------|
|        | 3082344 | 100.00 | 157275 | 100.00   |

### ---< General Method Parameters >---

#### Jasco Pumps

=====  
 Model: PU-2086  
 Control mode: Binary HPG  
 Solvent A: 0.1 TFA in Water  
 Solvent B: MeOH  
 Solvent C: N/A  
 Solvent D: N/A  
 Pressure range  
 Min. pressure: 3.0 MPa

Area % Report

Data File: C:\EZChrom Elite\Enterprise\Projects\Nick Lawrence\Data\Roberta\RPM1342 CH3CN 30%  
 TFA 0.1 in H2O 70% 1ml 20 min TEMPL.met 5-13-2009 8-04-22 PM  
 Method: C:\EZChrom Elite\Enterprise\Projects\Nick Lawrence\Method\Roberta\CH3CN 30% TFA 0.1 in  
 H2O 70% 1ml 20 min TEMPL.met  
 Acquired: 5/13/2009 8:05:53 PM  
 Printed: 5/14/2009 10:12:53 AM

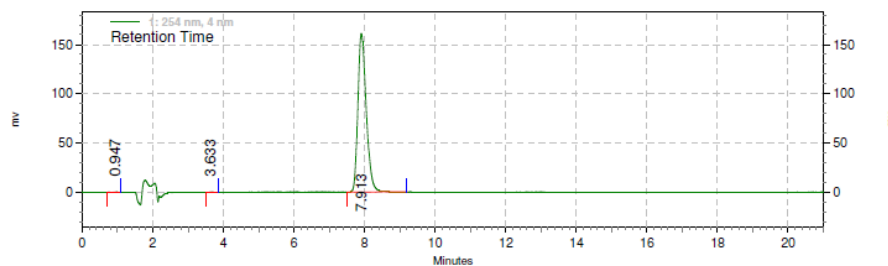

1: 254 nm, 4 nm

Results

| Retention Time | Area    | Area % | Height | Height % |
|----------------|---------|--------|--------|----------|
| 0.947          | 1069    | 0.04   | 104    | 0.06     |
| 3.633          | 1102    | 0.04   | 114    | 0.07     |
| 7.913          | 2659574 | 99.92  | 161196 | 99.86    |

| Totals | Area    | Area % | Height | Height % |
|--------|---------|--------|--------|----------|
|        | 2661745 | 100.00 | 161414 | 100.00   |

Spectrum Max  
Plot Results

| Retention Time | Area    | Area % | Height | Height % |
|----------------|---------|--------|--------|----------|
| 0.253          | 372     | 0.00   | 327    | 0.04     |
| 0.487          | 740     | 0.01   | 288    | 0.03     |
| 0.573          | 497     | 0.01   | 248    | 0.03     |
| 0.620          | 18      | 0.00   | 0      | 0.00     |
| 0.880          | 2010    | 0.02   | 799    | 0.09     |
| 1.007          | 9961    | 0.10   | 2127   | 0.23     |
| 1.047          | 13511   | 0.14   | 2357   | 0.25     |
| 1.160          | 31546   | 0.33   | 3379   | 0.36     |
| 1.287          | 20182   | 0.21   | 4614   | 0.49     |
| 1.380          | 27780   | 0.29   | 5476   | 0.59     |
| 1.600          | 1186440 | 12.31  | 235266 | 25.22    |
| 1.780          | 200045  | 2.08   | 20193  | 2.16     |
| 2.087          | 2803435 | 29.08  | 280094 | 30.02    |
| 2.407          | 24888   | 0.26   | 2399   | 0.26     |

**Area Percent Report**  
 data\Roberta\NCDDG\Rock project\RPM1342 Chiral IPA 40 Hex 60 flow\ml 60min.met 4-30-2009 2-18-44 PM.dat  
 Page 1 of 2 Data File: C:\HPLC  
 Acquired: 4/30/2009 2:19:19 PM Printed: 5/6/2009 11:40:42 AM

Analyst: System Vial: N/A Injection Volume: 0  
 Sample ID: RPM1342

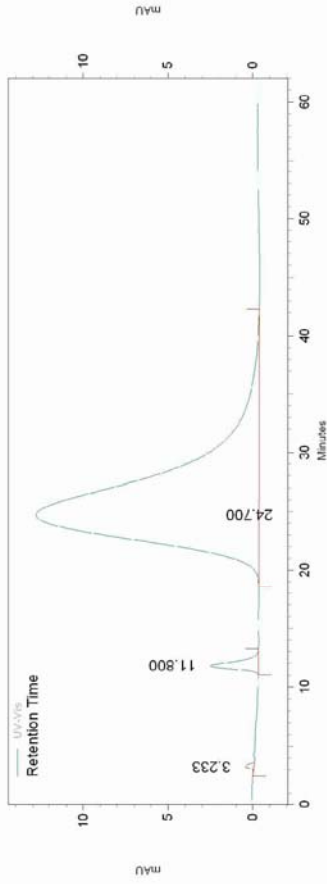

**UV-Vis Results**

| Name | Retention Time | Area    | Area Percent | Integration Codes |
|------|----------------|---------|--------------|-------------------|
|      | 3.233          | 11348   | 0.225 MM     |                   |
|      | 11.800         | 120890  | 2.402 MM     |                   |
|      | 24.700         | 4900649 | 97.373 MM    |                   |

Totals

|                                                                                                       |  |                                 |  |
|-------------------------------------------------------------------------------------------------------|--|---------------------------------|--|
| Instrument Name: HPLC                                                                                 |  | Software Version: Version 3.1.7 |  |
| Acquisition Method: C:\EZStart\Projects\Default\Method\Roberta\Chiral IPA 40 Hex 60 flow\ml 60min.met |  |                                 |  |
| Sequence: C:\HPLC data\Dan\abc.seq                                                                    |  |                                 |  |

HPLC1 trace of (S)-14f

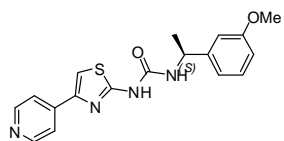

Area % Report

Data File: C:\EZChrom Elite\Enterprise\Projects\Nick Lawrence\Data\Roberta\RPM1340 MeOH 50% TFA 0.1 in H2O 50% 1ml 20 min.met 4-8-2009 1-05-50 AM  
 Method: C:\EZChrom Elite\Enterprise\Projects\Nick Lawrence\Method\Roberta\MeOH 50% TFA 0.1 in H2O 50% 1ml 20 min.met  
 Acquired: 4/8/2009 1:07:21 AM  
 Printed: 5/6/2009 5:20:10 PM

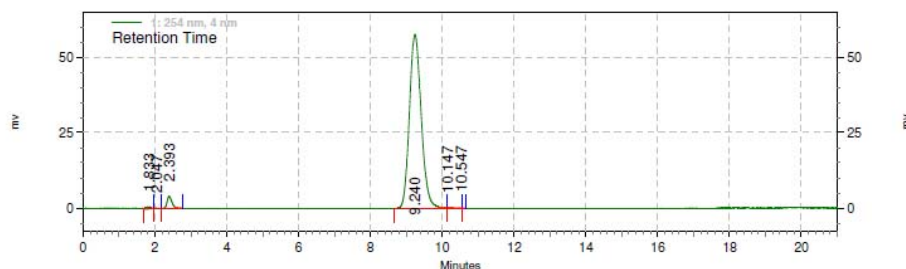

1: 254 nm, 4 nm

Results

| Retention Time | Area    | Area % | Height | Height % |
|----------------|---------|--------|--------|----------|
| 1.833          | 6251    | 0.45   | 685    | 1.09     |
| 2.047          | 1779    | 0.13   | 160    | 0.25     |
| 2.393          | 39075   | 2.84   | 4010   | 6.38     |
| 9.240          | 1324126 | 96.33  | 57687  | 91.80    |
| 10.147         | 3136    | 0.23   | 240    | 0.38     |
| 10.547         | 241     | 0.02   | 57     | 0.09     |

| Totals | Area    | Area % | Height | Height % |
|--------|---------|--------|--------|----------|
|        | 1374608 | 100.00 | 62839  | 100.00   |

---< General Method Parameters >---

Jasco Pumps

=====  
 Model: PU-2086  
 Control mode: Binary HPG  
 Solvent A: 0.1 TFA in Water  
 Solvent B: MeOH  
 Solvent C: N/A  
 Solvent D: N/A  
 Pressure range  
 Min. pressure: 3.0 MPa  
 Max. pressure: 50.0 MPa

Area % Report

Data File: C:\EZChrom Elite\Enterprise\Projects\Nick Lawrence\Data\Roberta\RPM1340 CH3CN 30%  
 TFA 0.1 in H2O 70% 1ml 20 min TEMPL.met 5-13-2009 8-49-34 PM  
 Method: C:\EZChrom Elite\Enterprise\Projects\Nick Lawrence\Method\Roberta\CH3CN 30% TFA 0.1 in  
 H2O 70% 1ml 20 min TEMPL.met  
 Acquired: 5/13/2009 8:51:07 PM  
 Printed: 5/14/2009 10:18:02 AM

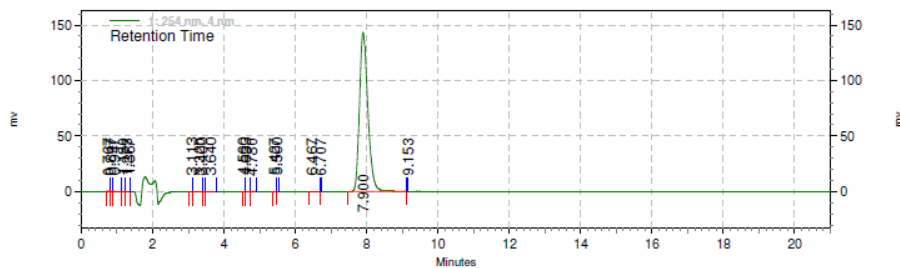

1: 254 nm, 4 nm  
 Results

| Retention Time | Area           | Area %        | Height        | Height %      |
|----------------|----------------|---------------|---------------|---------------|
| 0.767          | 328            | 0.01          | 75            | 0.05          |
| 0.847          | 150            | 0.01          | 52            | 0.04          |
| 0.947          | 1019           | 0.04          | 113           | 0.08          |
| 1.180          | 423            | 0.02          | 92            | 0.06          |
| 1.273          | 218            | 0.01          | 52            | 0.04          |
| 1.367          | 0              | 0.00          | 0             | 0.00          |
| 3.113          | 150            | 0.01          | 46            | 0.03          |
| 3.320          | 1055           | 0.04          | 104           | 0.07          |
| 3.400          | 186            | 0.01          | 67            | 0.05          |
| 3.640          | 1149           | 0.05          | 113           | 0.08          |
| 4.560          | 88             | 0.00          | 49            | 0.03          |
| 4.633          | 273            | 0.01          | 62            | 0.04          |
| 4.780          | 200            | 0.01          | 51            | 0.04          |
| 5.427          | 166            | 0.01          | 54            | 0.04          |
| 5.500          | 97             | 0.00          | 47            | 0.03          |
| 6.467          | 698            | 0.03          | 79            | 0.05          |
| 6.707          | 36             | 0.00          | 46            | 0.03          |
| 7.900          | 2343361        | 99.73         | 143101        | 99.22         |
| 9.153          | 25             | 0.00          | 29            | 0.02          |
| <b>Totals</b>  | <b>2349622</b> | <b>100.00</b> | <b>144232</b> | <b>100.00</b> |

**Area Percent Report**  
 data\Roberta\NCDD\G:\Rock\project\RPM1340 Chiral IPA 40 Hex 60 flow\ml 60min.met 4-29-2009 1-21-10 PM.dat  
 Page 1 of 2 Data File: C:\HPLC  
 Acquired: 4/29/2009 1:21:59 PM  
 Printed: 4/29/2009 2:27:37 PM

Analyst: System  
 Sample ID: RPM1340  
 Vial: N/A  
 Injection Volume: 0

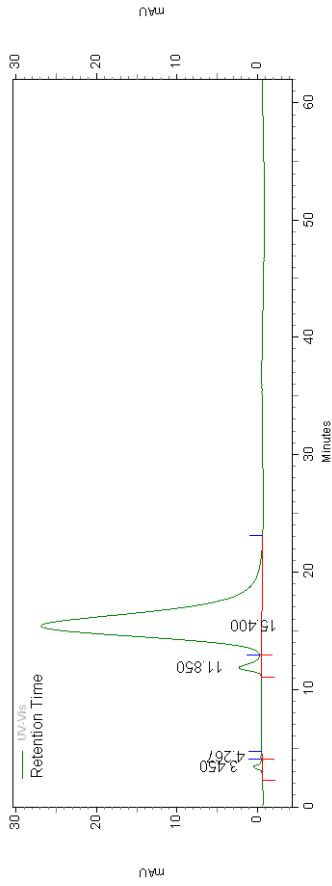

| Name | Retention Time | Area    | Area Percent | Integration Codes |
|------|----------------|---------|--------------|-------------------|
|      | 3.450          | 30455   | 0.712        | BV                |
|      | 4.267          | 3548    | 0.083        | VB                |
|      | 11.850         | 123422  | 2.885        | BV                |
|      | 15.400         | 4120531 | 96.320       | VB                |

Instrument Name: HPLC  
 Acquisition Method: C:\EZStart\Projects\Default\Method\Roberta\Chiral IPA 40 Hex 60 flow\ml 60min.met  
 Sequence: C:\HPLC\data\Dan\abc.seq  
 Software Version: Version 3.1.7



# Area Percent Report

Page 2 of 2 Data File: C:\HPLC  
data\Roberta\NCDDG\Kock project\RPNI340 Chiral IPA 40 Hex 60 Row1ml 60min.met+29-2009 1-21-10 PMA.dat

Acquired: 4/29/2009 1:21:59 PM  
Printed: 4/29/2009 2:27:37 PM

|        |  |         |         |  |
|--------|--|---------|---------|--|
| Totals |  | 4277956 | 100.000 |  |
|--------|--|---------|---------|--|

Instrument Name: HPLC      Software Version: Version 3.1.7  
Acquisition Method: C:\EZStart\Projects\Default\Method\Roberta\Chiral IPA 40 Hex 60 Row1ml 60min.met  
Sequence: C:\HPLC\data\Dan\abc.seq

# HPLC trace1 of (R)-14g

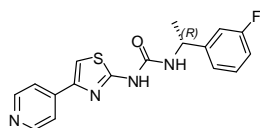

## Area % Report

Data File: C:\EZChrom Elite\Enterprise\Projects\Nick Lawrence\Data\Roberta\RPM1472 CH3CN 30% TFA 0.1 in H2O 70% 1ml 20 min TEMP.met 9-29-2009 10-18-46 PM  
 Method: C:\EZChrom Elite\Enterprise\Projects\Nick Lawrence\Method\Roberta\CH3CN 30% TFA 0.1 in H2O 70% 1ml 20 min TEMP.met  
 Acquired: 9/29/2009 10:20:15 PM  
 Printed: 9/30/2009 9:36:46 AM

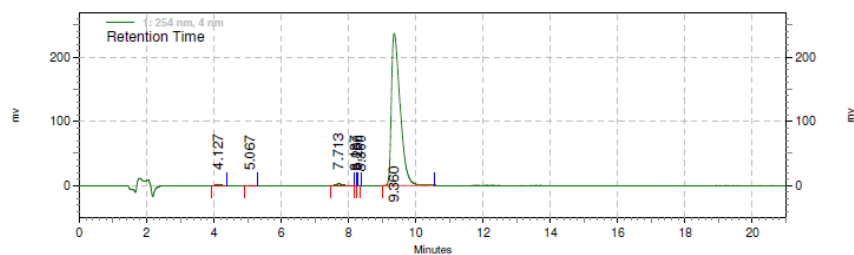

### 1: 254 nm, 4 nm Results

| Retention Time | Area    | Area % | Height | Height % |
|----------------|---------|--------|--------|----------|
| 4.127          | 18491   | 0.43   | 2137   | 0.88     |
| 5.067          | 2152    | 0.05   | 208    | 0.09     |
| 7.713          | 36930   | 0.85   | 2802   | 1.16     |
| 8.187          | 92      | 0.00   | 43     | 0.02     |
| 8.260          | 52      | 0.00   | 39     | 0.02     |
| 8.360          | 19      | 0.00   | 24     | 0.01     |
| 9.360          | 4272271 | 98.67  | 236421 | 97.83    |
| <b>Totals</b>  |         |        |        |          |
|                | 4330007 | 100.00 | 241674 | 100.00   |

### Spectrum Max Plot Results

| Retention Time | Area  | Area % | Height | Height % |
|----------------|-------|--------|--------|----------|
| 0.087          | 124   | 0.00   | 41     | 0.00     |
| 0.147          | 320   | 0.00   | 70     | 0.01     |
| 0.260          | 0     | 0.00   | 0      | 0.00     |
| 0.440          | 1629  | 0.02   | 277    | 0.03     |
| 0.573          | 4477  | 0.05   | 952    | 0.12     |
| 0.660          | 6677  | 0.07   | 1421   | 0.17     |
| 0.740          | 6209  | 0.06   | 2002   | 0.24     |
| 0.807          | 14964 | 0.15   | 2159   | 0.26     |
| 0.900          | 33072 | 0.33   | 2903   | 0.35     |
| 1.067          | 20746 | 0.21   | 3564   | 0.43     |

Area % Report

Data File: C:\EZChrom Elite\Enterprise\Projects\Nick Lawrence\Data\Roberta\RPM1472 MeOH 50% TFA 0.1 in H2O 50% 1ml 20 min TEMPL.met 9-30-2009 10-33-25 PM  
 Method: C:\EZChrom Elite\Enterprise\Projects\Nick Lawrence\Method\Roberta\MeOH 50% TFA 0.1 in H2O 50% 1ml 20 min TEMPL.met  
 Acquired: 9/30/2009 10:34:56 PM  
 Printed: 10/1/2009 9:48:56 AM

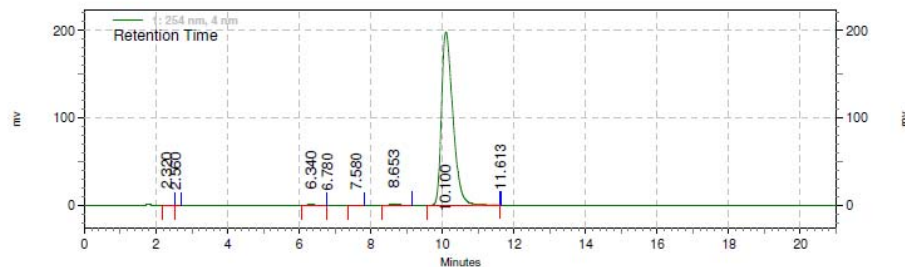

1: 254 nm, 4 nm

Results

| Retention Time | Area           | Area %        | Height        | Height %      |
|----------------|----------------|---------------|---------------|---------------|
| 2.320          | 1695           | 0.04          | 144           | 0.07          |
| 2.560          | 203            | 0.00          | 33            | 0.02          |
| 6.340          | 18566          | 0.42          | 1178          | 0.58          |
| 6.780          | 0              | 0.00          | 0             | 0.00          |
| 7.580          | 1523           | 0.03          | 113           | 0.06          |
| 8.653          | 36893          | 0.83          | 2031          | 1.01          |
| 10.100         | 4396941        | 98.68         | 198100        | 98.23         |
| 11.613         | 82             | 0.00          | 67            | 0.03          |
| <b>Totals</b>  | <b>4455903</b> | <b>100.00</b> | <b>201666</b> | <b>100.00</b> |

Spectrum Max

Plot Results

| Retention Time | Area | Area % | Height | Height % |
|----------------|------|--------|--------|----------|
| 0.267          | 102  | 0.00   | 255    | 0.06     |
| 0.367          | 227  | 0.00   | 386    | 0.10     |
| 0.493          | 501  | 0.01   | 351    | 0.09     |
| 0.573          | 276  | 0.00   | 255    | 0.06     |
| 0.653          | 506  | 0.01   | 424    | 0.11     |
| 0.807          | 443  | 0.01   | 340    | 0.09     |
| 0.860          | 302  | 0.01   | 405    | 0.10     |
| 0.947          | 360  | 0.01   | 382    | 0.10     |
| 1.000          | 228  | 0.00   | 447    | 0.11     |

HPLC trace1 of (S)-14g

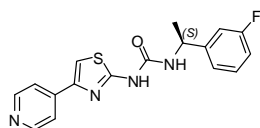

Area % Report

Data File: C:\EZChrom Elite\Enterprise\Projects\Nick Lawrence\Data\Roberta\RPM1479 CH3CN 30%  
 TFA 0.1 in H2O 70% 1ml 20 min TEMP.met 9-29-2009 9-33-33 PM  
 Method: C:\EZChrom Elite\Enterprise\Projects\Nick Lawrence\Method\Roberta\CH3CN 30% TFA 0.1 in  
 H2O 70% 1ml 20 min TEMP.met  
 Acquired: 9/29/2009 9:35:04 PM  
 Printed: 9/30/2009 9:35:19 AM

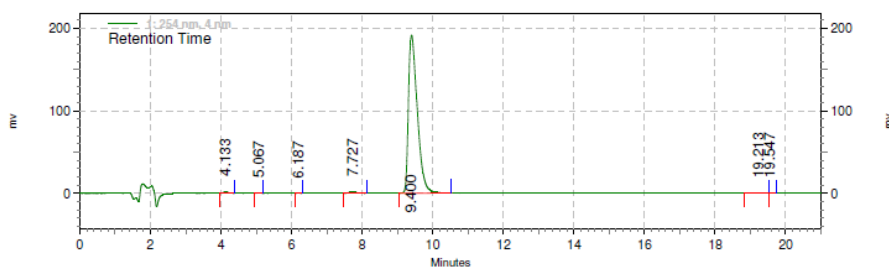

1: 254 nm, 4 nm  
 Results

| Retention Time | Area    | Area % | Height | Height % |
|----------------|---------|--------|--------|----------|
| 4.133          | 16767   | 0.49   | 1935   | 0.98     |
| 5.067          | 1375    | 0.04   | 167    | 0.08     |
| 6.187          | 969     | 0.03   | 128    | 0.07     |
| 7.727          | 28929   | 0.85   | 2188   | 1.11     |
| 9.400          | 3352751 | 98.43  | 191916 | 97.60    |
| 19.213         | 4909    | 0.14   | 202    | 0.10     |
| 19.547         | 622     | 0.02   | 104    | 0.05     |

| Totals | Area    | Area % | Height | Height % |
|--------|---------|--------|--------|----------|
| Totals | 3406322 | 100.00 | 196640 | 100.00   |

Spectrum Max  
 Plot Results

| Retention Time | Area    | Area % | Height | Height % |
|----------------|---------|--------|--------|----------|
| 0.293          | 8161    | 0.09   | 634    | 0.09     |
| 0.487          | 9387    | 0.11   | 1434   | 0.20     |
| 0.553          | 6067    | 0.07   | 1671   | 0.23     |
| 0.687          | 13999   | 0.16   | 2267   | 0.31     |
| 0.807          | 26949   | 0.31   | 2840   | 0.39     |
| 0.967          | 43605   | 0.50   | 3529   | 0.49     |
| 1.107          | 12903   | 0.15   | 4067   | 0.56     |
| 1.160          | 37092   | 0.43   | 4278   | 0.59     |
| 1.613          | 1236899 | 14.19  | 145170 | 19.99    |
| 1.787          | 190136  | 2.18   | 18330  | 2.52     |

## Area % Report

Data File: C:\EZChrom Elite\Enterprise\Projects\Nick Lawrence\Data\Roberta\RPM1479 MeOH 50% TFA 0.1 in H2O 50% 1ml 20 min TEMPL.met 9-30-2009 9-48-12 PM  
Method: C:\EZChrom Elite\Enterprise\Projects\Nick Lawrence\Method\Roberta\MeOH 50% TFA 0.1 in H2O 50% 1ml 20 min TEMPL.met  
Acquired: 9/30/2009 9:49:43 PM  
Printed: 10/1/2009 9:47:33 AM

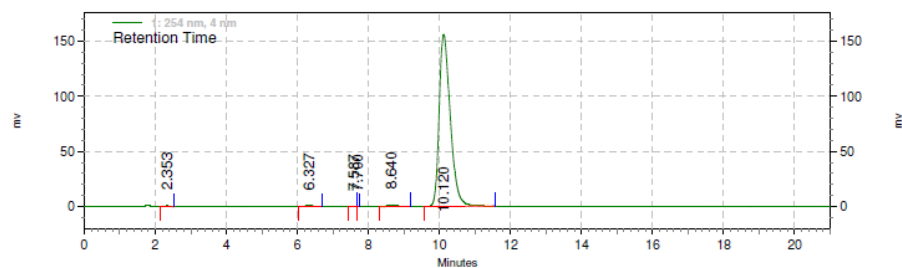**1: 254 nm, 4 nm  
Results**

| Retention Time | Area    | Area % | Height | Height % |
|----------------|---------|--------|--------|----------|
| 2.353          | 7933    | 0.23   | 637    | 0.40     |
| 6.327          | 15885   | 0.46   | 1050   | 0.66     |
| 7.587          | 886     | 0.03   | 86     | 0.05     |
| 7.700          | 239     | 0.01   | 91     | 0.06     |
| 8.640          | 30288   | 0.88   | 1660   | 1.04     |
| 10.120         | 3396139 | 98.40  | 155966 | 97.79    |
| <b>Totals</b>  |         |        |        |          |
|                | 3451370 | 100.00 | 159490 | 100.00   |

**Spectrum Max  
Plot Results**

| Retention Time | Area | Area % | Height | Height % |
|----------------|------|--------|--------|----------|
| 0.093          | 592  | 0.01   | 595    | 0.12     |
| 0.220          | 1493 | 0.03   | 805    | 0.17     |
| 0.273          | 1787 | 0.04   | 765    | 0.16     |
| 0.347          | 1016 | 0.02   | 400    | 0.08     |
| 0.480          | 3030 | 0.06   | 1374   | 0.29     |
| 0.560          | 1660 | 0.03   | 830    | 0.17     |
| 0.633          | 1778 | 0.03   | 702    | 0.15     |
| 0.787          | 6209 | 0.12   | 943    | 0.20     |
| 0.940          | 1507 | 0.03   | 906    | 0.19     |
| 1.007          | 2916 | 0.06   | 1039   | 0.22     |
| 1.080          | 1674 | 0.03   | 797    | 0.17     |

# HPLC trace1 of (RS)-14g

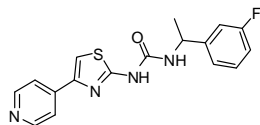

## Area % Report

Data File: C:\EZChrom Elite\Enterprise\Projects\Nick Lawrence\Data\Roberta\RPM1470 CH3CN 30%  
 TFA 0.1 in H2O 70% 1ml 20 min TEMP.met 9-29-2009 11-03-55 PM  
 Method: C:\EZChrom Elite\Enterprise\Projects\Nick Lawrence\Method\Roberta\CH3CN 30% TFA 0.1 in  
 H2O 70% 1ml 20 min TEMP.met  
 Acquired: 9/29/2009 11:05:26 PM  
 Printed: 9/30/2009 9:39:59 AM

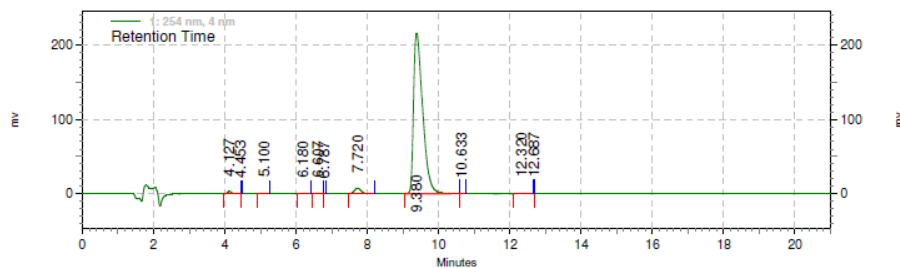

### 1: 254 nm, 4 nm Results

| Retention Time | Area    | Area % | Height | Height % |
|----------------|---------|--------|--------|----------|
| 4.127          | 29515   | 0.74   | 3338   | 1.47     |
| 4.453          | 62      | 0.00   | 57     | 0.03     |
| 5.100          | 1825    | 0.05   | 191    | 0.08     |
| 6.180          | 1742    | 0.04   | 174    | 0.08     |
| 6.607          | 1425    | 0.04   | 135    | 0.06     |
| 6.787          | 138     | 0.00   | 55     | 0.02     |
| 7.720          | 101132  | 2.55   | 7758   | 3.41     |
| 9.380          | 3831901 | 96.45  | 215685 | 94.69    |
| 10.633         | 541     | 0.01   | 112    | 0.05     |
| 12.320         | 4756    | 0.12   | 268    | 0.12     |
| 12.687         | 6       | 0.00   | 0      | 0.00     |

| Totals | Area    | Area % | Height | Height % |
|--------|---------|--------|--------|----------|
|        | 3973043 | 100.00 | 227773 | 100.00   |

### Spectrum Max Plot Results

| Retention Time | Area  | Area % | Height | Height % |
|----------------|-------|--------|--------|----------|
| 0.273          | 1999  | 0.02   | 410    | 0.04     |
| 0.353          | 2503  | 0.02   | 762    | 0.08     |
| 0.407          | 5297  | 0.05   | 1026   | 0.11     |
| 0.567          | 15236 | 0.15   | 1931   | 0.21     |
| 0.653          | 9614  | 0.10   | 2686   | 0.29     |
| 0.707          | 3779  | 0.04   | 2424   | 0.27     |

Area % Report

Data File: C:\EZChrom Elite\Enterprise\Projects\Nick Lawrence\Data\Roberta\RPM1470 MeOH 50% TFA  
 0.1 in H2O 50% 1ml 20 min TEMPL.met 9-30-2009 11-18-37 PM  
 Method: C:\EZChrom Elite\Enterprise\Projects\Nick Lawrence\Method\Roberta\MeOH 50% TFA 0.1 in  
 H2O 50% 1ml 20 min TEMPL.met  
 Acquired: 9/30/2009 11:20:08 PM  
 Printed: 10/1/2009 9:51:07 AM

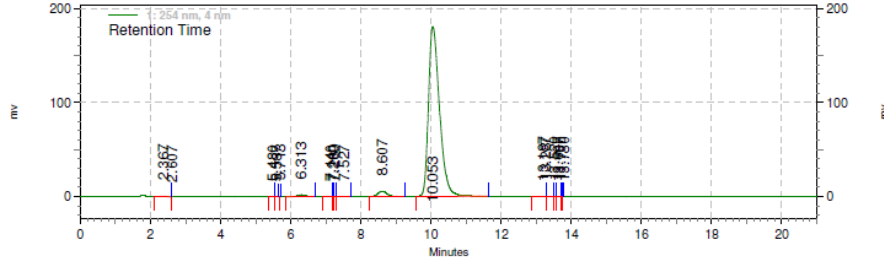

1: 254 nm, 4 nm  
 Results

| Retention Time | Area           | Area %        | Height        | Height %      |
|----------------|----------------|---------------|---------------|---------------|
| 2.367          | 7793           | 0.19          | 626           | 0.33          |
| 2.607          | 0              | 0.00          | 0             | 0.00          |
| 5.480          | 396            | 0.01          | 57            | 0.03          |
| 5.587          | 206            | 0.01          | 57            | 0.03          |
| 5.713          | 65             | 0.00          | 44            | 0.02          |
| 6.313          | 30572          | 0.75          | 1936          | 1.02          |
| 7.140          | 838            | 0.02          | 97            | 0.05          |
| 7.200          | 194            | 0.00          | 91            | 0.05          |
| 7.260          | 111            | 0.00          | 55            | 0.03          |
| 7.527          | 1471           | 0.04          | 115           | 0.06          |
| 8.607          | 104801         | 2.56          | 5728          | 3.02          |
| 10.053         | 3943576        | 96.30         | 180499        | 95.06         |
| 13.187         | 3153           | 0.08          | 211           | 0.11          |
| 13.287         | 1562           | 0.04          | 179           | 0.09          |
| 13.520         | 150            | 0.00          | 62            | 0.03          |
| 13.607         | 271            | 0.01          | 56            | 0.03          |
| 13.700         | 95             | 0.00          | 49            | 0.03          |
| 13.780         | 13             | 0.00          | 15            | 0.01          |
| <b>Totals</b>  | <b>4095267</b> | <b>100.00</b> | <b>189877</b> | <b>100.00</b> |

Spectrum Max  
 Plot Results

# HPLC trace1 of (R)-14h

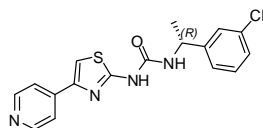

## Area % Report

Data File: C:\EZChrom Elite\Enterprise\Projects\Nick Lawrence\Data\Roberta\RPM1474 CH3CN 30%  
 TFA 0.1 in H2O 70% 1ml 20 min TEMP.met 9-30-2009 12-34-17 AM  
 Method: C:\EZChrom Elite\Enterprise\Projects\Nick Lawrence\Method\Roberta\CH3CN 30% TFA 0.1 in  
 H2O 70% 1ml 20 min TEMP.met  
 Acquired: 9/30/2009 12:35:49 AM  
 Printed: 9/30/2009 9:46:05 AM

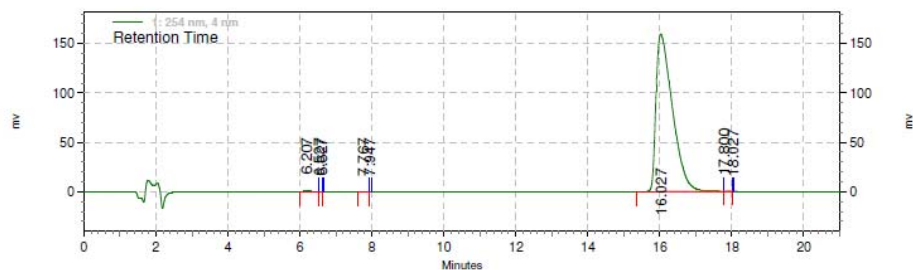

### 1: 254 nm, 4 nm Results

| Retention Time | Area    | Area % | Height | Height % |
|----------------|---------|--------|--------|----------|
| 6.207          | 12876   | 0.25   | 1078   | 0.67     |
| 6.527          | 184     | 0.00   | 52     | 0.03     |
| 6.627          | 78      | 0.00   | 48     | 0.03     |
| 7.767          | 1462    | 0.03   | 127    | 0.08     |
| 7.947          | 90      | 0.00   | 44     | 0.03     |
| 16.027         | 5060265 | 99.68  | 159699 | 99.03    |
| 17.800         | 1495    | 0.03   | 184    | 0.11     |
| 18.027         | 61      | 0.00   | 38     | 0.02     |

| Totals | Area    | Area % | Height | Height % |
|--------|---------|--------|--------|----------|
|        | 5076511 | 100.00 | 161270 | 100.00   |

### Spectrum Max Plot Results

| Retention Time | Area  | Area % | Height | Height % |
|----------------|-------|--------|--------|----------|
| 0.140          | 1116  | 0.01   | 374    | 0.04     |
| 0.293          | 1814  | 0.01   | 466    | 0.05     |
| 0.500          | 2788  | 0.02   | 526    | 0.06     |
| 0.627          | 3977  | 0.03   | 1319   | 0.15     |
| 0.653          | 1909  | 0.01   | 1345   | 0.15     |
| 0.753          | 21083 | 0.16   | 2222   | 0.25     |
| 0.987          | 38882 | 0.29   | 3686   | 0.41     |
| 1.067          | 8946  | 0.07   | 3775   | 0.42     |
| 1.140          | 25210 | 0.19   | 3913   | 0.43     |



Area % Report

Data File: C:\EZChrom Elite\Enterprise\Projects\Nick Lawrence\Data\Roberta\RPM1471 MeOH 50% TFA  
 0.1 in H2O 50% 1ml 20 min TEMPL.met 10-1-2009 12:49:02 AM  
 Method: C:\EZChrom Elite\Enterprise\Projects\Nick Lawrence\Method\Roberta\MeOH 50% TFA 0.1 in  
 H2O 50% 1ml 20 min TEMPL.met  
 Acquired: 10/1/2009 12:50:31 AM  
 Printed: 10/1/2009 9:54:08 AM

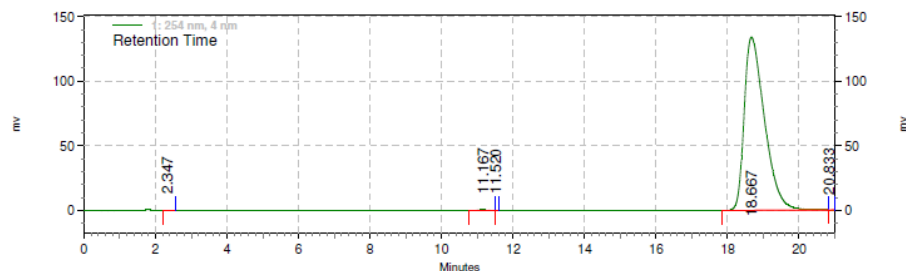

1: 254 nm, 4 nm  
 Results

| Retention Time | Area    | Area % | Height | Height % |
|----------------|---------|--------|--------|----------|
| 2.347          | 1665    | 0.03   | 194    | 0.14     |
| 11.167         | 12521   | 0.24   | 544    | 0.40     |
| 11.520         | 280     | 0.01   | 103    | 0.08     |
| 18.667         | 5301385 | 99.72  | 134098 | 99.30    |
| 20.833         | 553     | 0.01   | 101    | 0.07     |
| <b>Totals</b>  |         |        |        |          |
|                | 5316404 | 100.00 | 135040 | 100.00   |

Spectrum Max  
 Plot Results

| Retention Time | Area | Area % | Height | Height % |
|----------------|------|--------|--------|----------|
| 0.140          | 332  | 0.00   | 342    | 0.07     |
| 0.193          | 272  | 0.00   | 307    | 0.07     |
| 0.267          | 437  | 0.00   | 287    | 0.06     |
| 0.333          | 942  | 0.01   | 866    | 0.19     |
| 0.400          | 1982 | 0.02   | 983    | 0.21     |
| 0.493          | 213  | 0.00   | 228    | 0.05     |
| 0.560          | 817  | 0.01   | 521    | 0.11     |
| 0.600          | 833  | 0.01   | 467    | 0.10     |
| 0.793          | 543  | 0.01   | 203    | 0.04     |
| 0.933          | 615  | 0.01   | 482    | 0.10     |
| 0.987          | 336  | 0.00   | 270    | 0.06     |
| 1.040          | 846  | 0.01   | 394    | 0.09     |

HPLC trace1 of (S)-14h

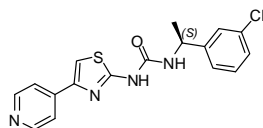

Area % Report

Data File: C:\EZChrom Elite\Enterprise\Projects\Nick Lawrence\Data\Roberta\RPM1478 CH3CN 30%  
 TFA 0.1 in H2O 70% 1ml 20 min TEMP.met 9-29-2009 11-49-07 PM  
 Method: C:\EZChrom Elite\Enterprise\Projects\Nick Lawrence\Method\Roberta\CH3CN 30% TFA 0.1 in  
 H2O 70% 1ml 20 min TEMP.met  
 Acquired: 9/29/2009 11:50:38 PM  
 Printed: 9/30/2009 9:41:51 AM

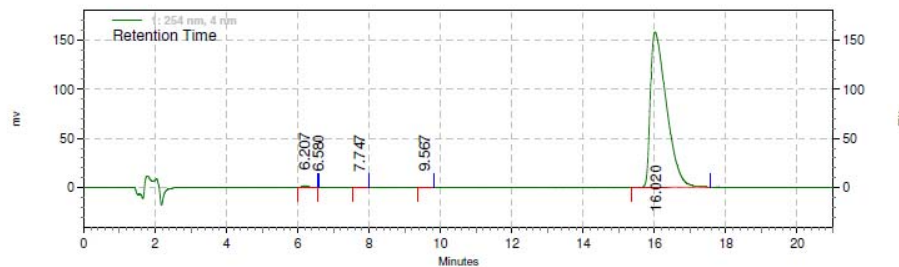

1: 254 nm, 4 nm  
 Results

| Retention Time | Area    | Area % | Height | Height % |
|----------------|---------|--------|--------|----------|
| 6.207          | 23188   | 0.47   | 1962   | 1.23     |
| 6.580          | 45      | 0.00   | 55     | 0.03     |
| 7.747          | 2606    | 0.05   | 198    | 0.12     |
| 9.567          | 1337    | 0.03   | 106    | 0.07     |
| 16.020         | 4949680 | 99.45  | 157826 | 98.55    |
| <b>Totals</b>  |         |        |        |          |
|                | 4976856 | 100.00 | 160147 | 100.00   |

Spectrum Max  
 Plot Results

| Retention Time | Area  | Area % | Height | Height % |
|----------------|-------|--------|--------|----------|
| 0.173          | 120   | 0.00   | 120    | 0.01     |
| 0.287          | 1971  | 0.01   | 596    | 0.07     |
| 0.460          | 6588  | 0.05   | 1252   | 0.14     |
| 0.607          | 21266 | 0.16   | 2062   | 0.23     |
| 0.727          | 8667  | 0.06   | 2620   | 0.29     |
| 0.813          | 17105 | 0.13   | 3044   | 0.34     |
| 0.960          | 31180 | 0.23   | 3960   | 0.44     |
| 1.013          | 8050  | 0.06   | 4138   | 0.46     |
| 1.060          | 18702 | 0.14   | 4339   | 0.49     |
| 1.167          | 30110 | 0.22   | 5037   | 0.56     |
| 1.227          | 24564 | 0.18   | 5323   | 0.60     |
| 1.307          | 26225 | 0.19   | 5368   | 0.60     |

Area % Report

Data File: C:\EZChrom Elite\Enterprise\Projects\Nick Lawrence\Data\Roberta\RPM1478 MeOH 50% TFA  
 0.1 in H2O 50% 1ml 20 min TEMPL.met 10-1-2009 12-03-50 AM  
 Method: C:\EZChrom Elite\Enterprise\Projects\Nick Lawrence\Method\Roberta\MeOH 50% TFA 0.1 in  
 H2O 50% 1ml 20 min TEMPL.met  
 Acquired: 10/1/2009 12:05:19 AM  
 Printed: 10/1/2009 9:52:30 AM

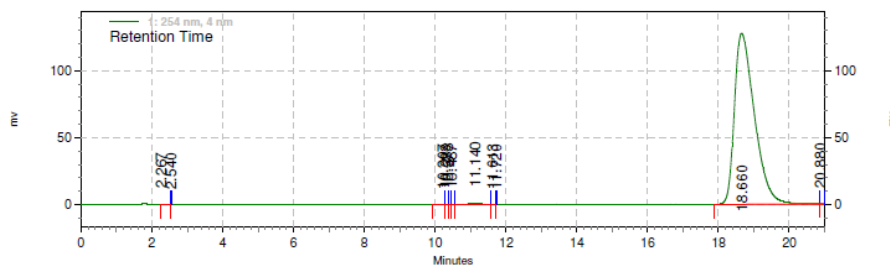

1: 254 nm, 4 nm  
 Results

| Retention Time | Area    | Area % | Height | Height % |
|----------------|---------|--------|--------|----------|
| 2.267          | 505     | 0.01   | 61     | 0.05     |
| 2.540          | 42      | 0.00   | 40     | 0.03     |
| 10.207         | 1299    | 0.03   | 113    | 0.09     |
| 10.293         | 449     | 0.01   | 95     | 0.07     |
| 10.373         | 239     | 0.00   | 94     | 0.07     |
| 10.487         | 187     | 0.00   | 57     | 0.04     |
| 11.140         | 23017   | 0.46   | 980    | 0.76     |
| 11.613         | 384     | 0.01   | 96     | 0.07     |
| 11.720         | 20      | 0.00   | 22     | 0.02     |
| 18.660         | 5029050 | 99.47  | 127796 | 98.72    |
| 20.880         | 413     | 0.01   | 102    | 0.08     |

| Totals | Area    | Area % | Height | Height % |
|--------|---------|--------|--------|----------|
|        | 5055605 | 100.00 | 129456 | 100.00   |

Spectrum Max  
 Plot Results

| Retention Time | Area | Area % | Height | Height % |
|----------------|------|--------|--------|----------|
| 0.193          | 545  | 0.01   | 555    | 0.15     |
| 0.307          | 567  | 0.01   | 547    | 0.15     |
| 0.360          | 185  | 0.00   | 290    | 0.08     |
| 0.420          | 304  | 0.00   | 145    | 0.04     |
| 0.533          | 549  | 0.01   | 481    | 0.13     |
| 0.593          | 719  | 0.01   | 19     | 0.01     |

# HPLC trace1 of (R)-14i

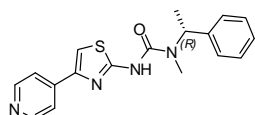

## Area % Report

Data File: C:\EZChrom Elite\Enterprise\Projects\Nick Lawrence\Data\Roberta\RPM1364 CH3CN 30%  
 TFA 0.1 in H2O 70% 1ml 20 min TEMPL.met 5-14-2009 1-20-55 AM  
 Method: C:\EZChrom Elite\Enterprise\Projects\Nick Lawrence\Method\Roberta\CH3CN 30% TFA 0.1 in  
 H2O 70% 1ml 20 min TEMPL.met  
 Acquired: 5/14/2009 1:22:23 AM  
 Printed: 5/14/2009 10:27:03 AM

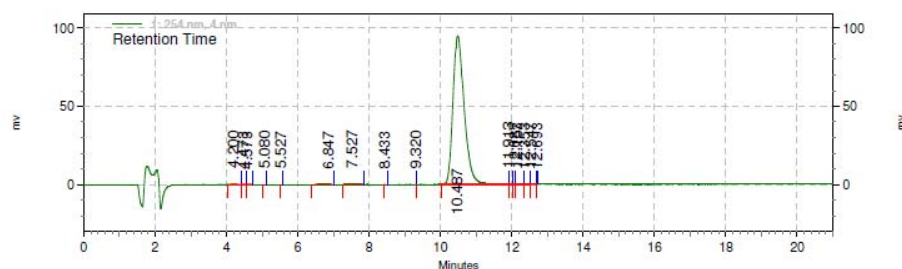

### 1: 254 nm, 4 nm

#### Results

| Retention Time | Area           | Area %        | Height       | Height %      |
|----------------|----------------|---------------|--------------|---------------|
| 4.200          | 3638           | 0.17          | 384          | 0.40          |
| 4.473          | 233            | 0.01          | 45           | 0.05          |
| 4.573          | 271            | 0.01          | 52           | 0.05          |
| 5.080          | 180            | 0.01          | 44           | 0.05          |
| 5.527          | 102            | 0.00          | 41           | 0.04          |
| 6.847          | 2464           | 0.12          | 149          | 0.15          |
| 7.527          | 10739          | 0.51          | 716          | 0.74          |
| 8.433          | 122            | 0.01          | 61           | 0.06          |
| 9.320          | 6              | 0.00          | 16           | 0.02          |
| 10.487         | 2080484        | 98.96         | 94900        | 97.77         |
| 11.913         | 1307           | 0.06          | 183          | 0.19          |
| 12.087         | 605            | 0.03          | 161          | 0.17          |
| 12.153         | 1299           | 0.06          | 133          | 0.14          |
| 12.353         | 651            | 0.03          | 85           | 0.09          |
| 12.547         | 267            | 0.01          | 58           | 0.06          |
| 12.693         | 49             | 0.00          | 40           | 0.04          |
| <b>Totals</b>  | <b>2102417</b> | <b>100.00</b> | <b>97068</b> | <b>100.00</b> |

### Spectrum Max

#### Plot Results

| Retention Time | Area | Area % | Height | Height % |
|----------------|------|--------|--------|----------|
| 0.647          | 342  | 0.00   | 261    | 0.04     |

**Area Percent Report**

data\Roberta\NCDDG\Roek project\RPM1364Batch25April2009 Chiral IPA 80 Hex 20 flow1ml 60min.met+27-2009 4-54-58 PM.dat  
 Acquired: 4/27/2009 4:55:30 PM

Page 1 of 2 Data File: C:\HPLC  
 Printed: 4/27/2009 6:03:58 PM

Analyst: System  
 Sample ID: RPM1364Batch25April2009

Vial: N/A Injection Volume: 0

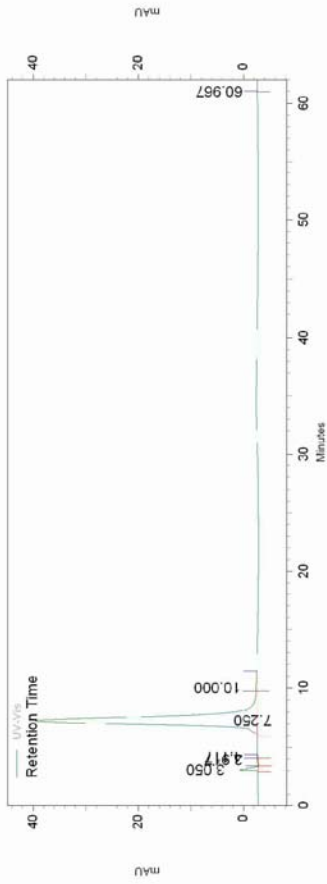

**UV-Vis Results**

| Name | Retention Time | Area    | Area Percent | Integration Codes |
|------|----------------|---------|--------------|-------------------|
|      | 3.050          | 43958   | 2.222        | BB                |
|      | 3.917          | 4516    | 0.228        | BV                |
|      | 4.117          | 1011    | 0.051        | VB                |
|      | 7.250          | 1919234 | 97.019       | BV                |
|      | 10.000         | 9480    | 0.479        | VB                |

Instrument Name: HPLC  
 Acquisition Method: C:\EZStart\Projects\Default\Method\Roberta\Chiral IPA 80 Hex 20 flow1ml 60min.met  
 Sequence: C:\HPLC\data\Dan abc.seq  
 Software Version: Version 3.1.7

HPLC trace1 of (S)-14i

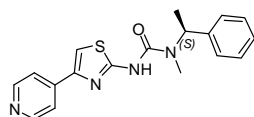

Area % Report

Data File: C:\EZChrom Elite\Enterprise\Projects\Nick Lawrence\Data\Roberta\RPM1365 CH3CN 30%  
 TFA 0.1 in H2O 70% 1ml 20 min TEMPL.met 5-13-2009 10:20:03 PM  
 Method: C:\EZChrom Elite\Enterprise\Projects\Nick Lawrence\Method\Roberta\CH3CN 30% TFA 0.1 in  
 H2O 70% 1ml 20 min TEMPL.met  
 Acquired: 5/13/2009 10:21:34 PM  
 Printed: 5/14/2009 10:20:45 AM

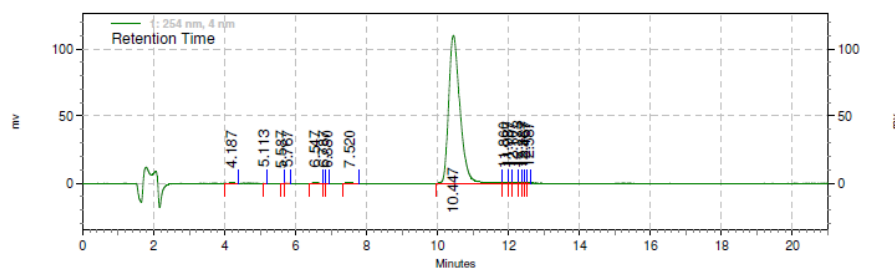

1: 254 nm, 4 nm

Results

| Retention Time | Area    | Area % | Height | Height % |
|----------------|---------|--------|--------|----------|
| 4.187          | 4013    | 0.17   | 413    | 0.37     |
| 5.113          | 158     | 0.01   | 47     | 0.04     |
| 5.587          | 148     | 0.01   | 29     | 0.03     |
| 5.767          | 228     | 0.01   | 47     | 0.04     |
| 6.547          | 2291    | 0.09   | 174    | 0.16     |
| 6.787          | 98      | 0.00   | 58     | 0.05     |
| 6.880          | 114     | 0.00   | 38     | 0.03     |
| 7.520          | 2262    | 0.09   | 179    | 0.16     |
| 10.447         | 2410531 | 99.43  | 110192 | 98.42    |
| 11.860         | 1719    | 0.07   | 218    | 0.19     |
| 11.987         | 970     | 0.04   | 157    | 0.14     |
| 12.107         | 926     | 0.04   | 147    | 0.13     |
| 12.273         | 478     | 0.02   | 102    | 0.09     |
| 12.387         | 227     | 0.01   | 60     | 0.05     |
| 12.467         | 128     | 0.01   | 61     | 0.05     |
| 12.587         | 134     | 0.01   | 41     | 0.04     |

| Totals | Area    | Area % | Height | Height % |
|--------|---------|--------|--------|----------|
|        | 2424425 | 100.00 | 111963 | 100.00   |

Spectrum Max

Plot Results

| Retention Time | Area | Area % | Height | Height % |
|----------------|------|--------|--------|----------|
| 0.333          | 2418 | 0.03   | 171    | 0.02     |

**Area Percent Report**  
 data\Roberta\NCDDG\Rock project\RPM1365 Chiral IPA 80 Hex 20 flow1ml 60min.met4-27-2009 3-07-26 PM.dat  
 Page 1 of 2 Data File: C:\HPLC  
 Acquired: 4/27/2009 3:07:48 PM  
 Printed: 4/27/2009 4:13:09 PM

Analyst: System  
 Sample ID: RPM1365  
 Vial: N/A  
 Injection Volume: 0

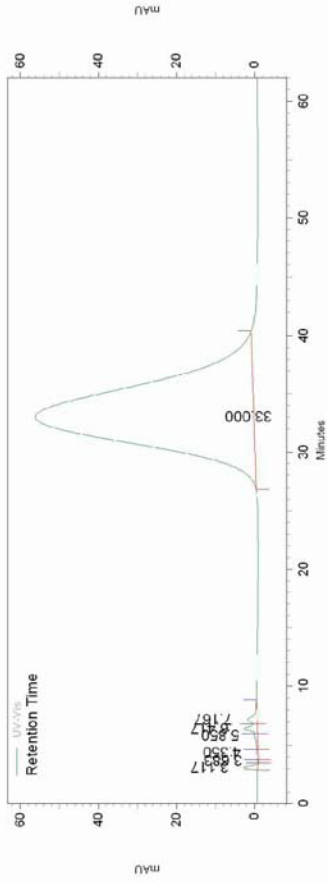

| Name | Retention Time | Area  | Area Percent | Integration Codes |
|------|----------------|-------|--------------|-------------------|
|      | 3.117          | 71670 | 0.375        | BB                |
|      | 3.683          | 4176  | 0.022        | BV                |
|      | 4.350          | 22901 | 0.120        | VV                |
|      | 5.850          | 48617 | 0.255        | VV                |
|      | 6.417          | 98816 | 0.517        | VV                |

Instrument Name: HPLC  
 Acquisition Method: C:\EZStart\Projects\Default\Method\Roberta\Chiral IPA 80 Hex 20 flow1ml 60min.met  
 Sequence: C:\HPLC\data\Dan\abc.seq  
 Software Version: Version 3.1.7

# Area Percent Report

data\Roberta\NCDDC\Rock project\RPM1365 Chiral IPA 80 Hex 20 flow 1ml 60min.met 4-27-2009 3-07-26 PM.dat  
Acquired: 4/27/2009 3:07:48 PM

Page 2 of 2 Data File: C:\HPLC

Printed: 4/27/2009 4:13:09 PM

7.167 94501 0.495 VB  
33,000 18756654 98.216 mm

|        |  |          |         |
|--------|--|----------|---------|
| Totals |  | 19097335 | 100.000 |
|--------|--|----------|---------|

Instrument Name: HPLC Software Version: Version 3.1.7  
Acquisition Method: C:\EZStart\Projects\Default\Method\Roberta\Chiral IPA 80 Hex 20 flow 1ml 60min.met  
Sequence: C:\HPLC\data\Dan\abc.seq



# HPLC trace of 5g-Mes

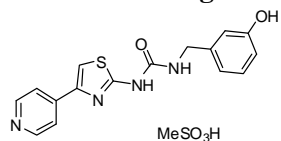

## Area % Report

Data File: C:\EZChrom Elite\Enterprise\Projects\Nick Lawrence\Data\Roberta\RPM1447MesBatch20July2010 MeOH 40% TFA 0.1 in H2O 60% 1ml 20 min  
 TEMPL.met 7-21-2010 7:53-16 PM  
 Method: C:\EZChrom Elite\Enterprise\Projects\Nick Lawrence\Method\Roberta\MeOH 40% TFA 0.1 in H2O 60% 1ml 20 min TEMPL.met  
 Acquired: 7/21/2010 7:54:44 PM  
 Printed: 7/22/2010 9:32:52 AM

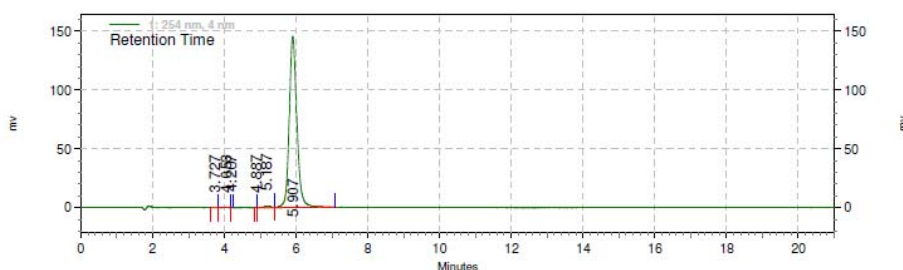

### 1: 254 nm, 4 nm Results

| Retention Time | Area           | Area %        | Height        | Height %      |
|----------------|----------------|---------------|---------------|---------------|
| 3.727          | 432            | 0.02          | 82            | 0.06          |
| 4.053          | 1199           | 0.06          | 114           | 0.08          |
| 4.207          | 112            | 0.01          | 54            | 0.04          |
| 4.887          | 151            | 0.01          | 78            | 0.05          |
| 5.187          | 15781          | 0.73          | 974           | 0.66          |
| 5.907          | 2155745        | 99.19         | 145339        | 99.11         |
| <b>Totals</b>  | <b>2173420</b> | <b>100.00</b> | <b>146641</b> | <b>100.00</b> |

### Spectrum Max Plot Results

| Retention Time | Area | Area % | Height | Height % |
|----------------|------|--------|--------|----------|
| 0.200          | 714  | 0.02   | 273    | 0.06     |
| 0.347          | 709  | 0.02   | 586    | 0.13     |
| 0.420          | 954  | 0.02   | 449    | 0.10     |
| 0.547          | 1181 | 0.03   | 598    | 0.13     |
| 0.600          | 669  | 0.02   | 876    | 0.20     |
| 0.647          | 983  | 0.02   | 635    | 0.14     |
| 0.747          | 1232 | 0.03   | 490    | 0.11     |
| 0.813          | 1294 | 0.03   | 848    | 0.19     |
| 0.907          | 1038 | 0.02   | 448    | 0.10     |
| 1.033          | 1214 | 0.03   | 497    | 0.11     |

# HPLC trace of (5d-Mes)

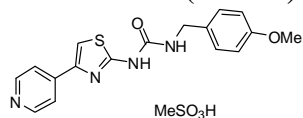

## Area % Report

Data File: C:\EZChrom Elite\Enterprise\Projects\Nick Lawrence\Data\Roberta\RPM1538 MeOH 50% TFA 0.1 in H2O 50% 1ml 20 min TEMPL.met 2-9-2010 2-42-40 PM  
 Method: C:\EZChrom Elite\Enterprise\Projects\Nick Lawrence\Method\Roberta\MeOH 40% TFA 0.1 in H2O 60% 1ml 20 min TEMPL.met  
 Acquired: 2/9/2010 2:44:08 PM  
 Printed: 2/9/2010 6:51:06 PM

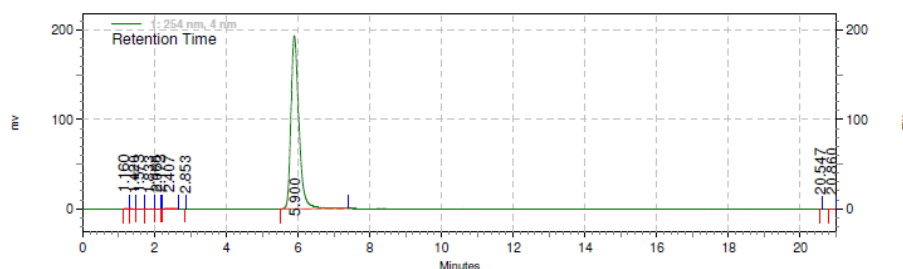

### 1: 254 nm, 4 nm Results

| Retention Time | Area    | Area % | Height | Height % |
|----------------|---------|--------|--------|----------|
| 1.160          | 453     | 0.01   | 70     | 0.04     |
| 1.420          | 1012    | 0.03   | 133    | 0.07     |
| 1.573          | 1748    | 0.06   | 156    | 0.08     |
| 1.833          | 4848    | 0.16   | 559    | 0.29     |
| 2.060          | 1117    | 0.04   | 150    | 0.08     |
| 2.173          | 314     | 0.01   | 110    | 0.06     |
| 2.407          | 4867    | 0.16   | 426    | 0.22     |
| 2.853          | 50      | 0.00   | 56     | 0.03     |
| 5.900          | 3012633 | 99.51  | 193636 | 99.10    |
| 20.547         | 133     | 0.00   | 53     | 0.03     |
| 20.860         | 308     | 0.01   | 55     | 0.03     |

| Totals | Area    | Area % | Height | Height % |
|--------|---------|--------|--------|----------|
|        | 3027483 | 100.00 | 195404 | 100.00   |

### Spectrum Max Plot Results

| Retention Time | Area | Area % | Height | Height % |
|----------------|------|--------|--------|----------|
| 0.133          | 180  | 0.00   | 304    | 0.06     |
| 0.207          | 323  | 0.01   | 571    | 0.11     |
| 0.293          | 24   | 0.00   | 85     | 0.02     |
| 0.340          | 798  | 0.01   | 394    | 0.08     |
| 0.453          | 209  | 0.00   | 222    | 0.04     |
| 0.527          | 778  | 0.01   | 314    | 0.06     |

# HPLC trace of 5b-Mes

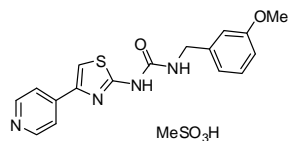

## Area % Report

Data File: C:\EZChrom Elite\Enterprise\Projects\Nick Lawrence\Data\Roberta\RPM1539 MeOH 50% TFA 0.1 in H2O 50% 1ml 20 min TEMPL.met 2-9-2010 3-27-48 PM  
 Method: C:\EZChrom Elite\Enterprise\Projects\Nick Lawrence\Method\Roberta\MeOH 40% TFA 0.1 in H2O 60% 1ml 20 min TEMPL.met  
 Acquired: 2/9/2010 3:29:19 PM  
 Printed: 2/9/2010 6:49:26 PM

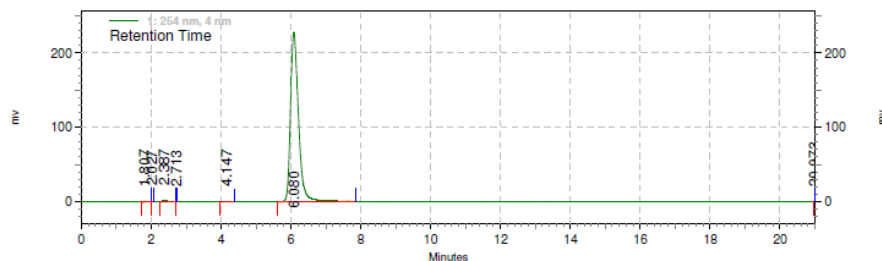

### 1: 254 nm, 4 nm Results

| Retention Time | Area    | Area % | Height | Height % |
|----------------|---------|--------|--------|----------|
| 1.807          | 6615    | 0.18   | 805    | 0.35     |
| 2.027          | 274     | 0.01   | 116    | 0.05     |
| 2.387          | 14150   | 0.39   | 1437   | 0.62     |
| 2.713          | 44      | 0.00   | 33     | 0.01     |
| 4.147          | 4926    | 0.14   | 414    | 0.18     |
| 6.080          | 3622550 | 99.29  | 227857 | 98.76    |
| 20.973         | 63      | 0.00   | 47     | 0.02     |

| Totals | Area    | Area % | Height | Height % |
|--------|---------|--------|--------|----------|
|        | 3648622 | 100.00 | 230709 | 100.00   |

### Spectrum Max Plot Results

| Retention Time | Area   | Area % | Height | Height % |
|----------------|--------|--------|--------|----------|
| 0.380          | 462    | 0.01   | 291    | 0.06     |
| 0.660          | 747    | 0.01   | 438    | 0.09     |
| 0.760          | 270    | 0.00   | 51     | 0.01     |
| 0.873          | 339    | 0.00   | 149    | 0.03     |
| 1.140          | 610    | 0.01   | 244    | 0.05     |
| 1.200          | 617    | 0.01   | 477    | 0.09     |
| 1.287          | 319    | 0.00   | 196    | 0.04     |
| 1.400          | 367    | 0.01   | 99     | 0.02     |
| 1.613          | 806    | 0.01   | 113    | 0.02     |
| 1.753          | 376872 | 5.49   | 63513  | 12.39    |

# HPLC trace of compound **5g-HCl**

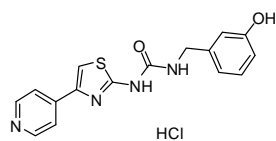

## Area % Report

Data File: C:\EZChrom Elite\Enterprise\Projects\Nick Lawrence\Data\Roberta\RPM1542 MeOH 40% TFA 0.1 in H2O 60% 1ml 20 min TEMPL.met 2-9-2010 7-18-41 PM  
 Method: C:\EZChrom Elite\Enterprise\Projects\Nick Lawrence\Method\Roberta\MeOH 40% TFA 0.1 in H2O 60% 1ml 20 min TEMPL.met  
 Acquired: 2/9/2010 7:20:09 PM  
 Printed: 2/10/2010 9:41:42 AM

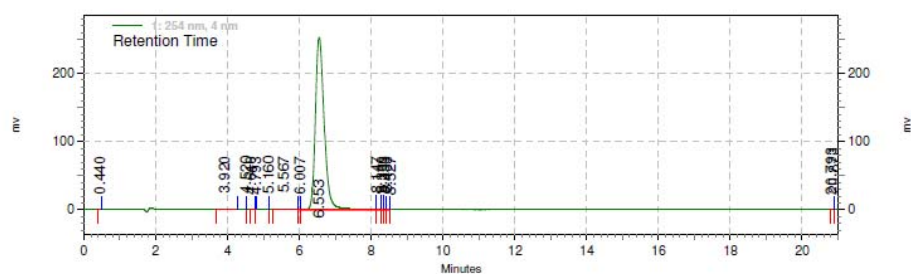

### 1: 254 nm, 4 nm Results

| Retention Time | Area    | Area % | Height | Height % |
|----------------|---------|--------|--------|----------|
| 0.440          | 98      | 0.00   | 44     | 0.02     |
| 3.920          | 10576   | 0.24   | 841    | 0.33     |
| 4.520          | 15      | 0.00   | 37     | 0.01     |
| 4.640          | 254     | 0.01   | 55     | 0.02     |
| 4.793          | 58      | 0.00   | 61     | 0.02     |
| 5.160          | 18      | 0.00   | 26     | 0.01     |
| 5.567          | 13690   | 0.32   | 830    | 0.33     |
| 6.007          | 153     | 0.00   | 42     | 0.02     |
| 6.553          | 4290794 | 99.35  | 252738 | 98.97    |
| 8.147          | 1663    | 0.04   | 229    | 0.09     |
| 8.300          | 431     | 0.01   | 165    | 0.06     |
| 8.353          | 526     | 0.01   | 126    | 0.05     |
| 8.433          | 275     | 0.01   | 74     | 0.03     |
| 8.527          | 36      | 0.00   | 39     | 0.02     |
| 20.793         | 183     | 0.00   | 55     | 0.02     |
| 20.873         | 0       | 0.00   | 0      | 0.00     |

| Totals | Area    | Area % | Height | Height % |
|--------|---------|--------|--------|----------|
|        | 4318770 | 100.00 | 255362 | 100.00   |

### Spectrum Max Plot Results

| Retention Time | Area | Area % | Height | Height % |
|----------------|------|--------|--------|----------|
| 0.167          | 378  | 0.00   | 603    | 0.11     |

# HPLC trace of 5d-HCl

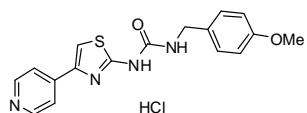

## Area % Report

Data File: C:\EZChrom Elite\Enterprise\Projects\Nick Lawrence\Data\Roberta\RPM1518 MeOH 50% TFA  
 0.1 in H2O 50% 1ml 20 min TEMPL.met 2-9-2010 4-12-56 PM  
 Method: C:\EZChrom Elite\Enterprise\Projects\Nick Lawrence\Method\Roberta\MeOH 40% TFA 0.1 in  
 H2O 60% 1ml 20 min TEMPL.met  
 Acquired: 2/9/2010 4:14:24 PM  
 Printed: 2/9/2010 6:47:58 PM

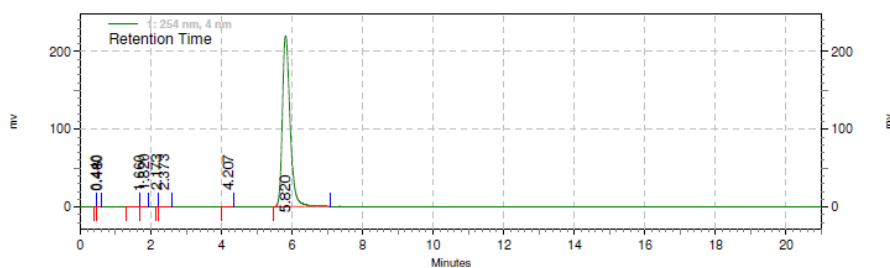

### 1: 254 nm, 4 nm

#### Results

| Retention Time | Area    | Area % | Height | Height % |
|----------------|---------|--------|--------|----------|
| 0.440          | 128     | 0.00   | 59     | 0.03     |
| 0.480          | 189     | 0.01   | 36     | 0.02     |
| 1.660          | 1927    | 0.06   | 155    | 0.07     |
| 1.820          | 3271    | 0.10   | 499    | 0.23     |
| 2.173          | 80      | 0.00   | 37     | 0.02     |
| 2.373          | 4052    | 0.12   | 382    | 0.17     |
| 4.207          | 1074    | 0.03   | 89     | 0.04     |
| 5.820          | 3351678 | 99.68  | 220319 | 99.43    |

| Totals | Area    | Area % | Height | Height % |
|--------|---------|--------|--------|----------|
|        | 3362399 | 100.00 | 221576 | 100.00   |

### Spectrum Max

#### Plot Results

| Retention Time | Area | Area % | Height | Height % |
|----------------|------|--------|--------|----------|
| 0.107          | 1453 | 0.02   | 1024   | 0.14     |
| 0.167          | 941  | 0.01   | 608    | 0.09     |
| 0.207          | 1290 | 0.02   | 790    | 0.11     |
| 0.267          | 4095 | 0.06   | 1093   | 0.15     |
| 0.347          | 1735 | 0.03   | 1292   | 0.18     |
| 0.400          | 2115 | 0.03   | 868    | 0.12     |
| 0.493          | 3251 | 0.05   | 1187   | 0.17     |
| 0.627          | 4549 | 0.07   | 983    | 0.14     |
| 0.813          | 7022 | 0.11   | 1492   | 0.21     |

# HPLC trace of 5b-HCl

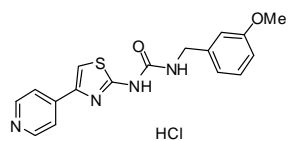

## Area % Report

Data File: C:\EZChrom Elite\Enterprise\Projects\Nick Lawrence\Data\Roberta\RPM1541 MeOH 50% TFA  
 0.1 in H2O 50% 1ml 20 min TEMPL.met 2-9-2010 4:58:05 PM  
 Method: C:\EZChrom Elite\Enterprise\Projects\Nick Lawrence\Method\Roberta\MeOH 40% TFA 0.1 in  
 H2O 60% 1ml 20 min TEMPL.met  
 Acquired: 2/9/2010 4:59:34 PM  
 Printed: 2/9/2010 6:46:22 PM

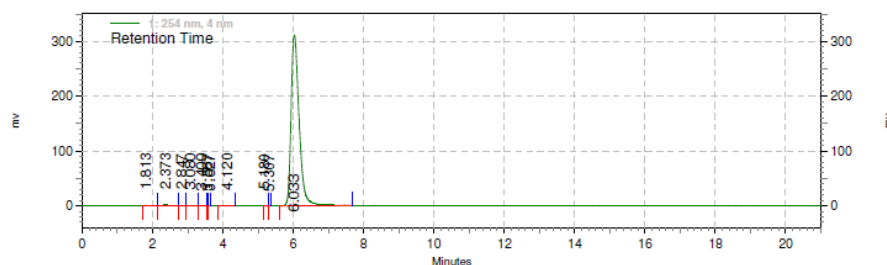

### 1: 254 nm, 4 nm Results

| Retention Time | Area    | Area % | Height | Height % |
|----------------|---------|--------|--------|----------|
| 1.813          | 10294   | 0.21   | 1109   | 0.35     |
| 2.373          | 21268   | 0.43   | 1994   | 0.63     |
| 2.847          | 1233    | 0.02   | 131    | 0.04     |
| 3.080          | 2999    | 0.06   | 264    | 0.08     |
| 3.400          | 611     | 0.01   | 79     | 0.03     |
| 3.567          | 124     | 0.00   | 61     | 0.02     |
| 3.627          | 152     | 0.00   | 52     | 0.02     |
| 4.120          | 7187    | 0.14   | 544    | 0.17     |
| 5.180          | 304     | 0.01   | 54     | 0.02     |
| 5.307          | 94      | 0.00   | 33     | 0.01     |
| 6.033          | 4920700 | 99.11  | 311510 | 98.63    |

| Totals | Area    | Area % | Height | Height % |
|--------|---------|--------|--------|----------|
|        | 4964966 | 100.00 | 315831 | 100.00   |

### Spectrum Max Plot Results

| Retention Time | Area | Area % | Height | Height % |
|----------------|------|--------|--------|----------|
| 0.160          | 2246 | 0.02   | 945    | 0.13     |
| 0.287          | 1721 | 0.02   | 450    | 0.06     |
| 0.407          | 895  | 0.01   | 643    | 0.09     |
| 0.460          | 844  | 0.01   | 456    | 0.06     |
| 0.547          | 1837 | 0.02   | 744    | 0.10     |
| 0.693          | 1844 | 0.02   | 699    | 0.09     |
